# Supplementary material for: Evidence for Sequential and Increasing Activation of Replication Origins along Replication Timing Gradients in the Human Genome
Source: PubMed Central journal article supplement (PMC3248390; doi:10.1371/journal.pcbi.1002322), 2011-12-29

# Replication Timing Vs Encode Origin data, ENr231 (chr1:149424684\_149924684)

Annotation

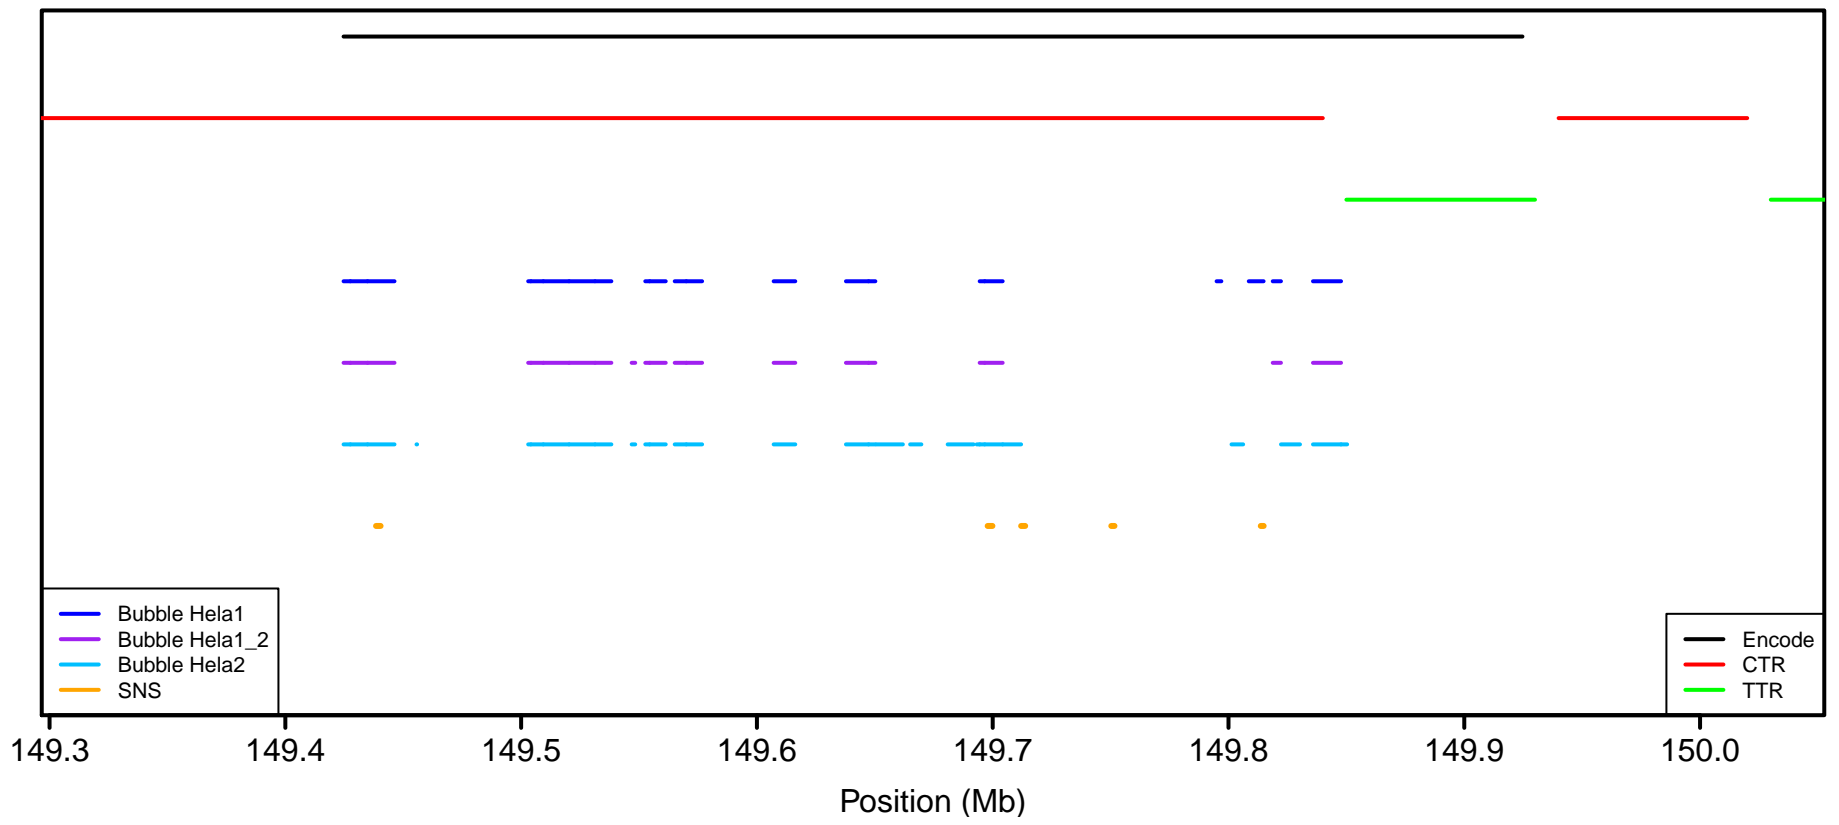

Timing of HeLa

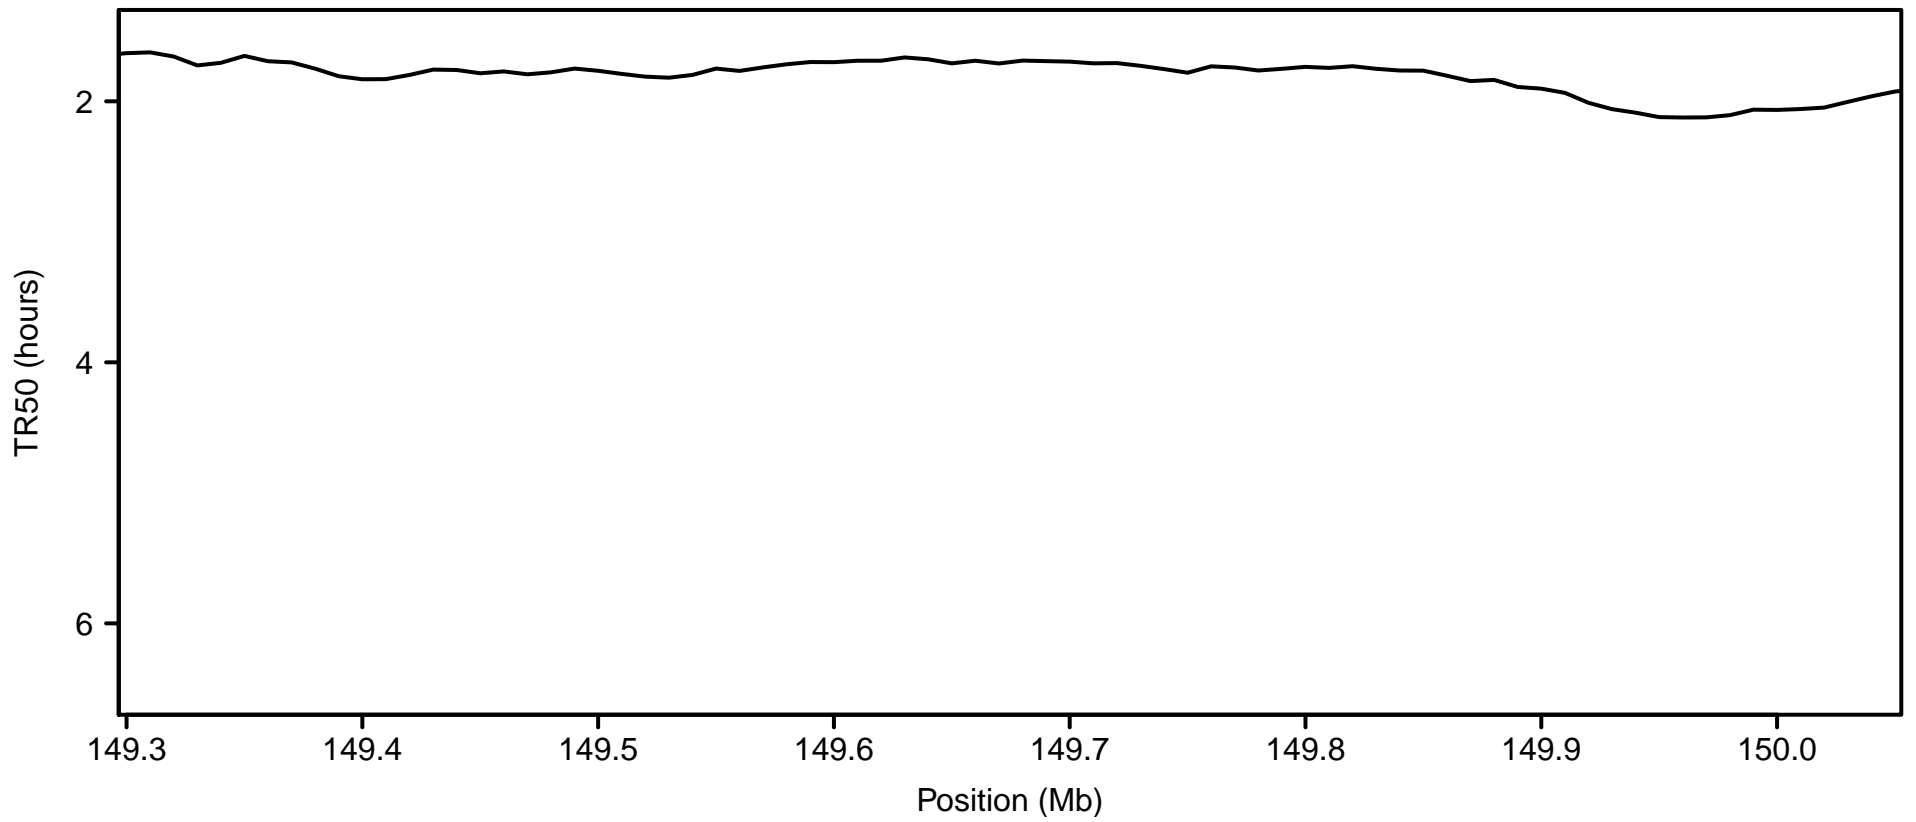

Apparent replication speed

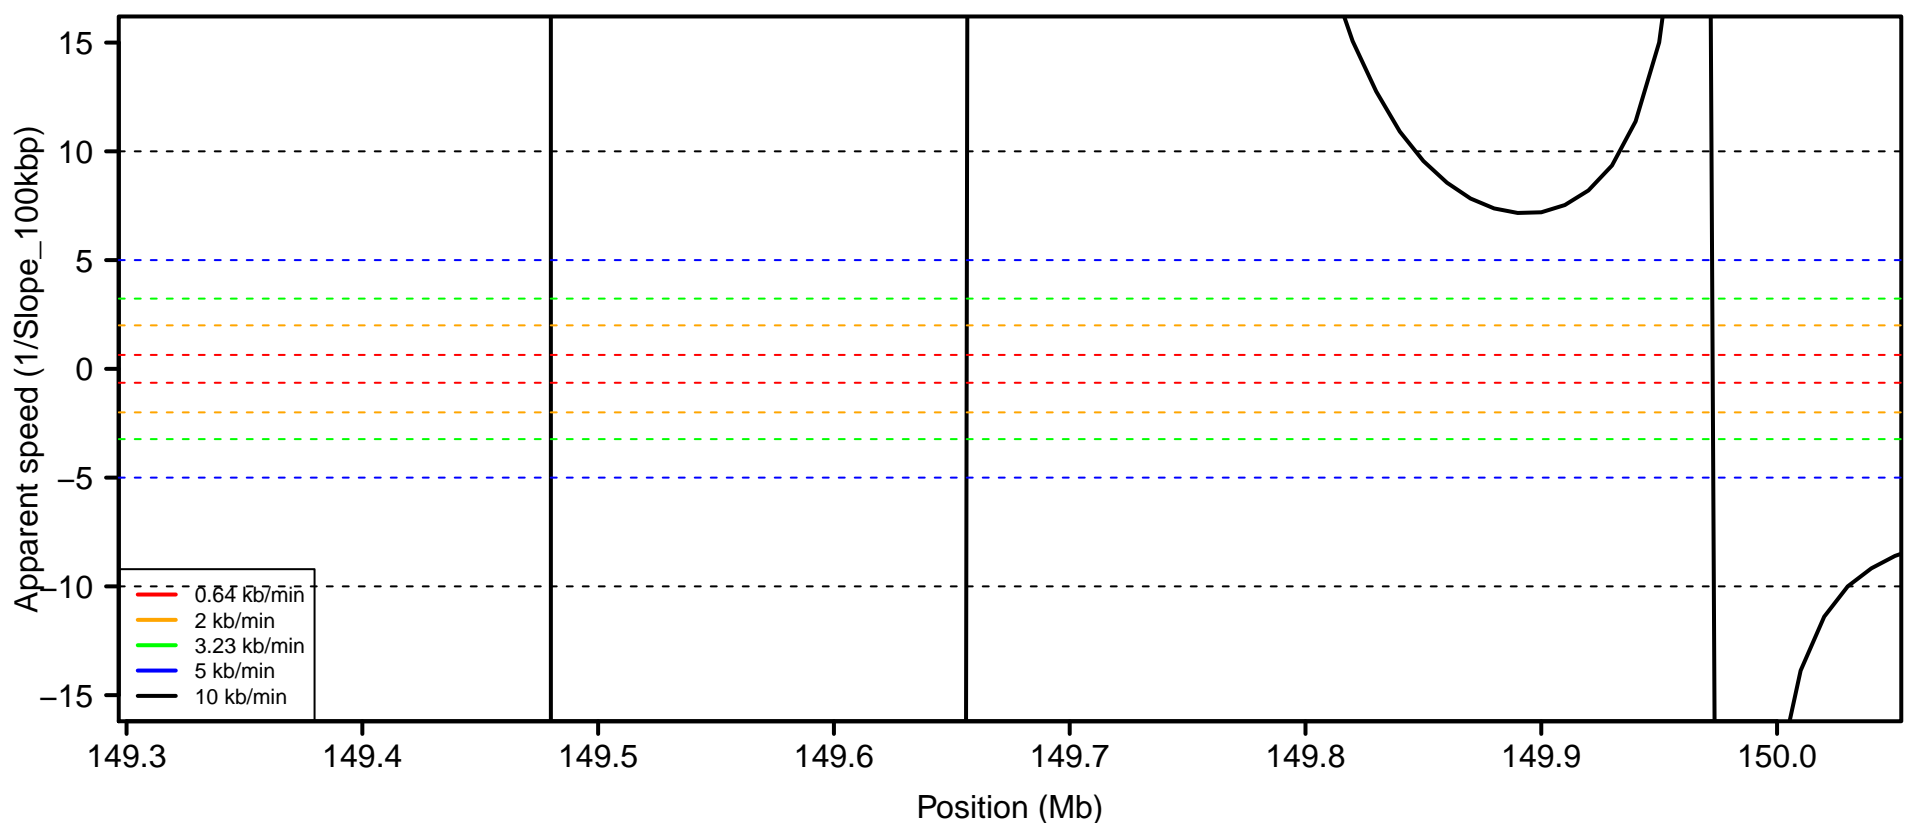

# Replication Timing Vs Encode Origin data, ENr112 (chr2:51512208\_52012208)

Annotation

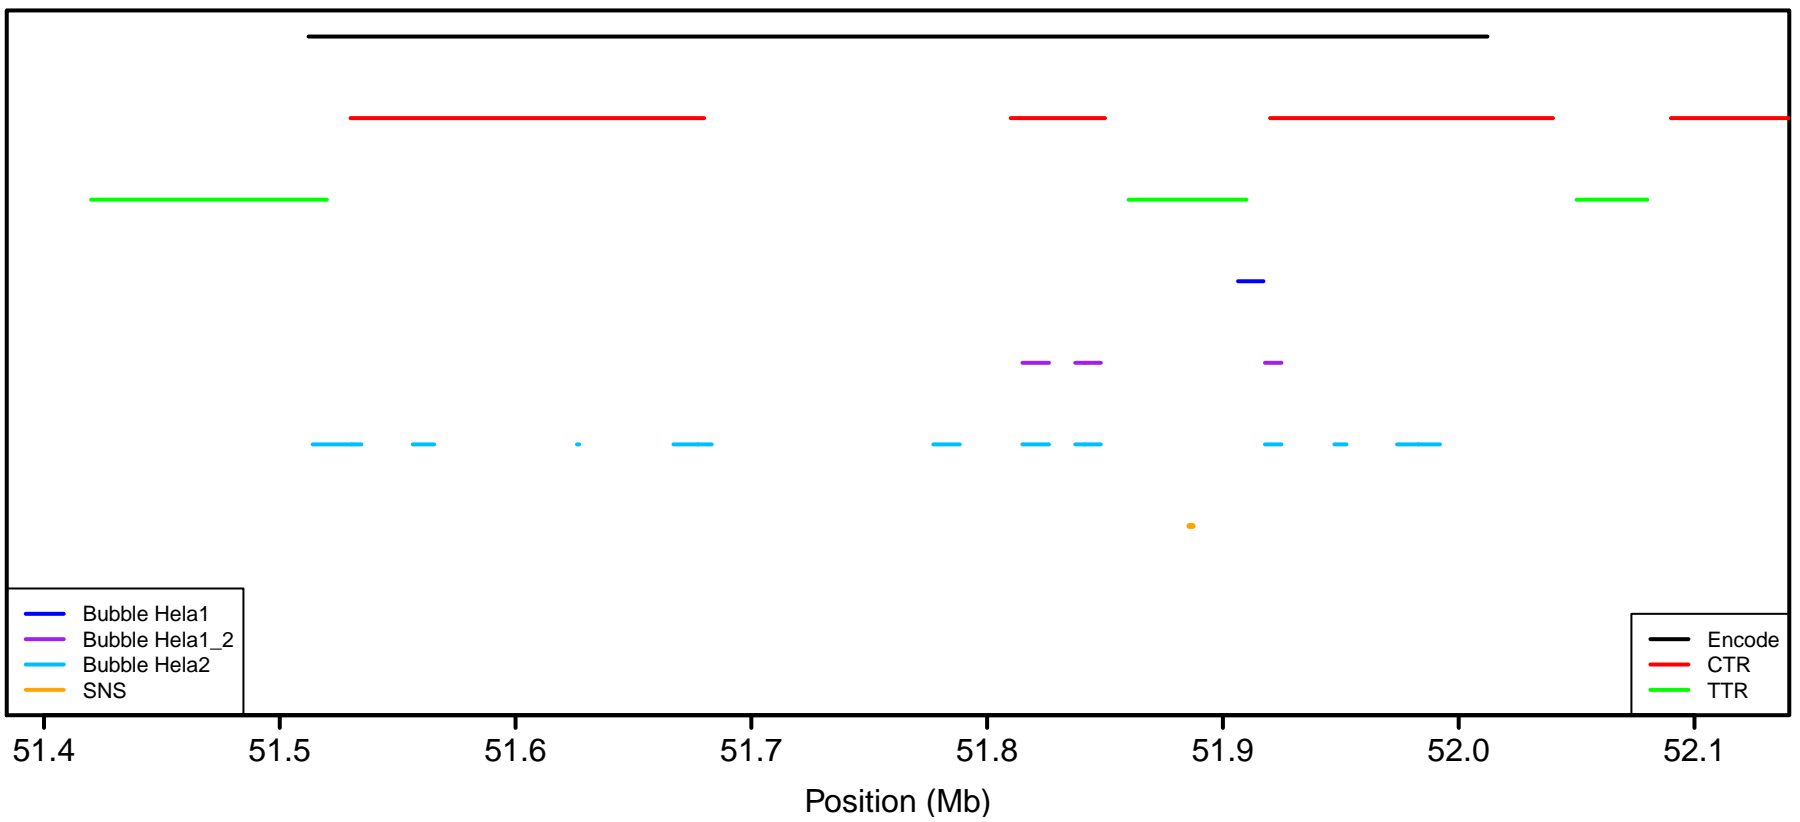

Timing of Helia

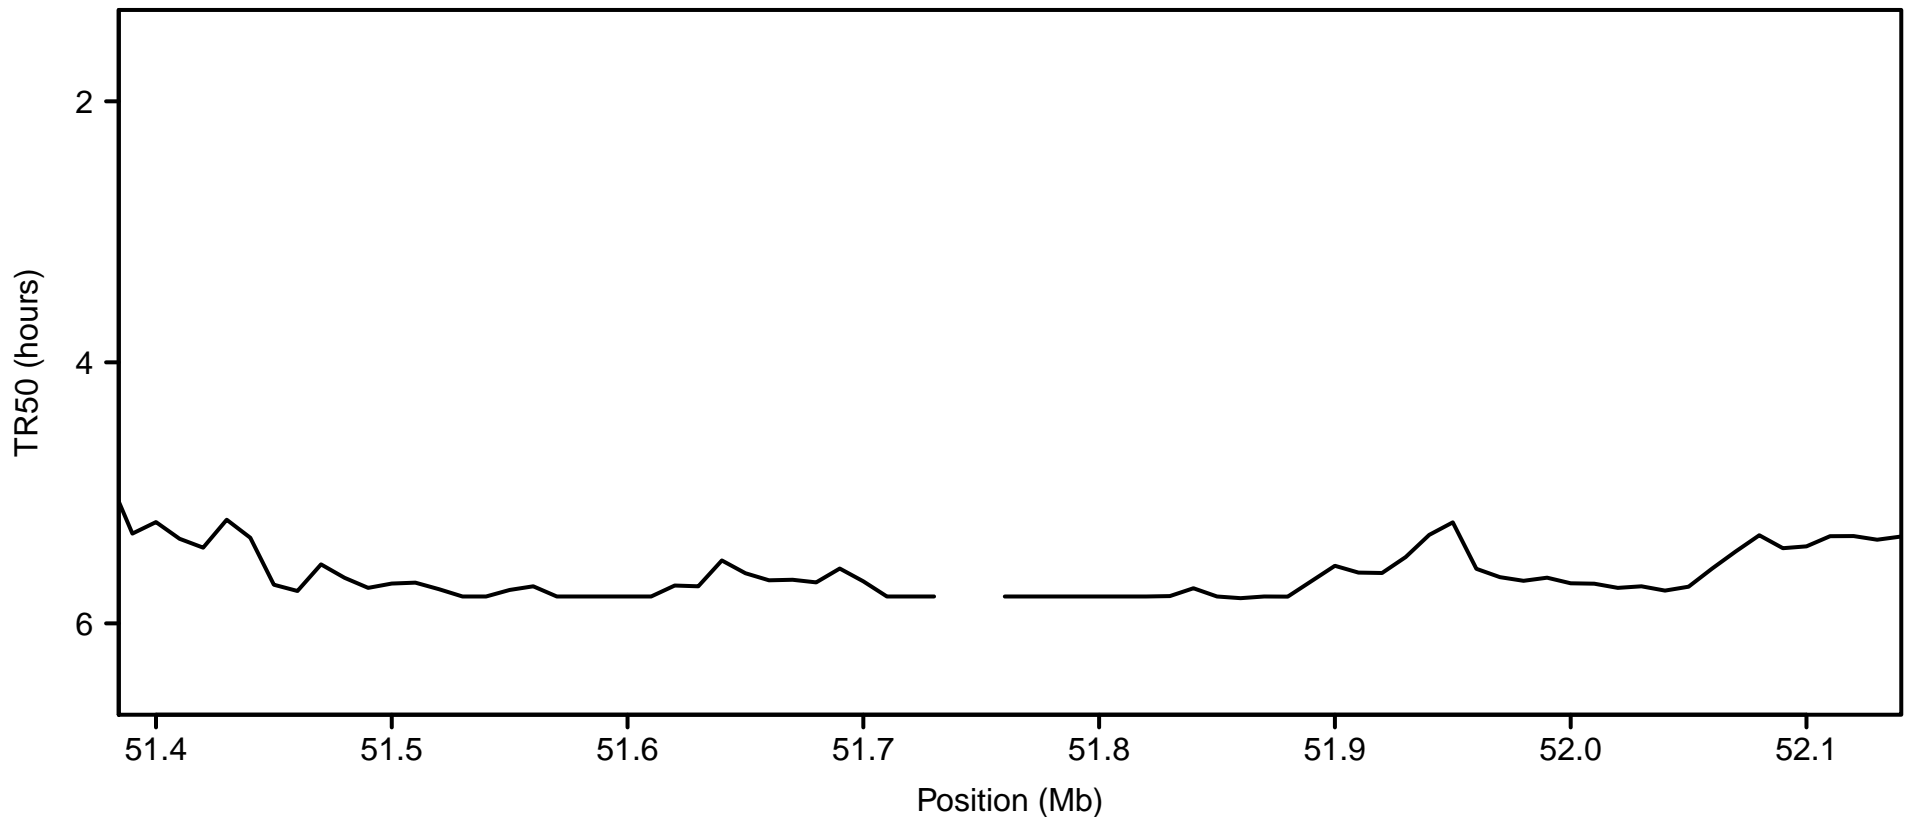

Apparent replication speed

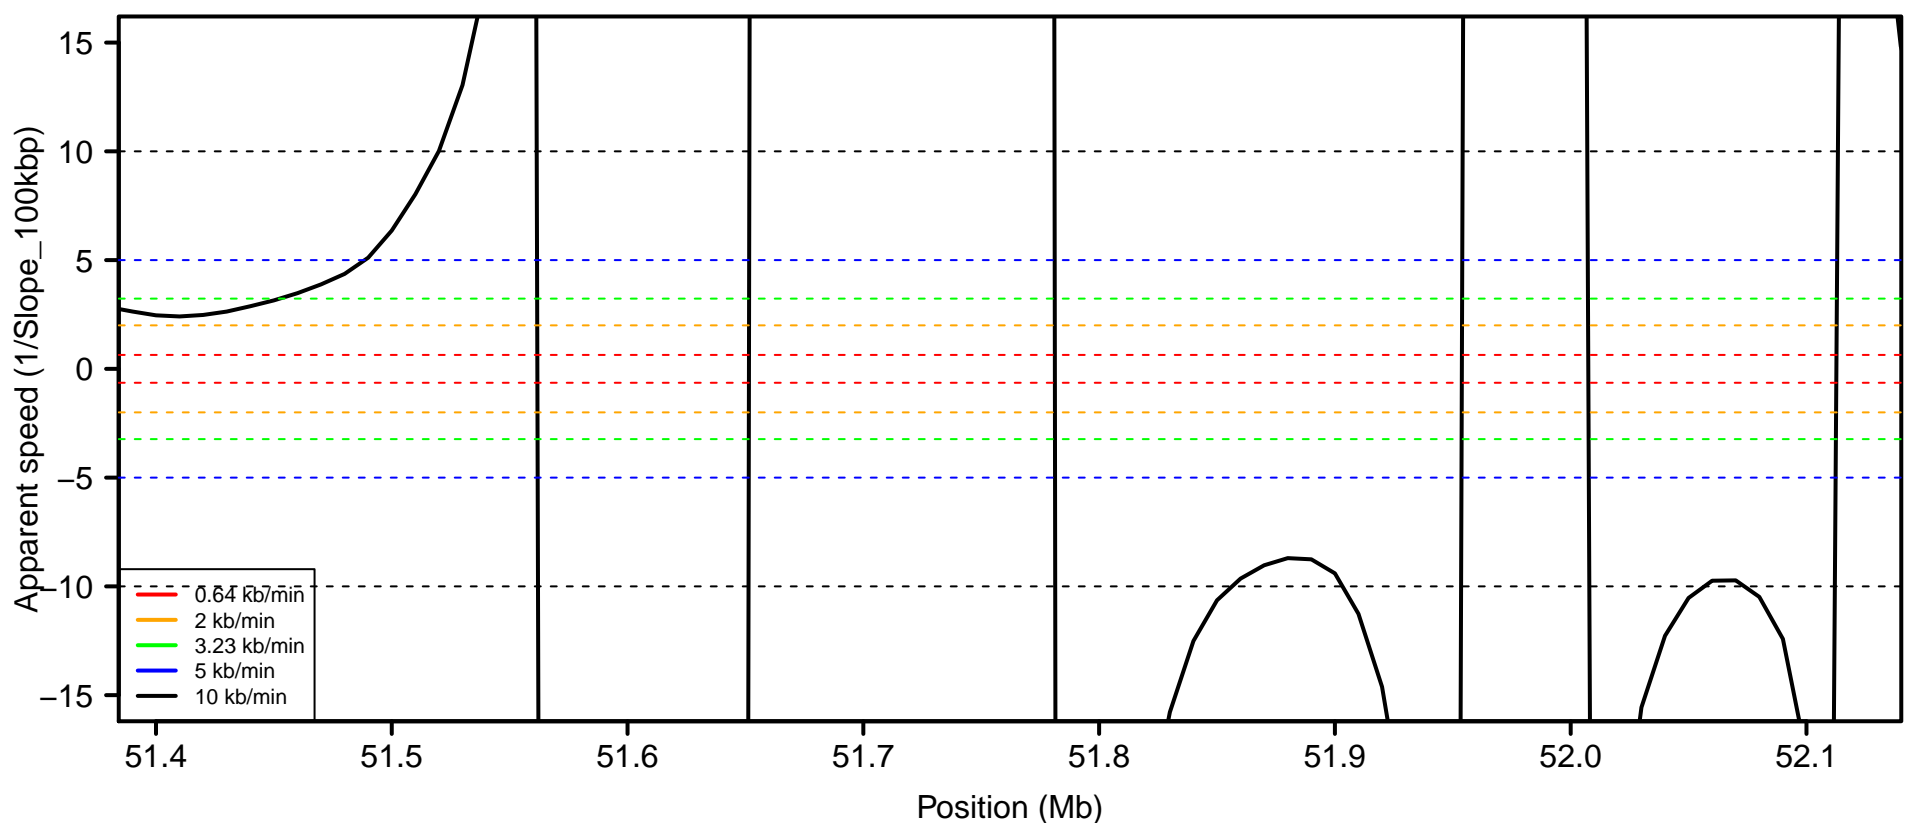

# Replication Timing Vs Encode Origin data, ENr121 (chr2:118011043\_118511043)

Annotation

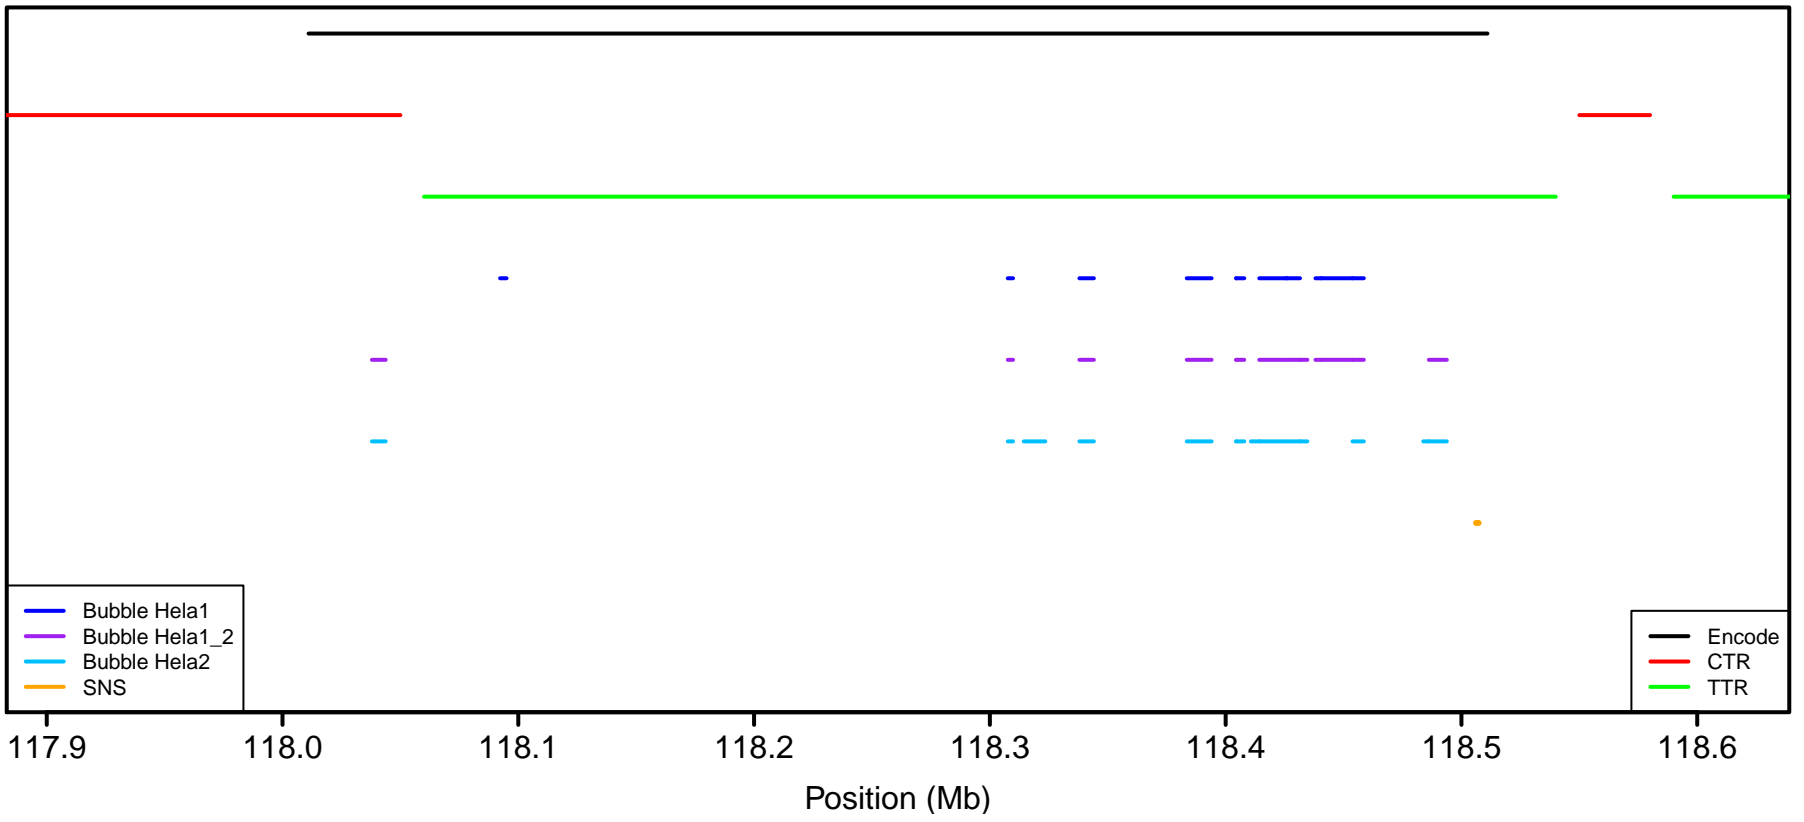

Timing of HeLa

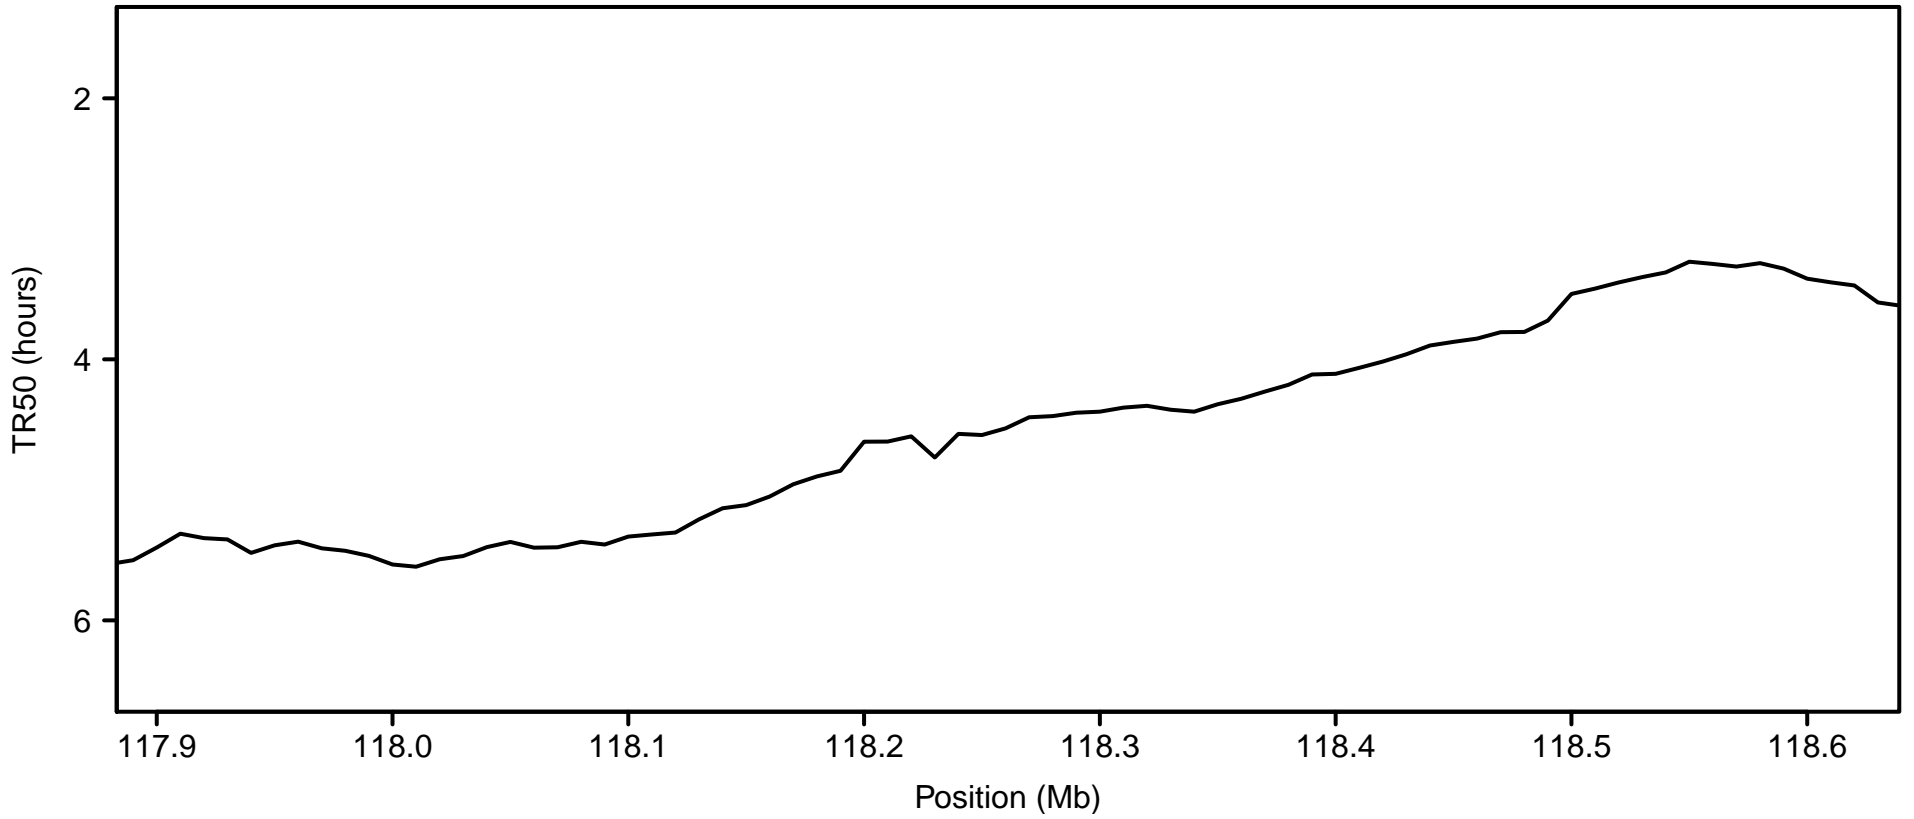

Apparent replication speed

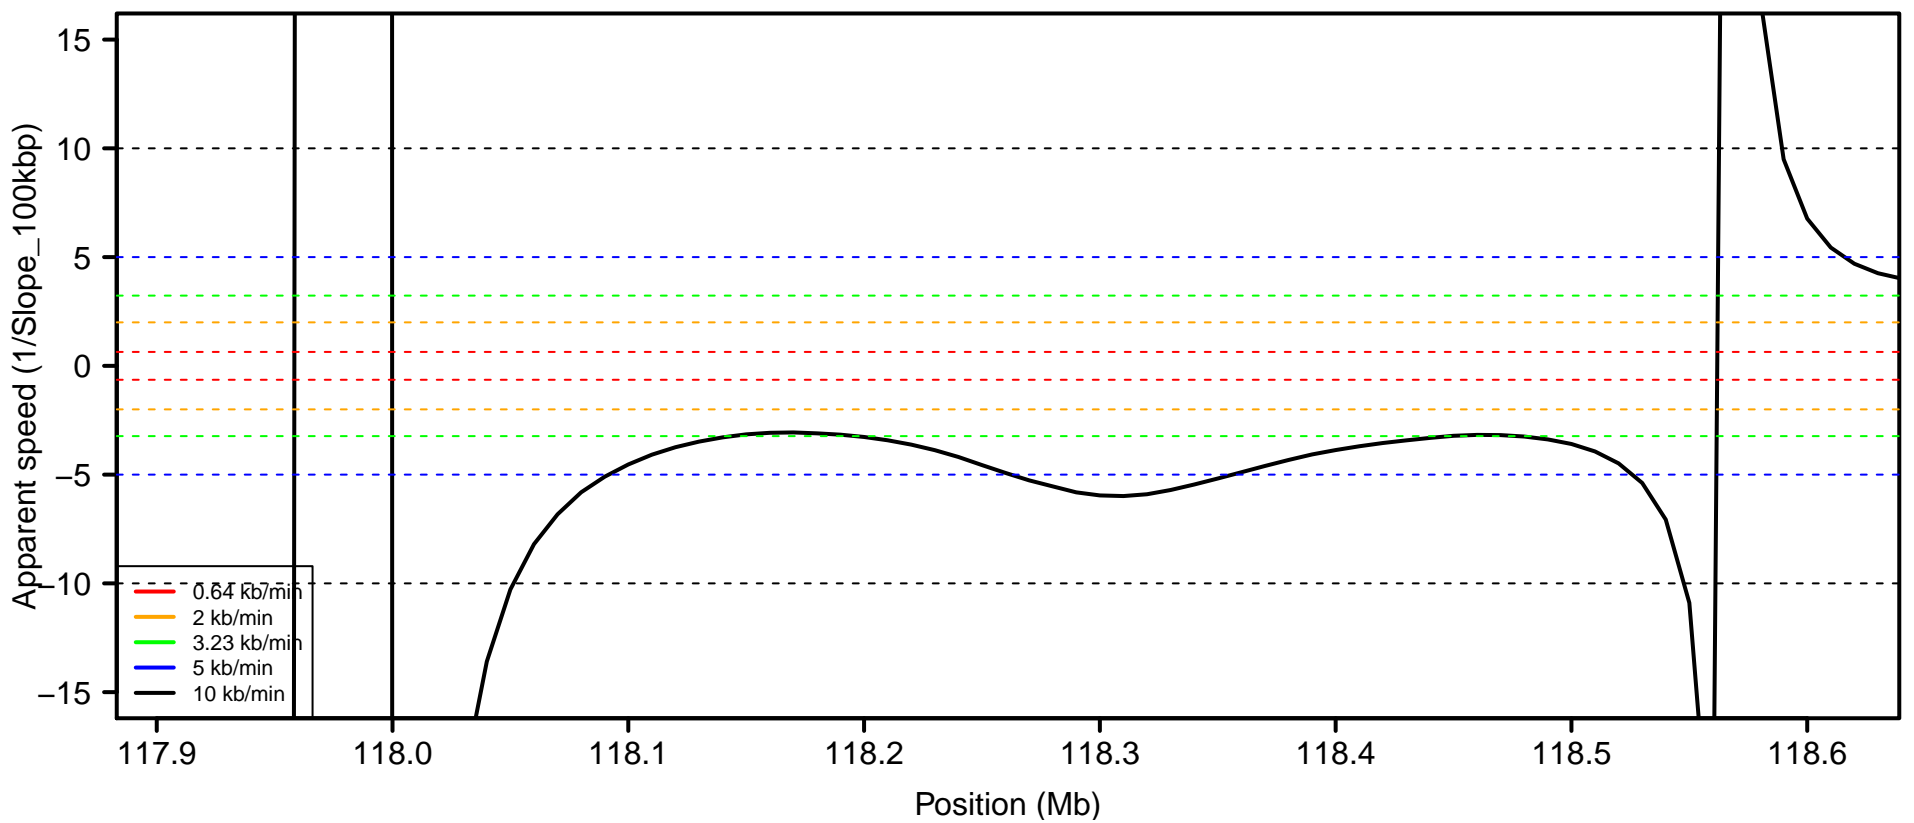

# Replication Timing Vs Encode Origin data, ENr331 (chr2:219985589\_220485589)

Annotation

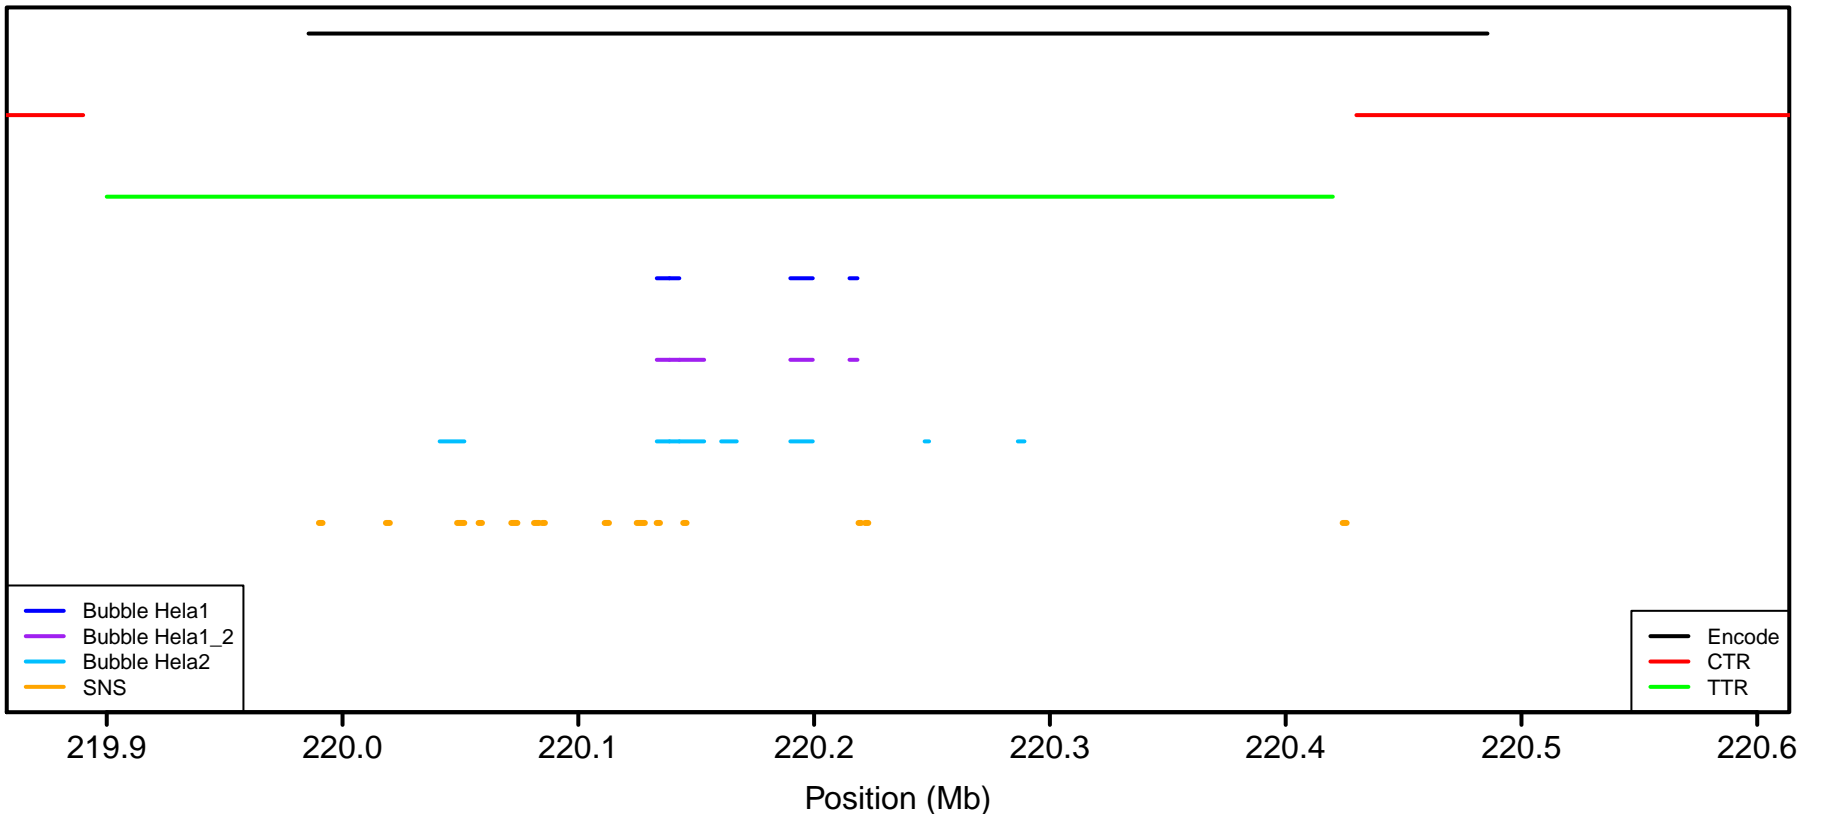

Timing of HeLa

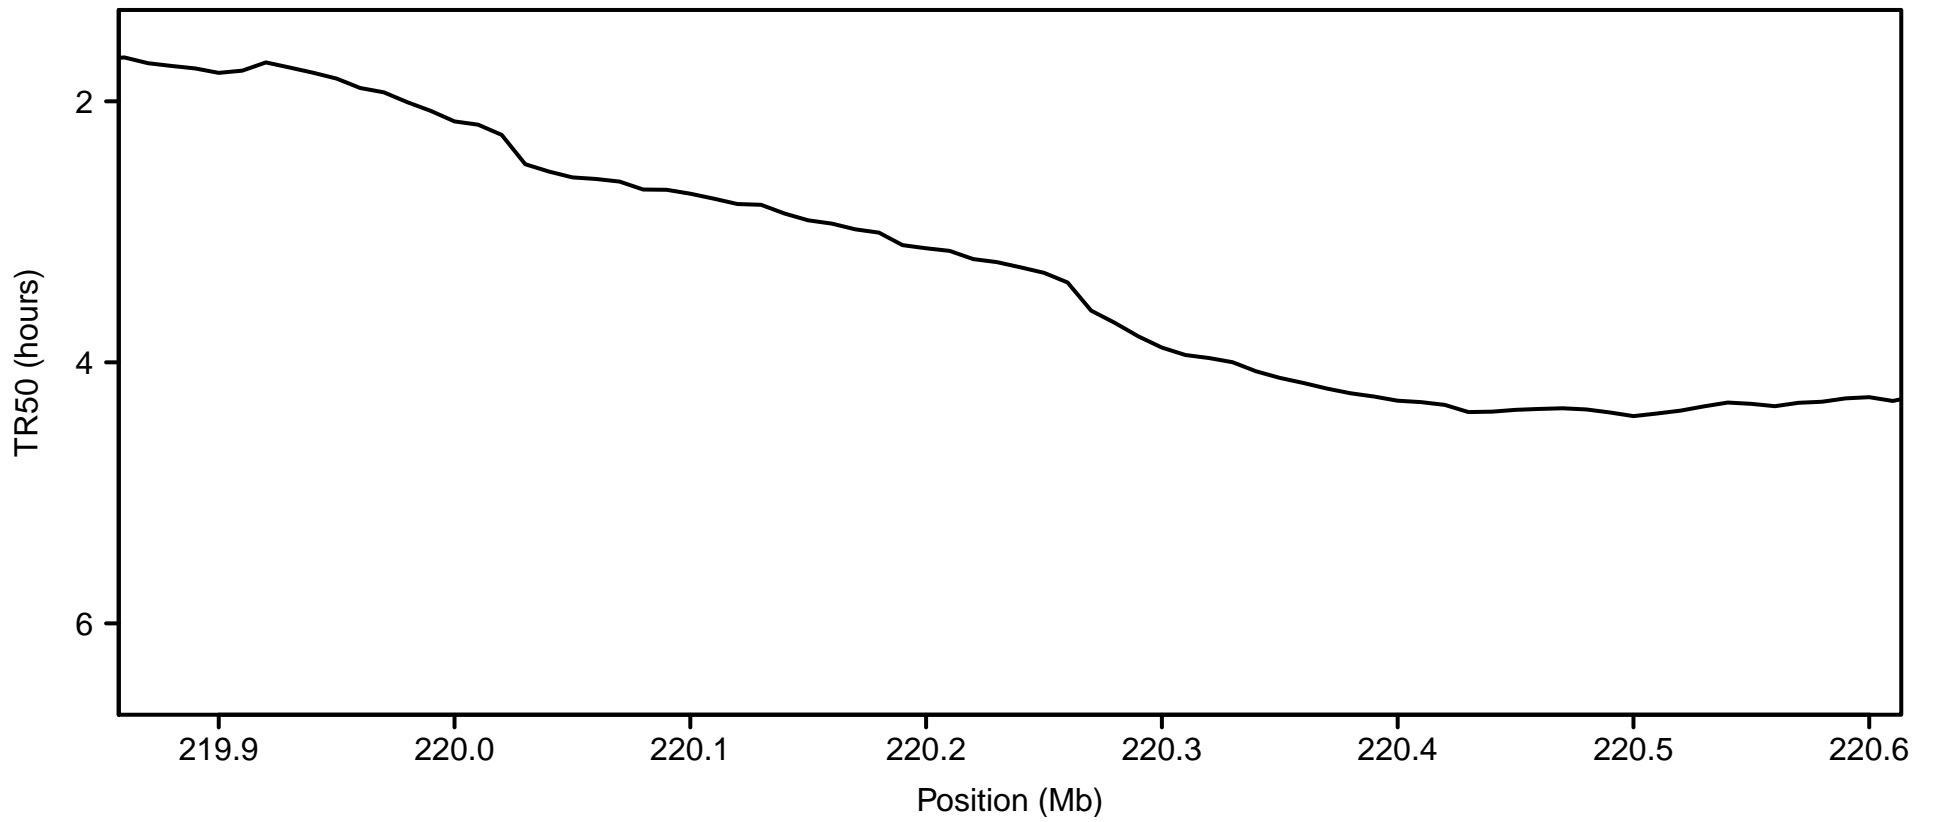

Apparent replication speed

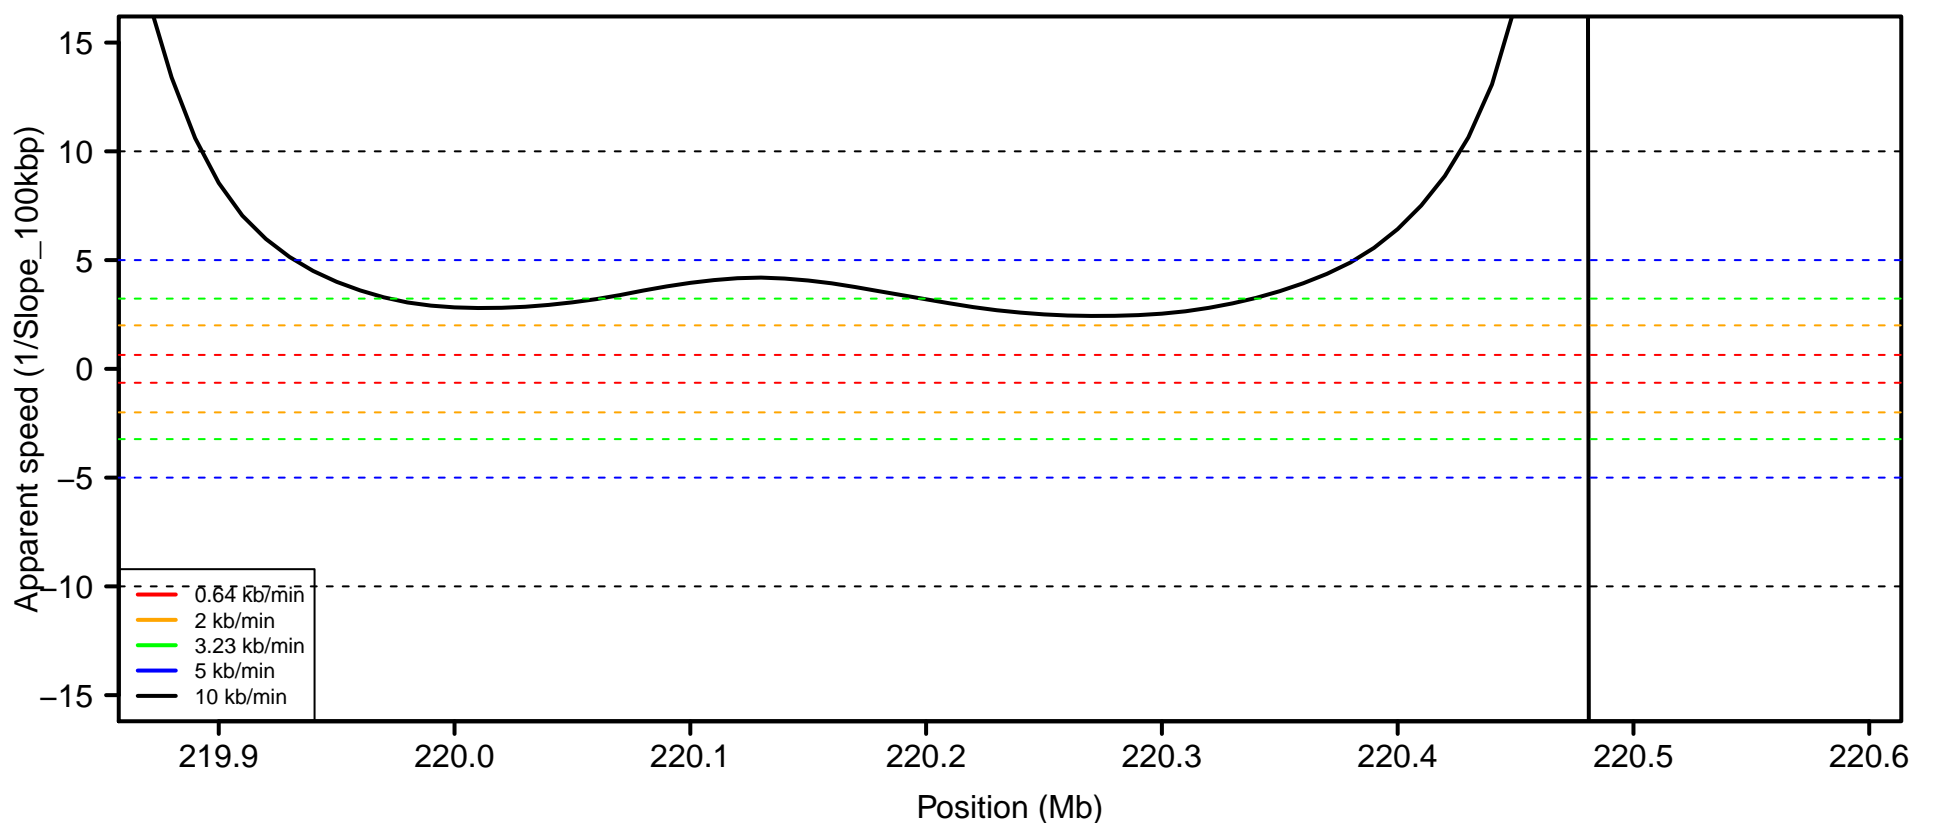

# Replication Timing Vs Encode Origin data, ENr131 (chr2:234156563\_234656627)

Annotation

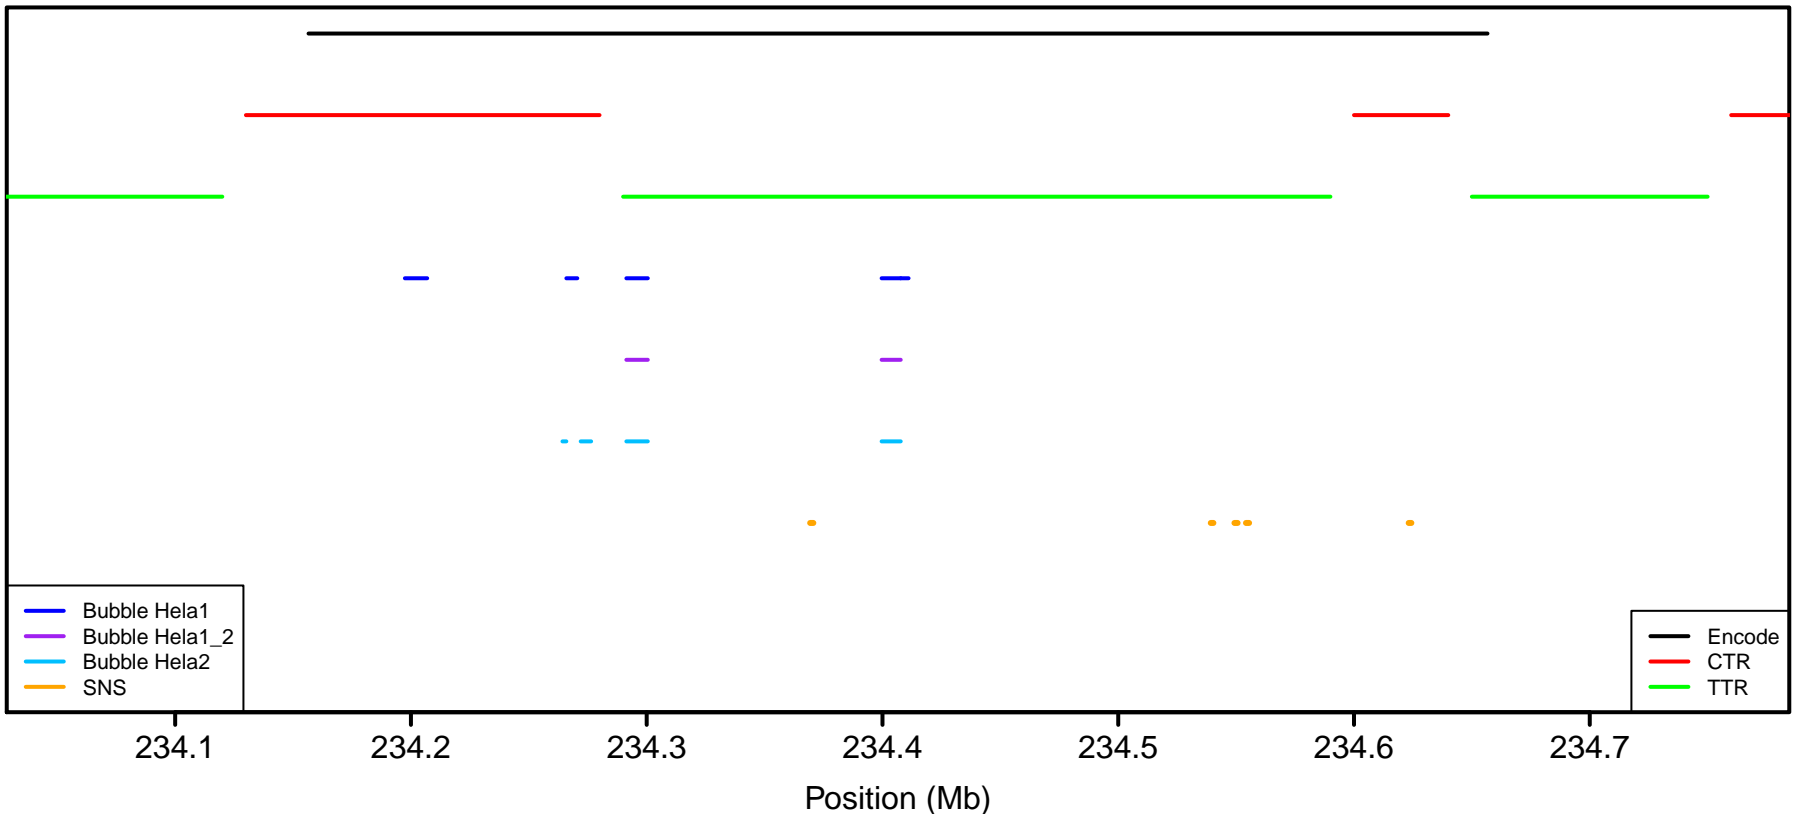

Timing of Hela

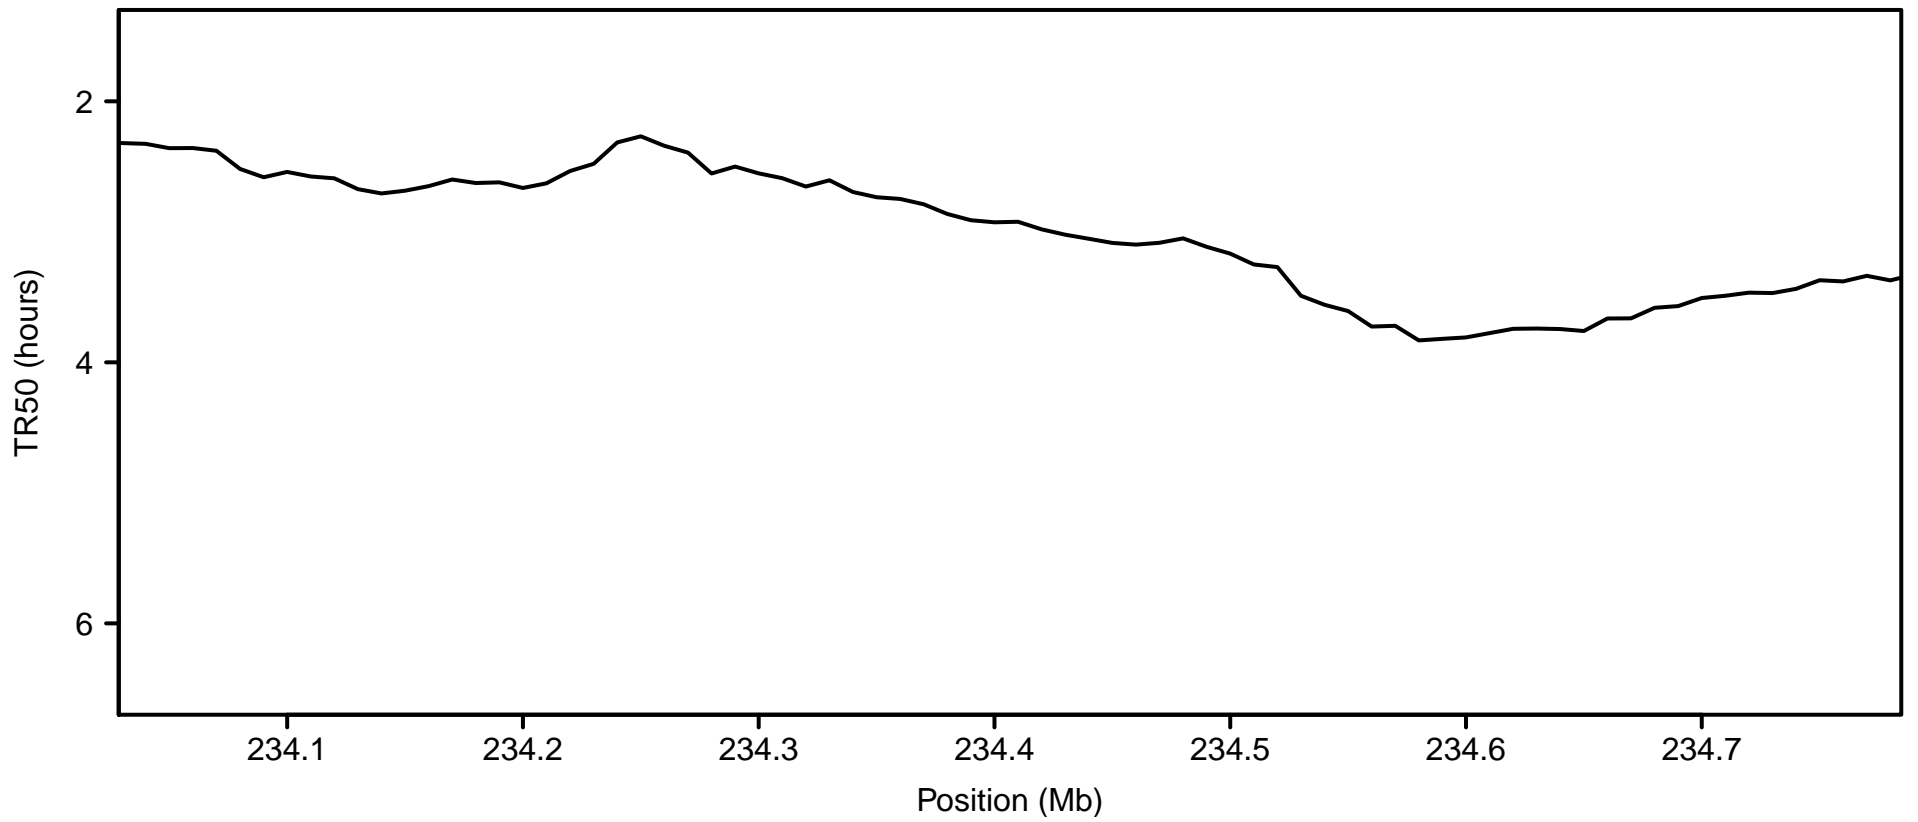

Apparent replication speed

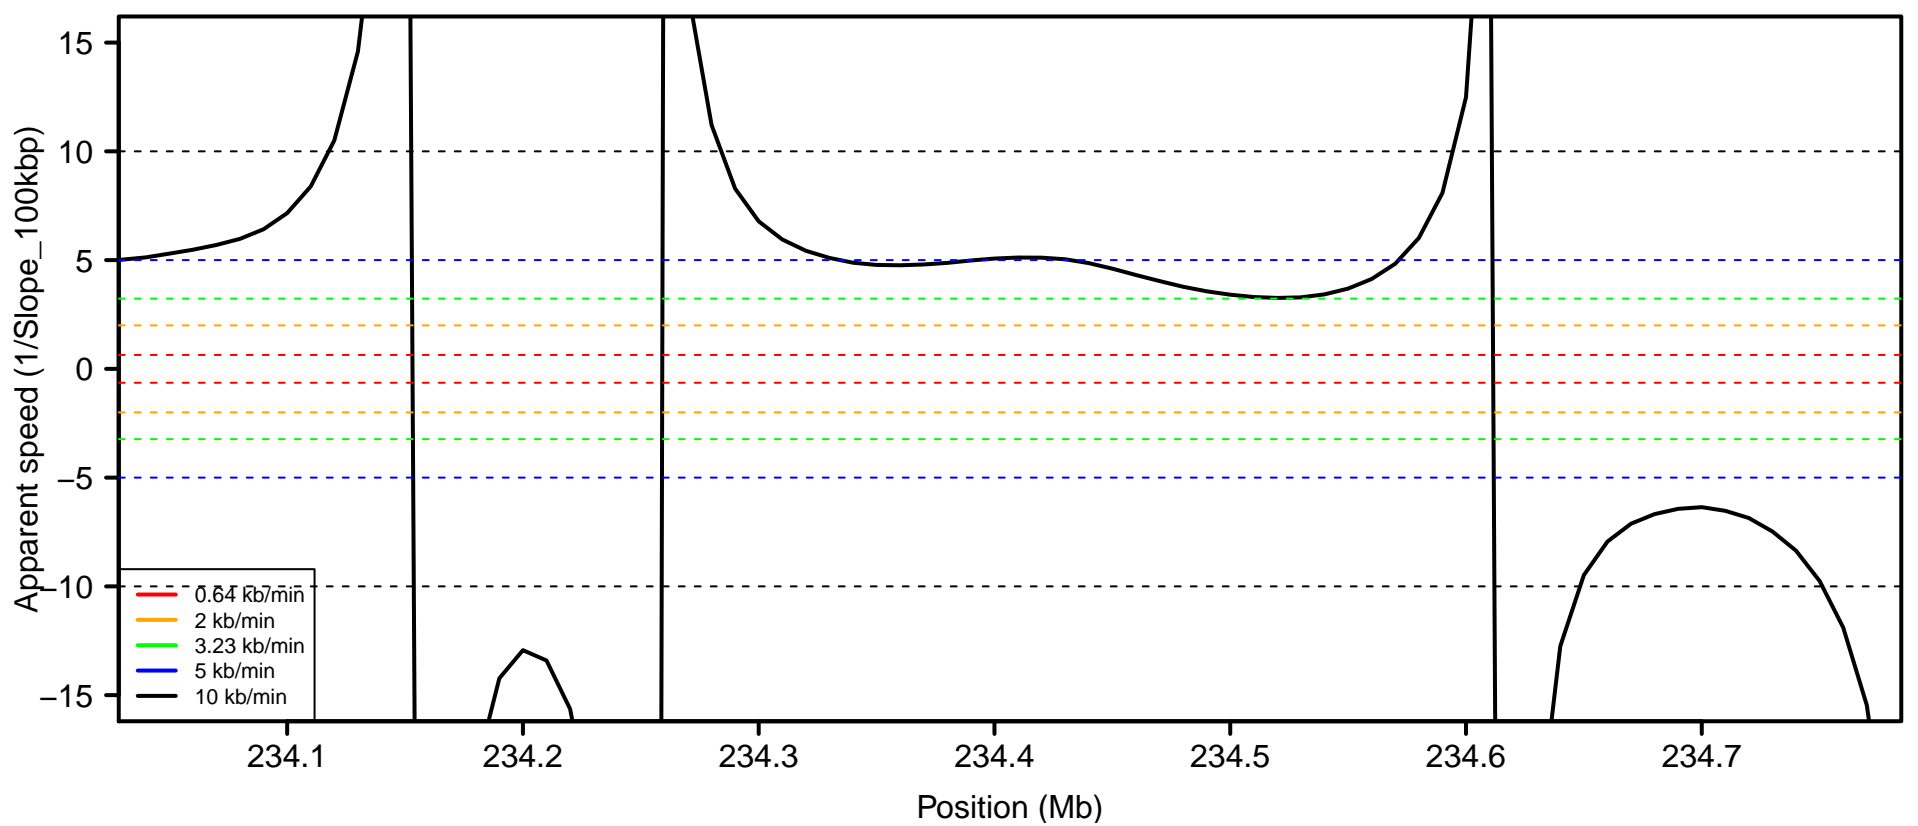

# Replication Timing Vs Encode Origin data, ENr113 (chr4:118466103\_118966103)

Annotation

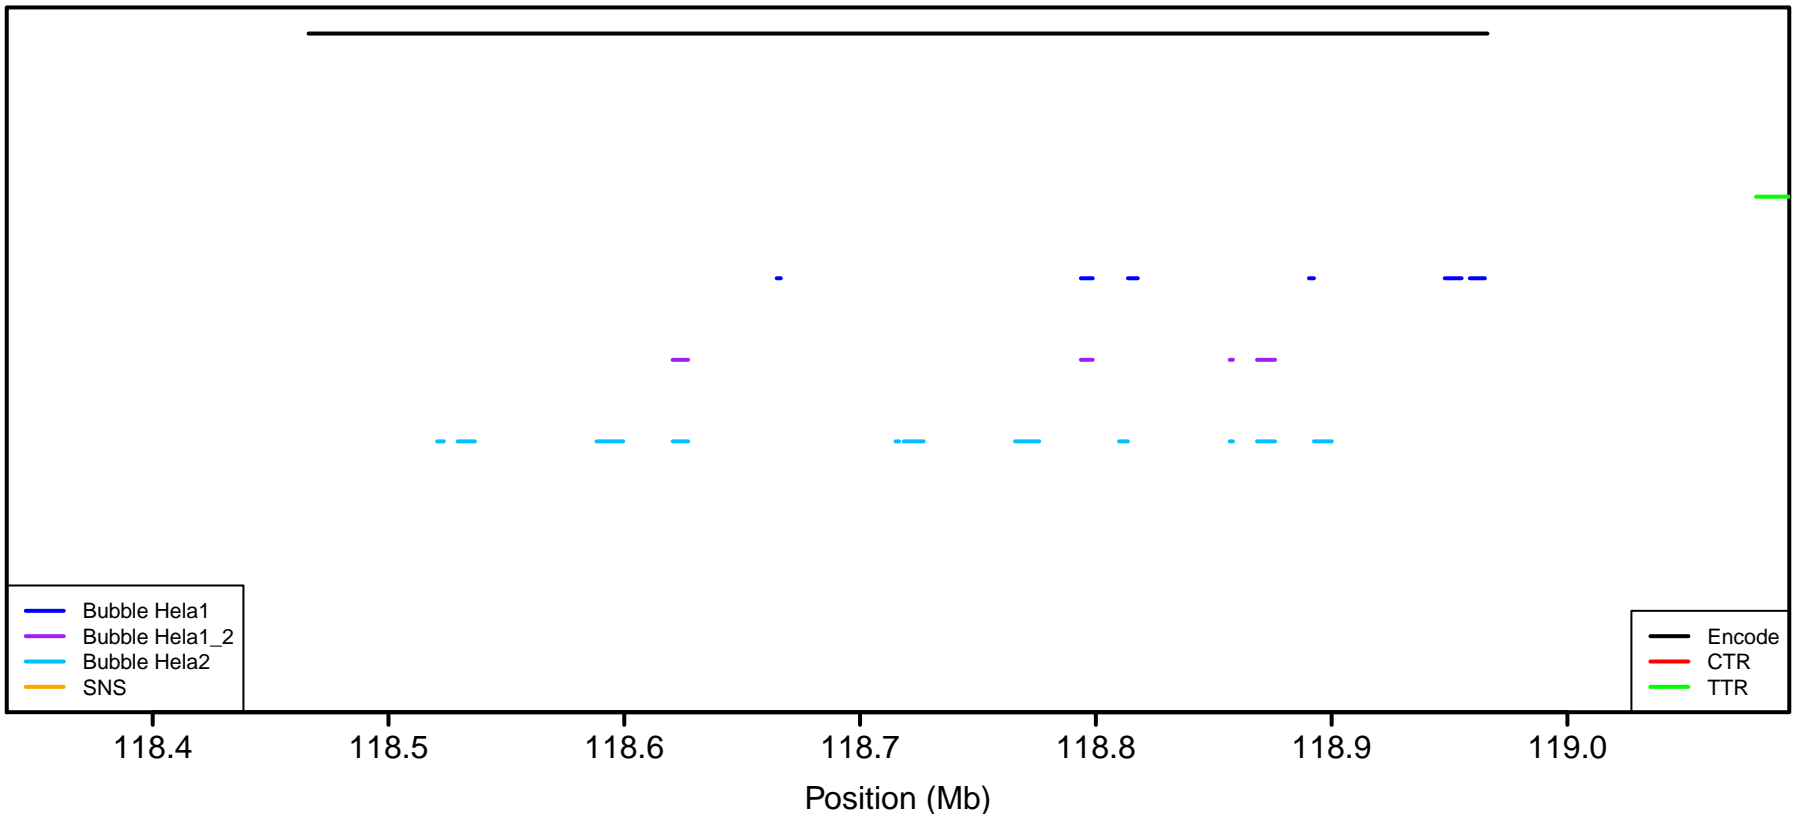

Timing of Hela

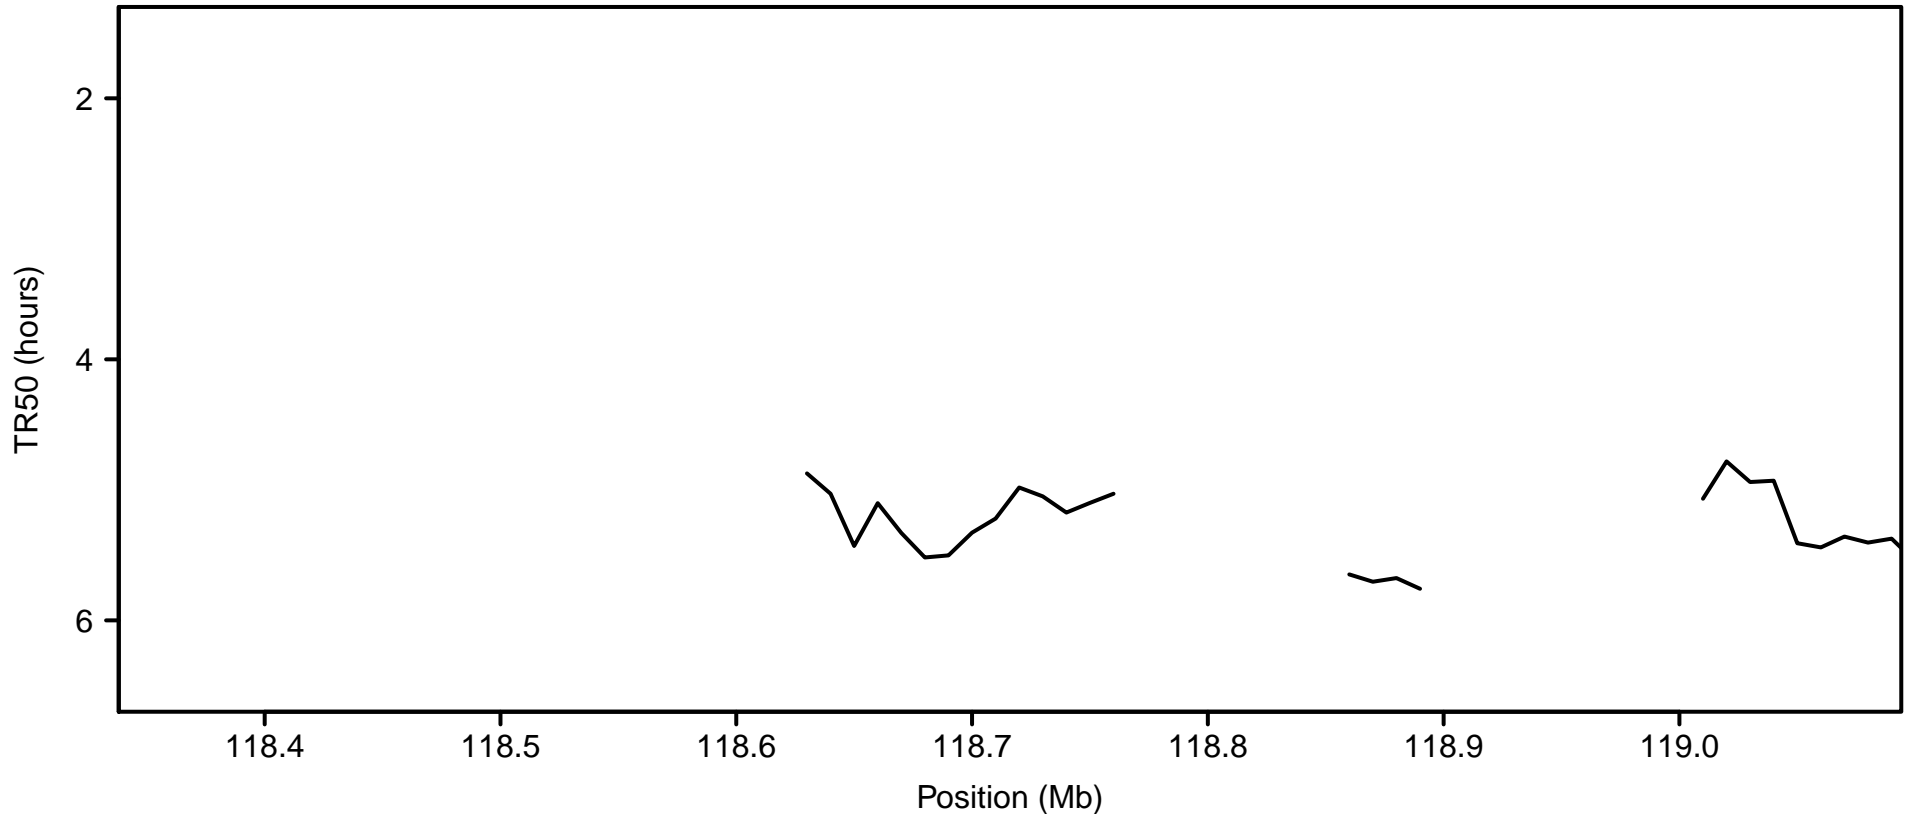

Apparent replication speed

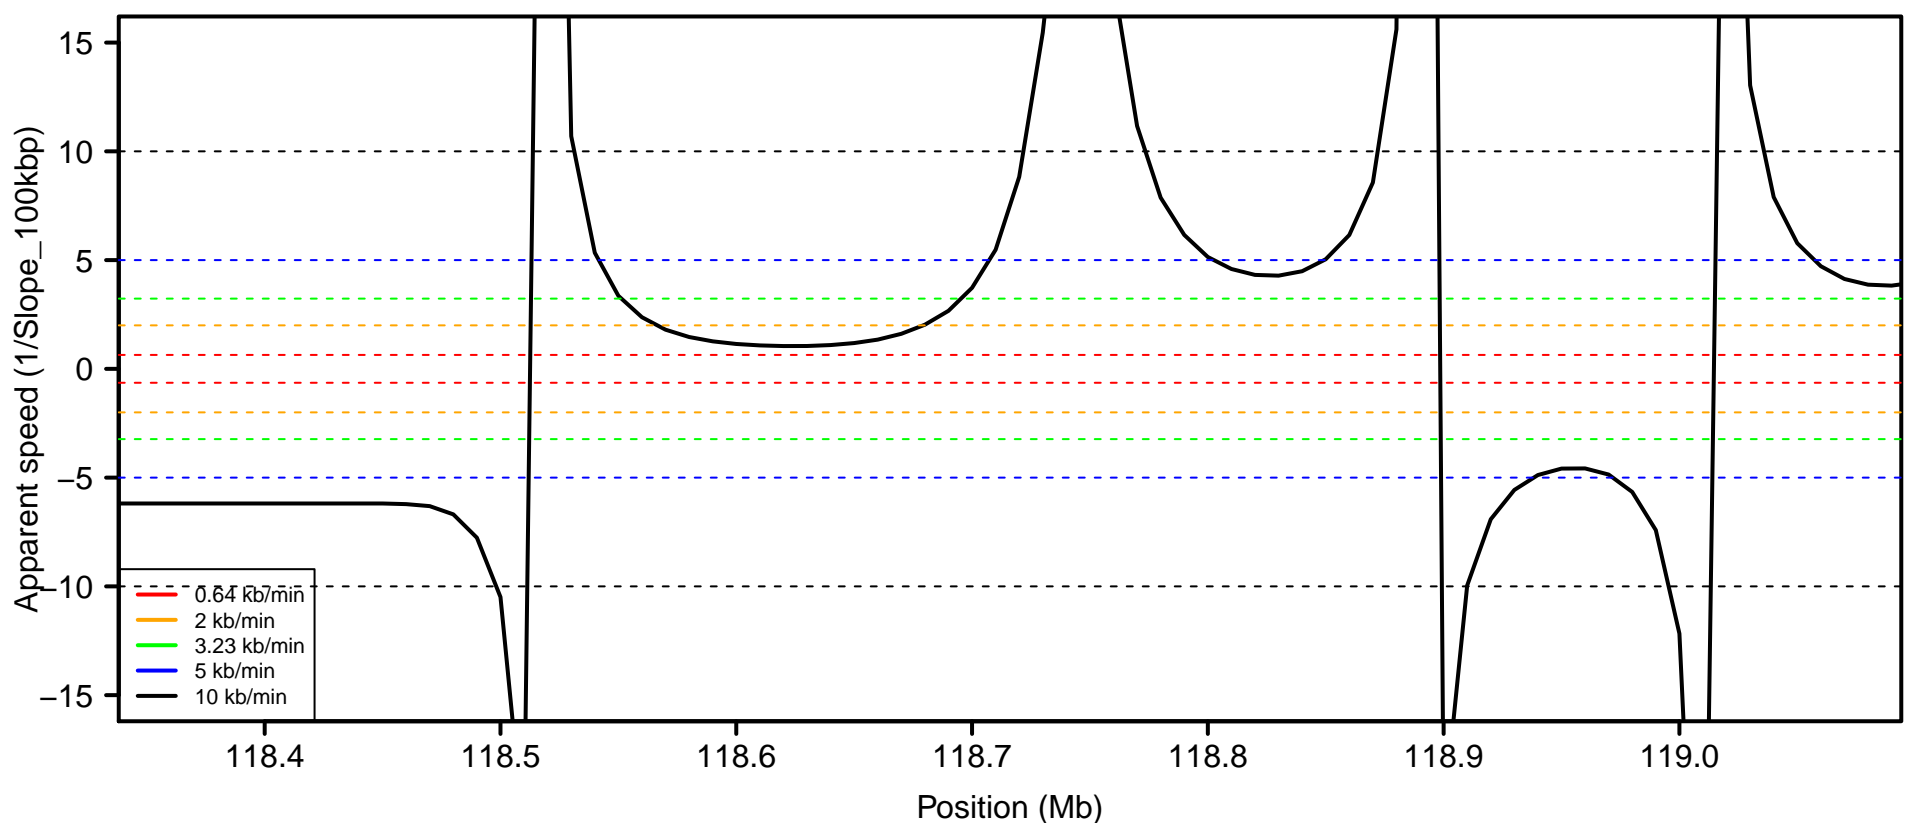

# Replication Timing Vs Encode Origin data, ENr221 (chr5:55871006\_56371006)

Annotation

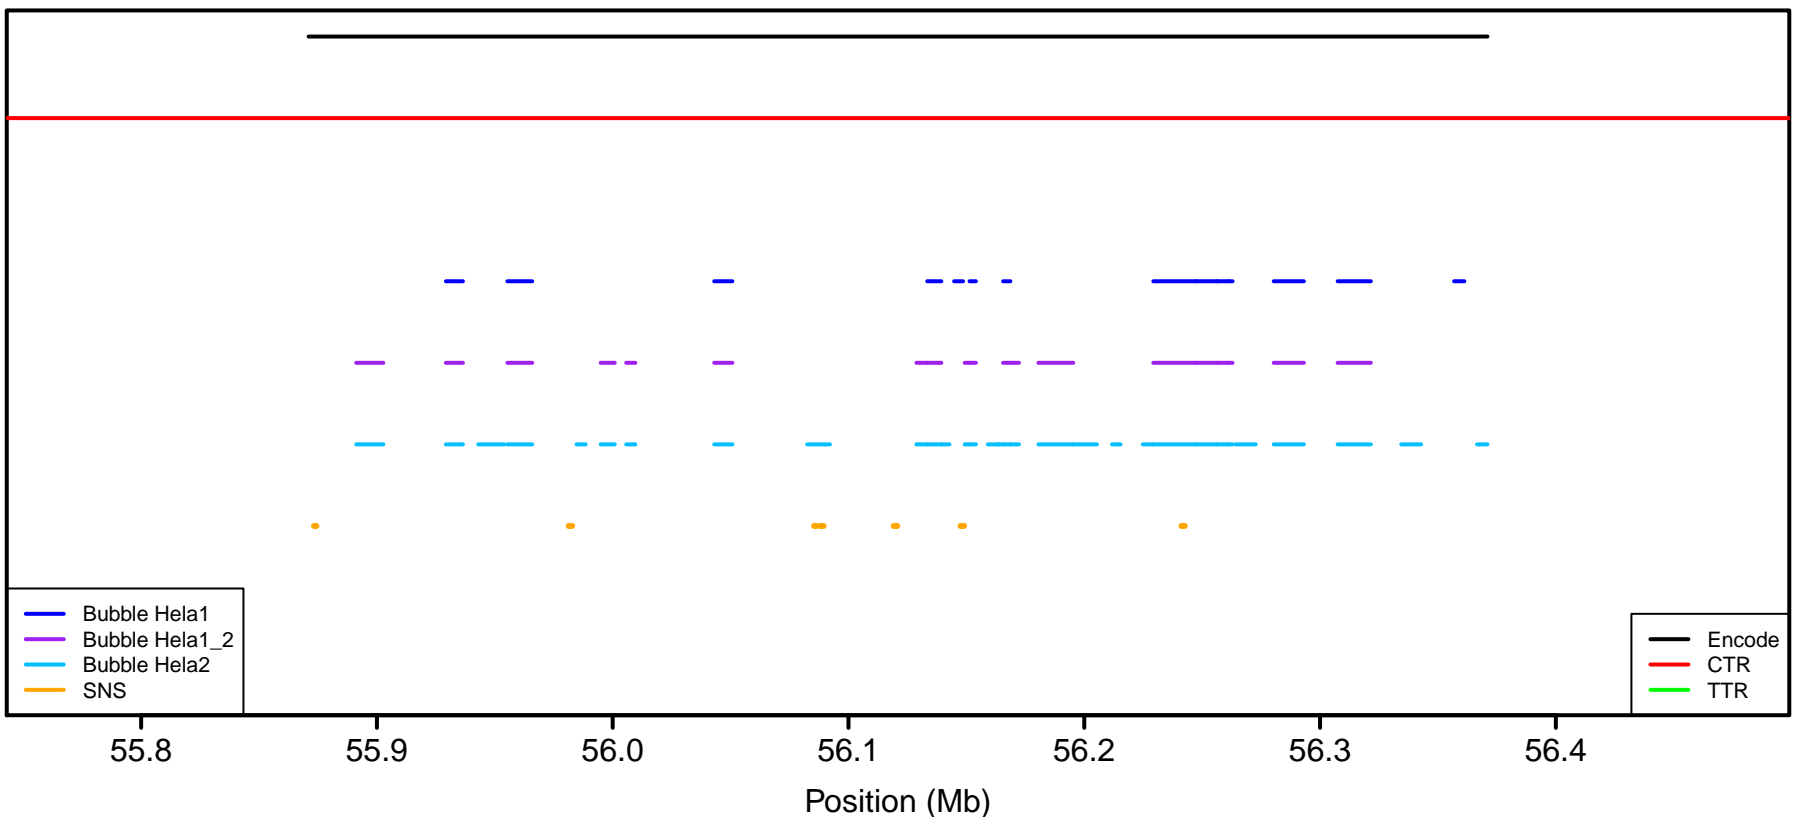

Timing of HeLa

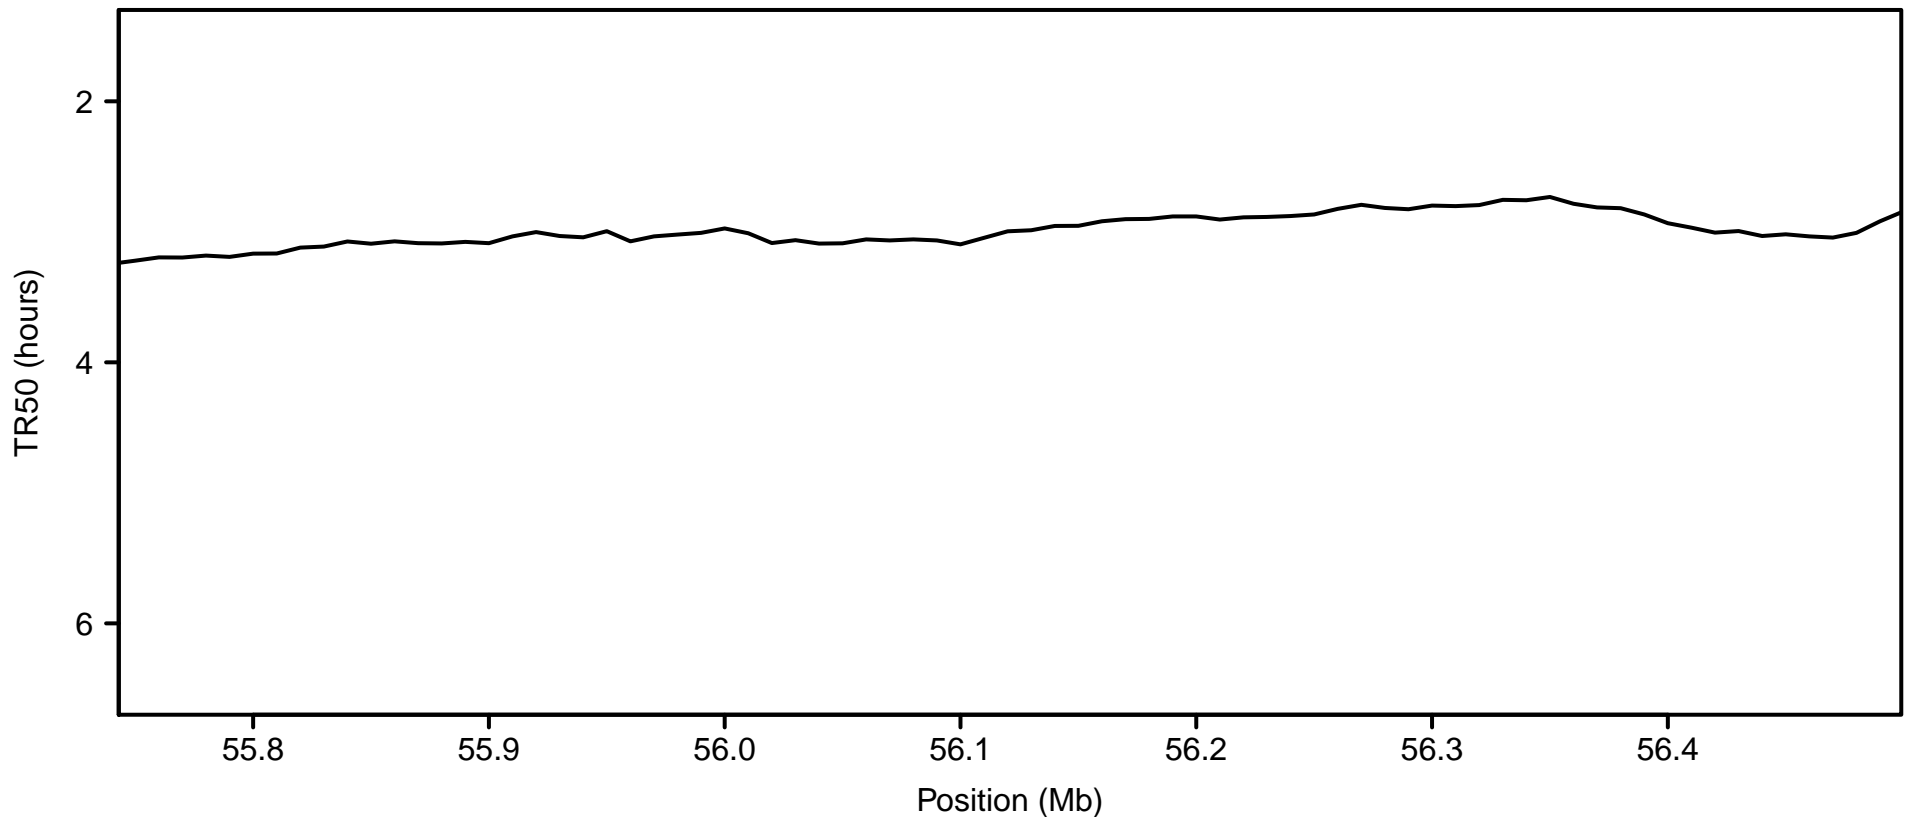

Apparent replication speed

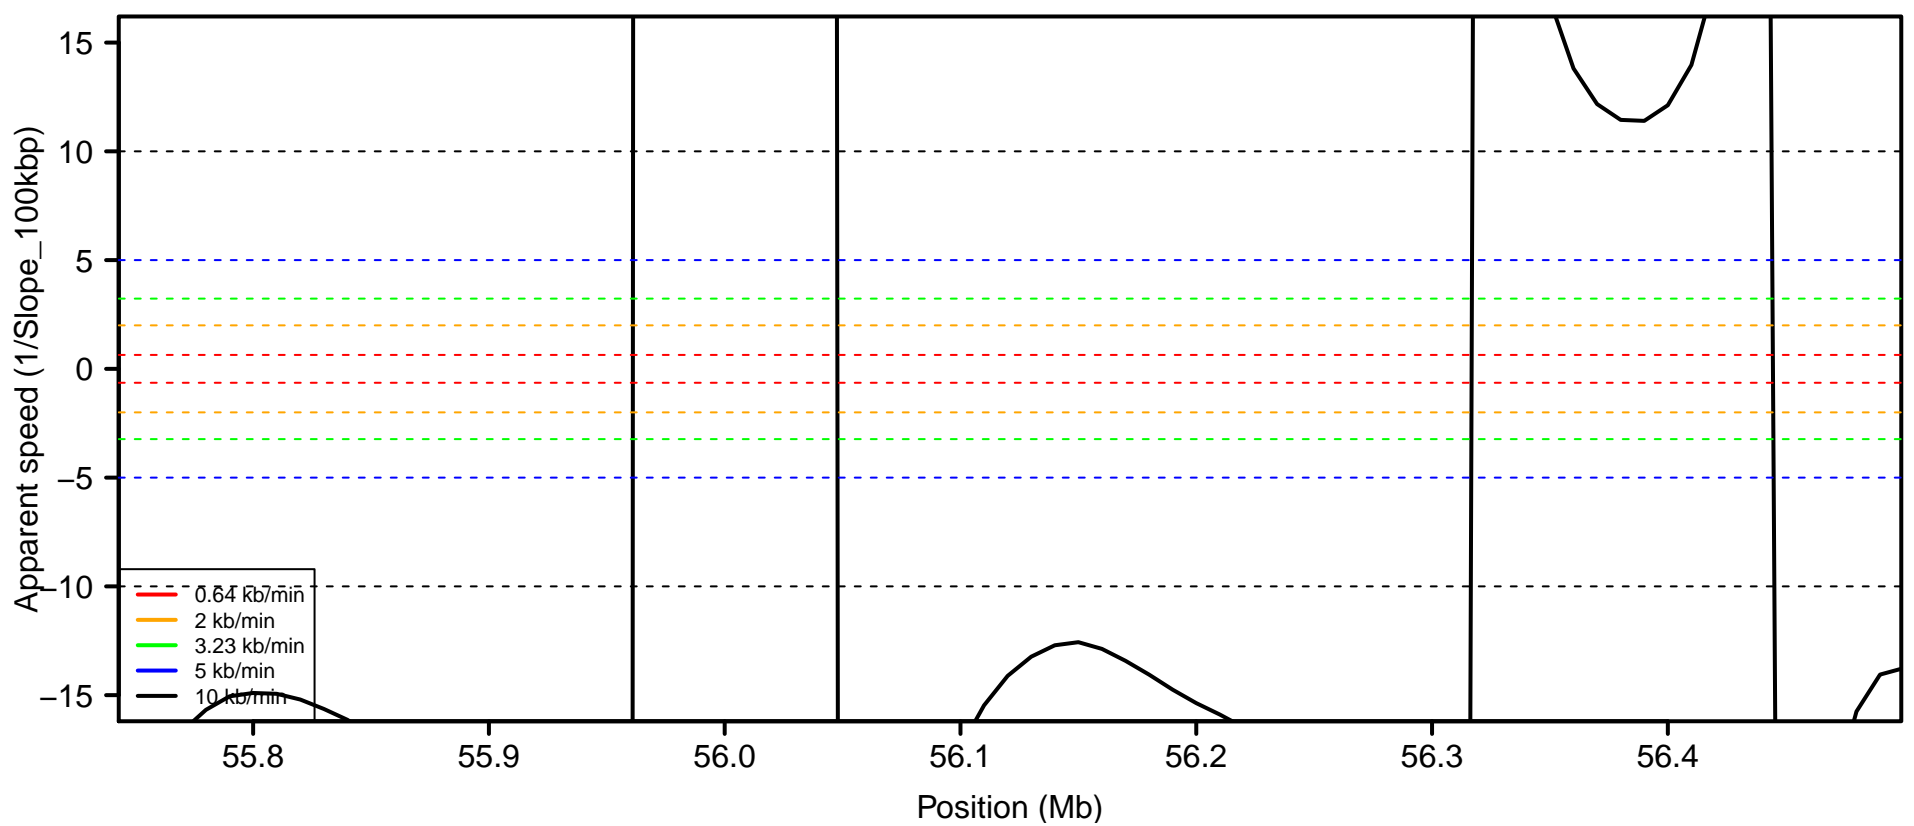

# Replication Timing Vs Encode Origin data, ENm002 (chr5:131284313\_132284313)

Annotation

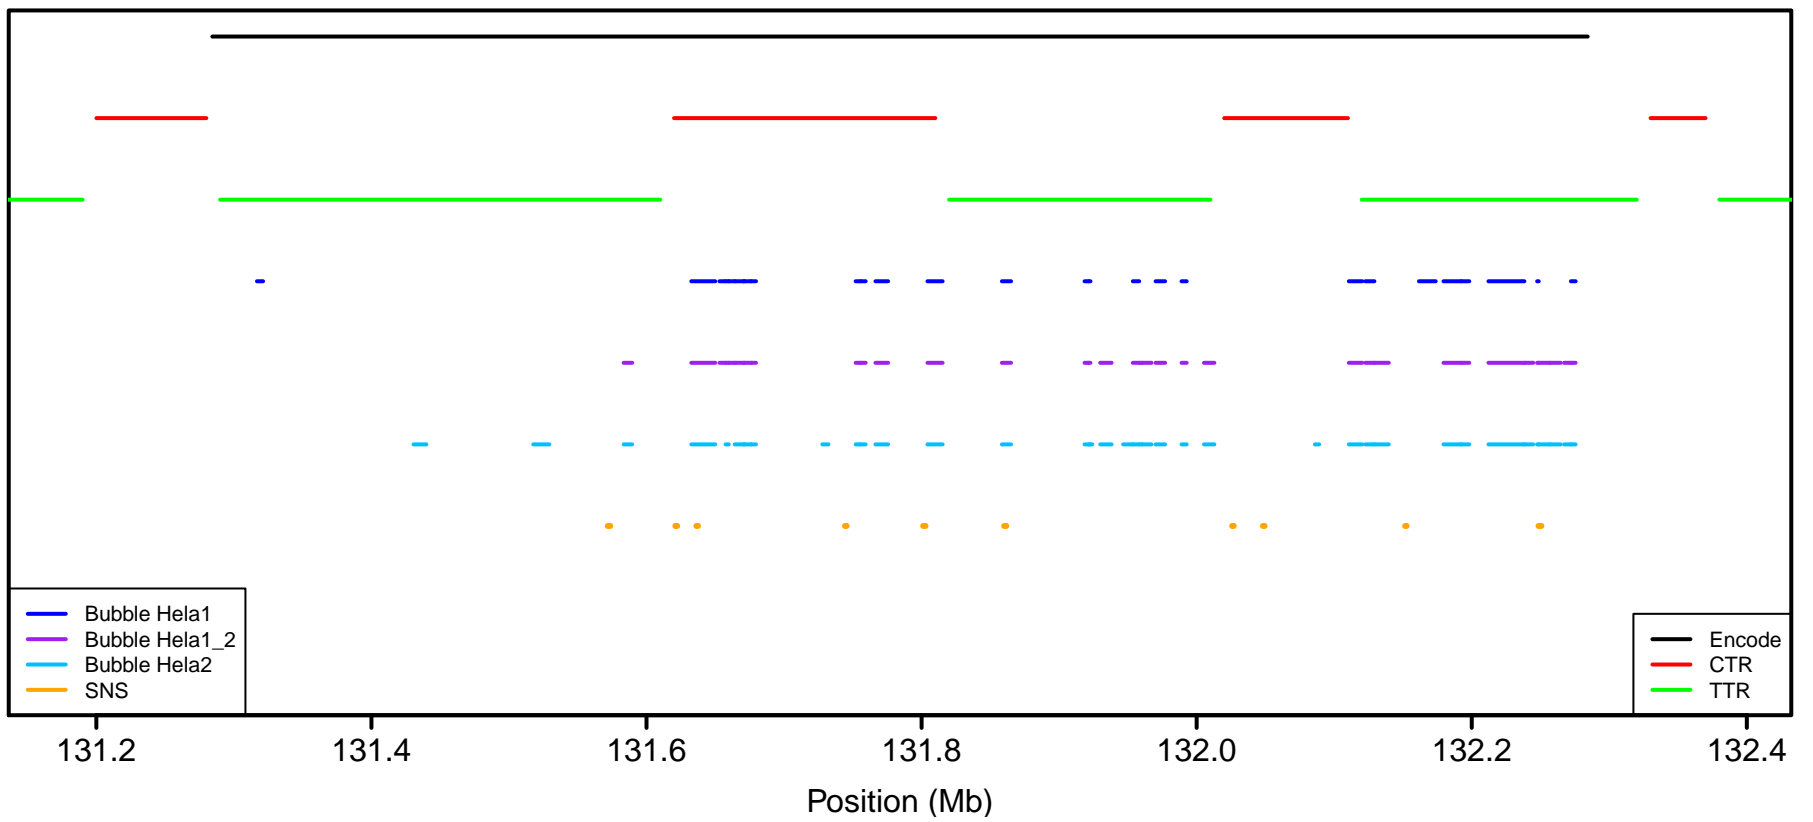

Timing of Hela

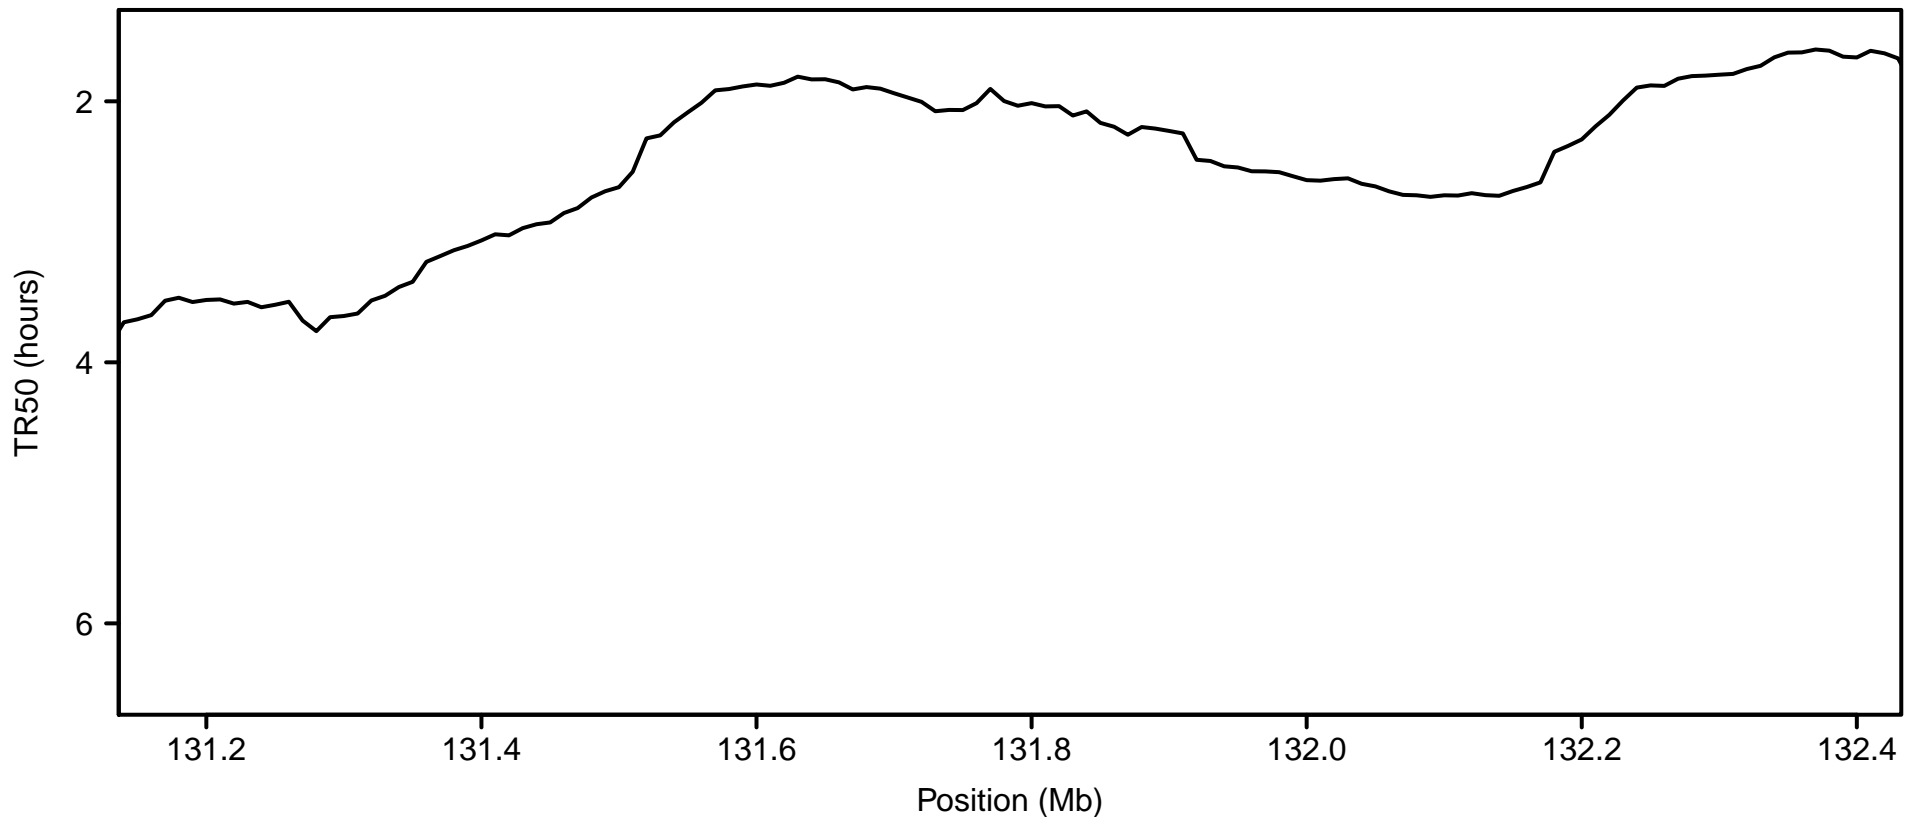

Apparent replication speed

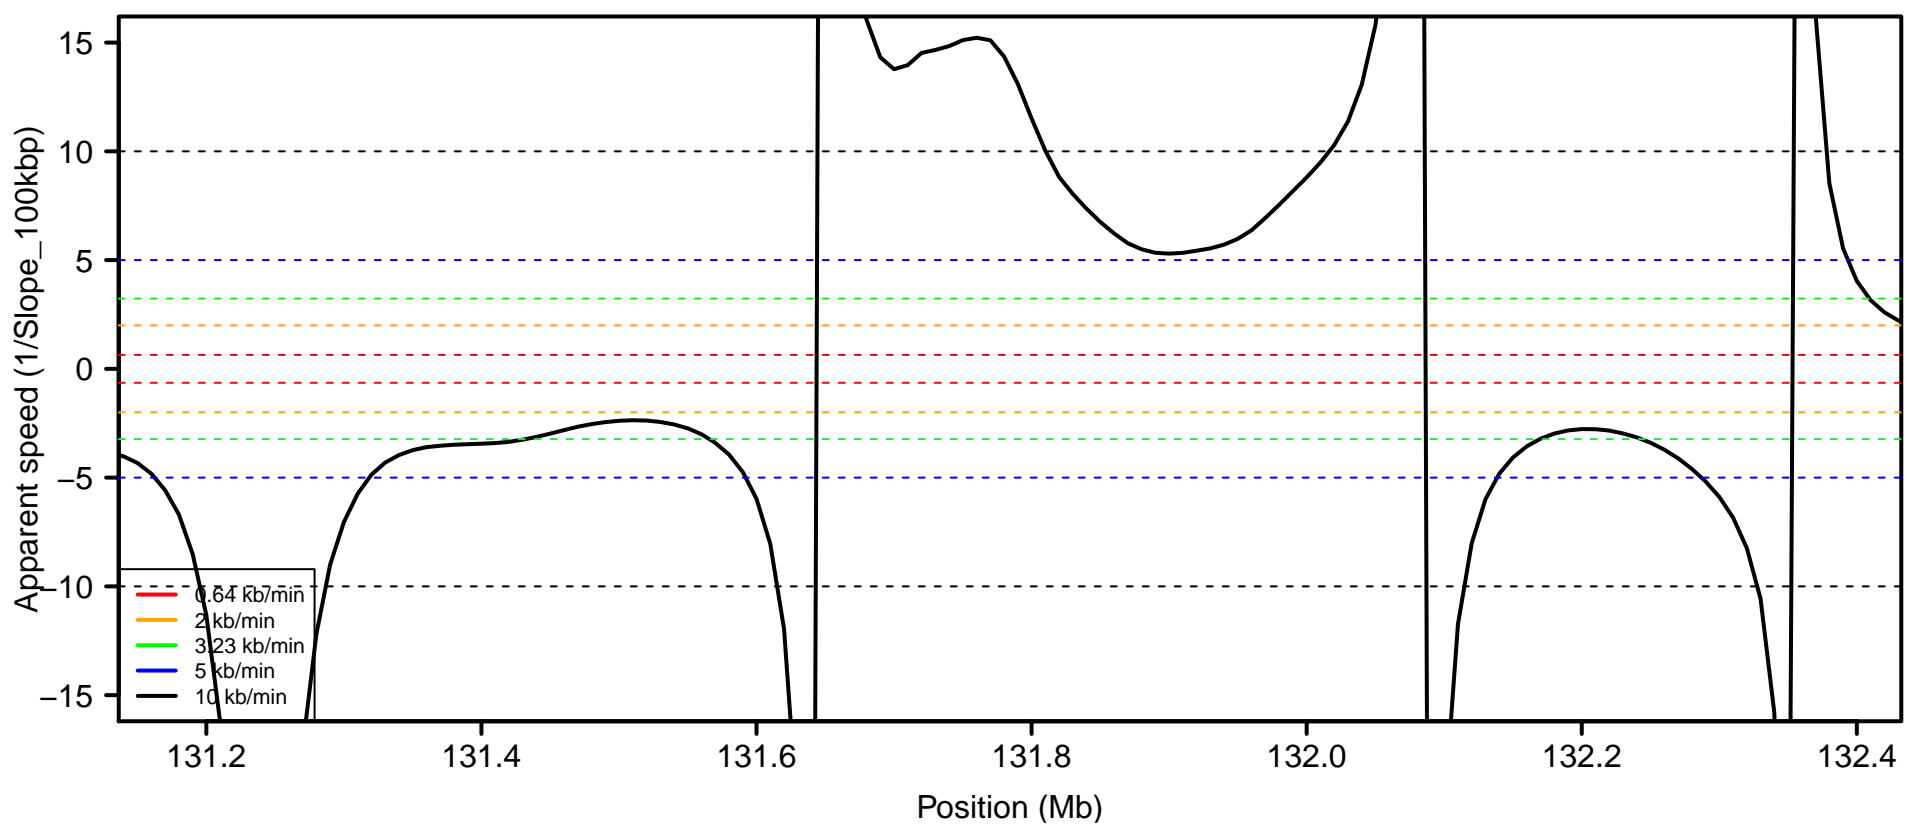



# Replication Timing Vs Encode Origin data, ENr212 (chr5:141880150\_142380150)

Annotation

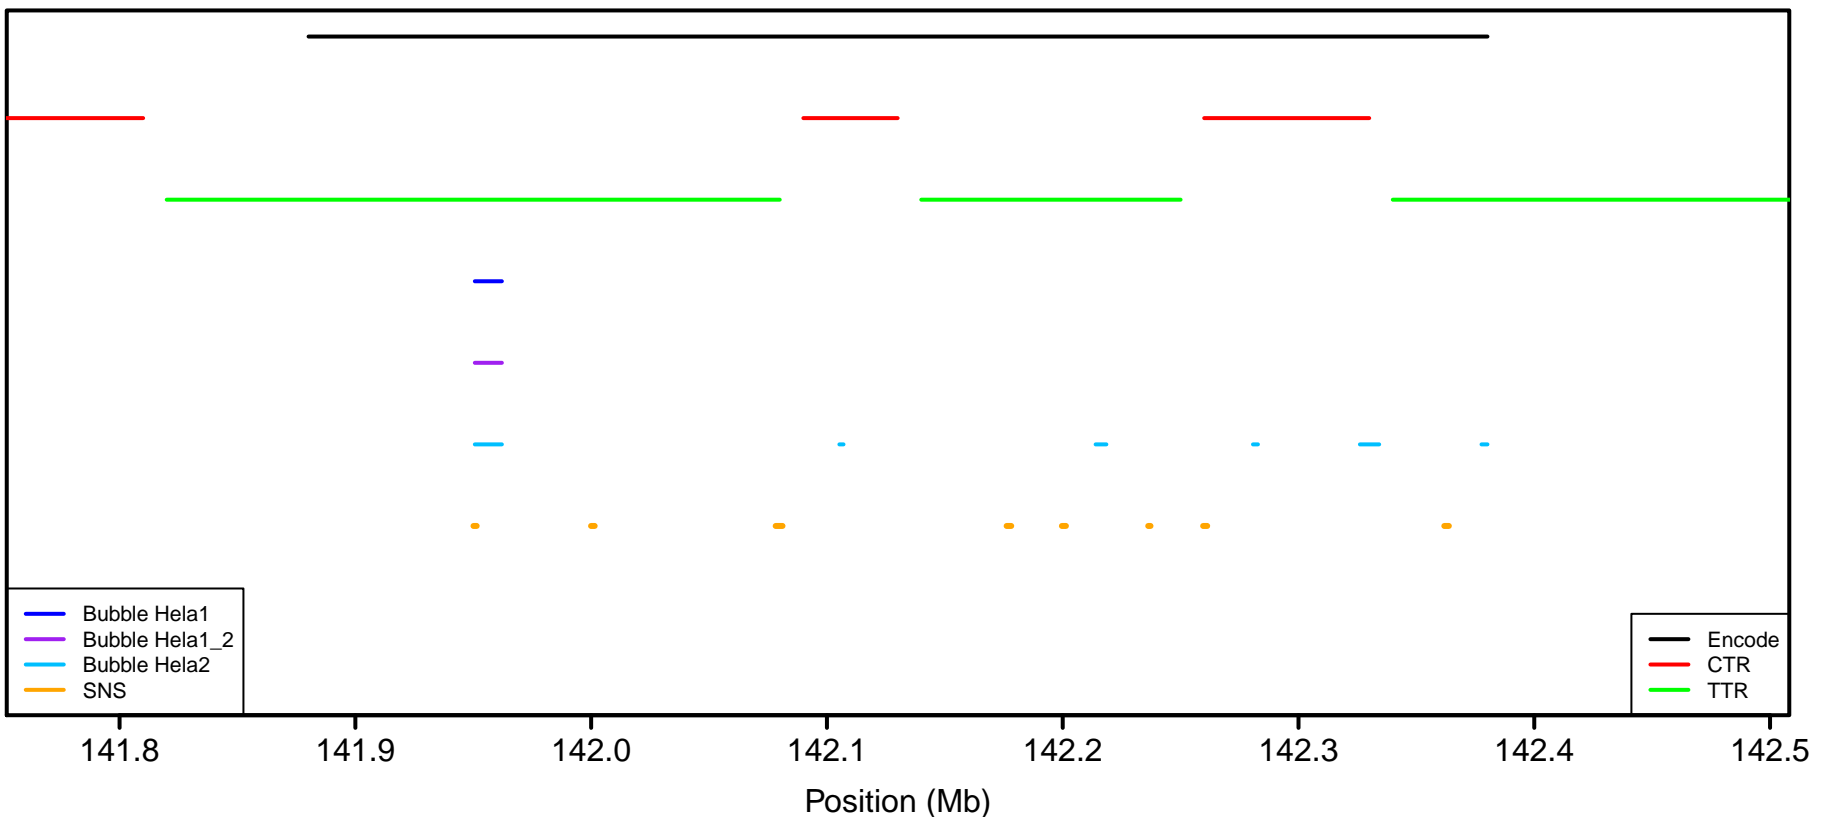

Timing of HeLa

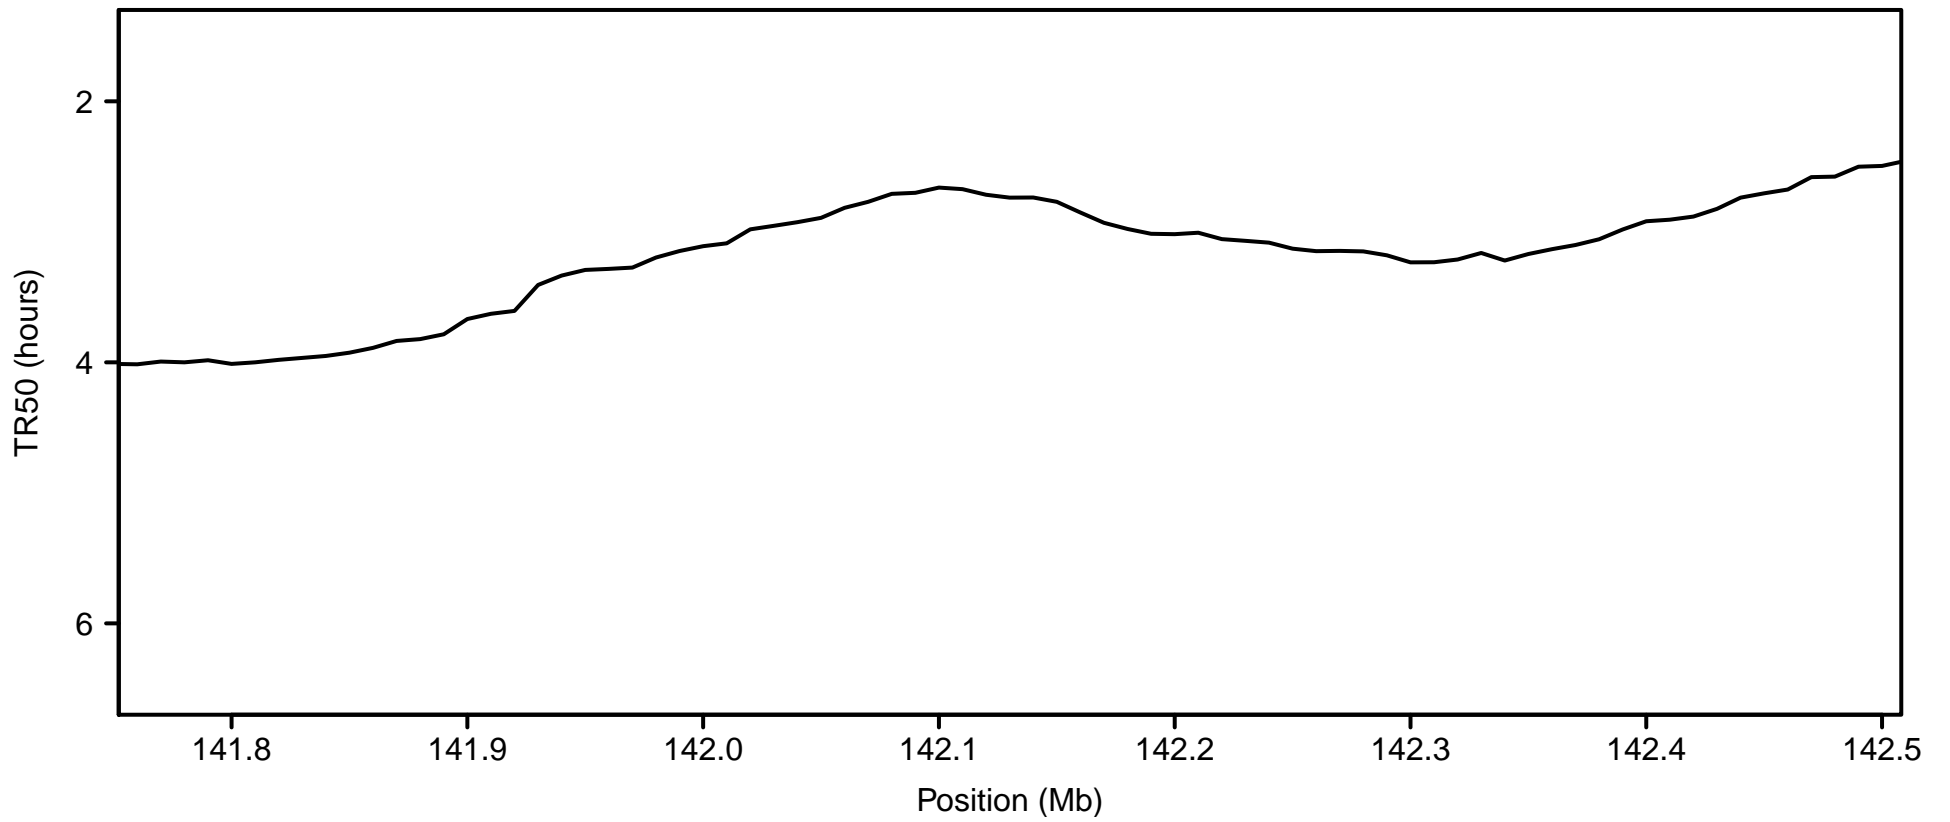

Apparent replication speed

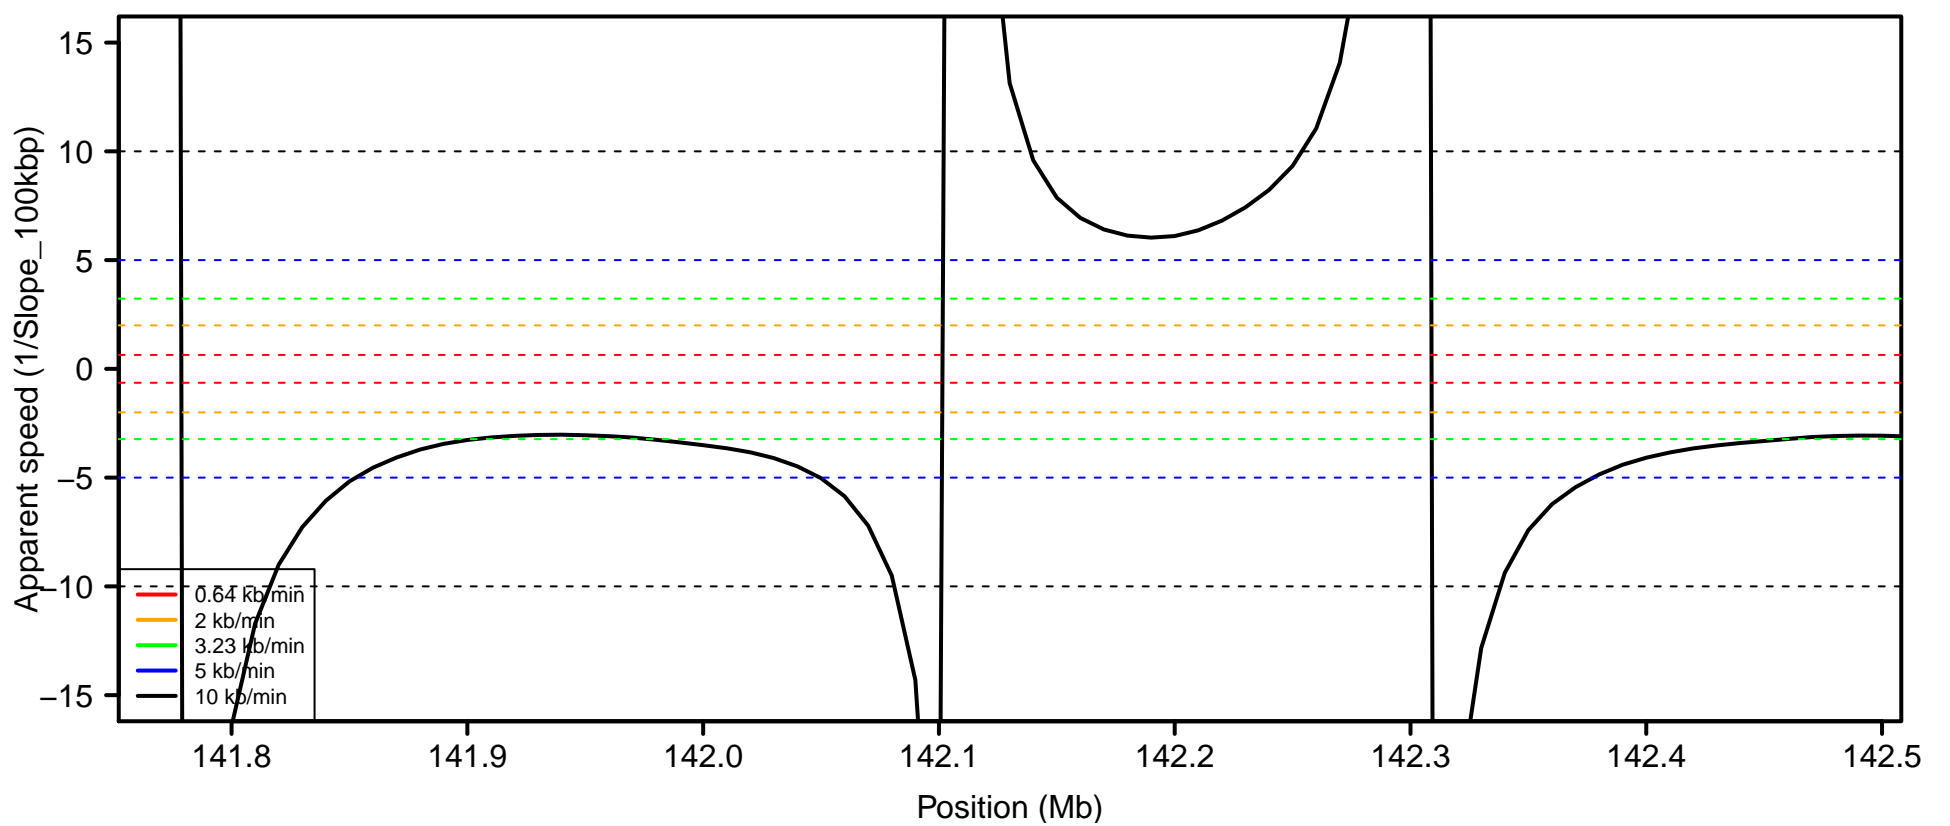

# Replication Timing Vs Encode Origin data, ENr334 (chr6:41405894\_41905894)

Annotation

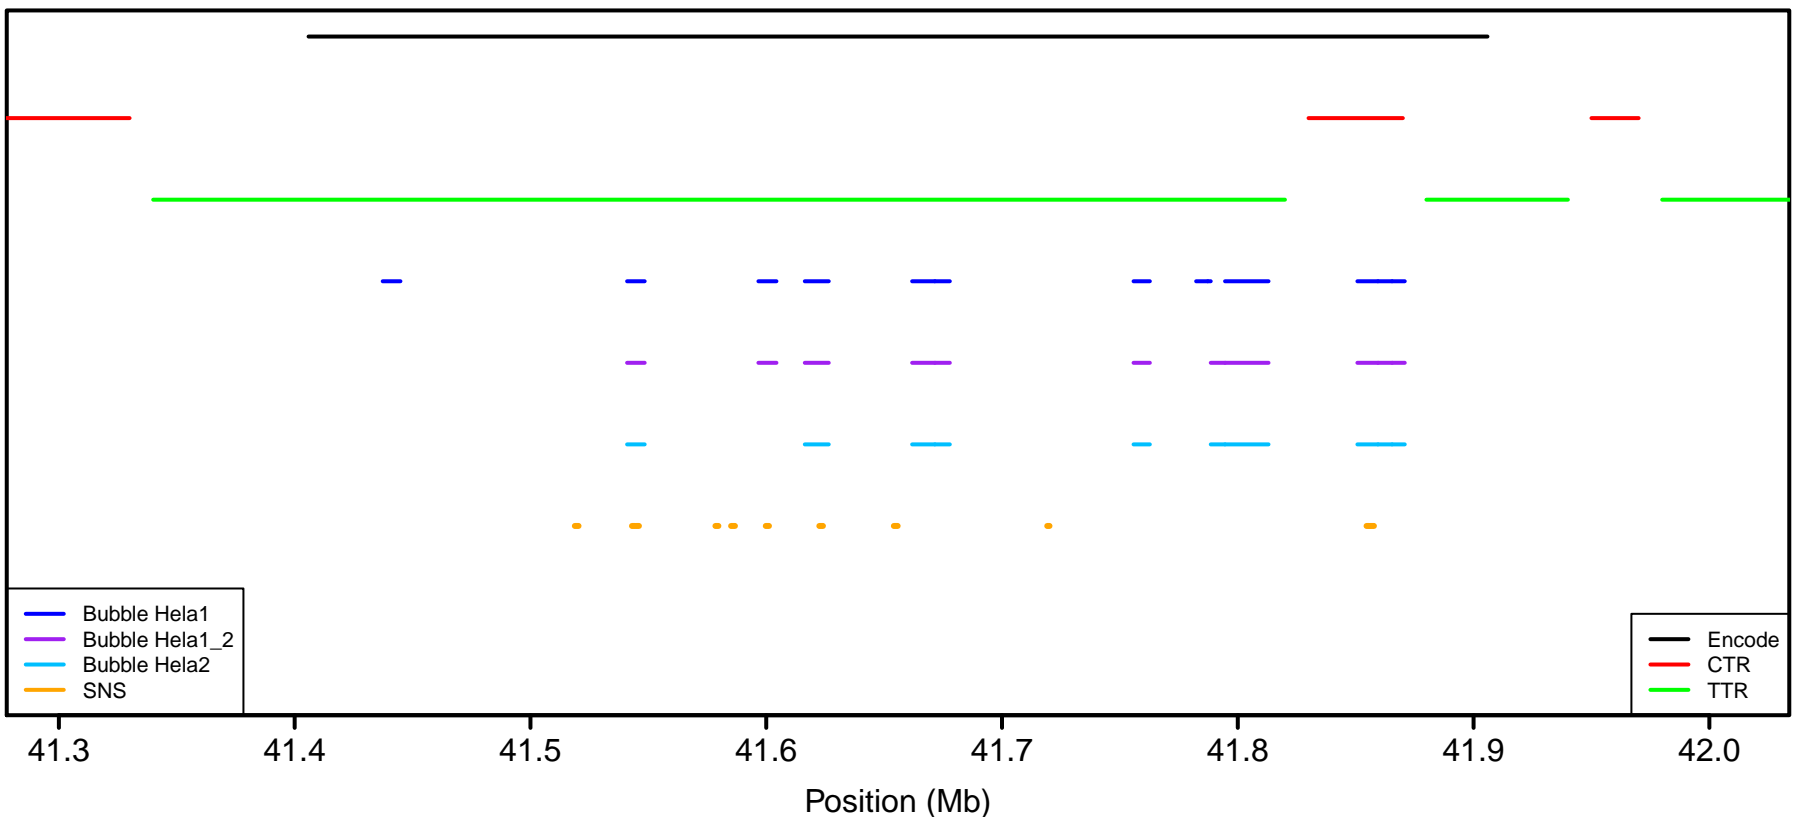

Timing of HeLa

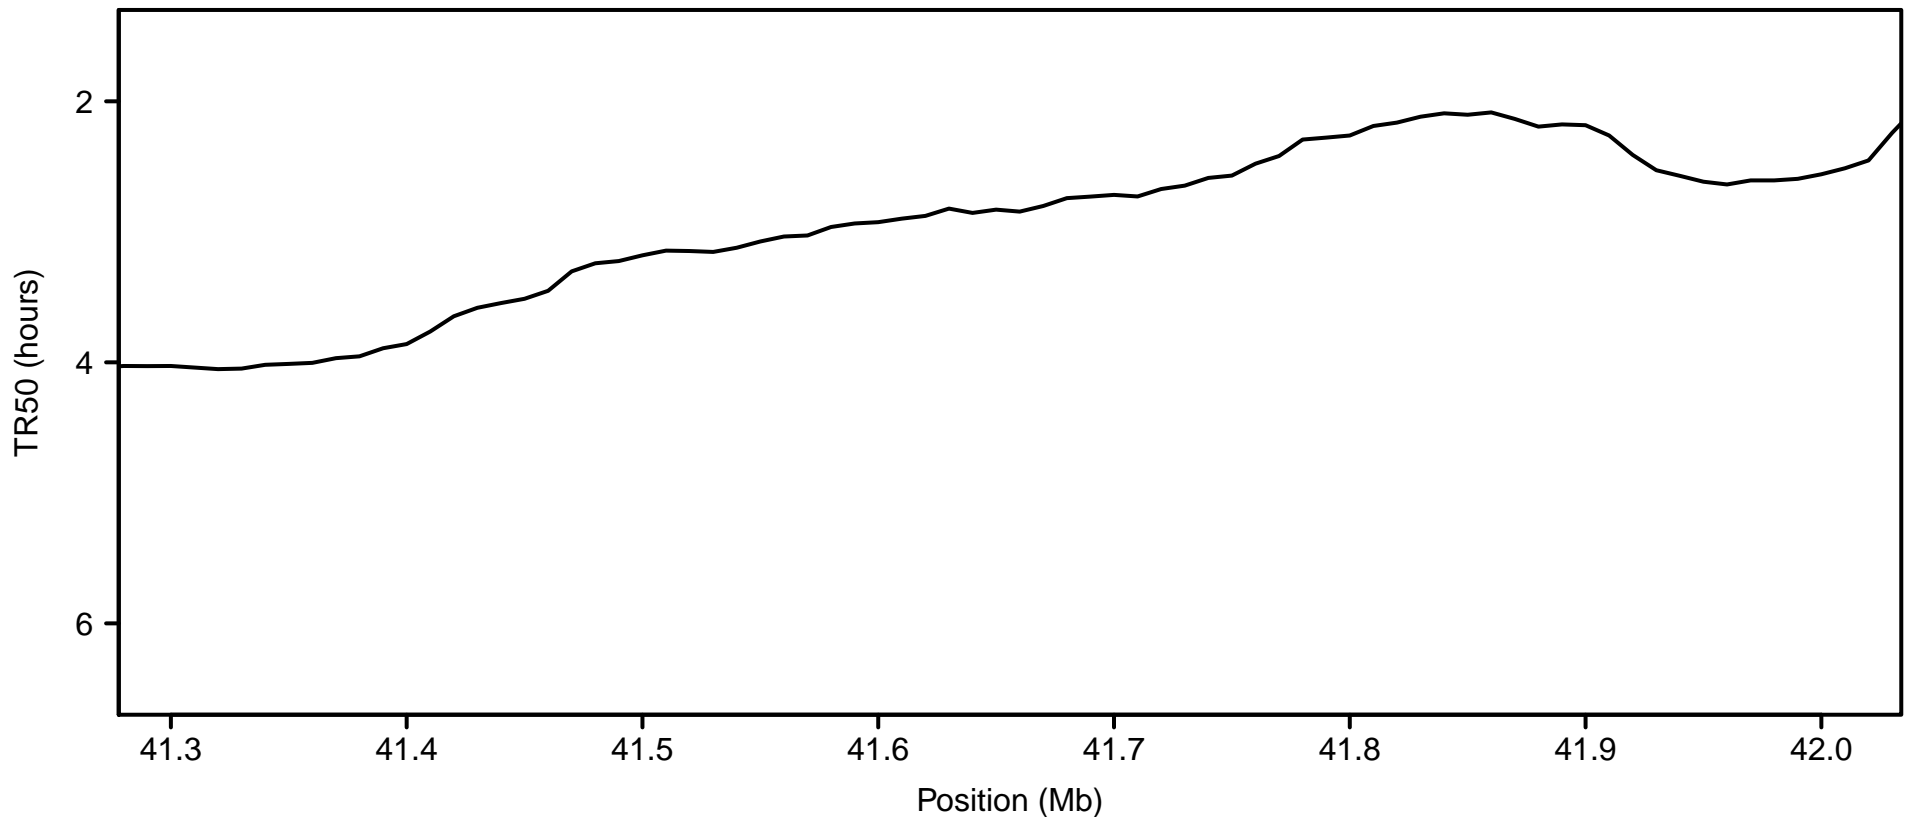

Apparent replication speed

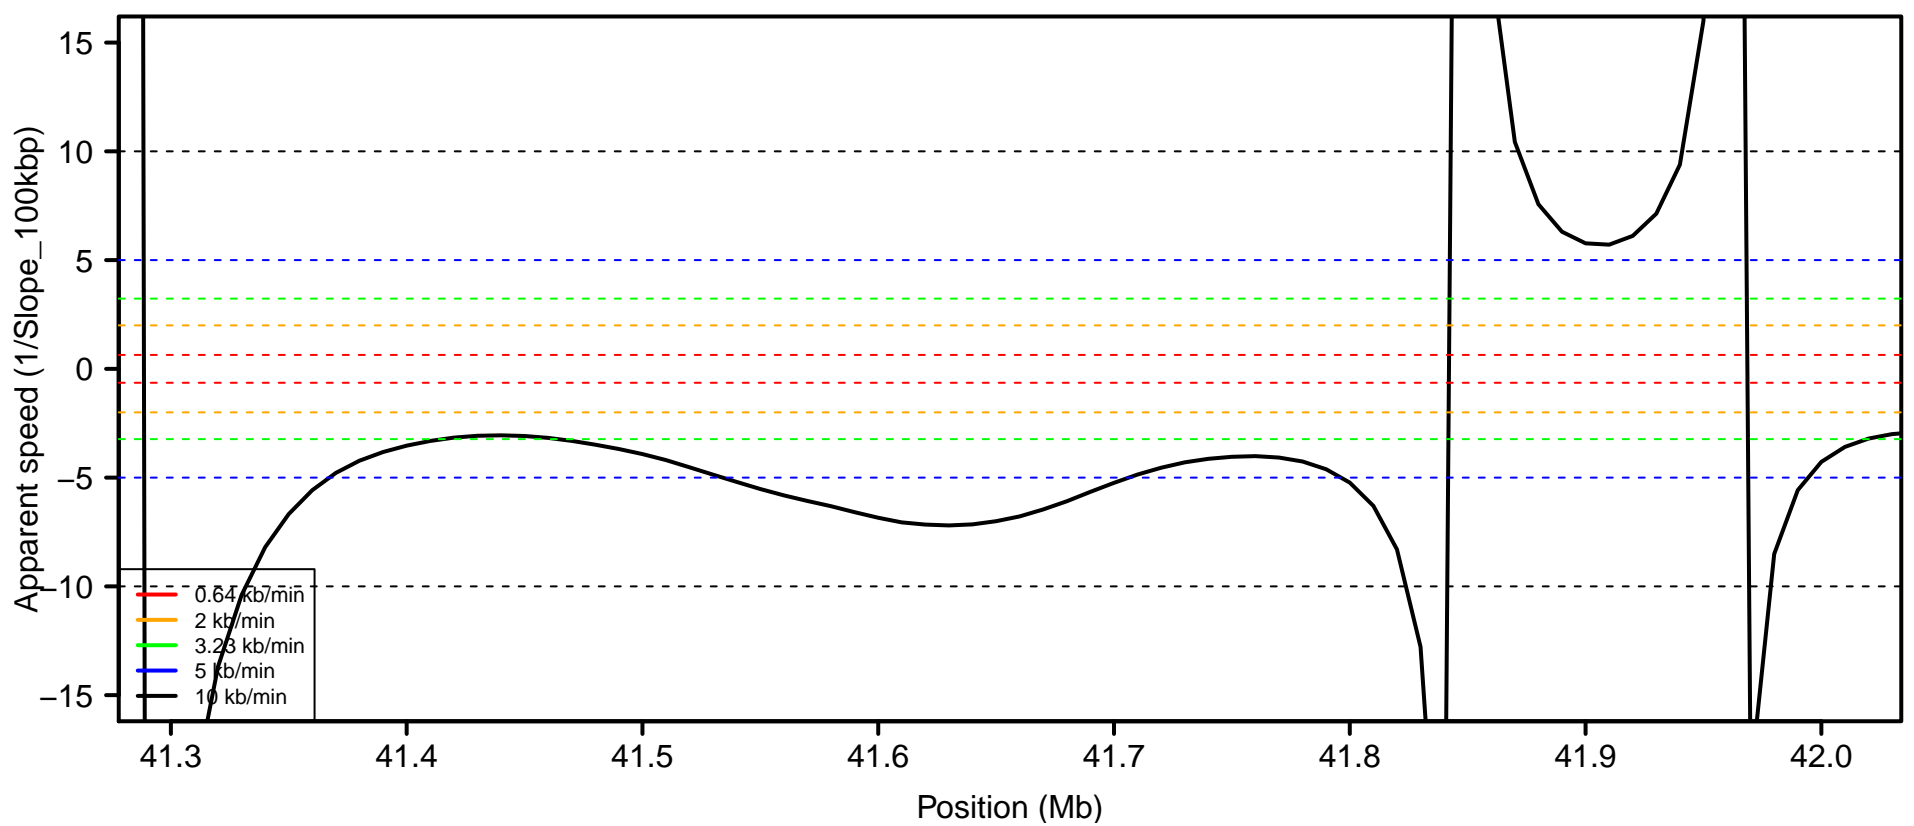

# Replication Timing Vs Encode Origin data, ENr223 (chr6:73789952\_74289952)

Annotation

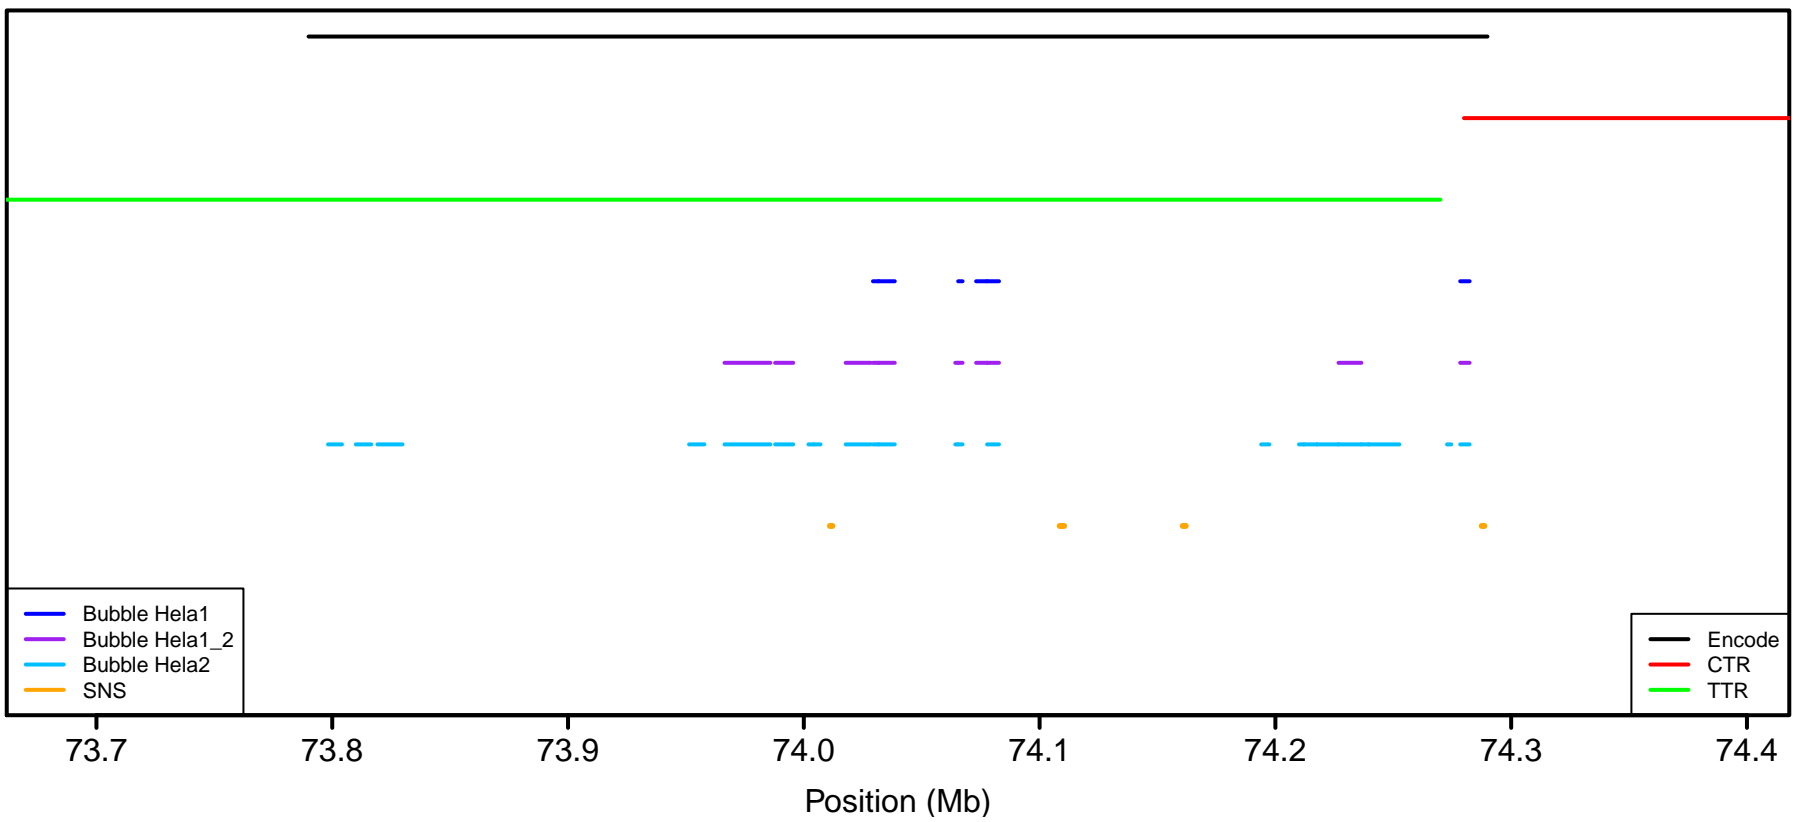

Timing of HeLa

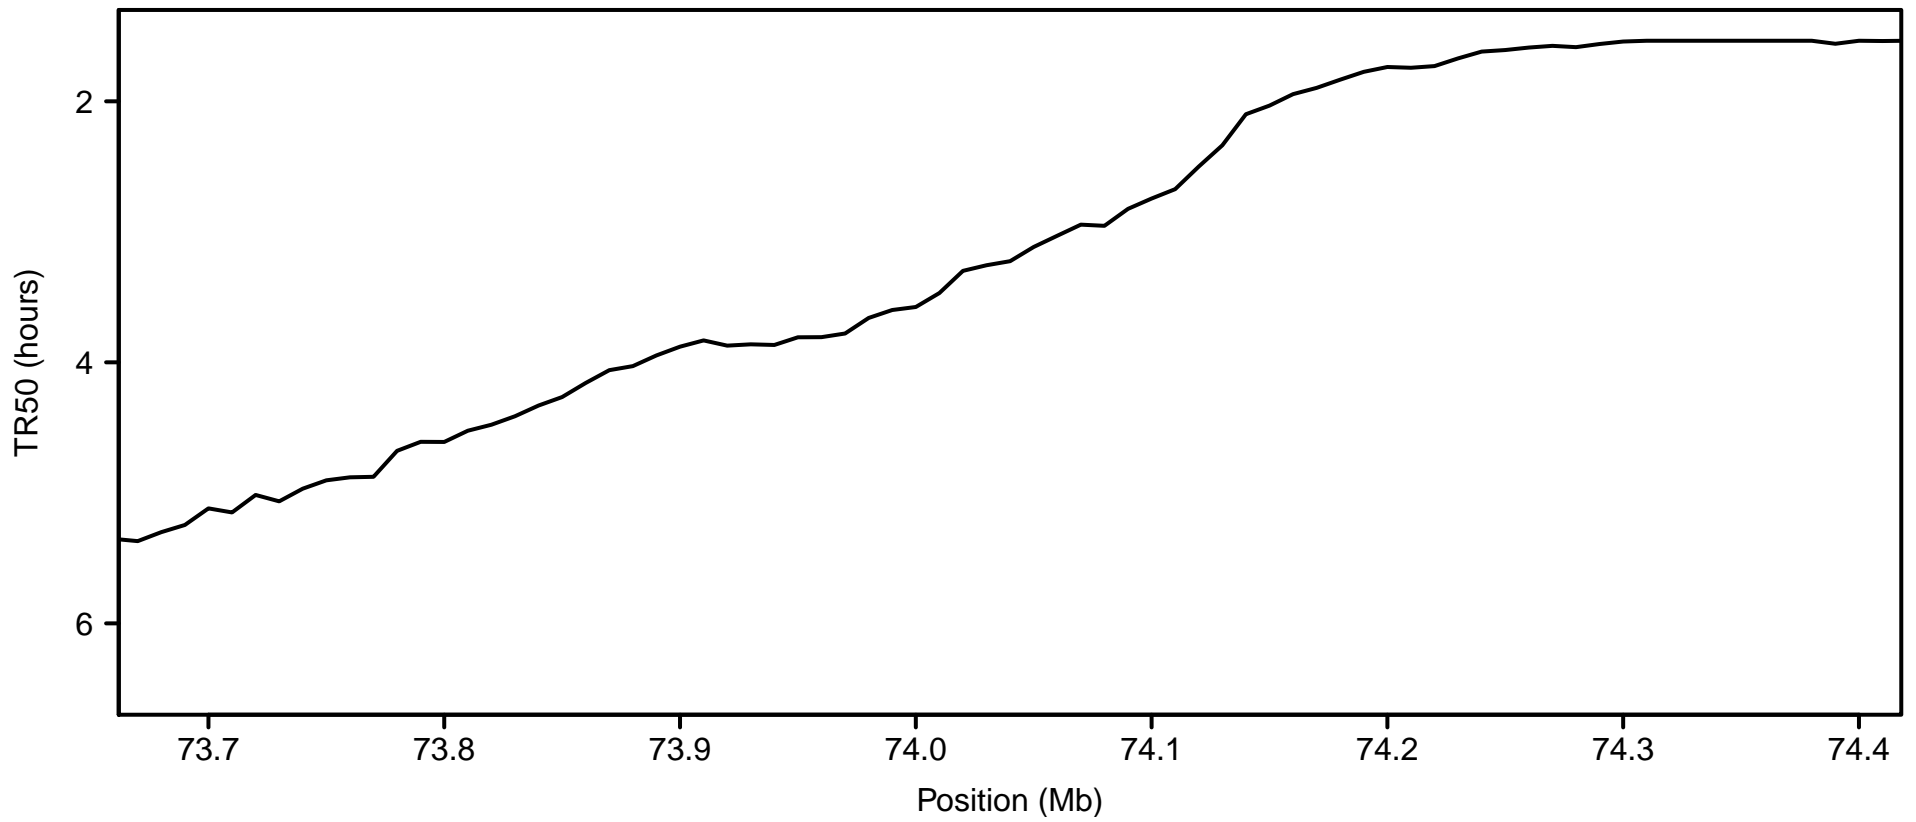

Apparent replication speed

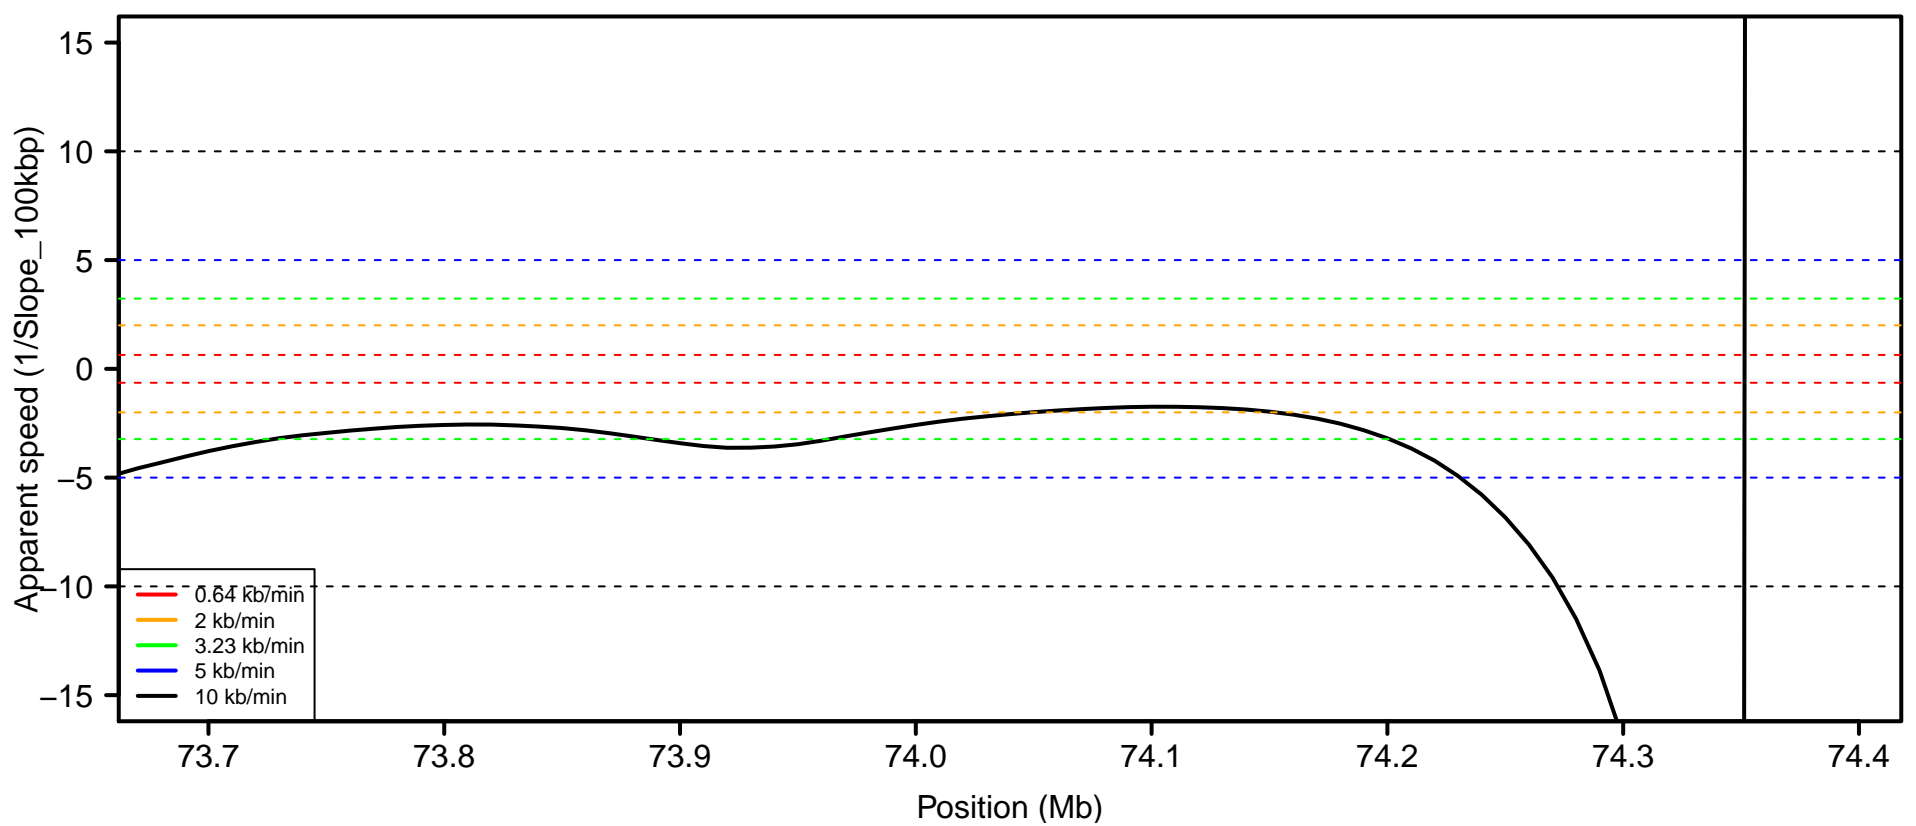

# Replication Timing Vs Encode Origin data, ENr323 (chr6:108371396\_108871396)

Annotation

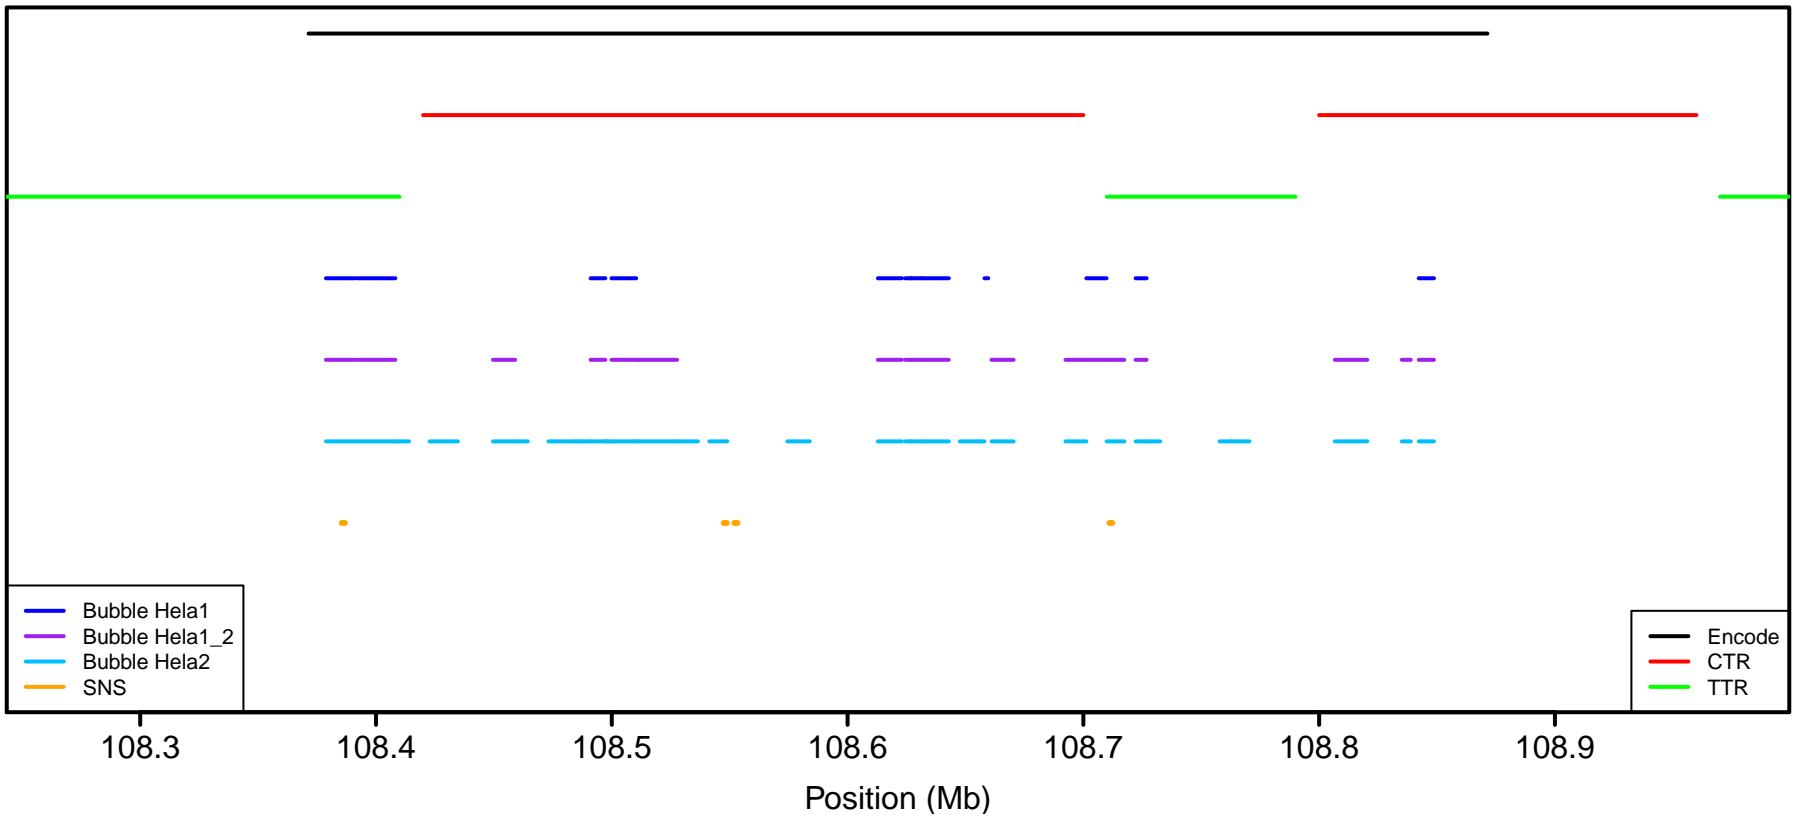

Timing of HeLa

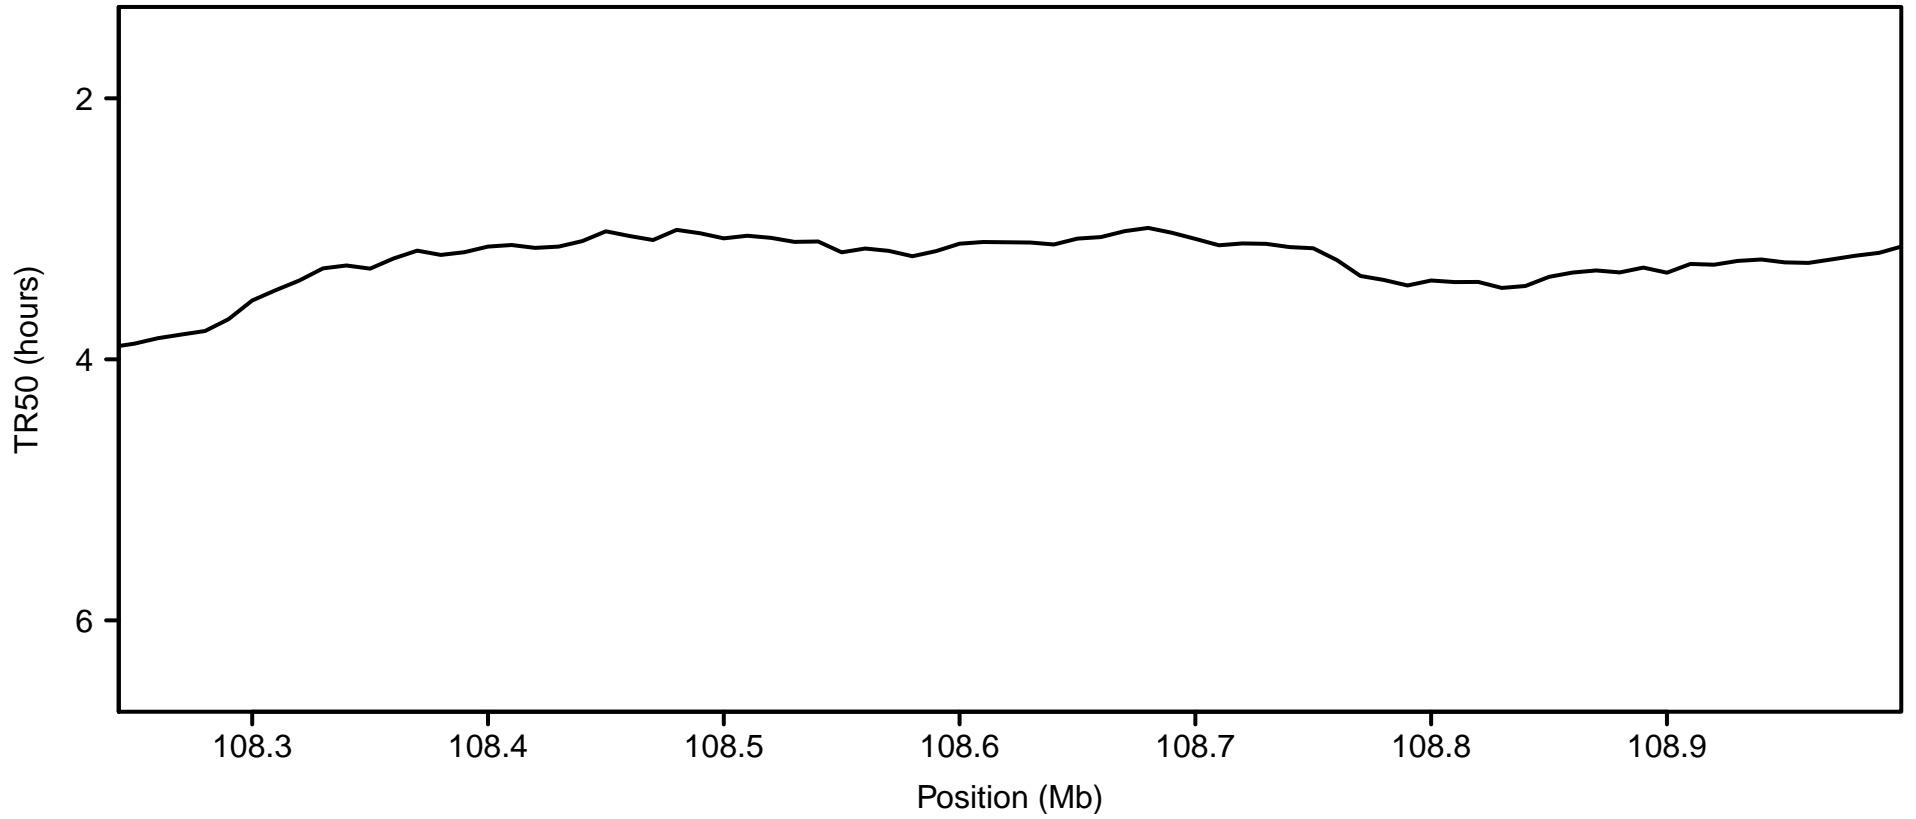

Apparent replication speed

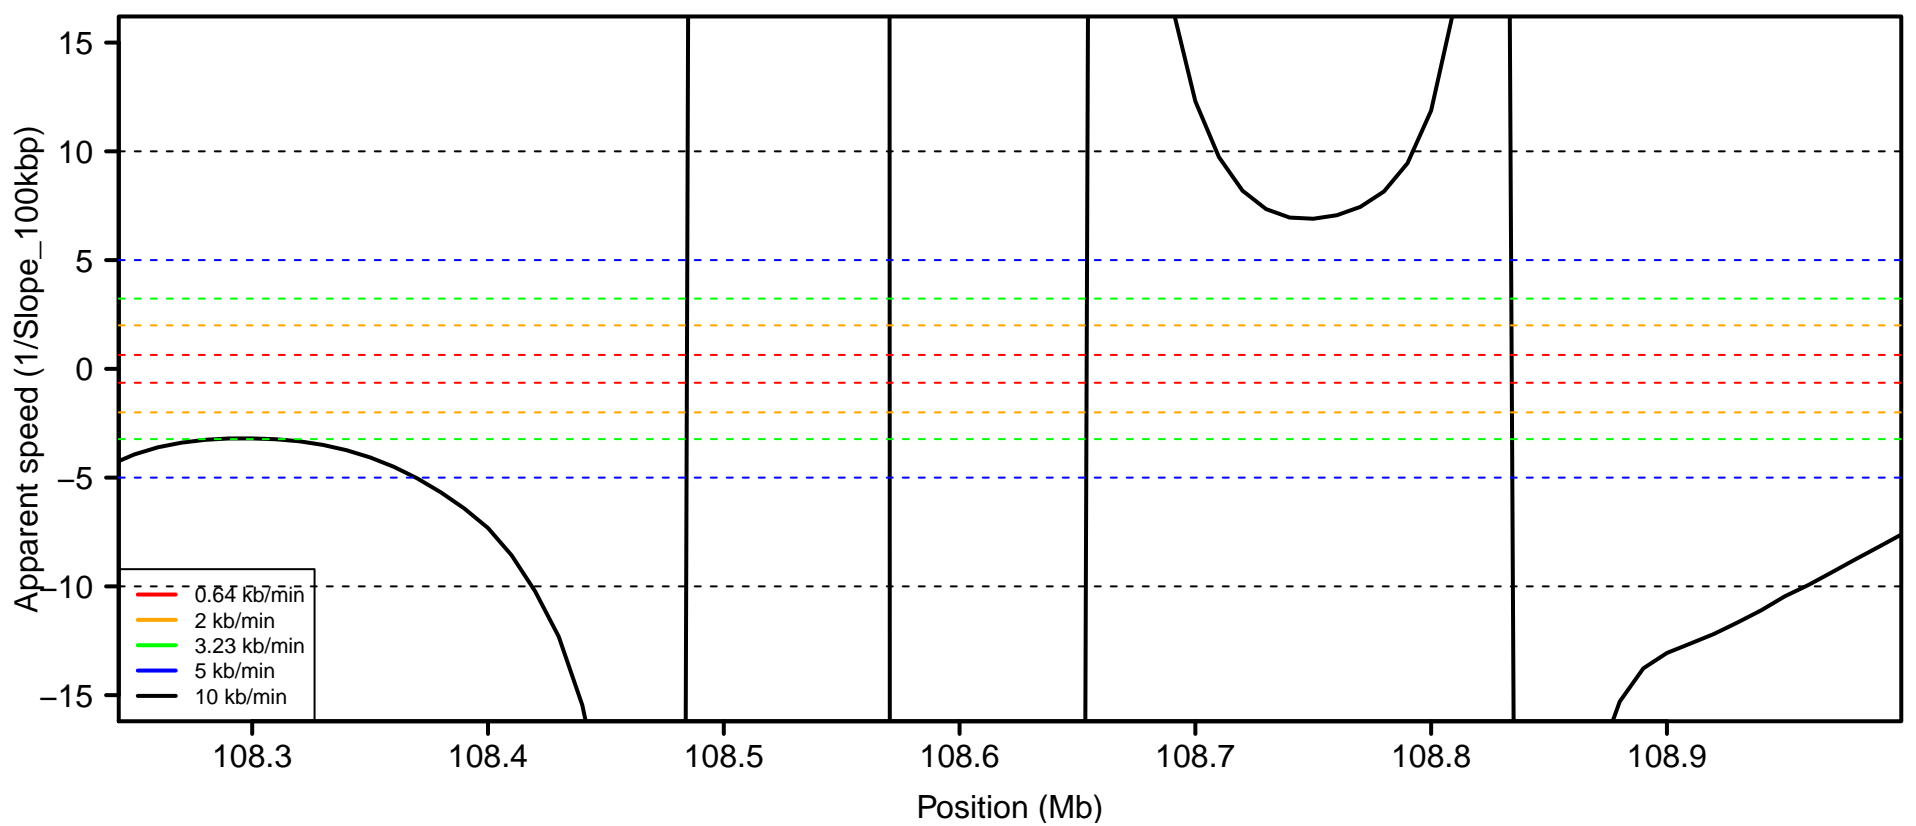

# Replication Timing Vs Encode Origin data, ENr222 (chr6:132218539\_132718539)

Annotation

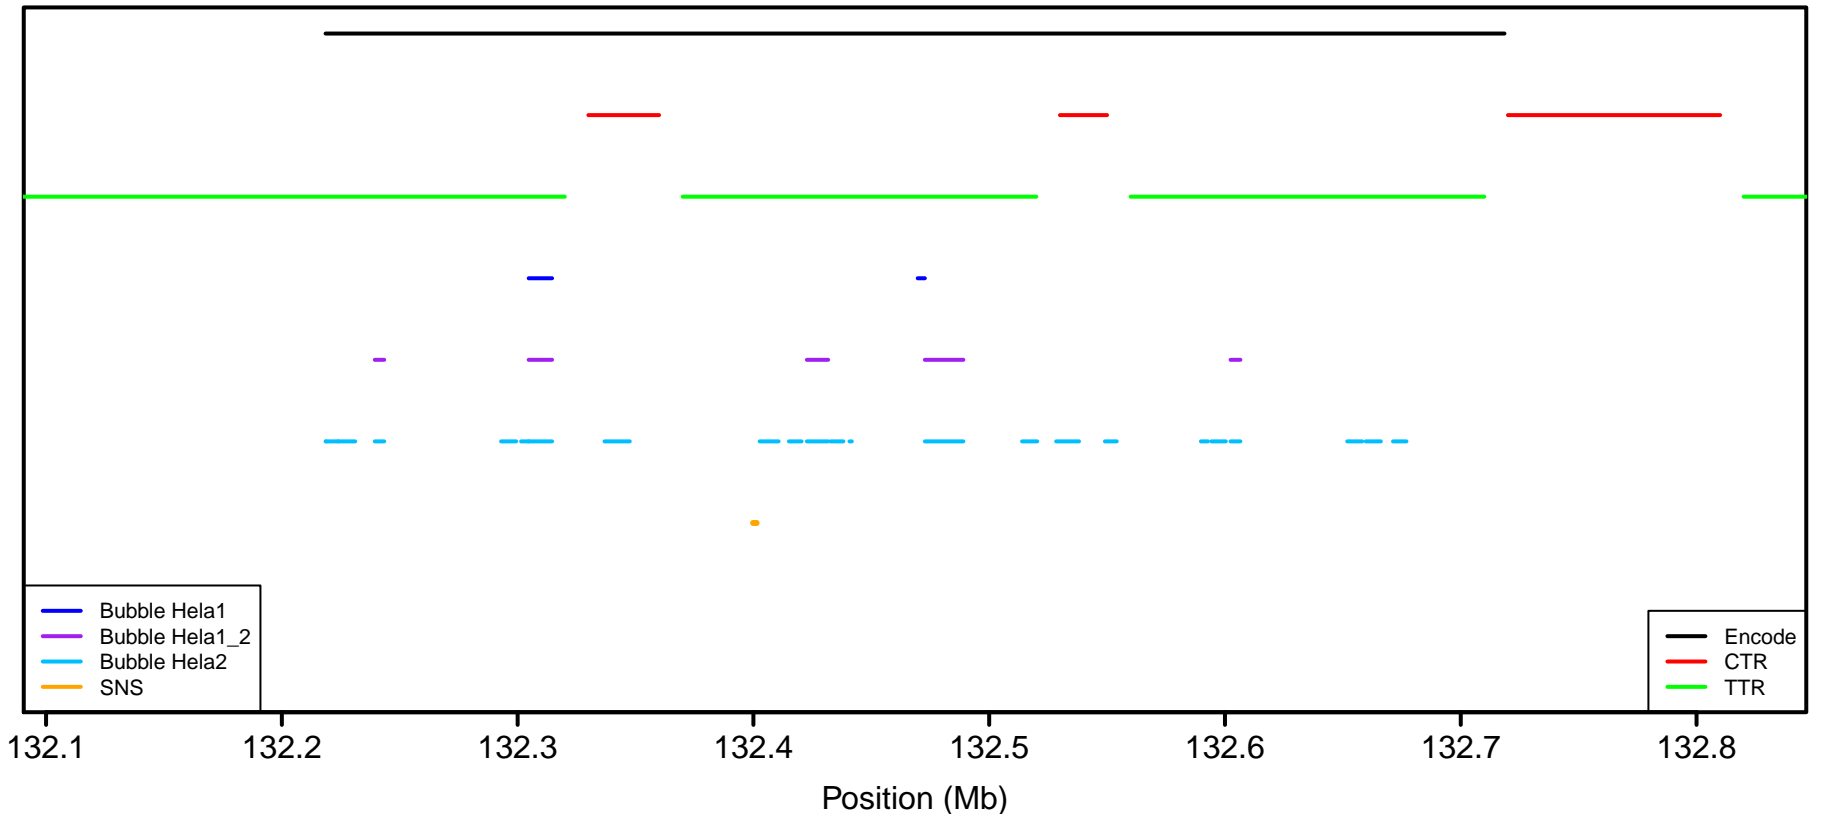

Timing of HeLa

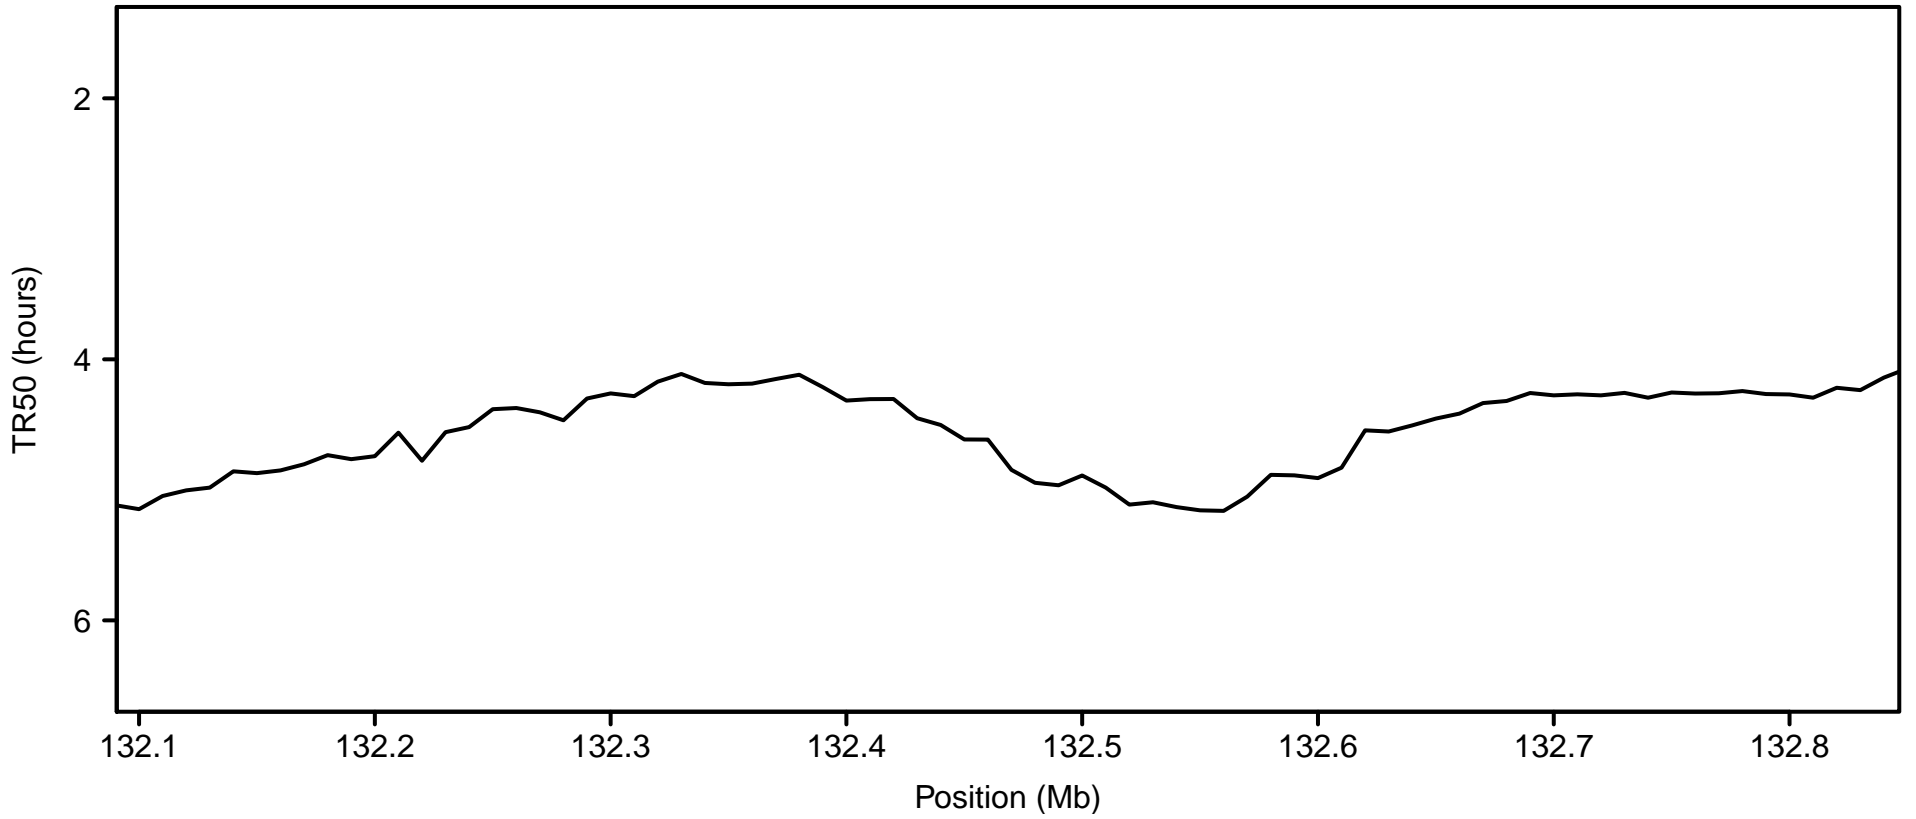

Apparent replication speed

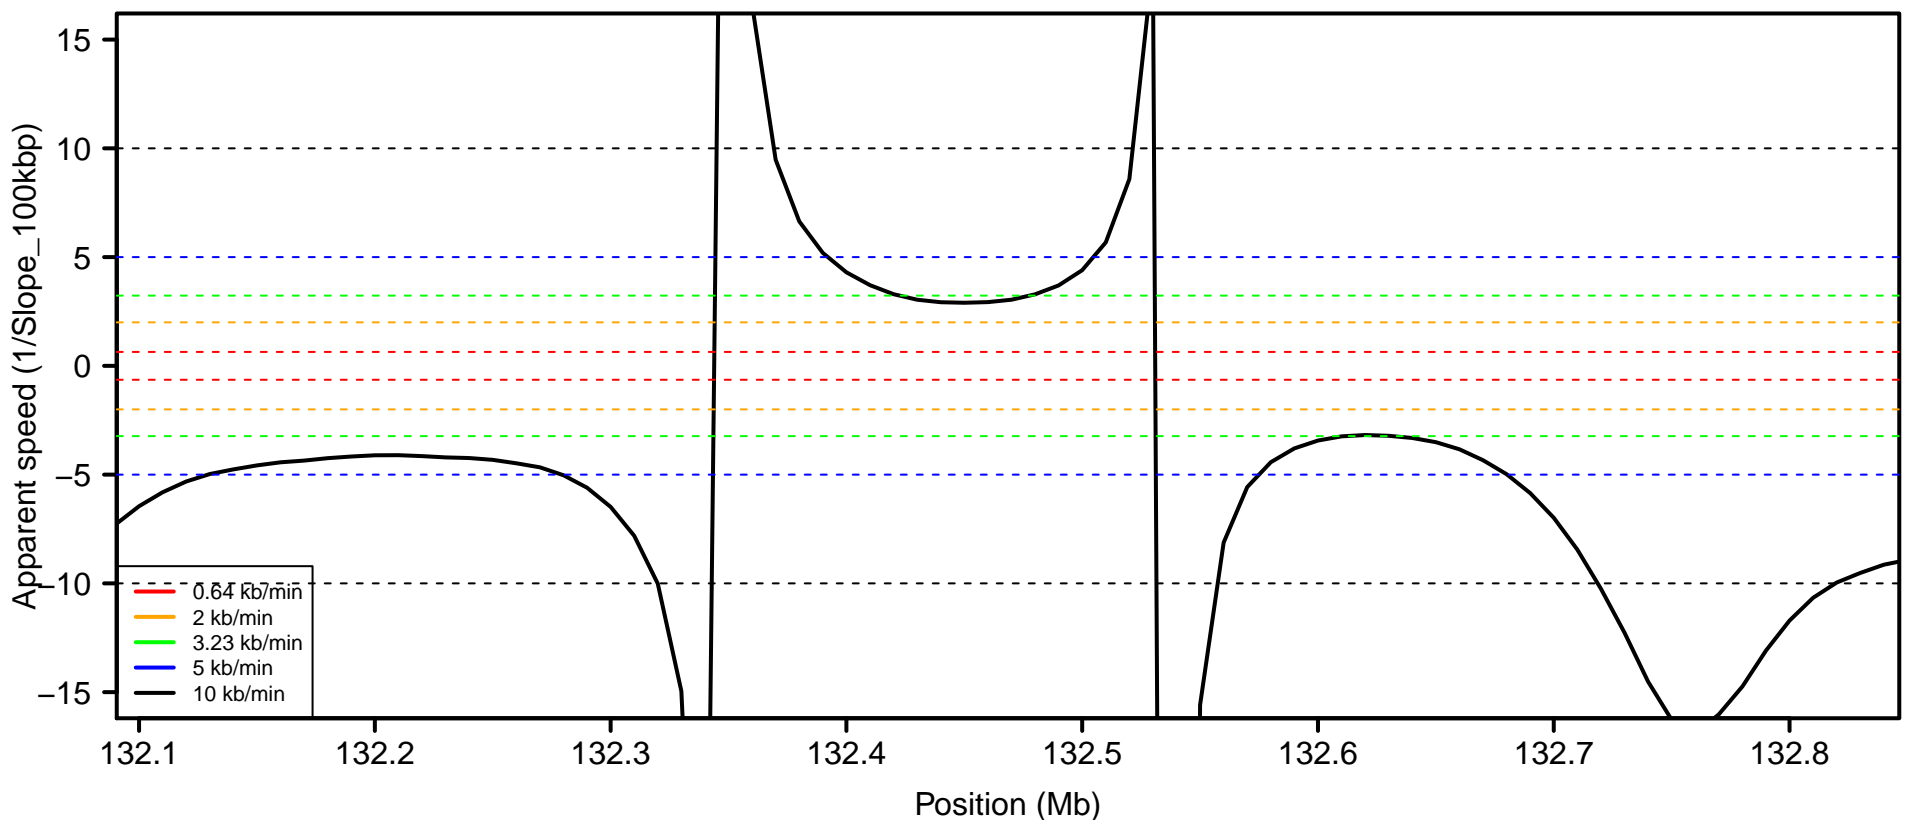

# Replication Timing Vs Encode Origin data, ENm010 (chr7:26924045\_27424045)

Annotation

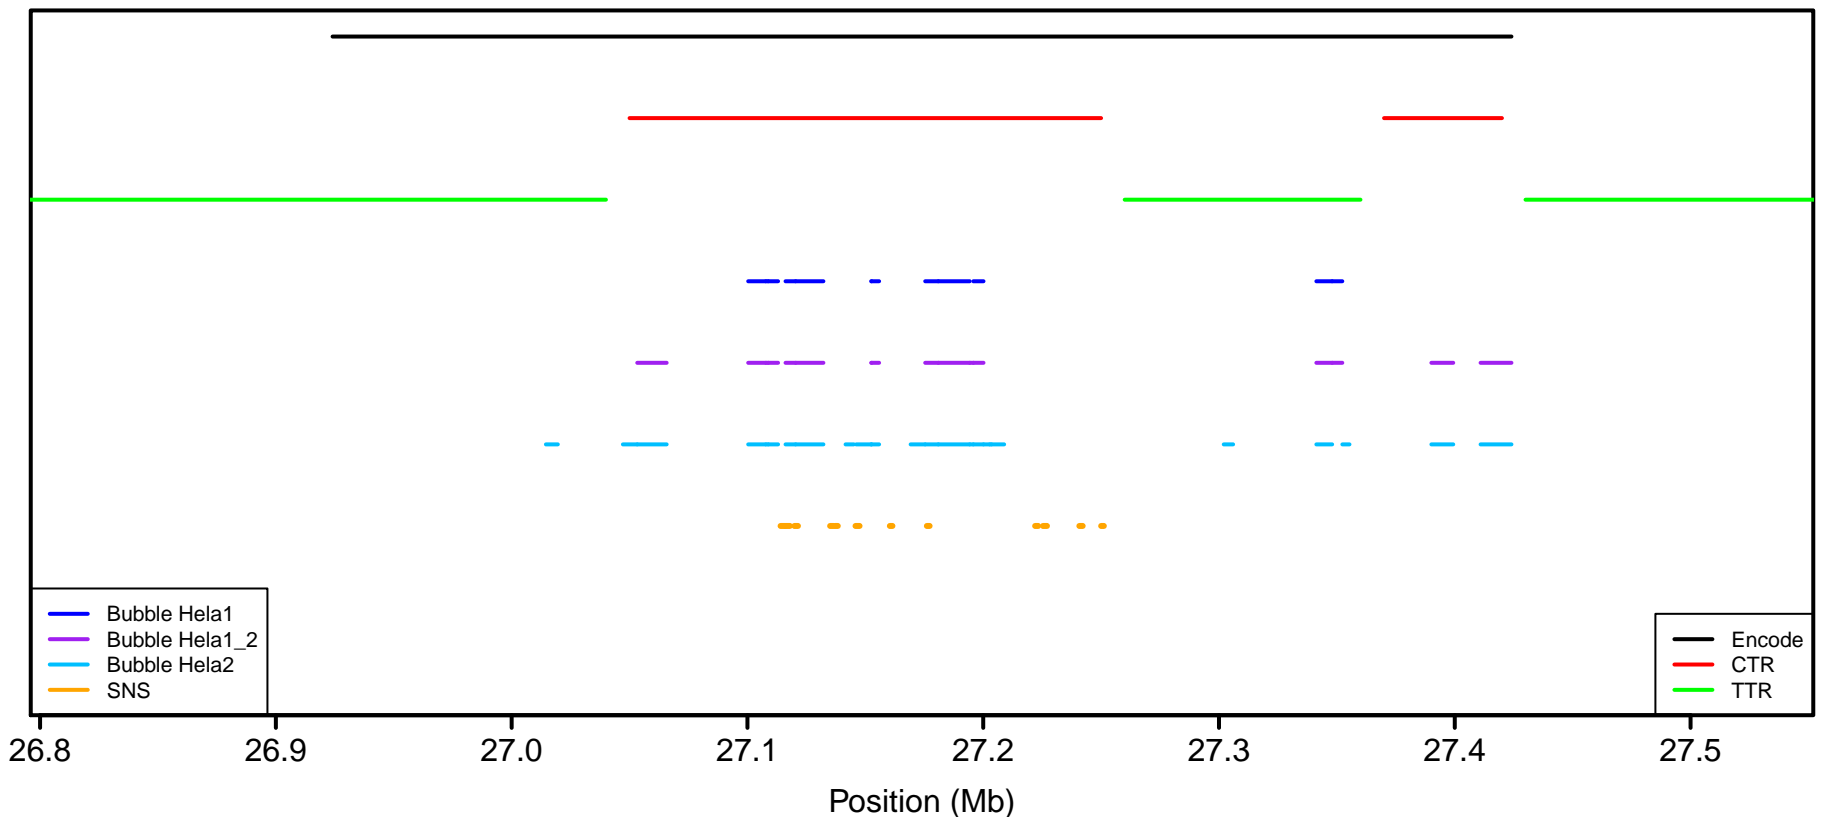

Timing of HeLa

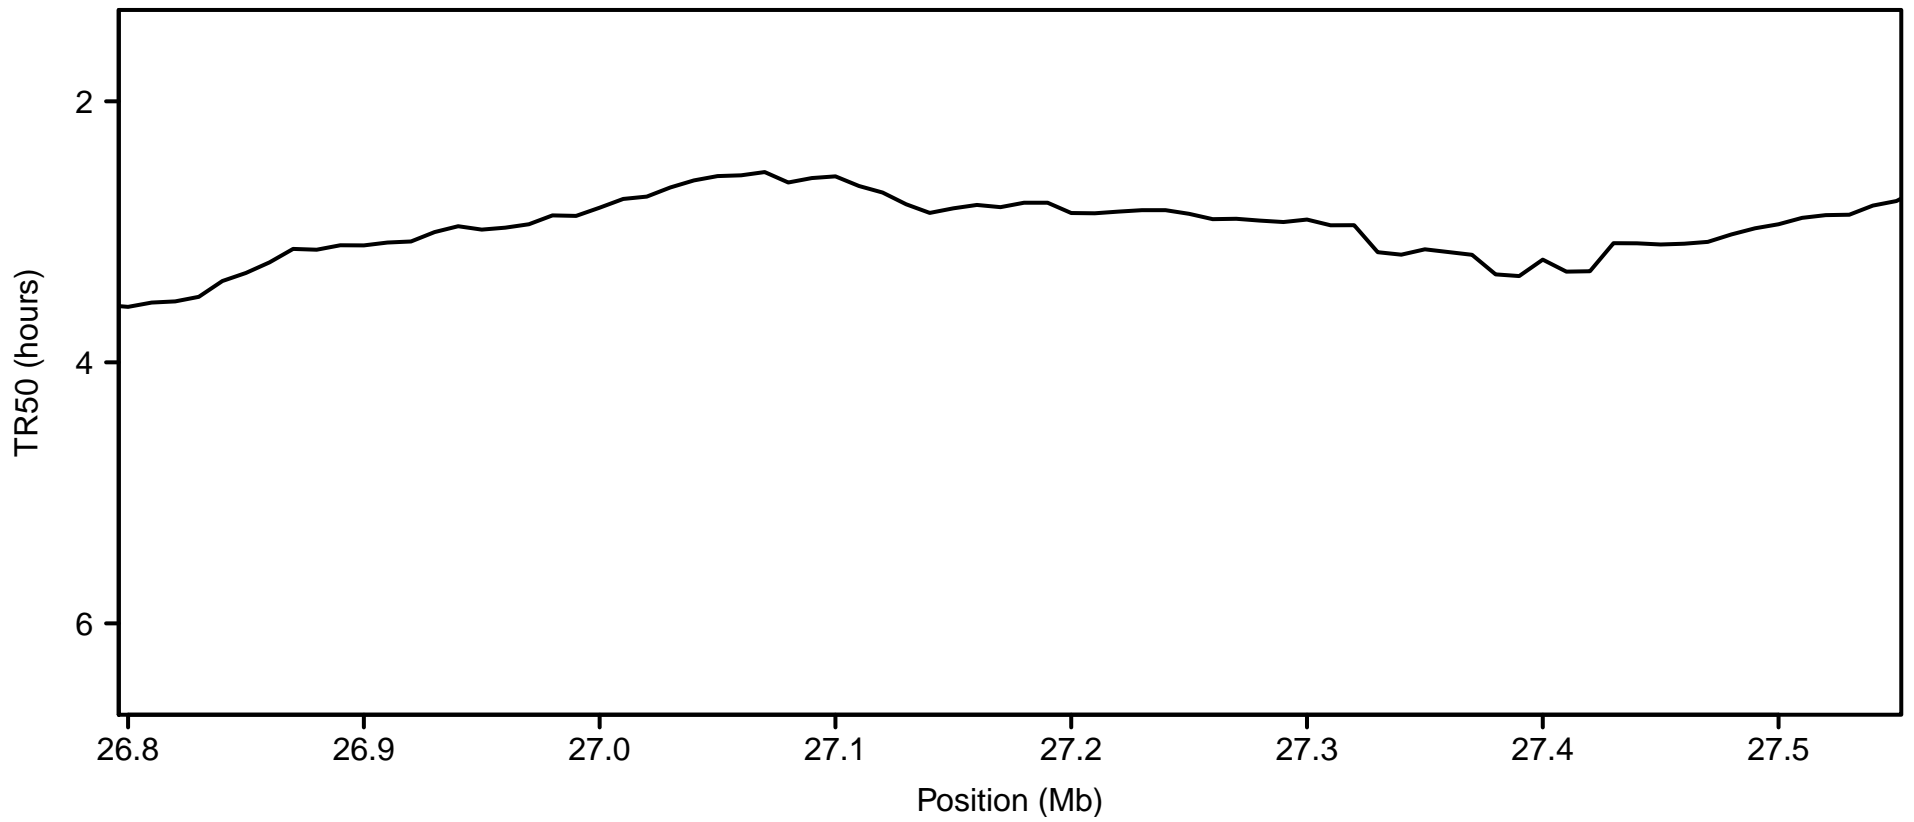

Apparent replication speed

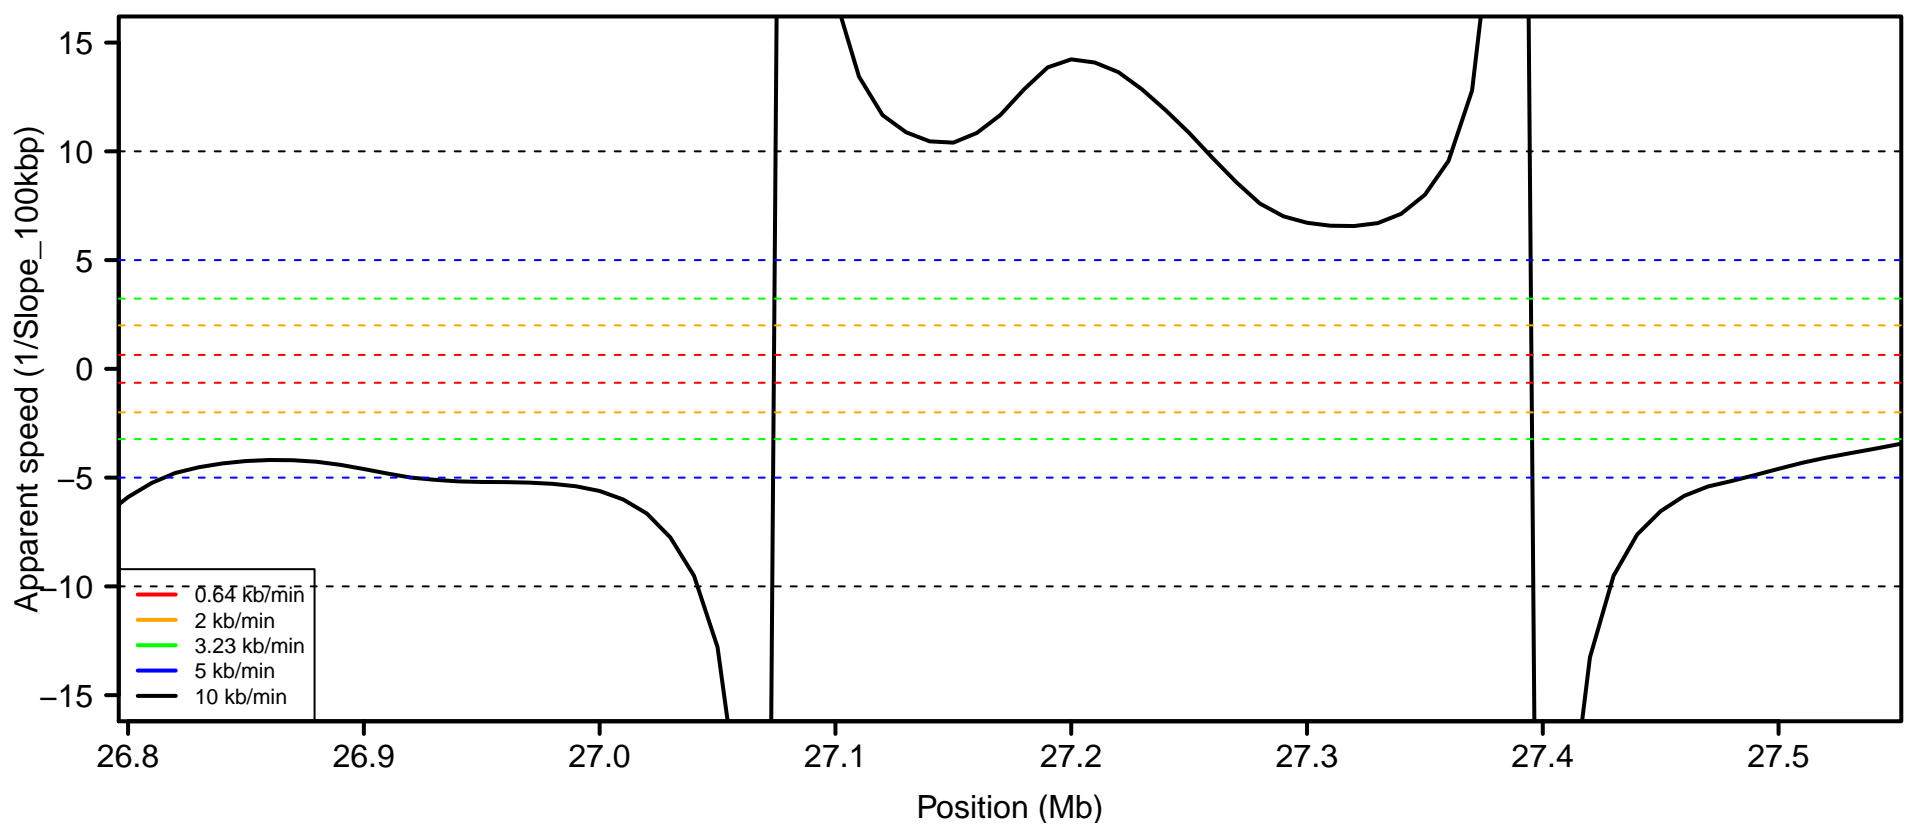

# Replication Timing Vs Encode Origin data, ENm013 (chr7:89621624\_90736048)

Annotation

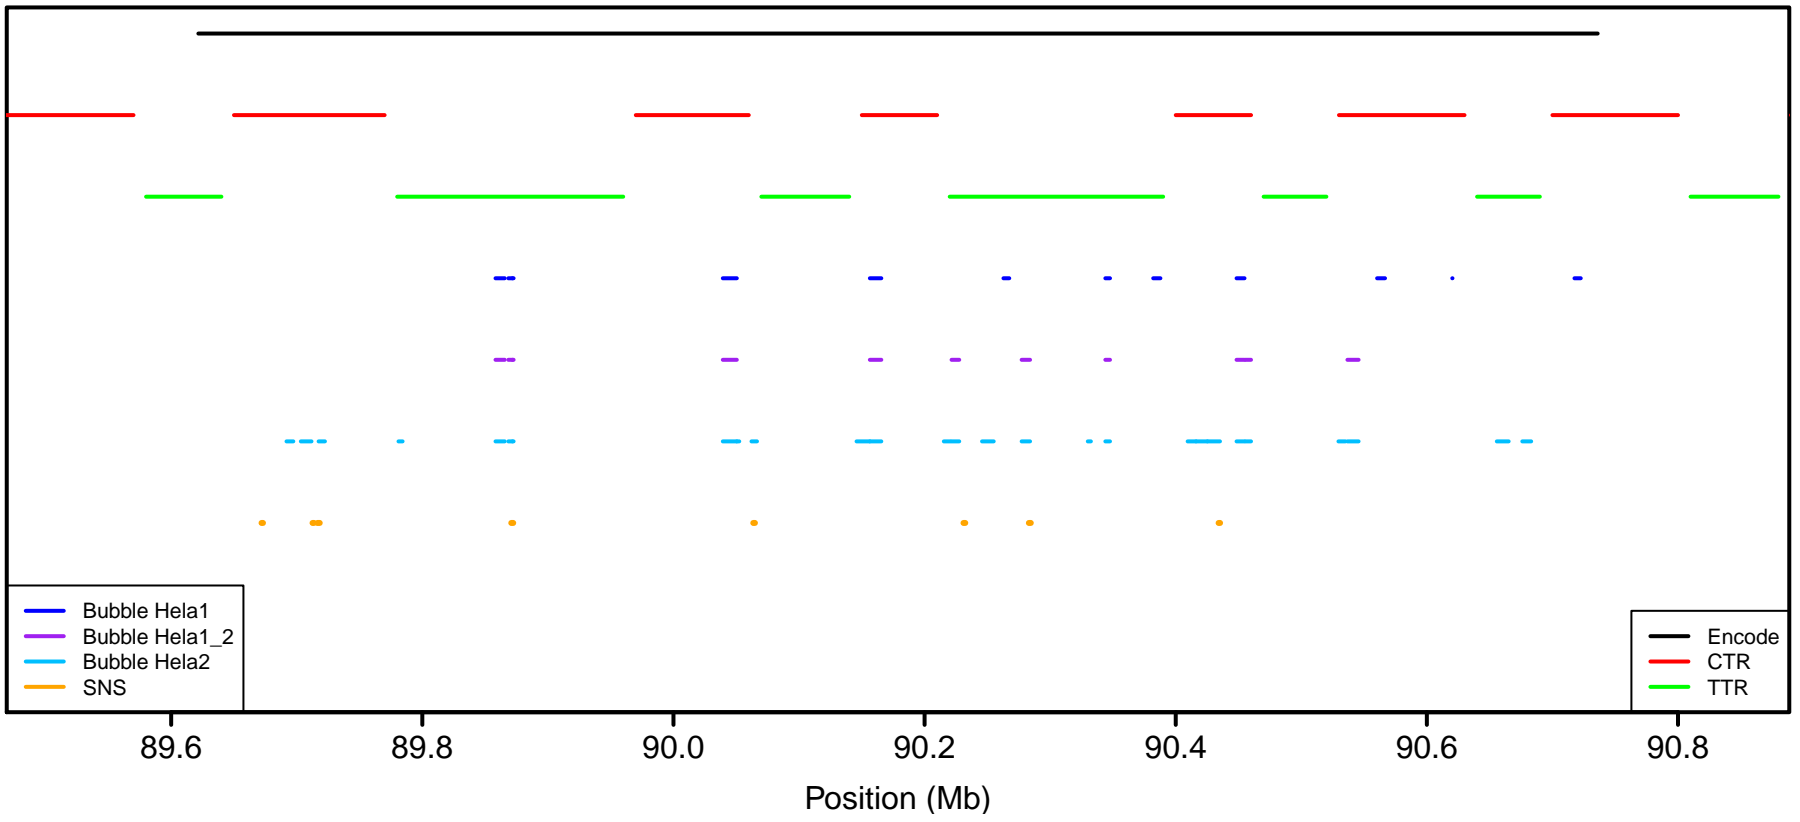

Timing of HeLa

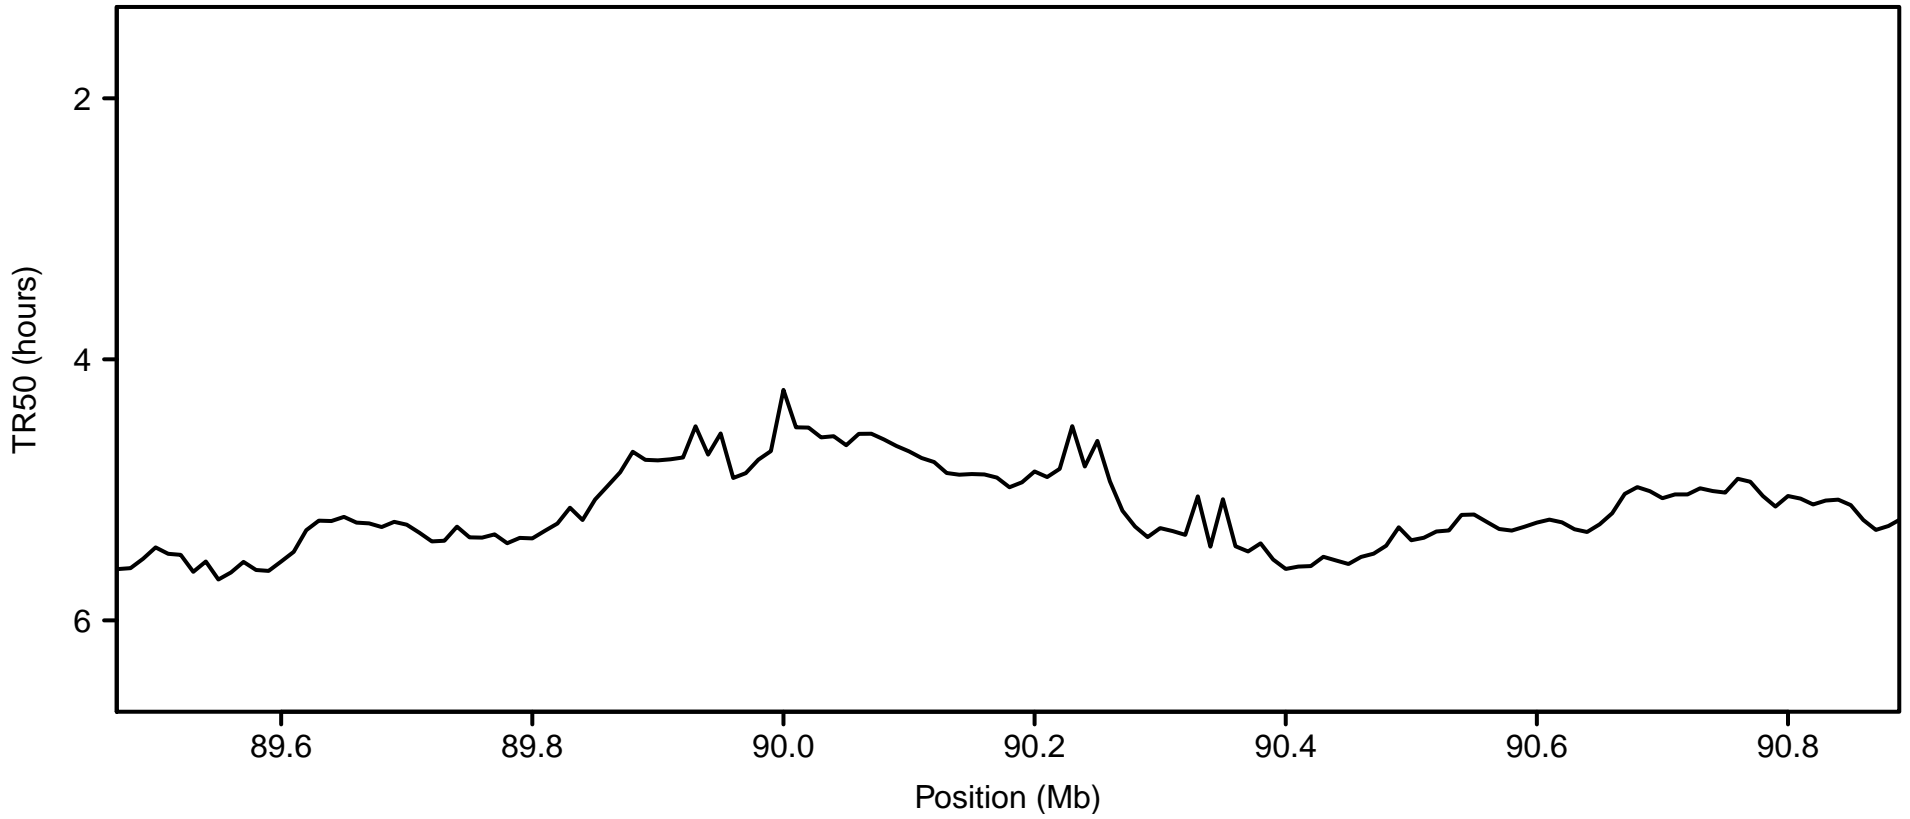

Apparent replication speed

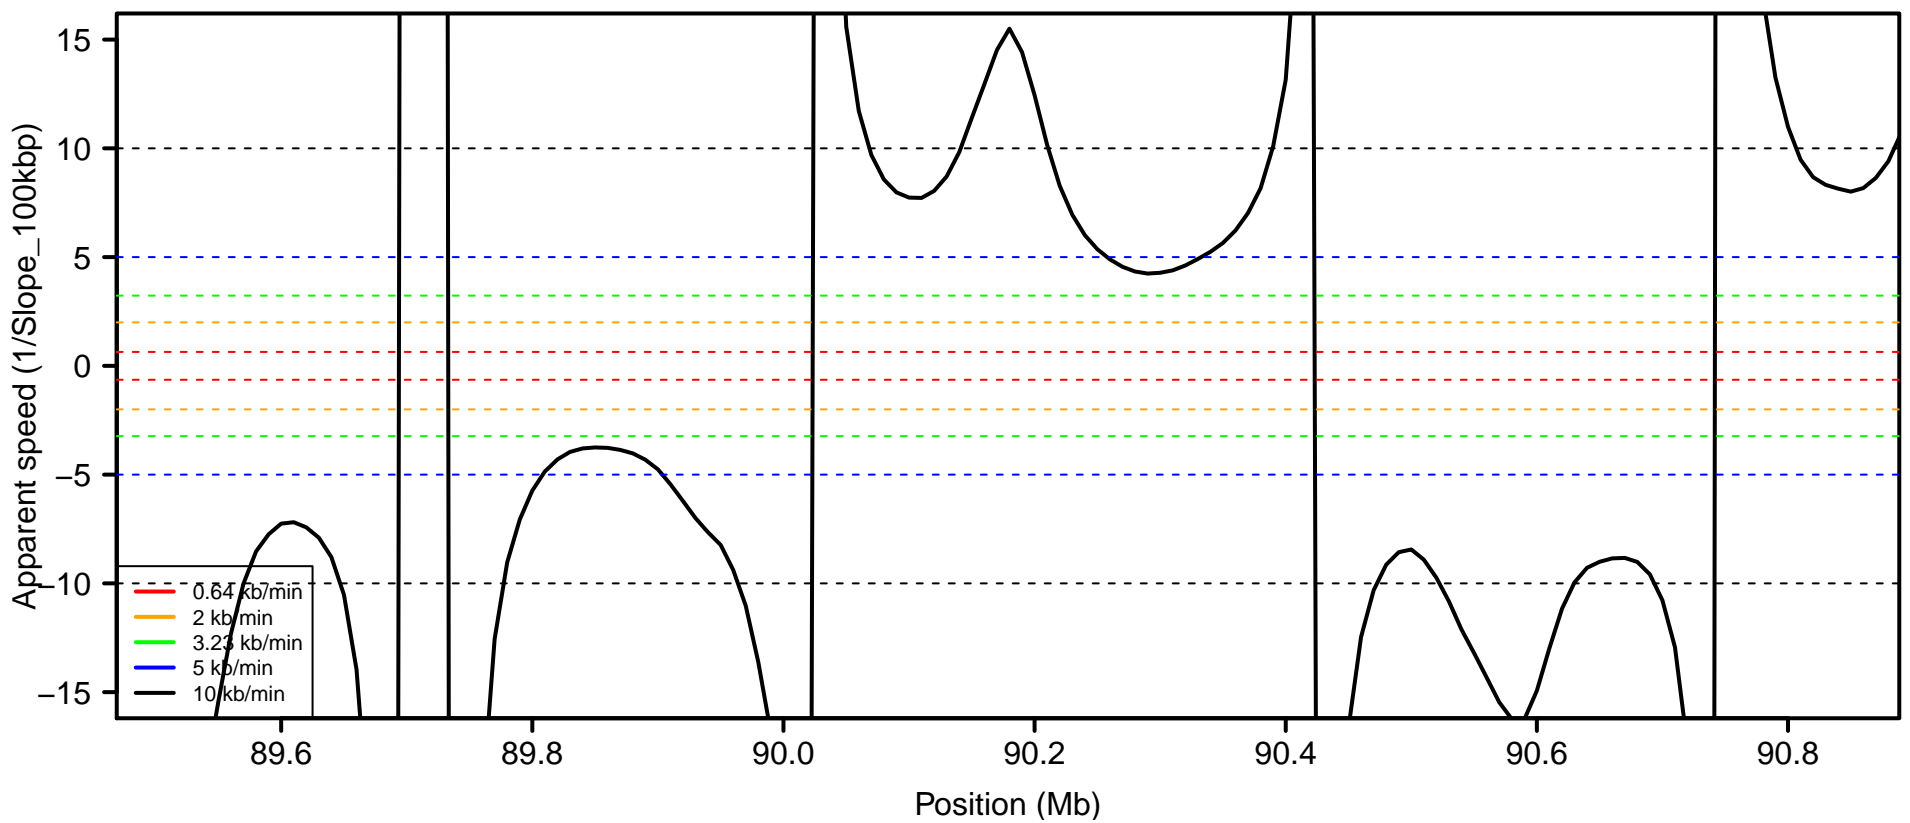

# Replication Timing Vs Encode Origin data, ENm012 (chr7:113720368\_114720368)

Annotation

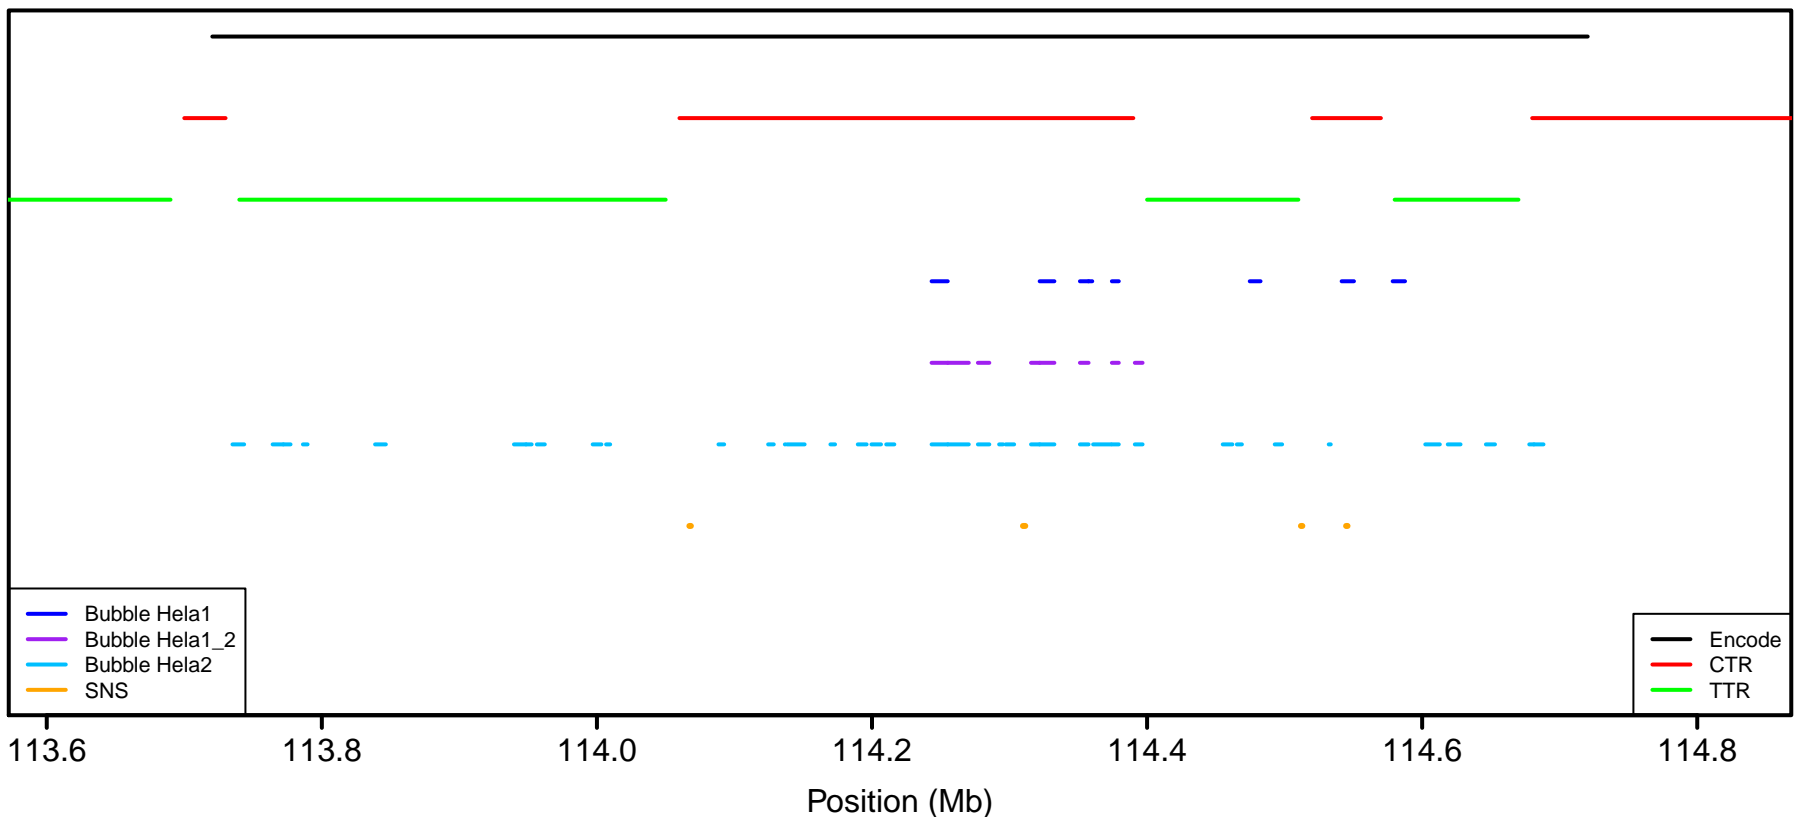

Timing of Hela

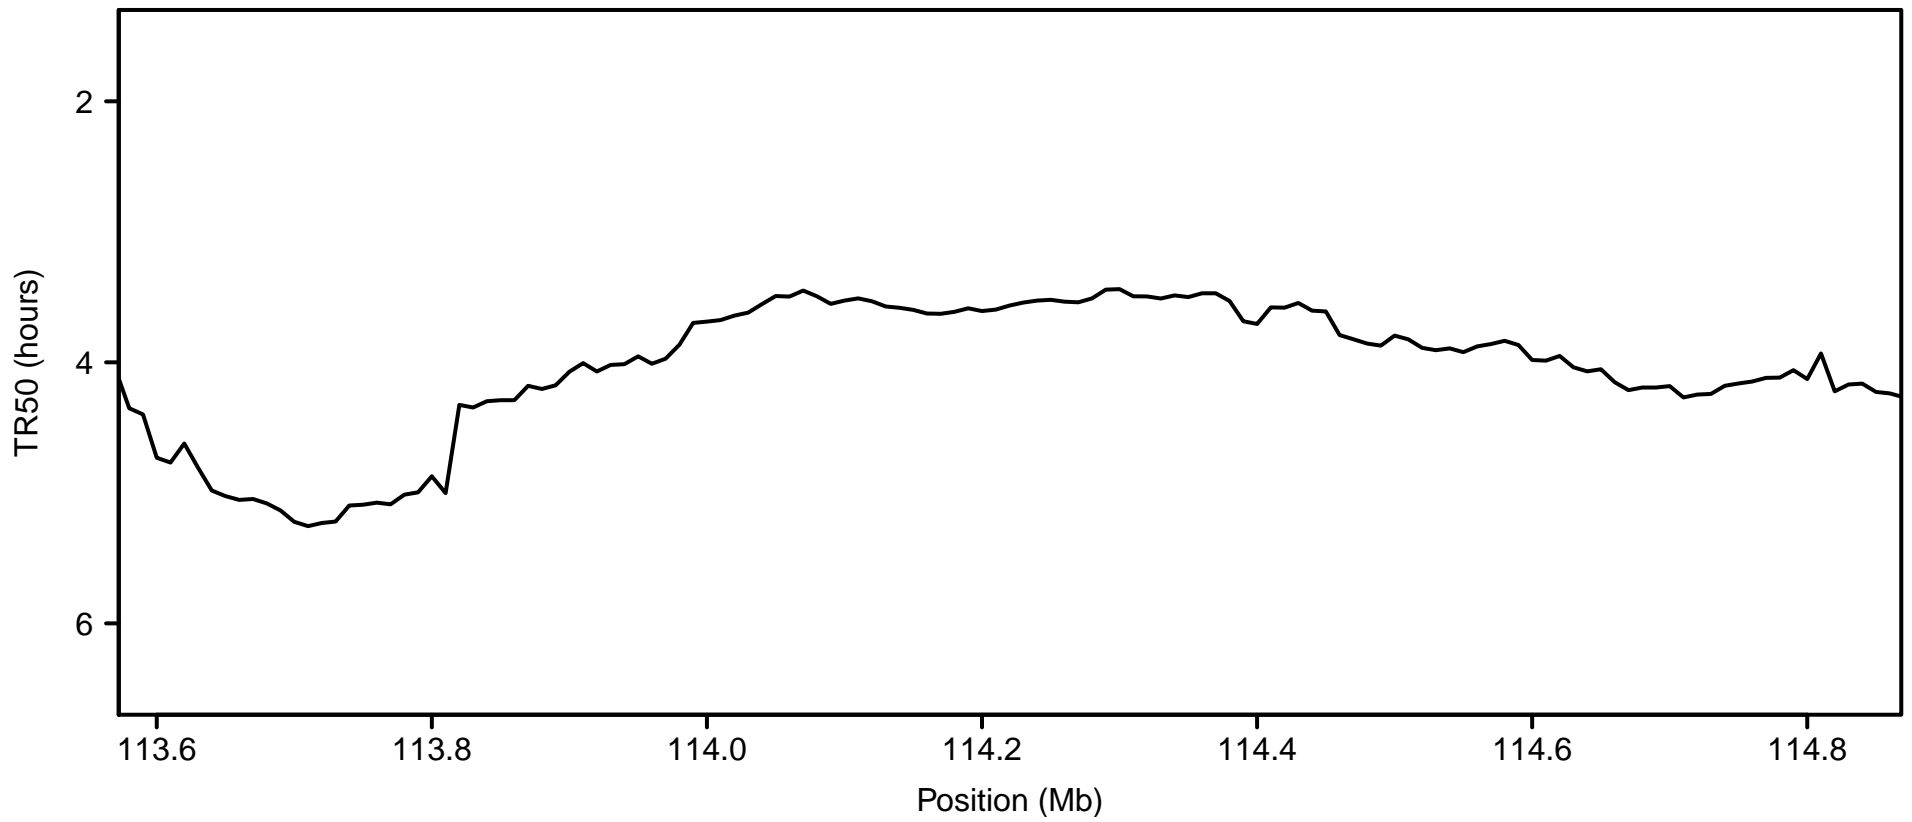

Apparent replication speed

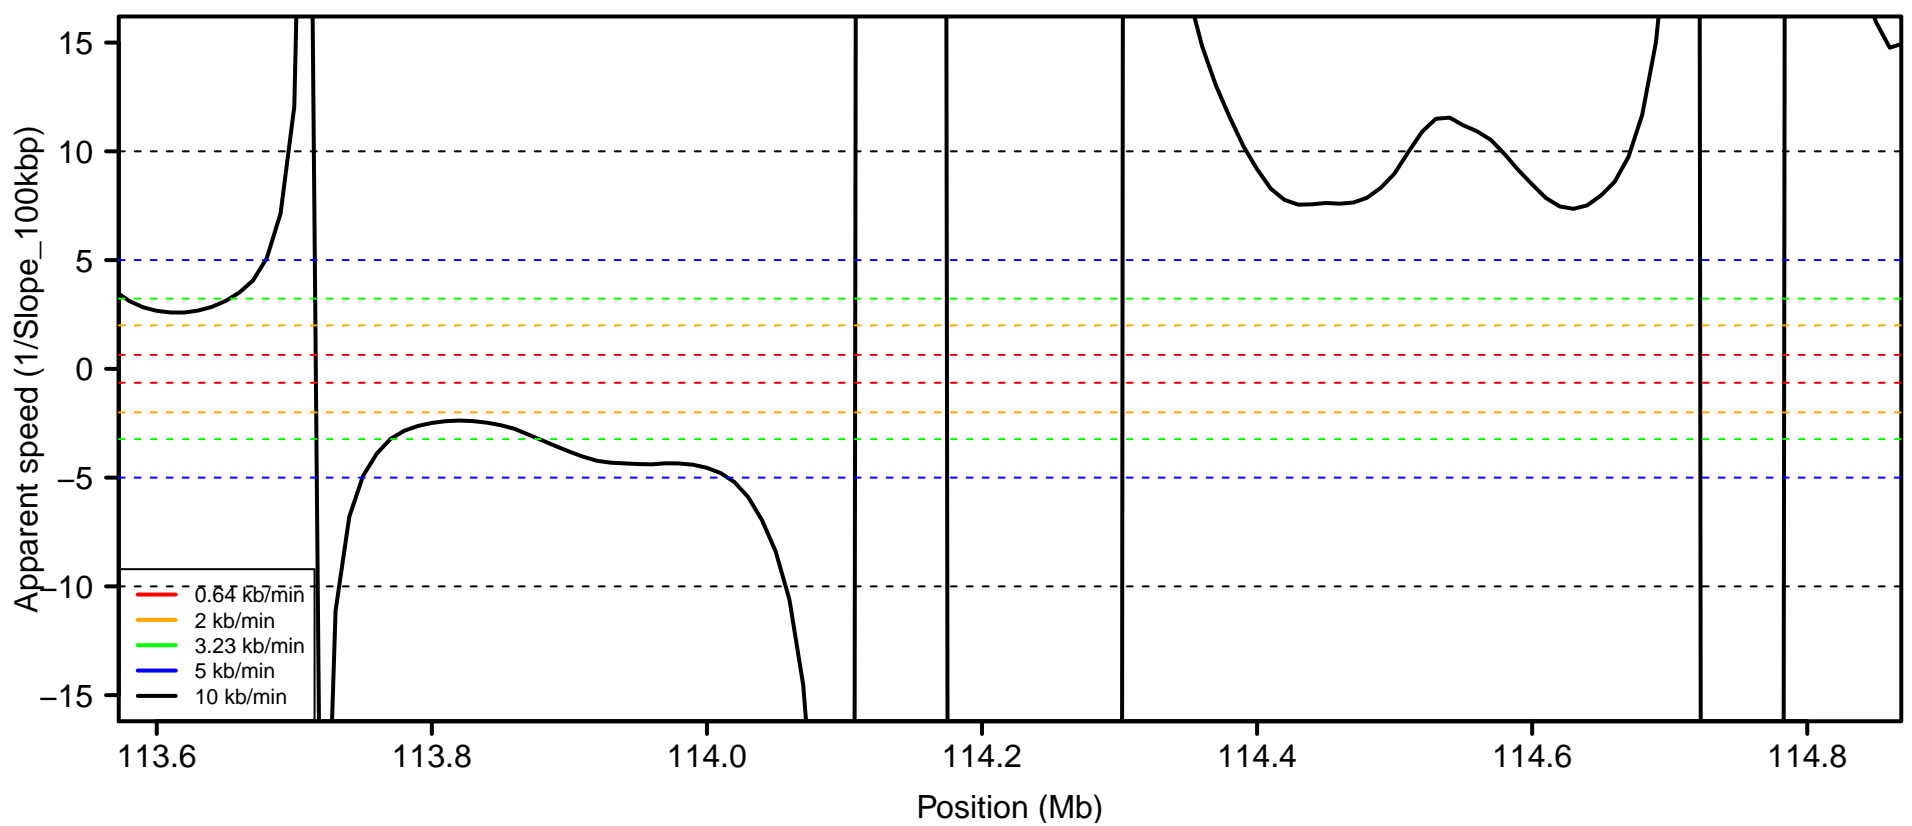



# Replication Timing Vs Encode Origin data, ENm001 (chr7:115597756\_117475182)

### Annotation

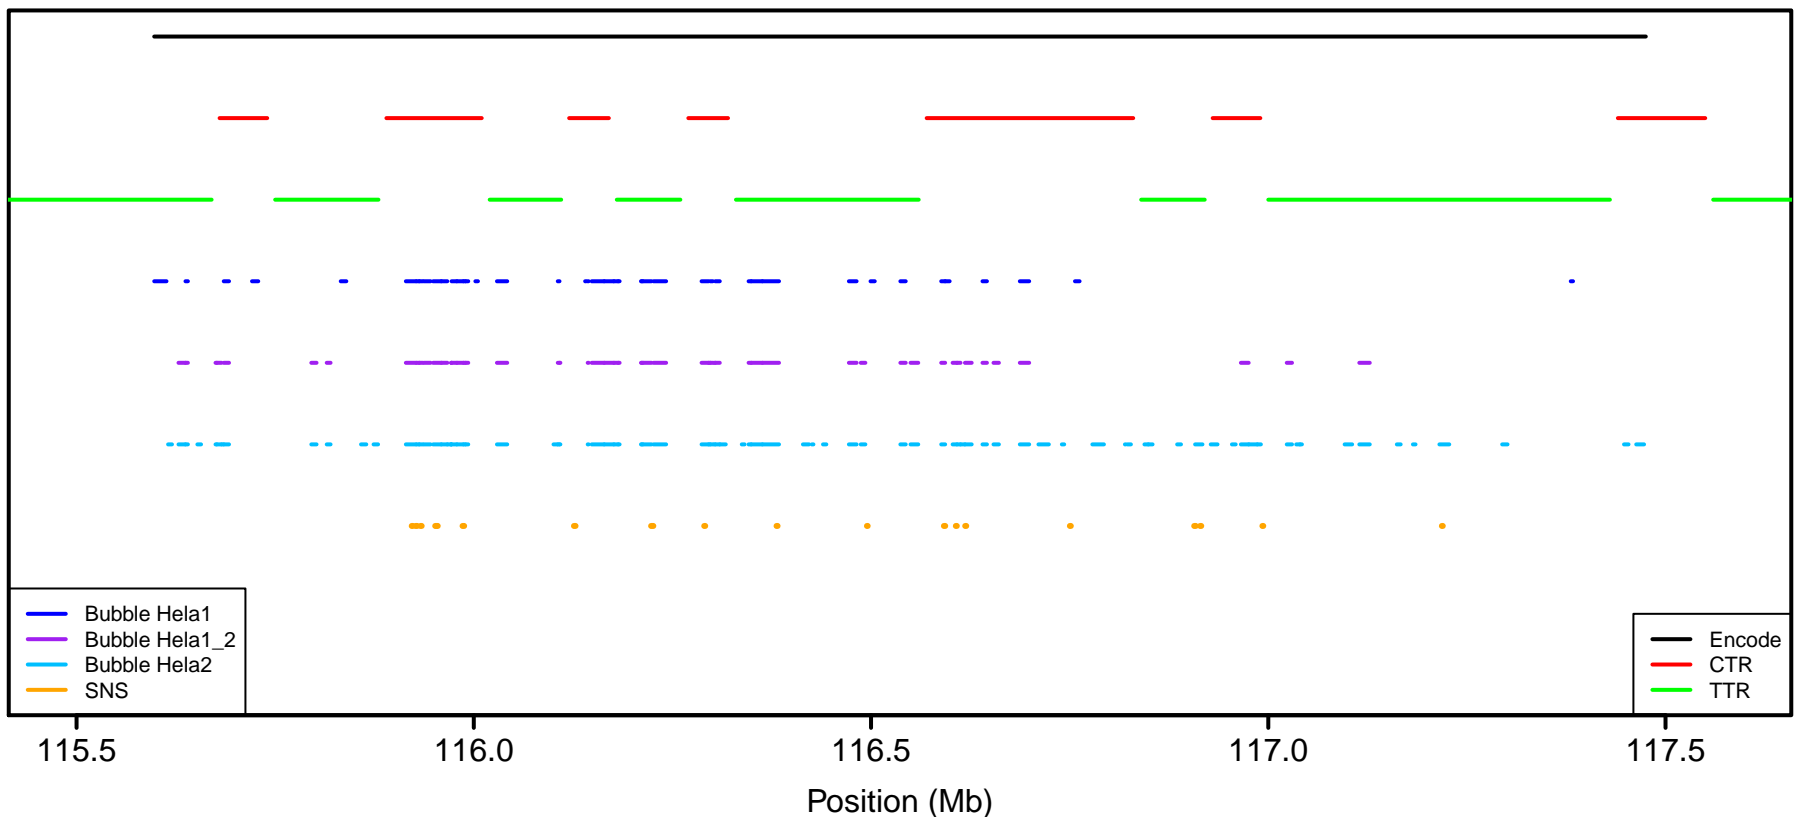

### Timing of Hela

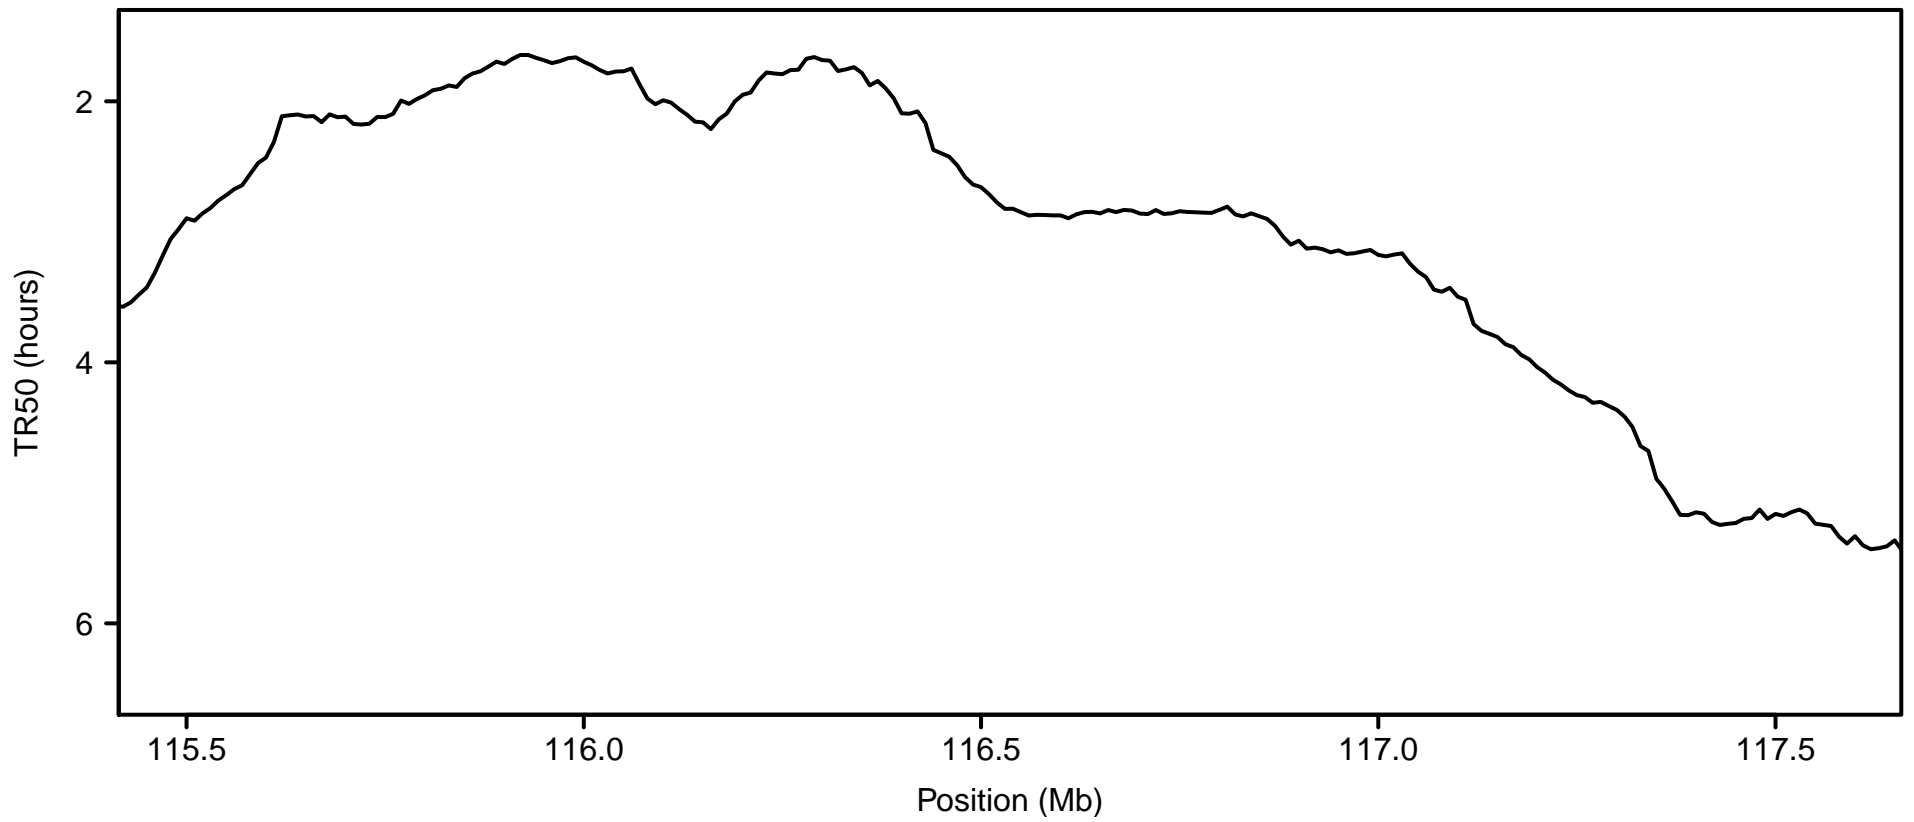

### Apparent replication speed

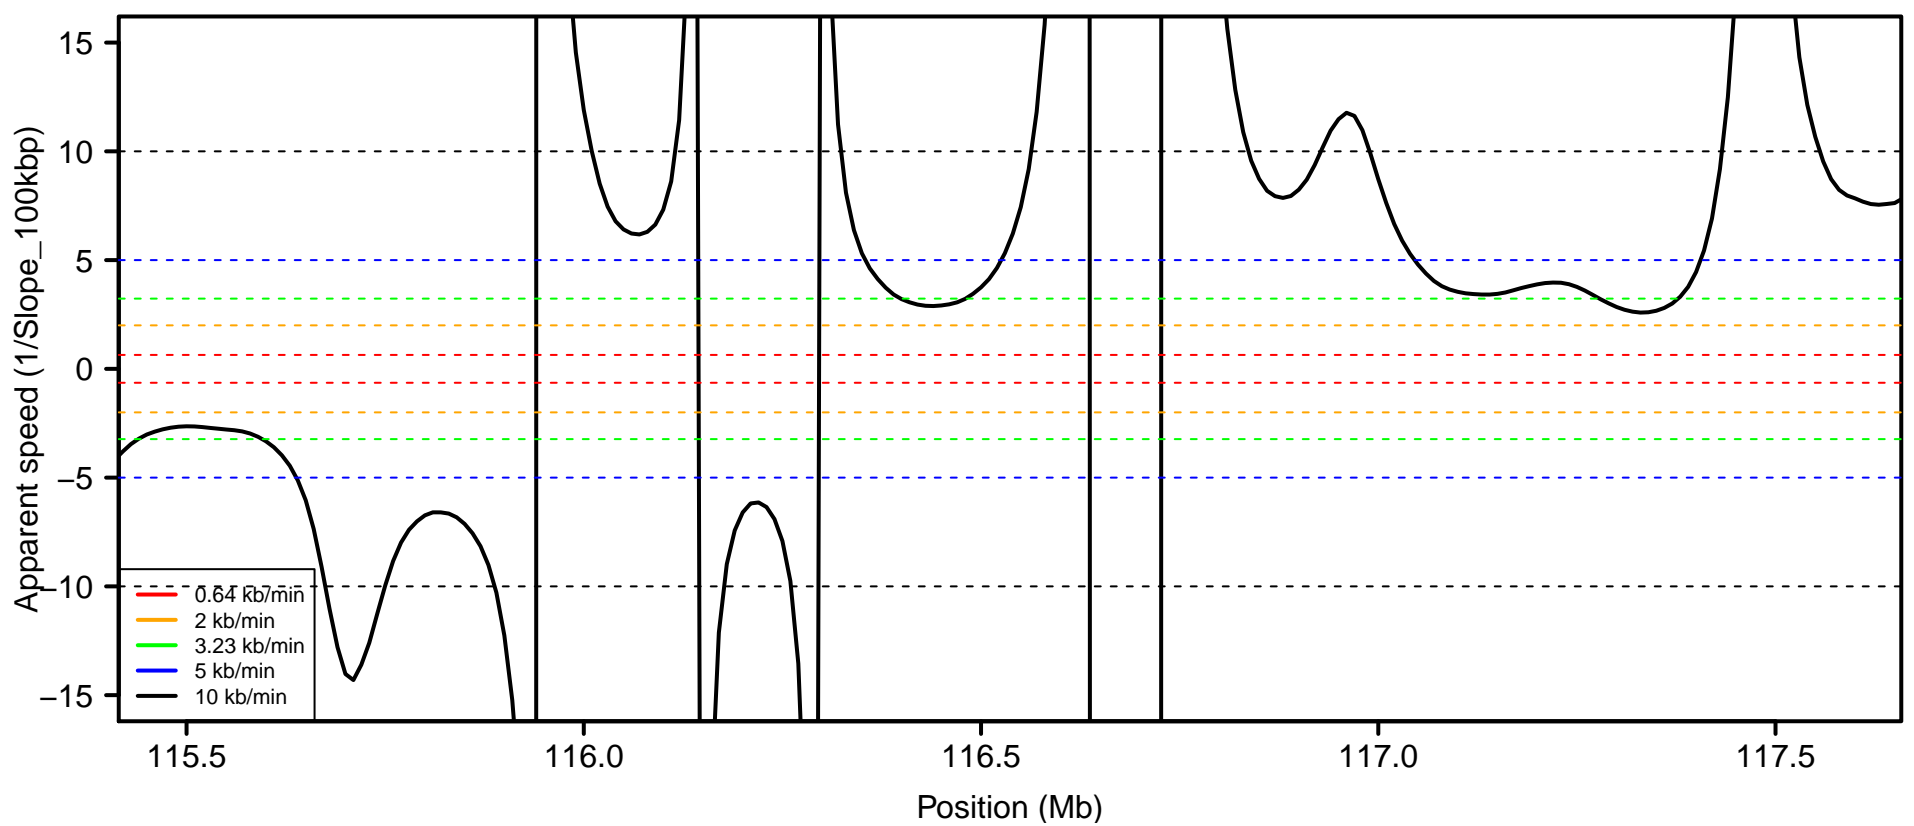

# Replication Timing Vs Encode Origin data, ENm014 (chr7:125865891\_127029088)

Annotation

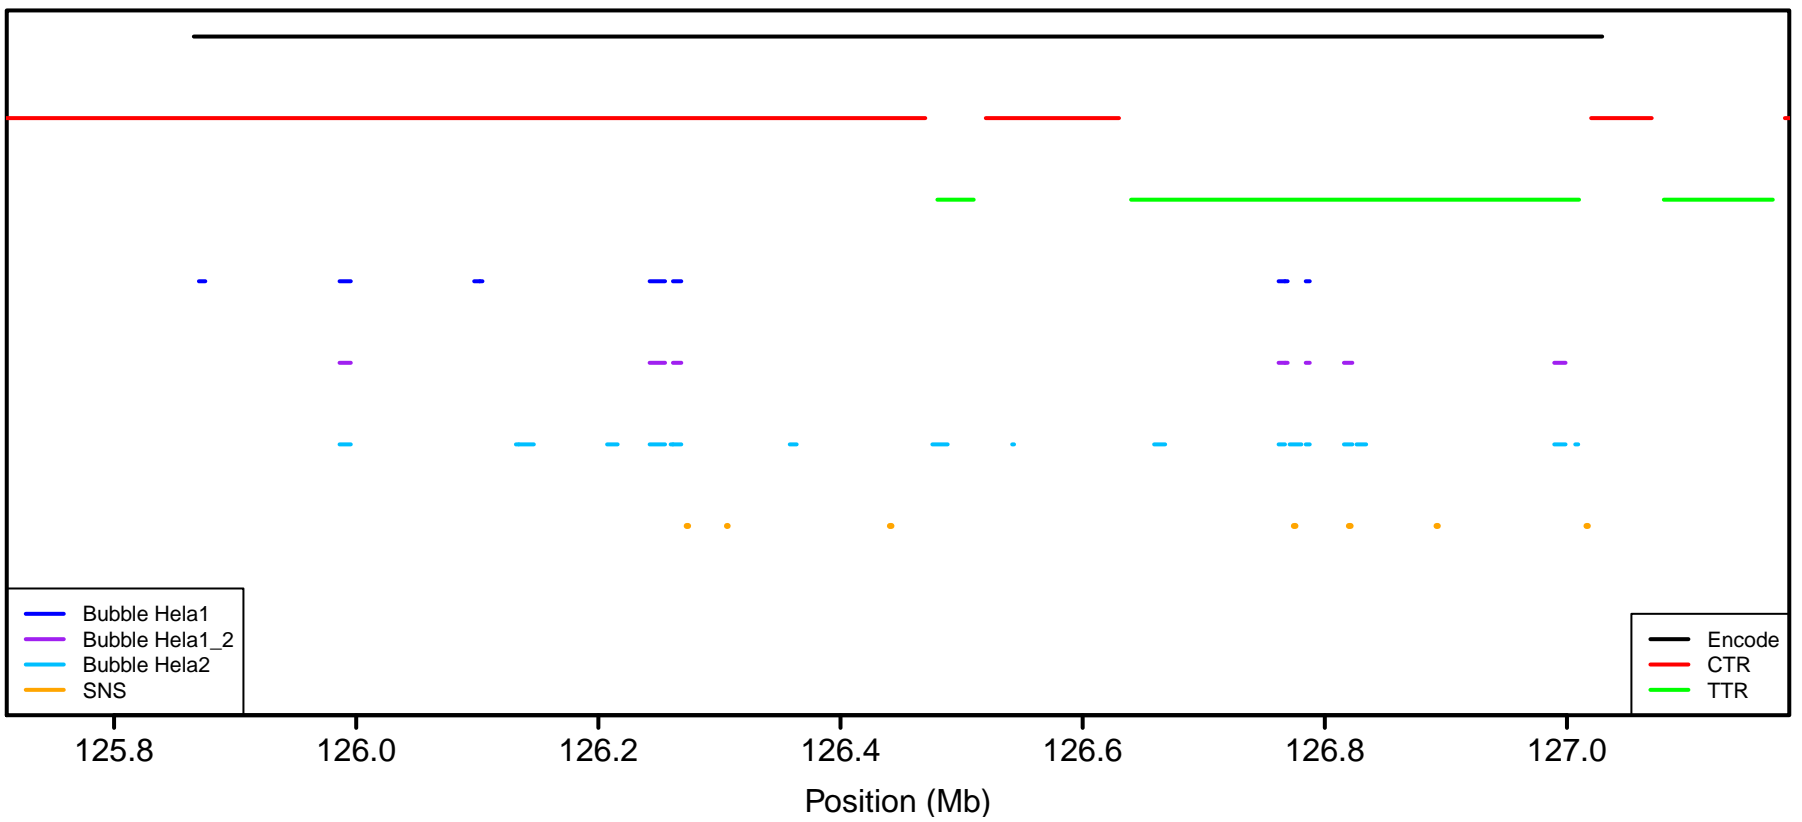

Timing of Hela

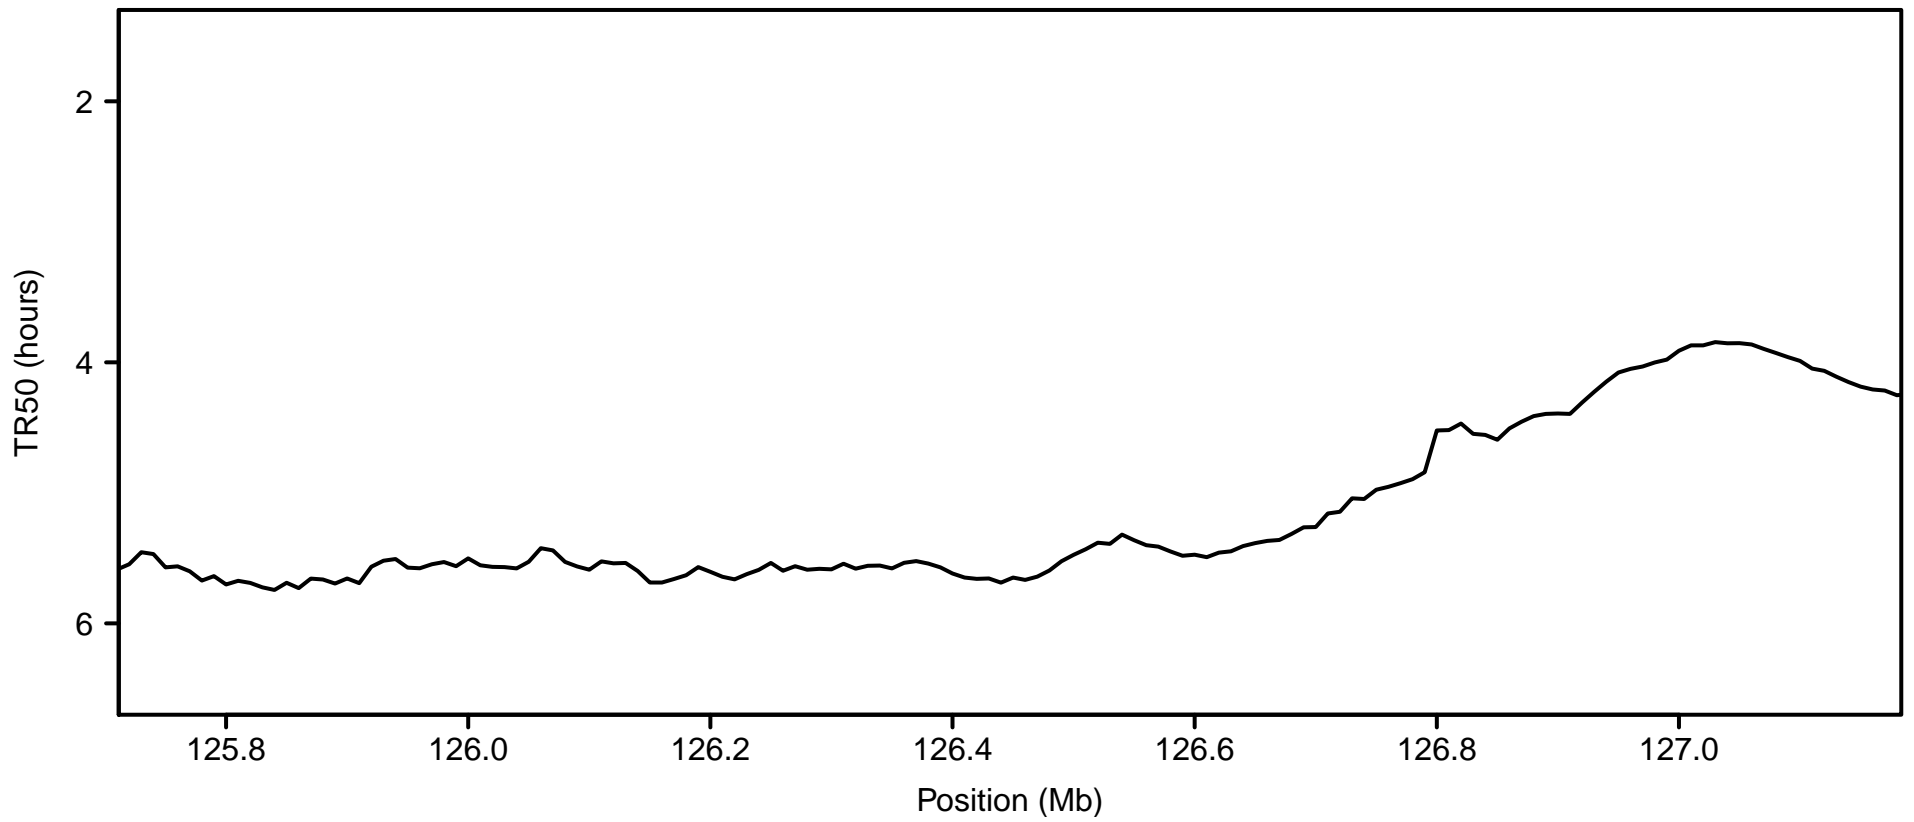

Apparent replication speed

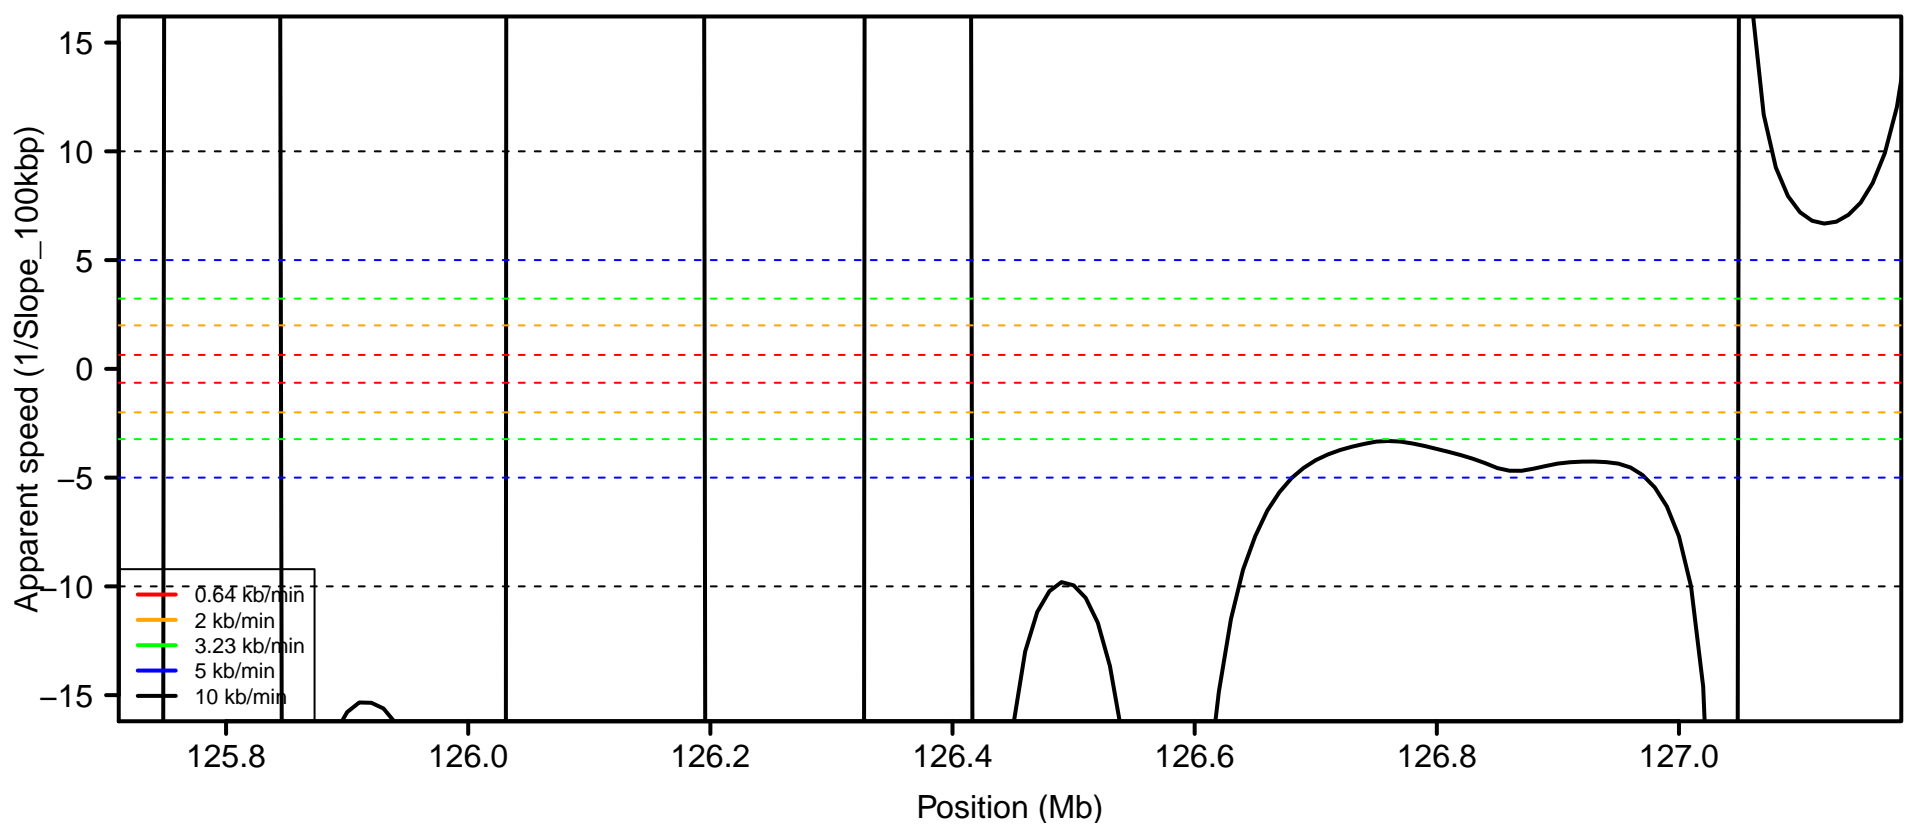

# Replication Timing Vs Encode Origin data, ENr321 (chr8:11882220\_119382220)

Annotation

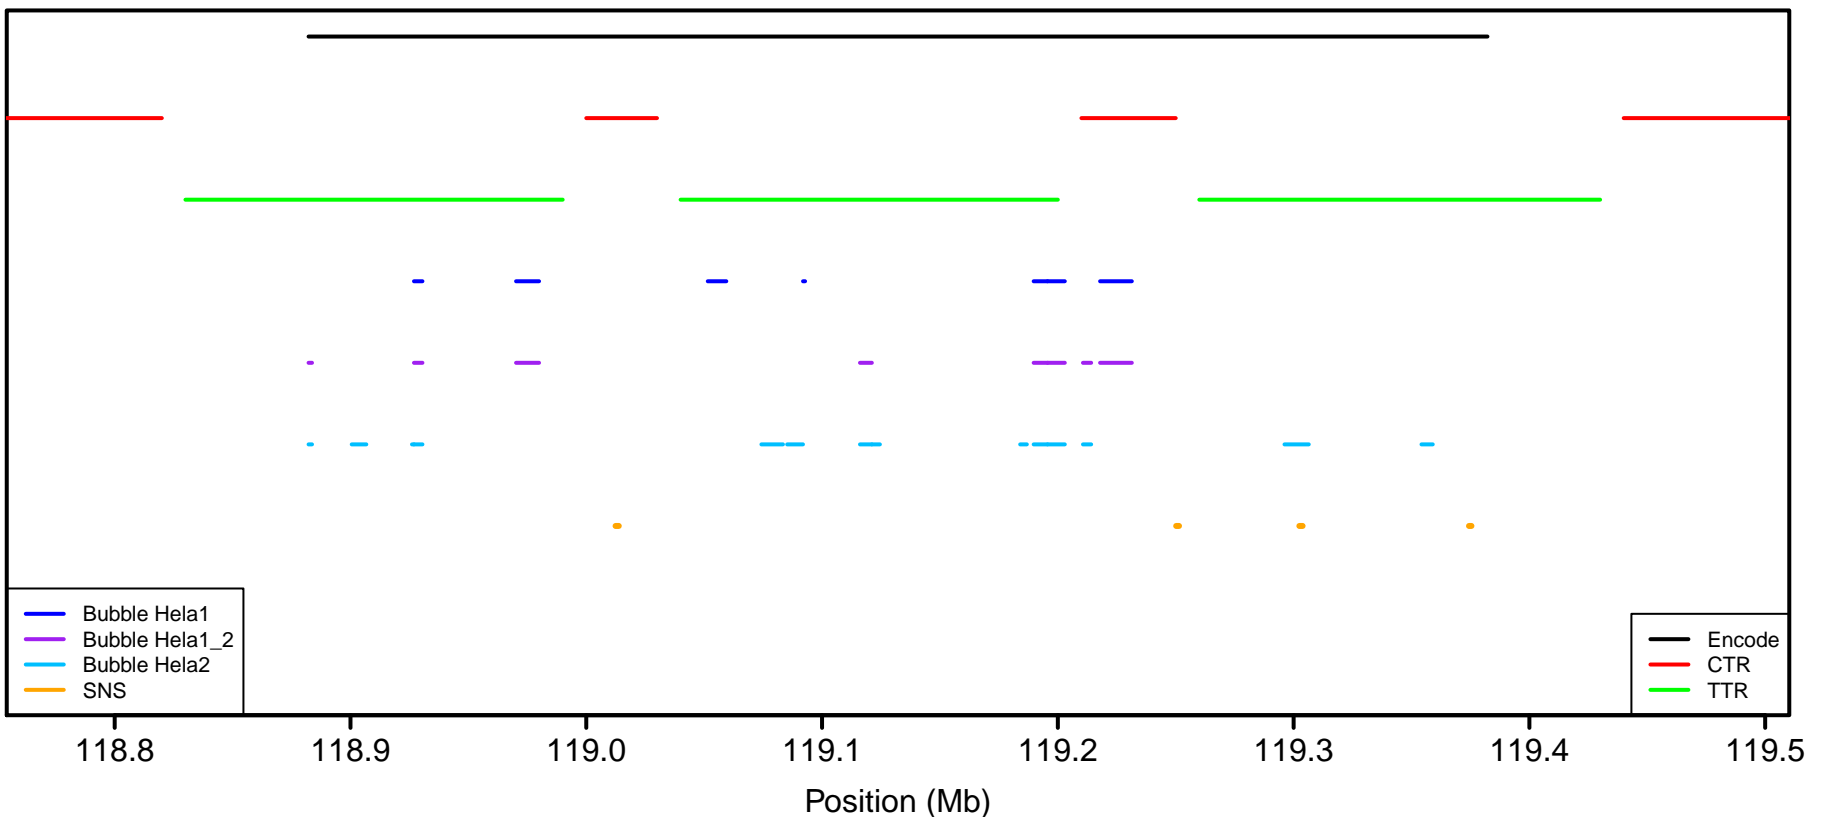

Timing of HeLa

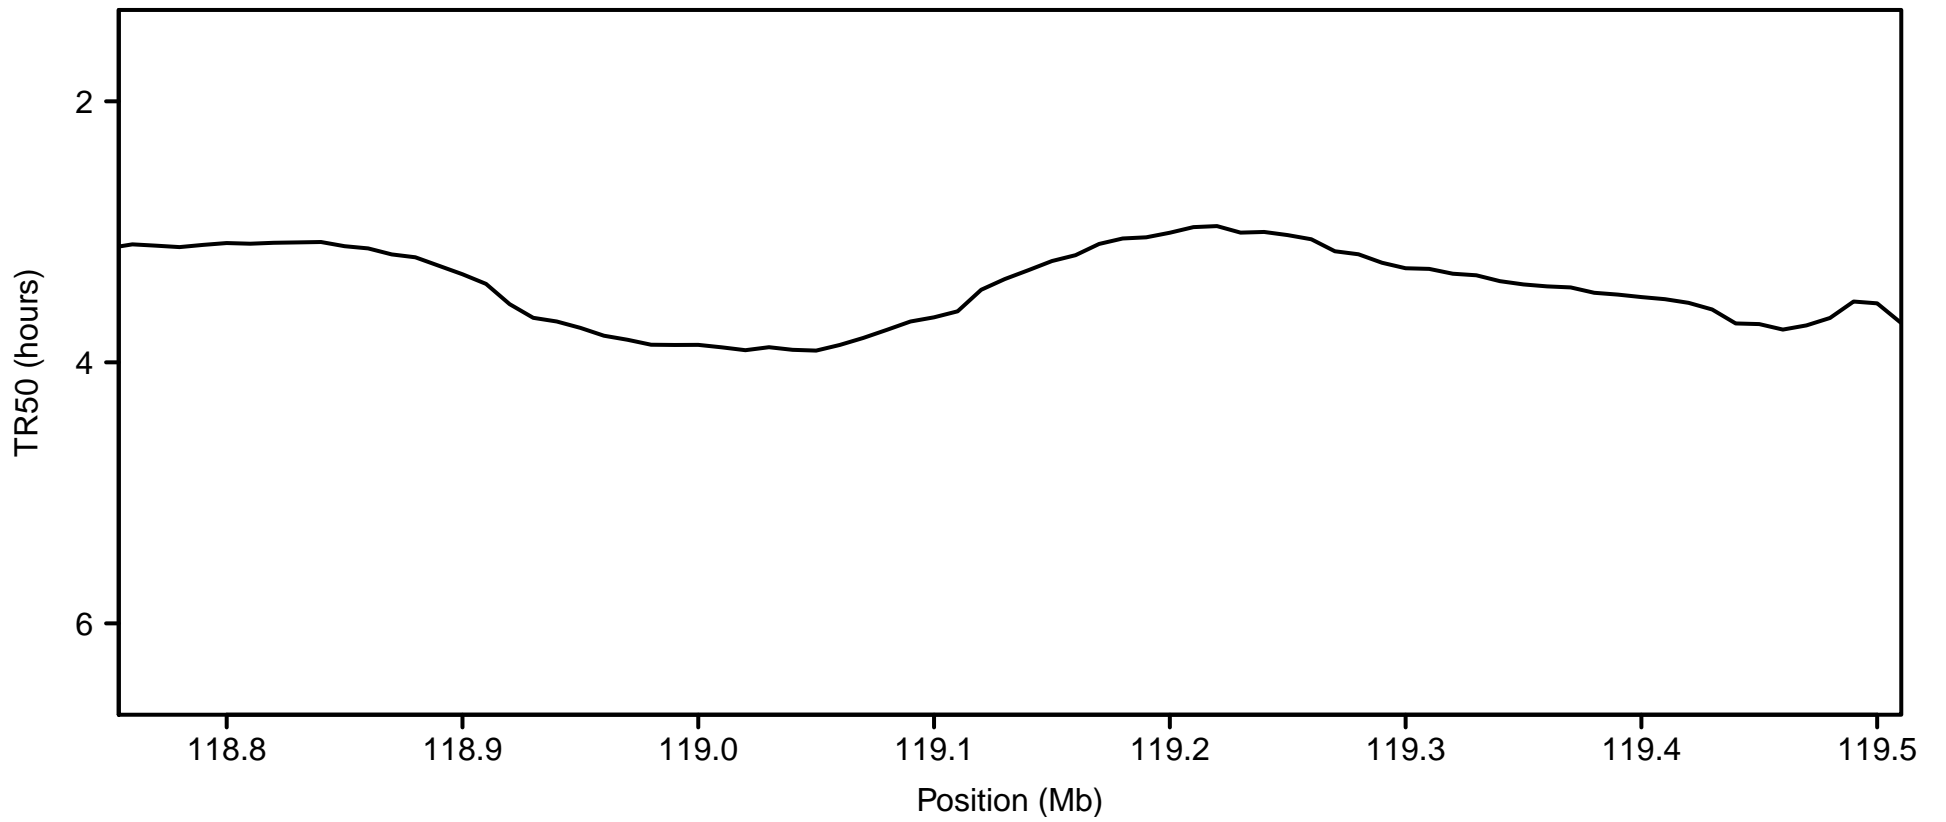

Apparent replication speed

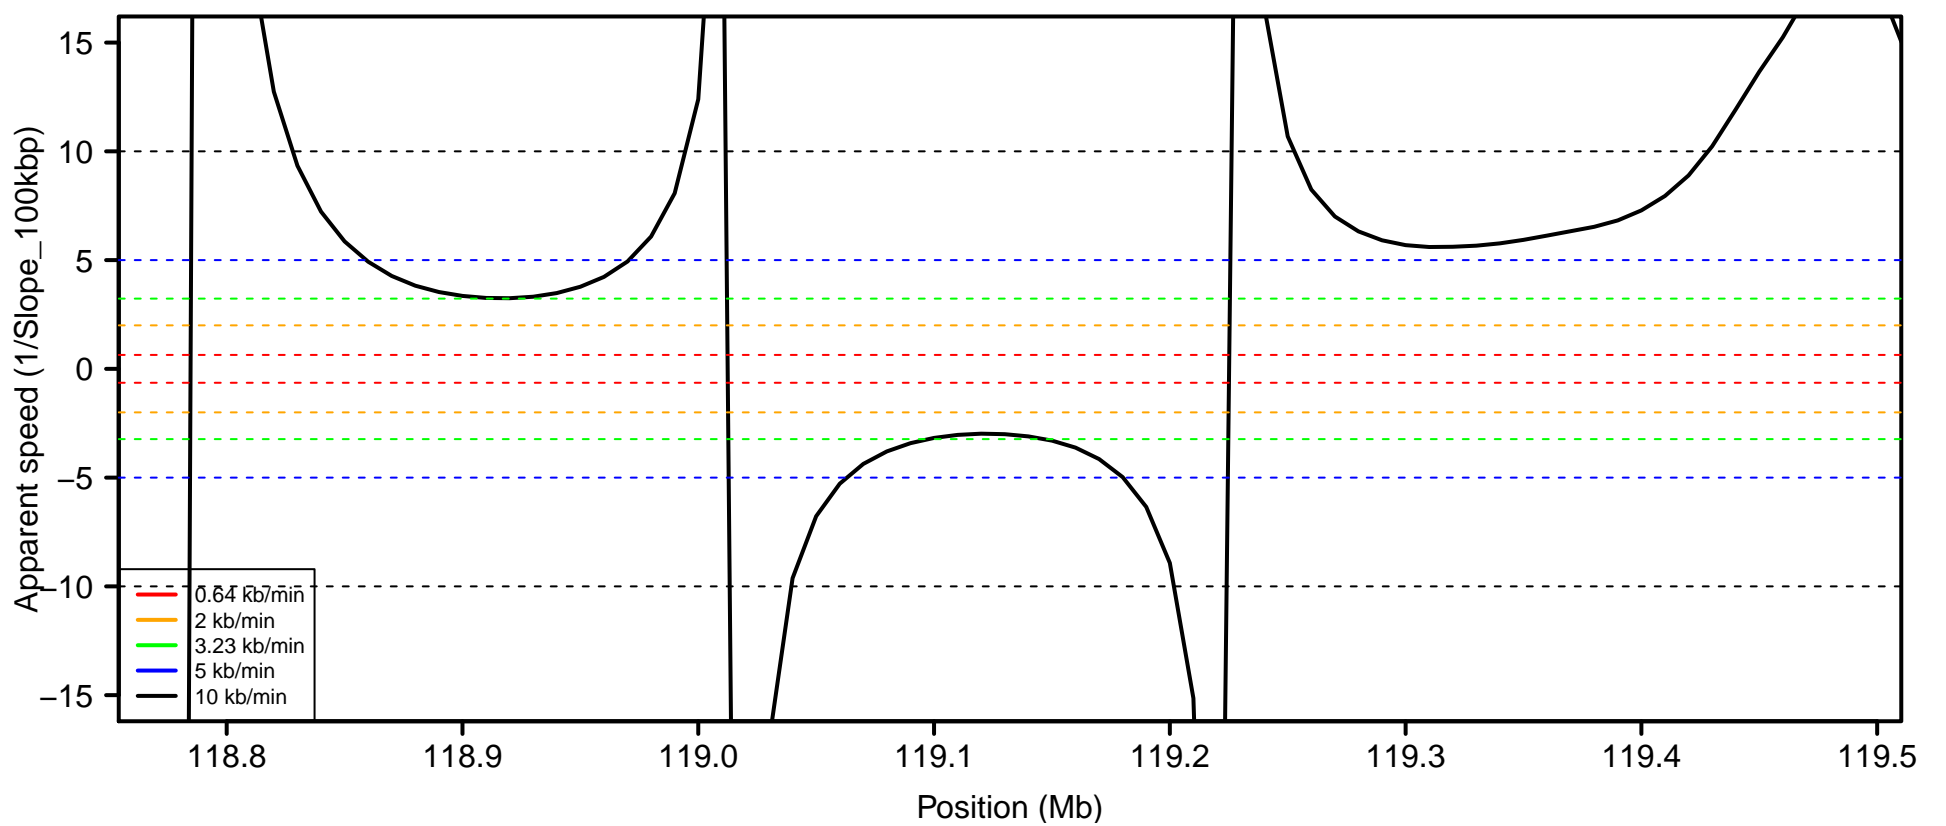

# Replication Timing Vs Encode Origin data, ENr232 (chr9:130725122\_131225122)

Annotation

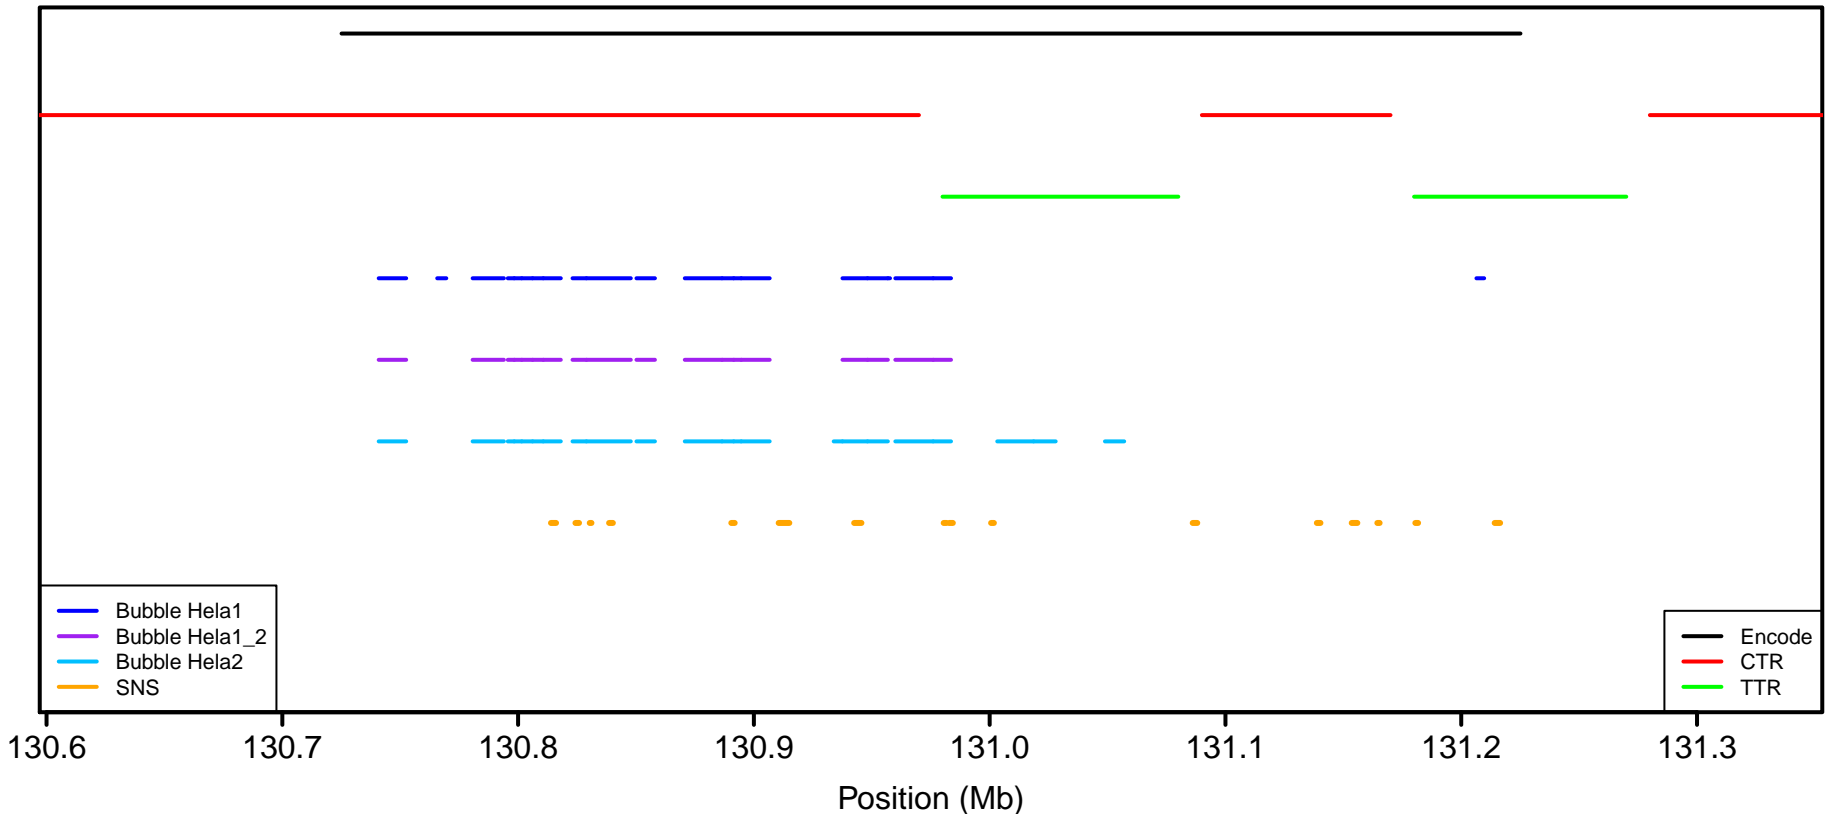

Timing of HeLa

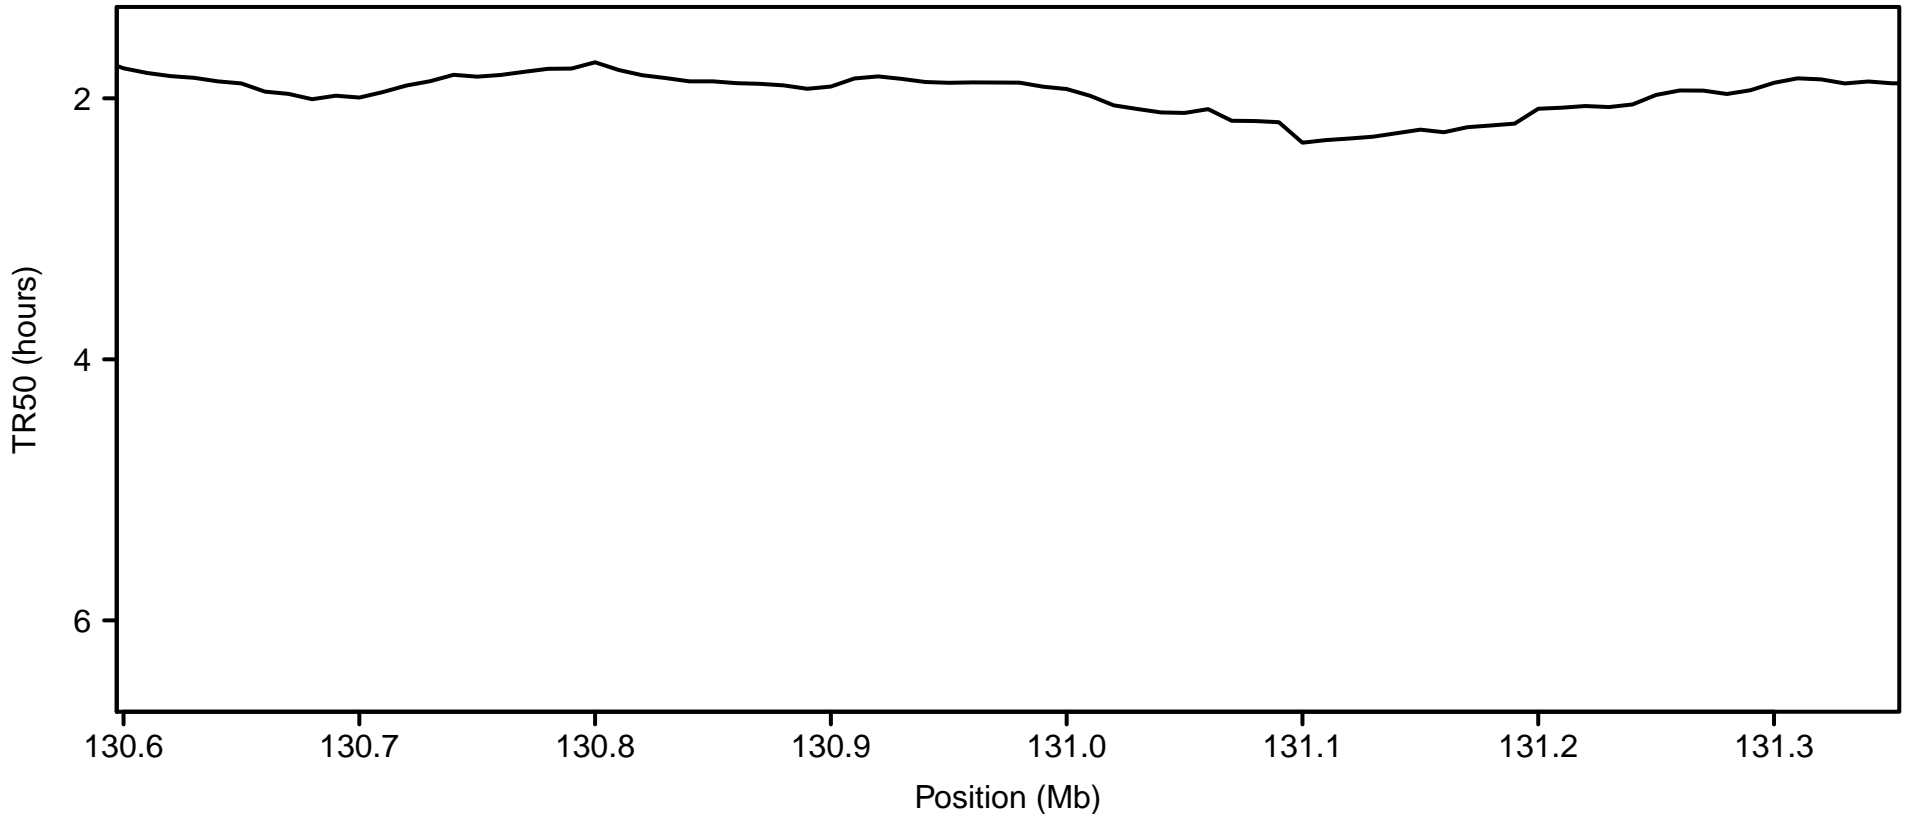

Apparent replication speed

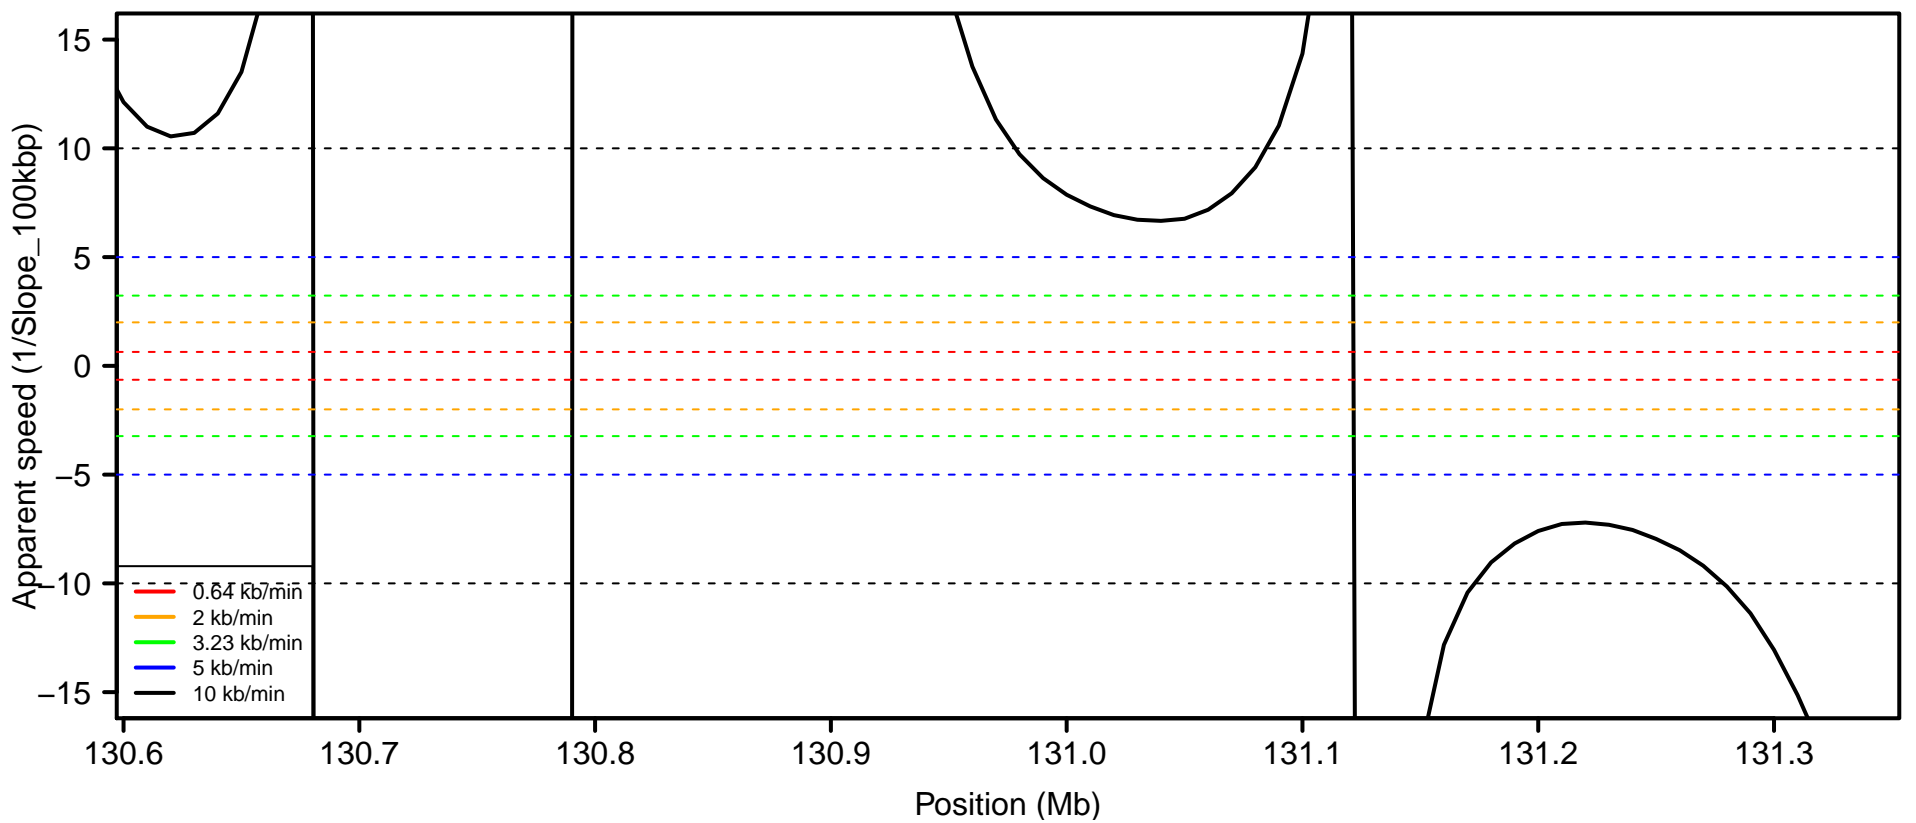

# Replication Timing Vs Encode Origin data, ENr114 (chr10:55153818\_55653818)

Annotation

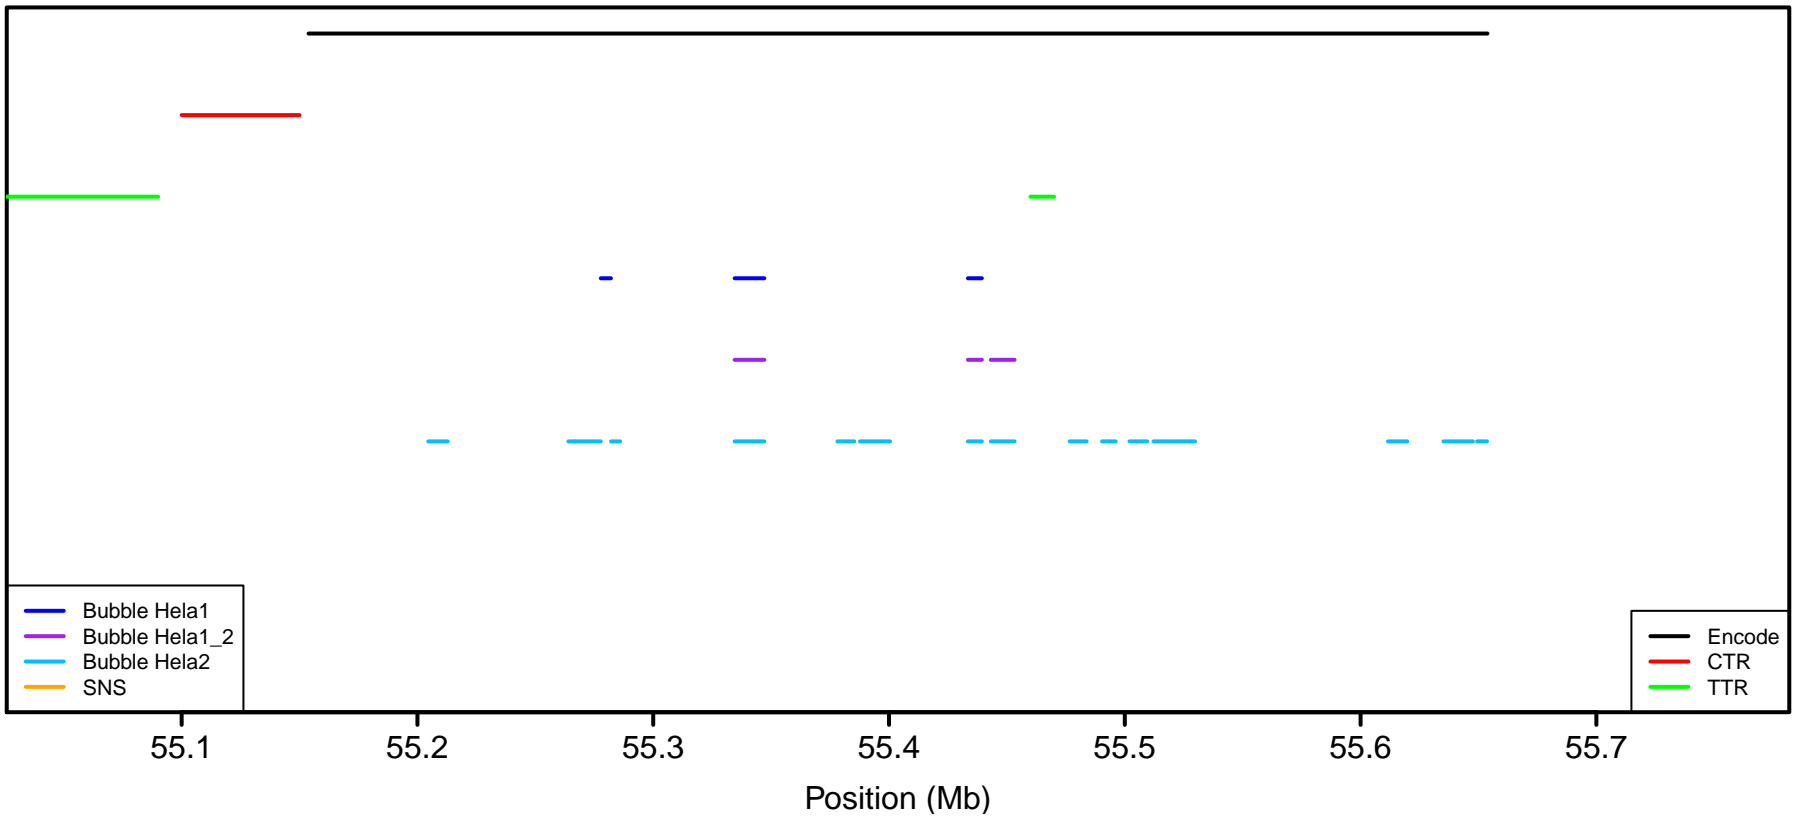

Timing of Hela

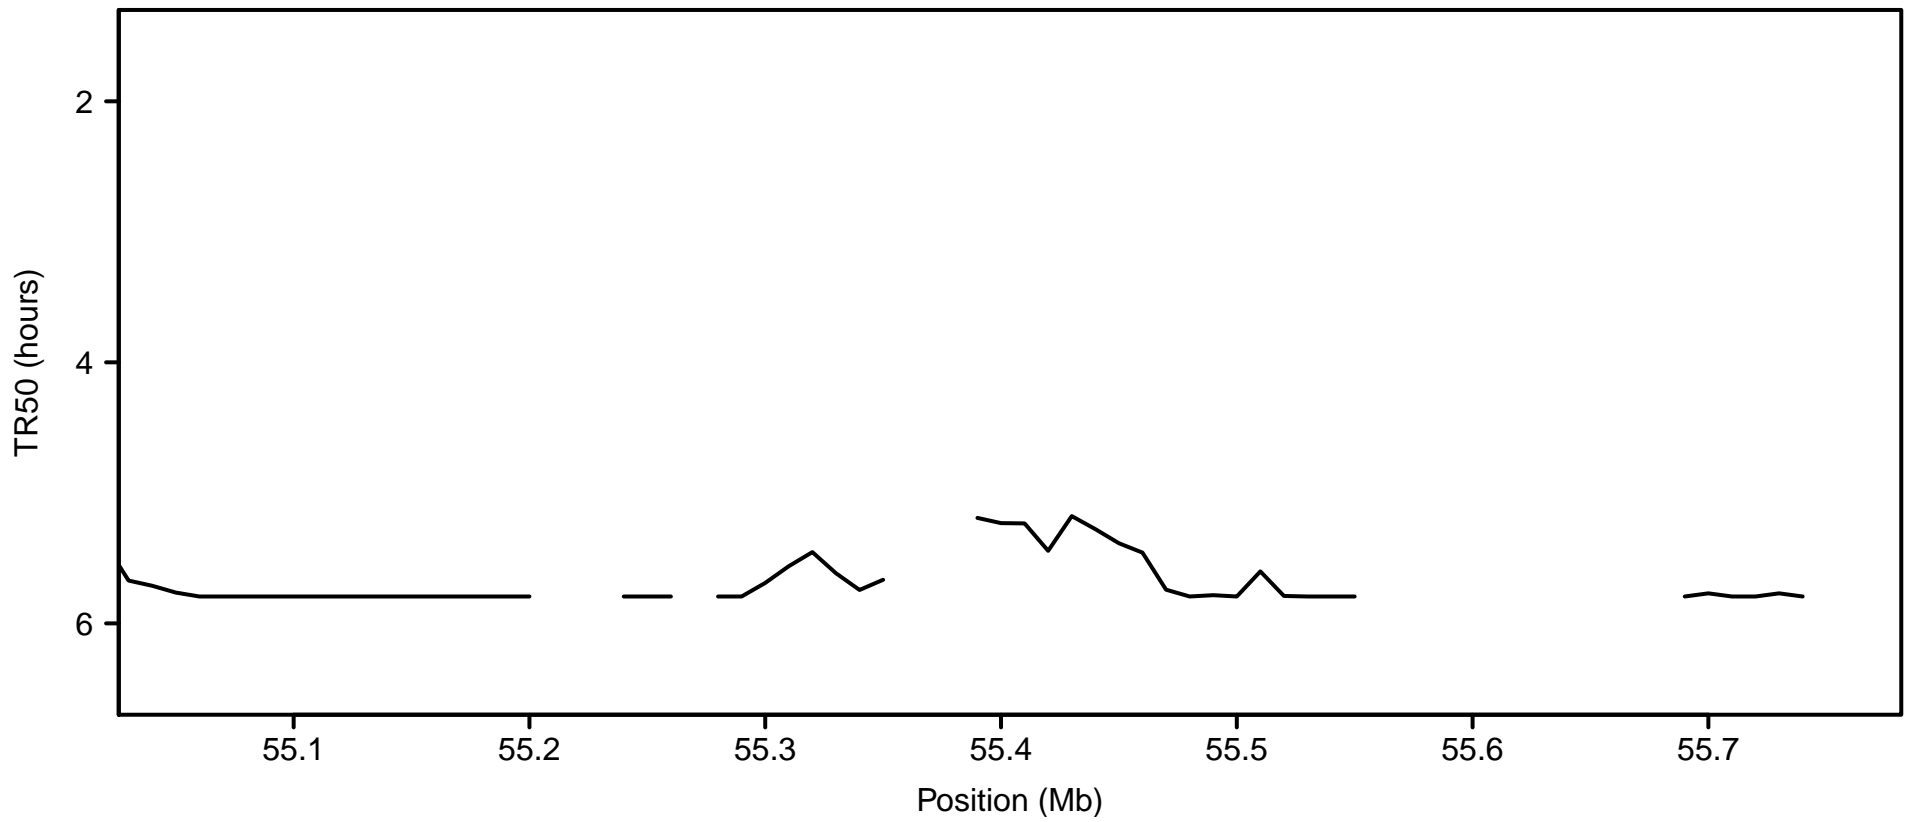

Apparent replication speed

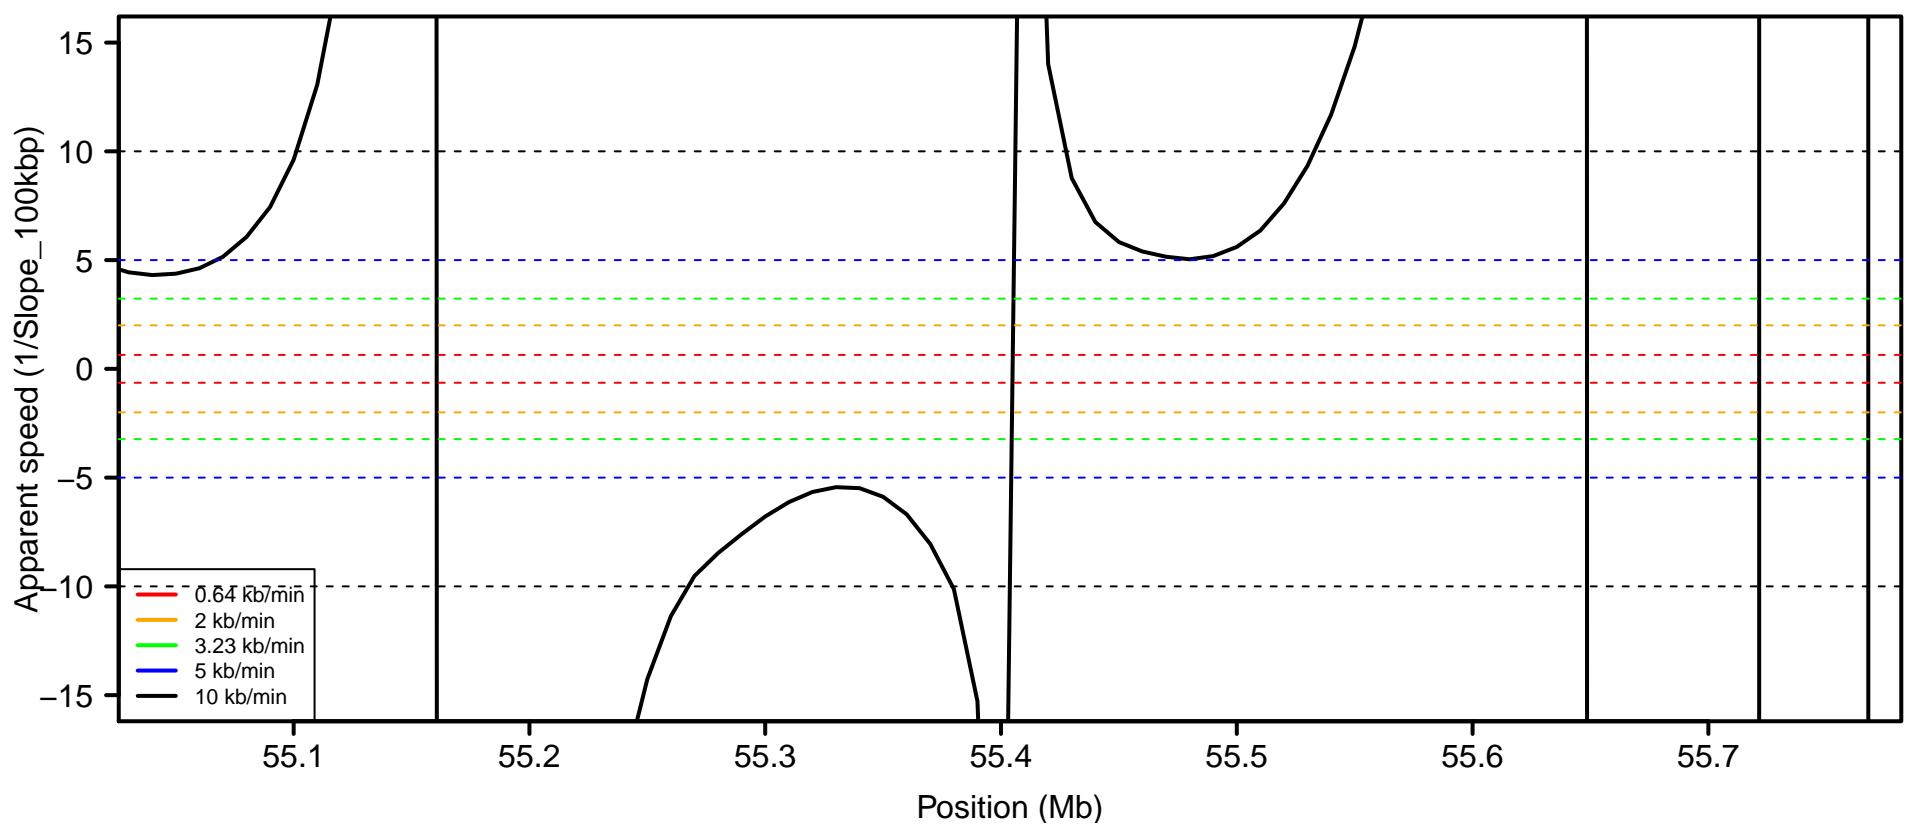

# Replication Timing Vs Encode Origin data, ENm011 (chr11:1699991\_2306039)

Annotation

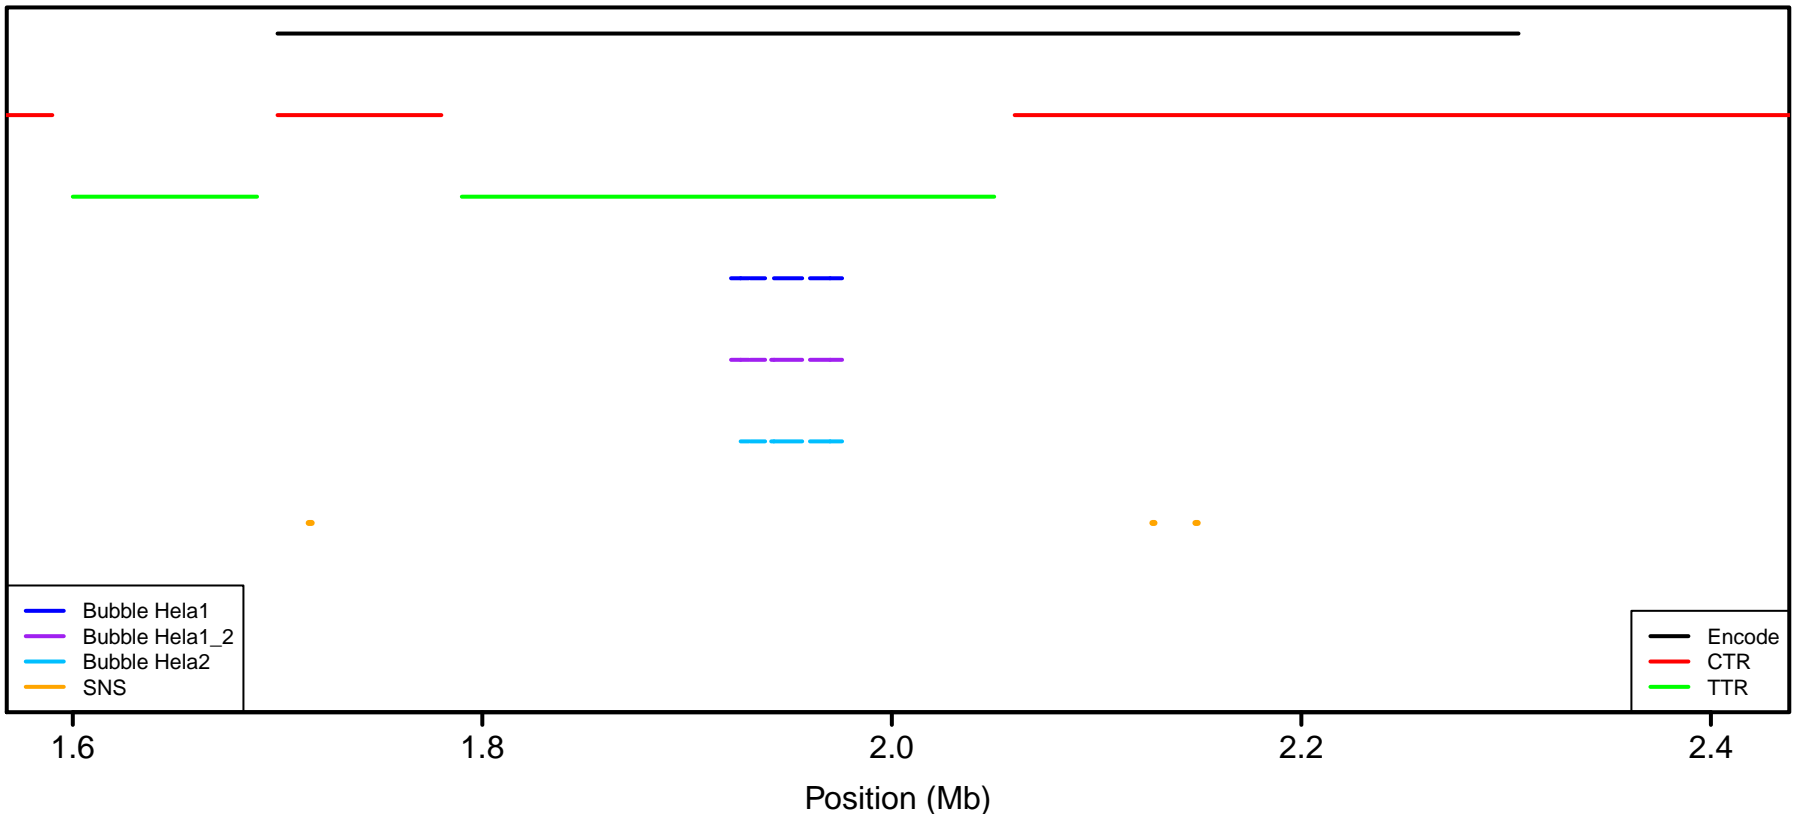

Timing of Hela

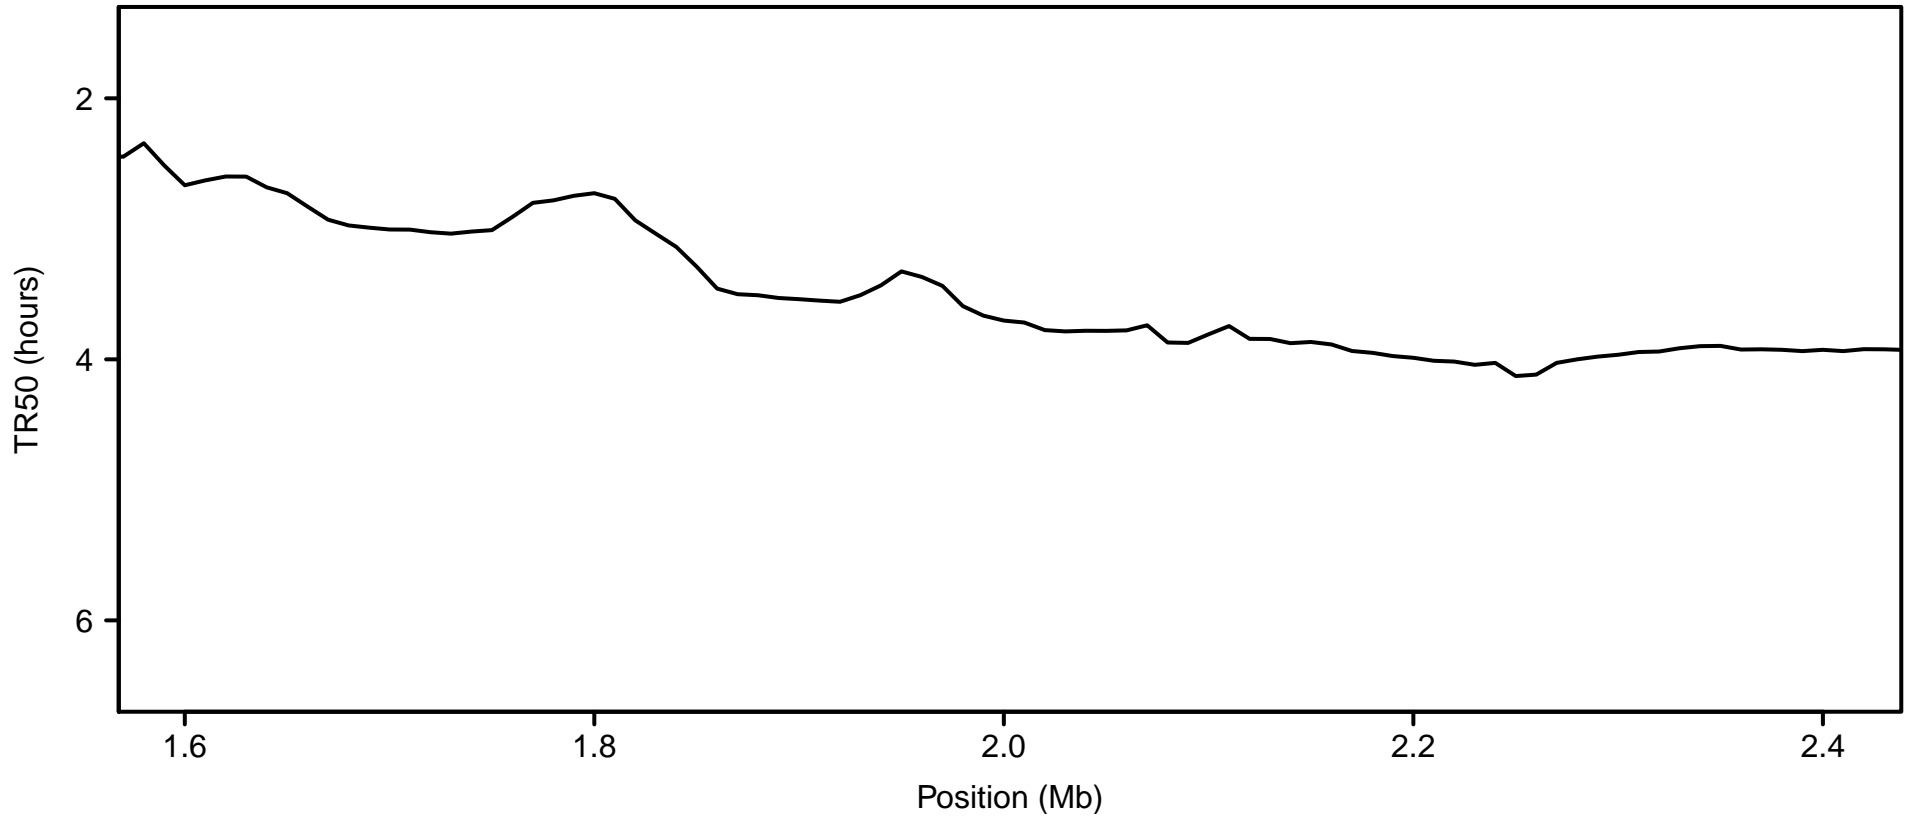

Apparent replication speed

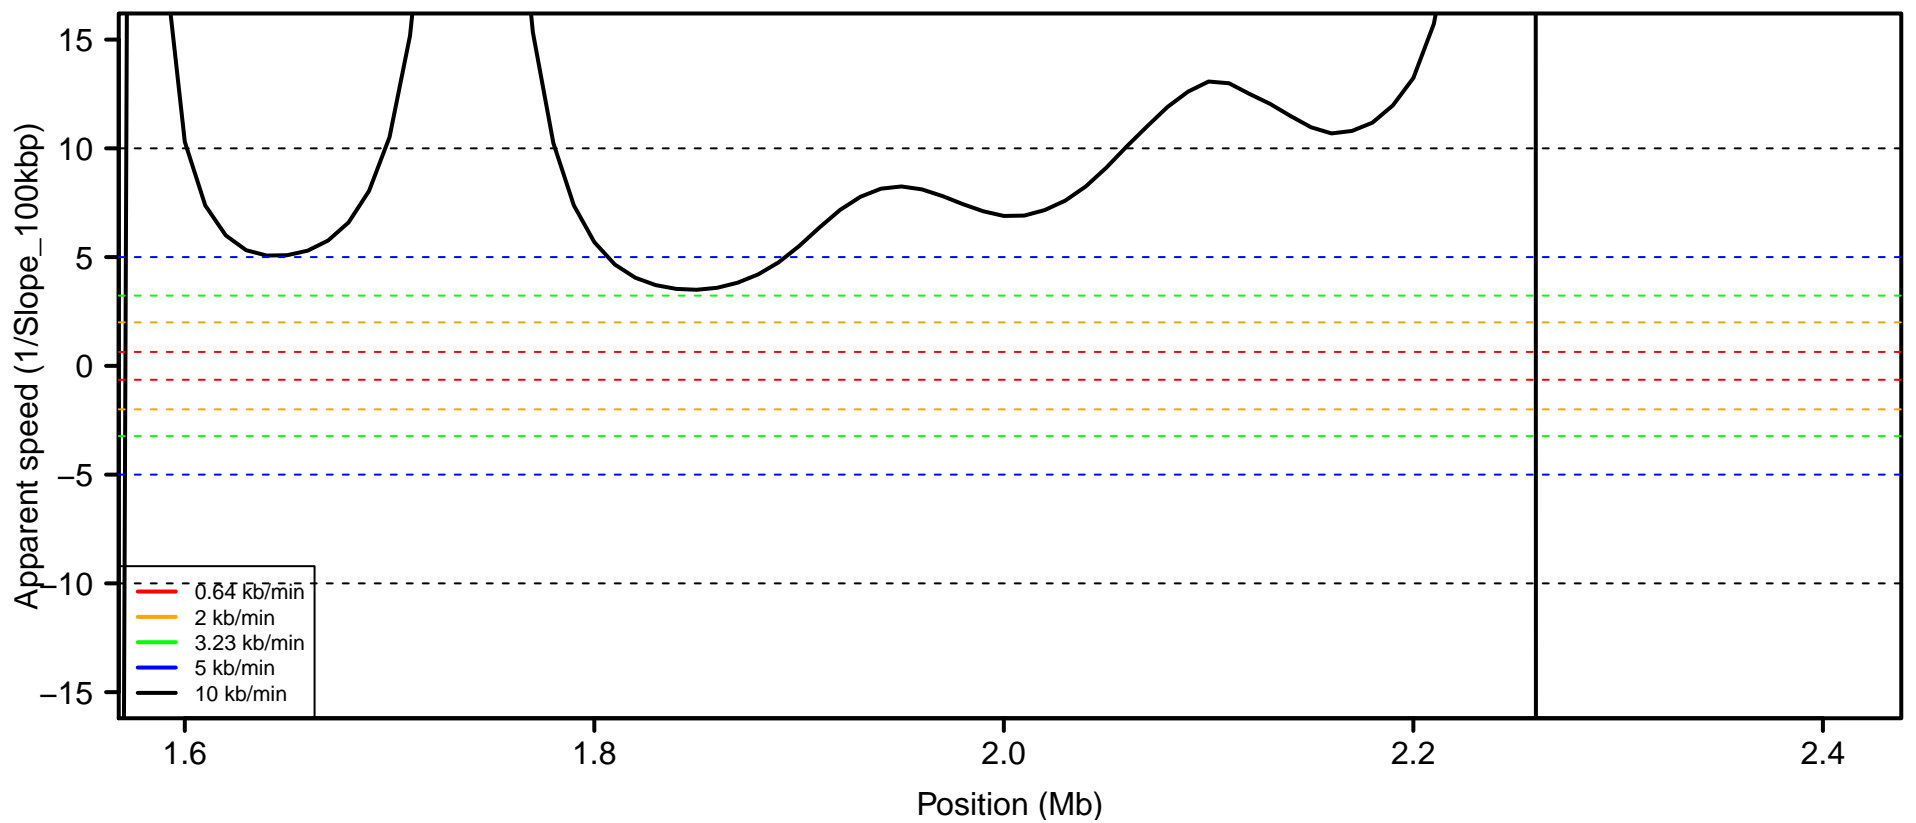

# Replication Timing Vs Encode Origin data, ENm009 (chr11:4730995\_5732587)

Annotation

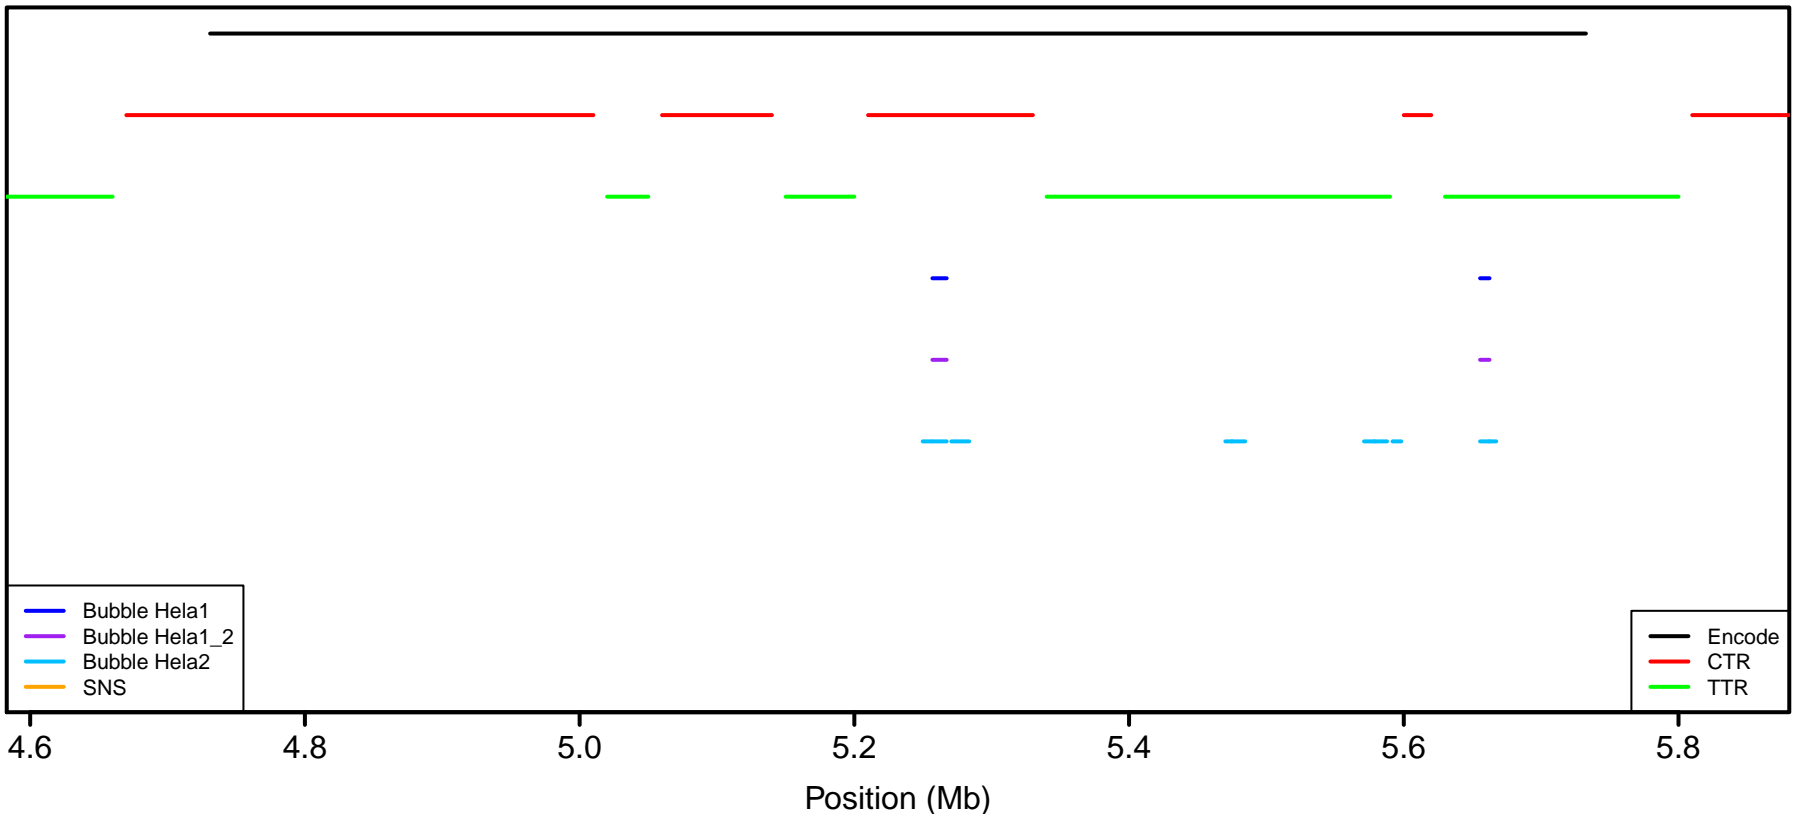

Timing of HeLa

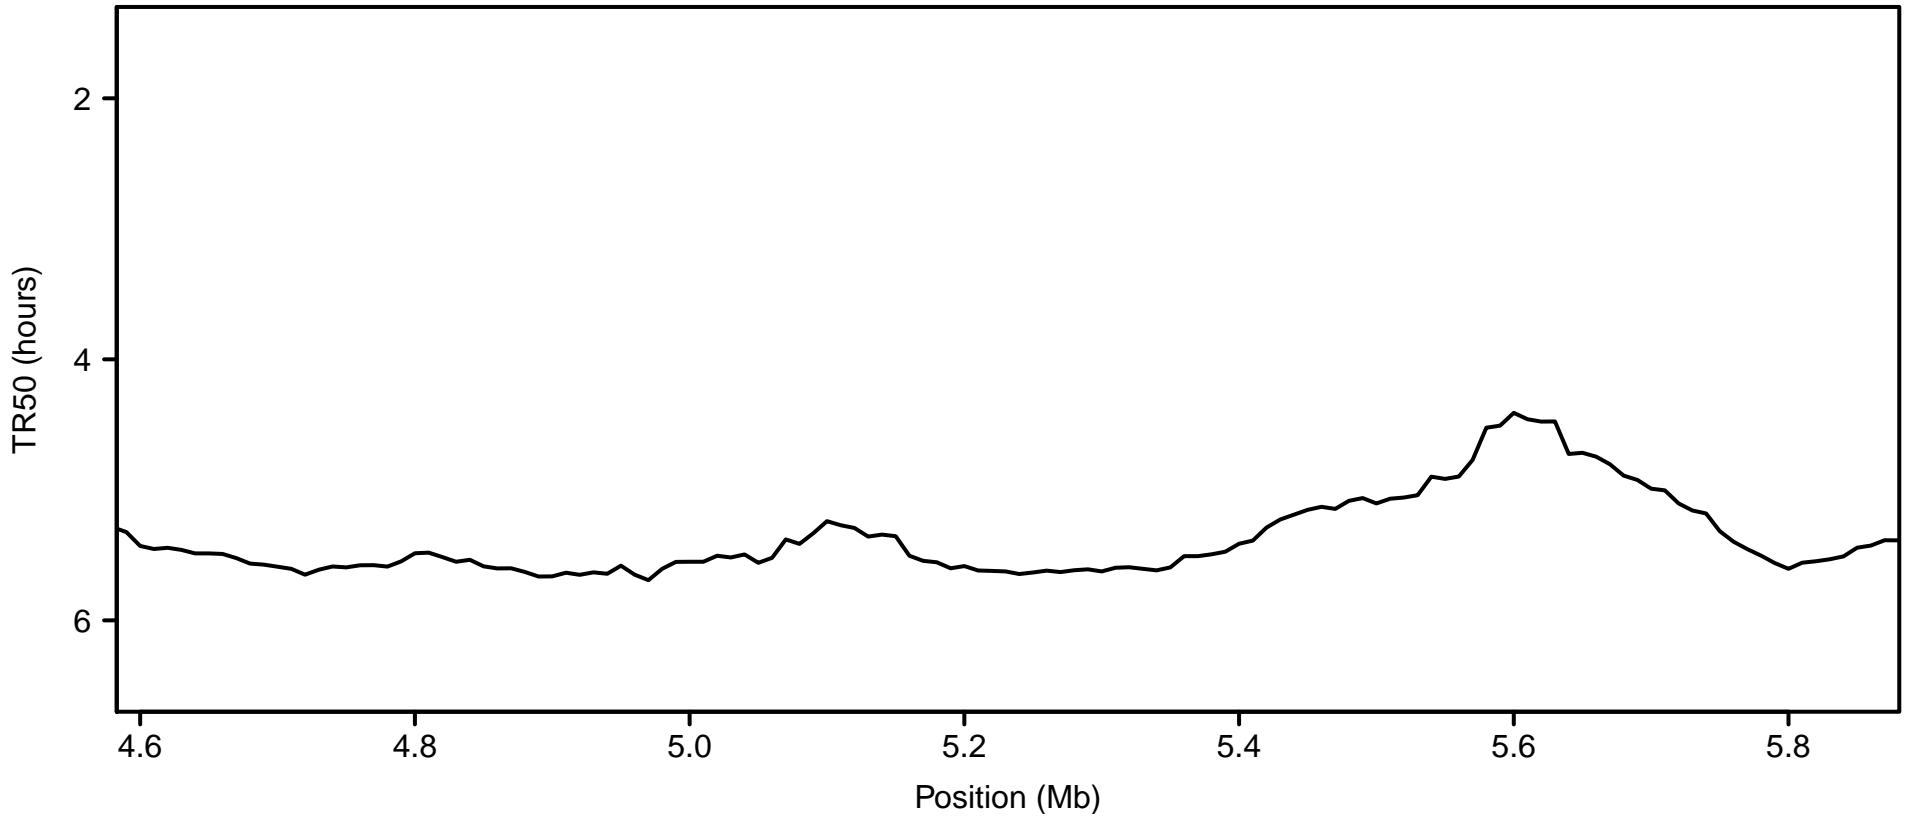

Apparent replication speed

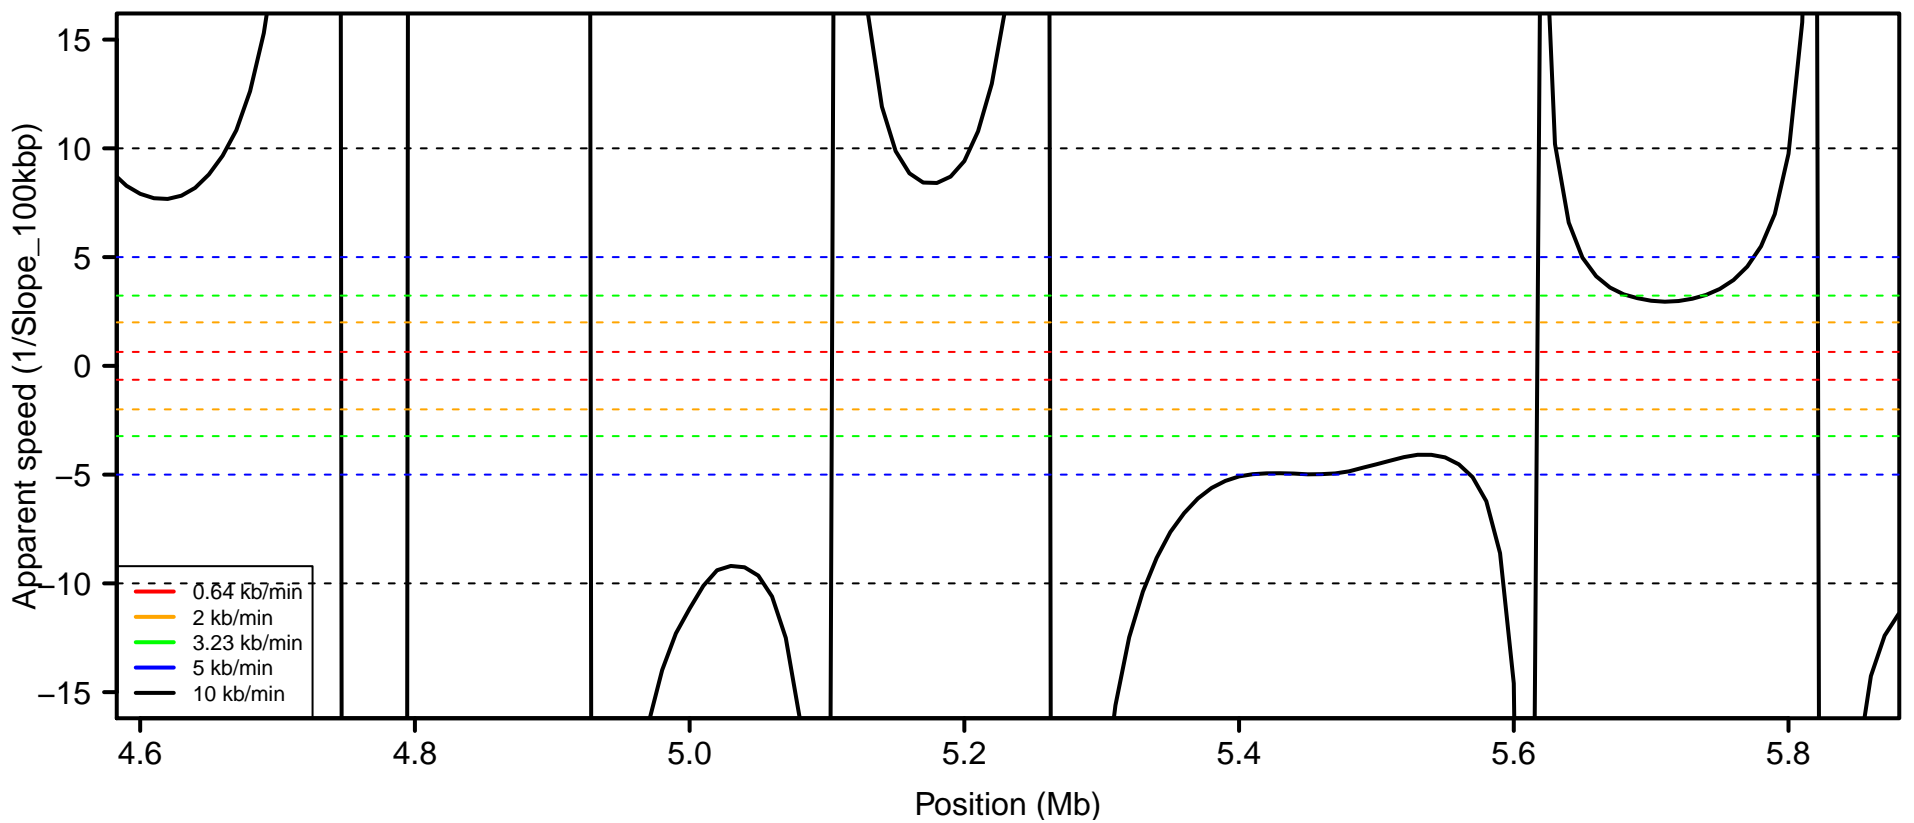

# Replication Timing Vs Encode Origin data, ENr332 (chr11:63940888\_64440888)

Annotation

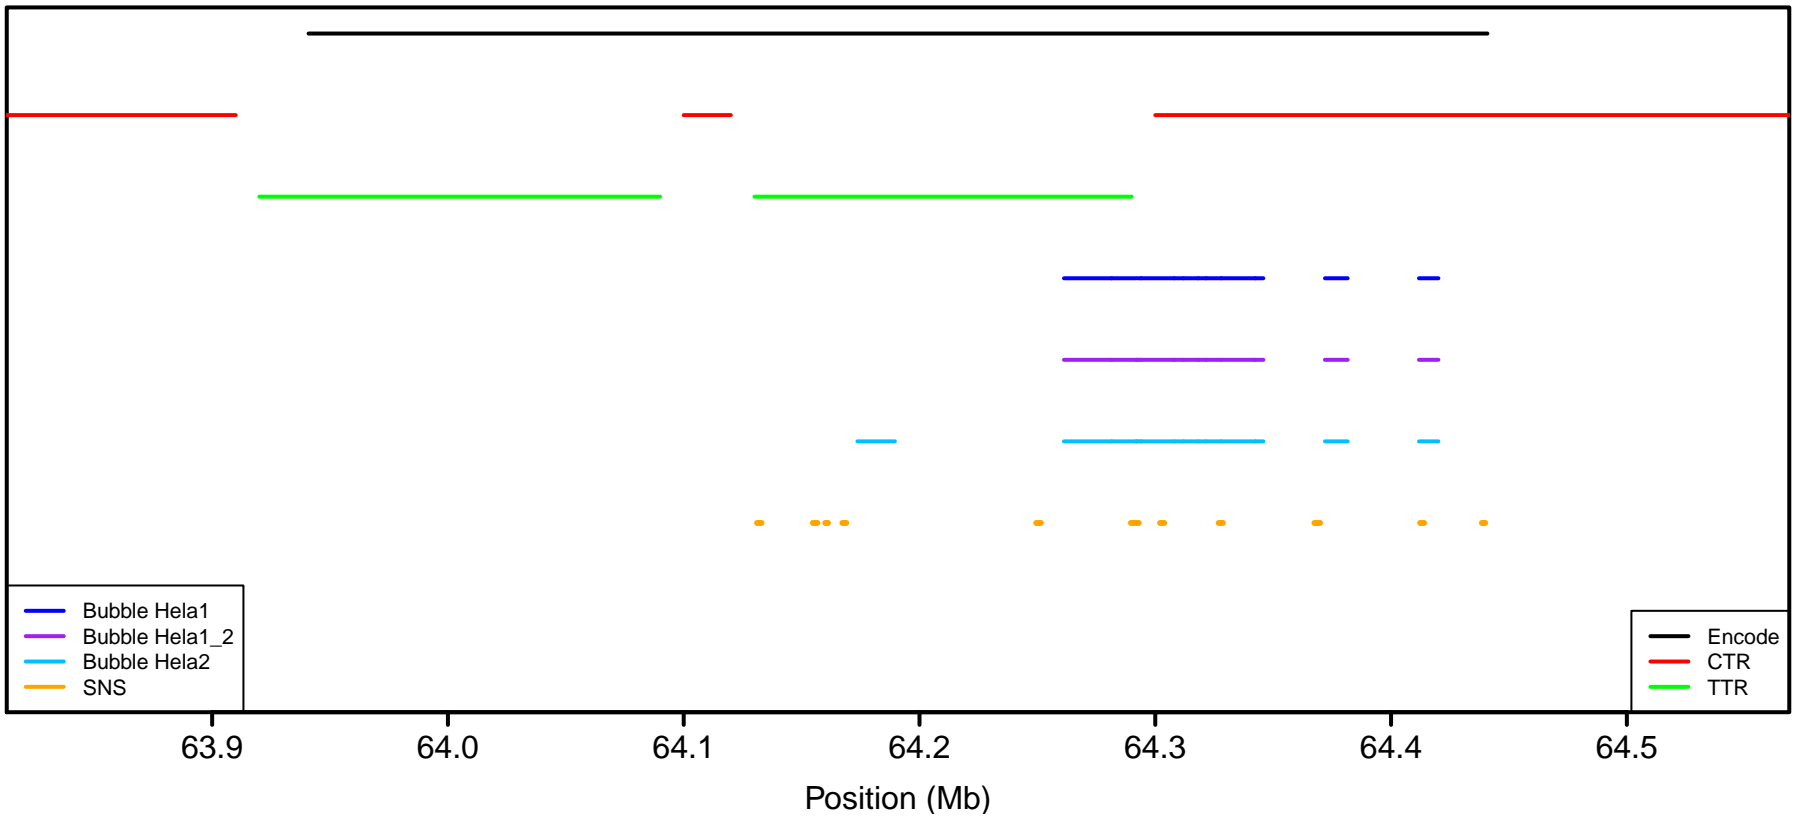

Timing of HeLa

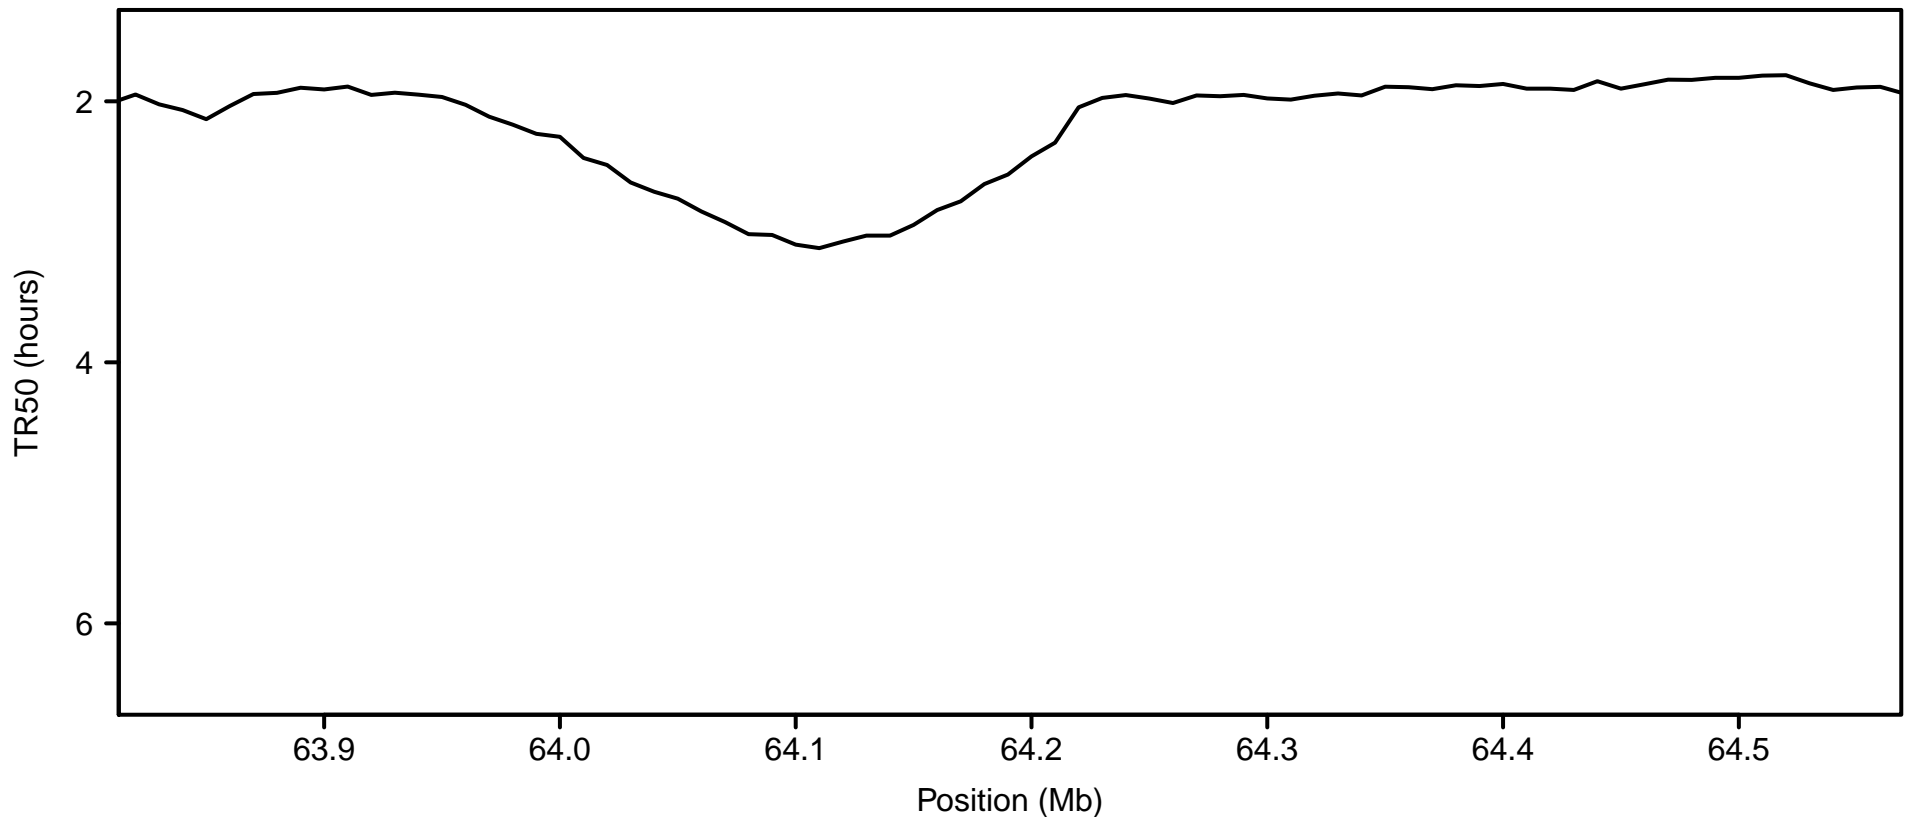

Apparent replication speed

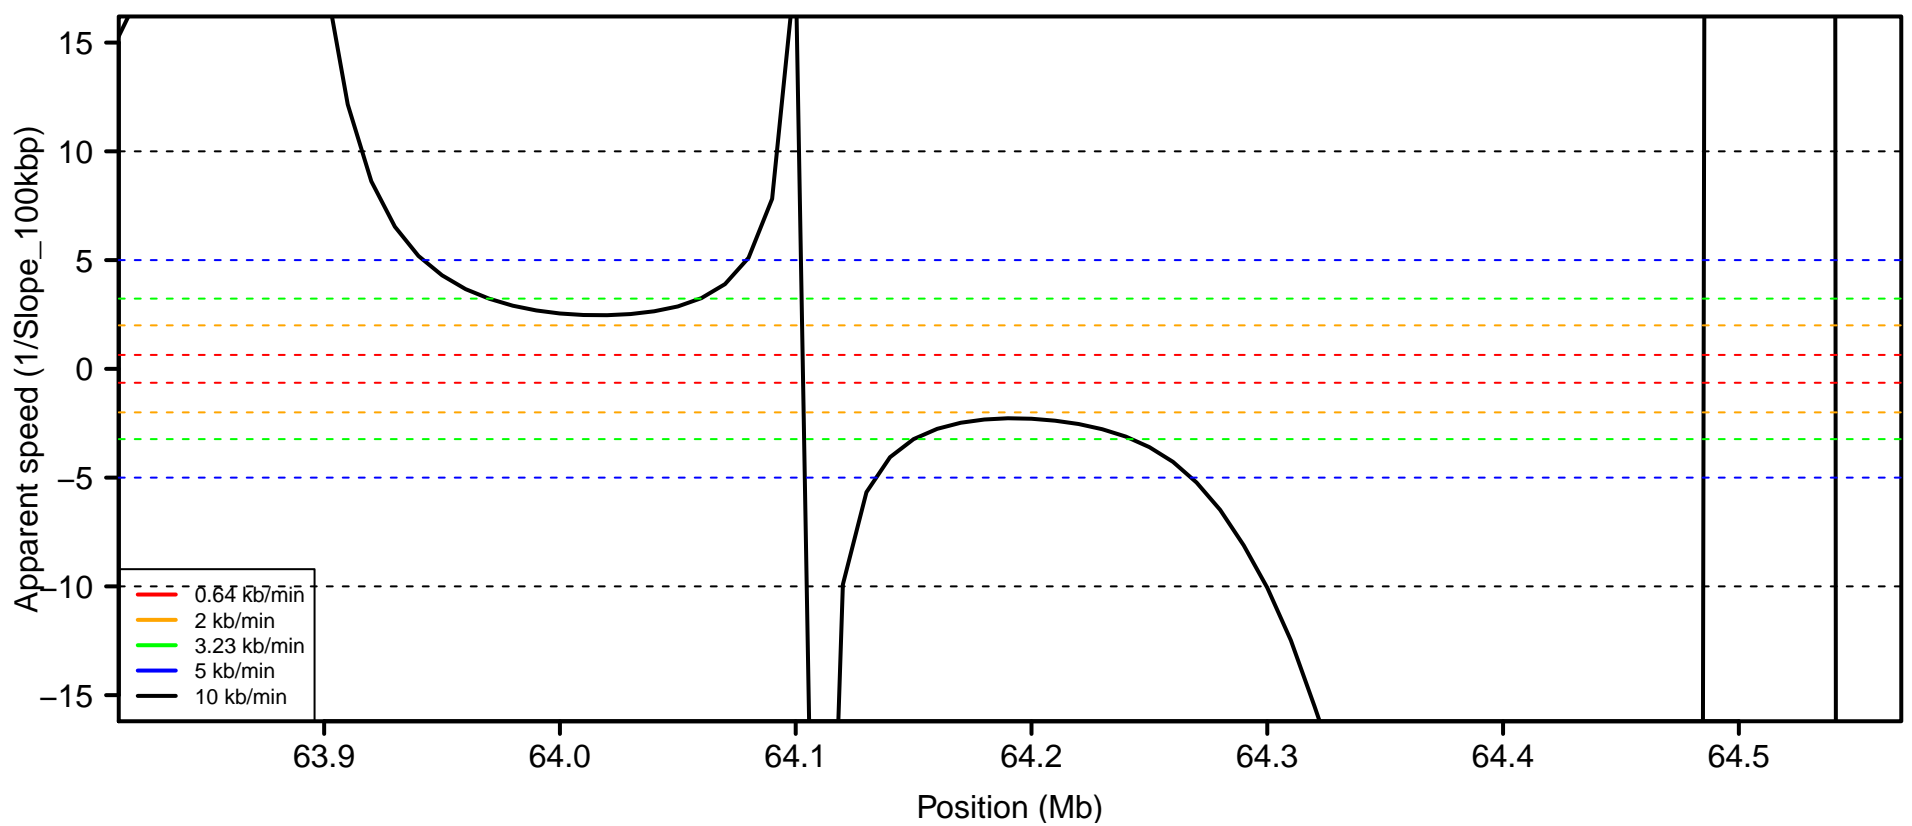



# Replication Timing Vs Encode Origin data, ENm003 (chr11:115962315\_116462315)

Annotation

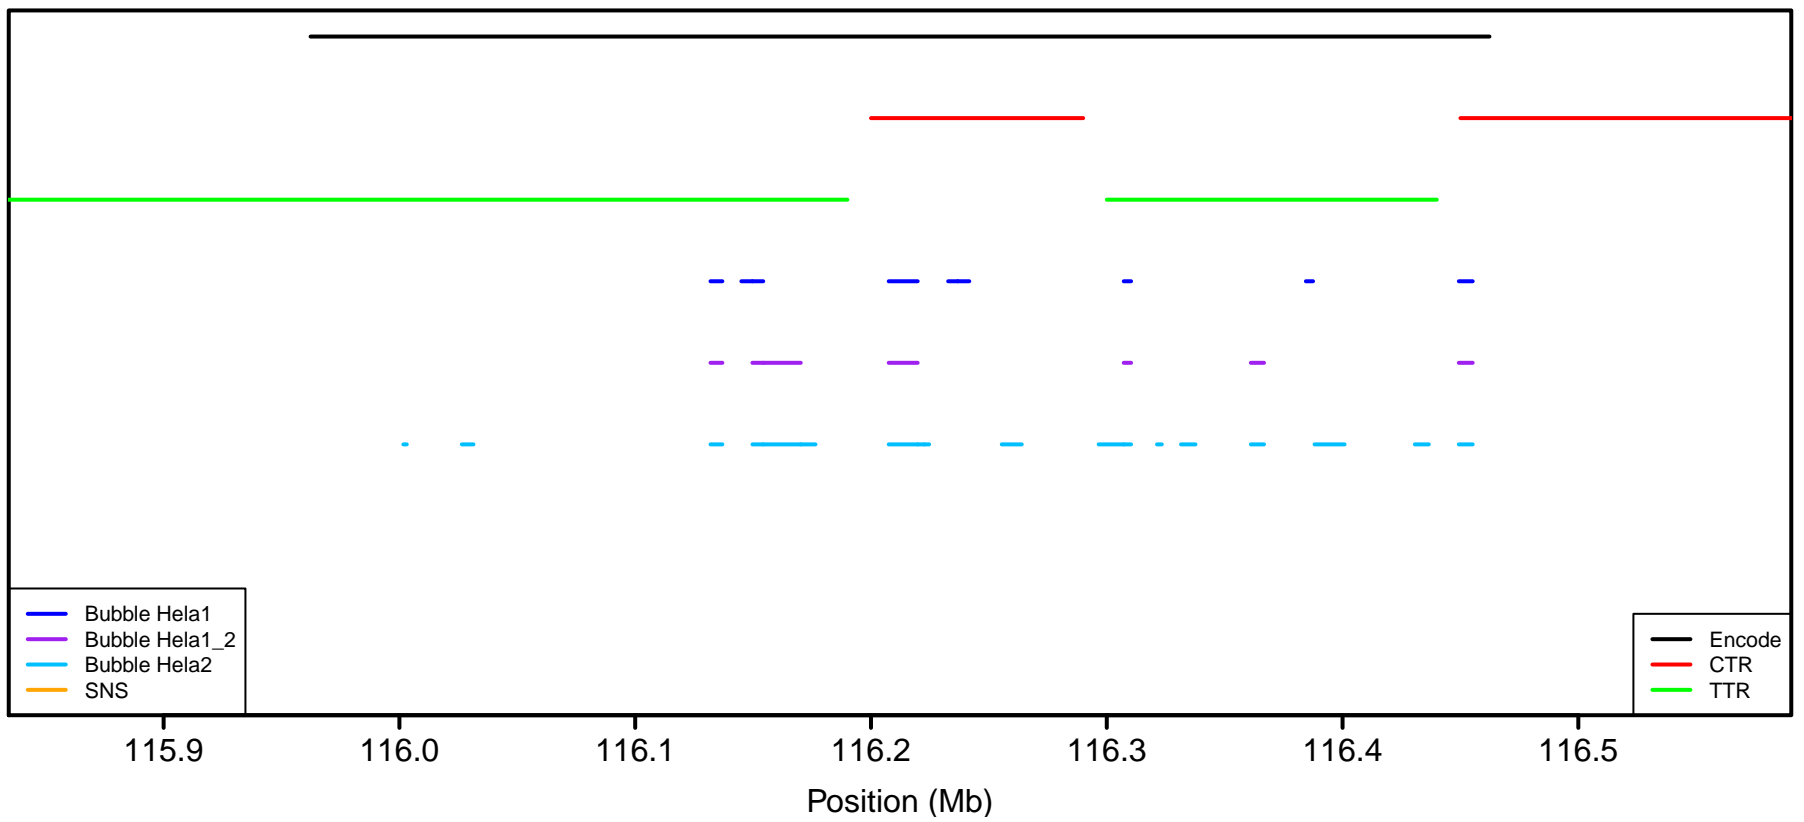

Timing of HeLa

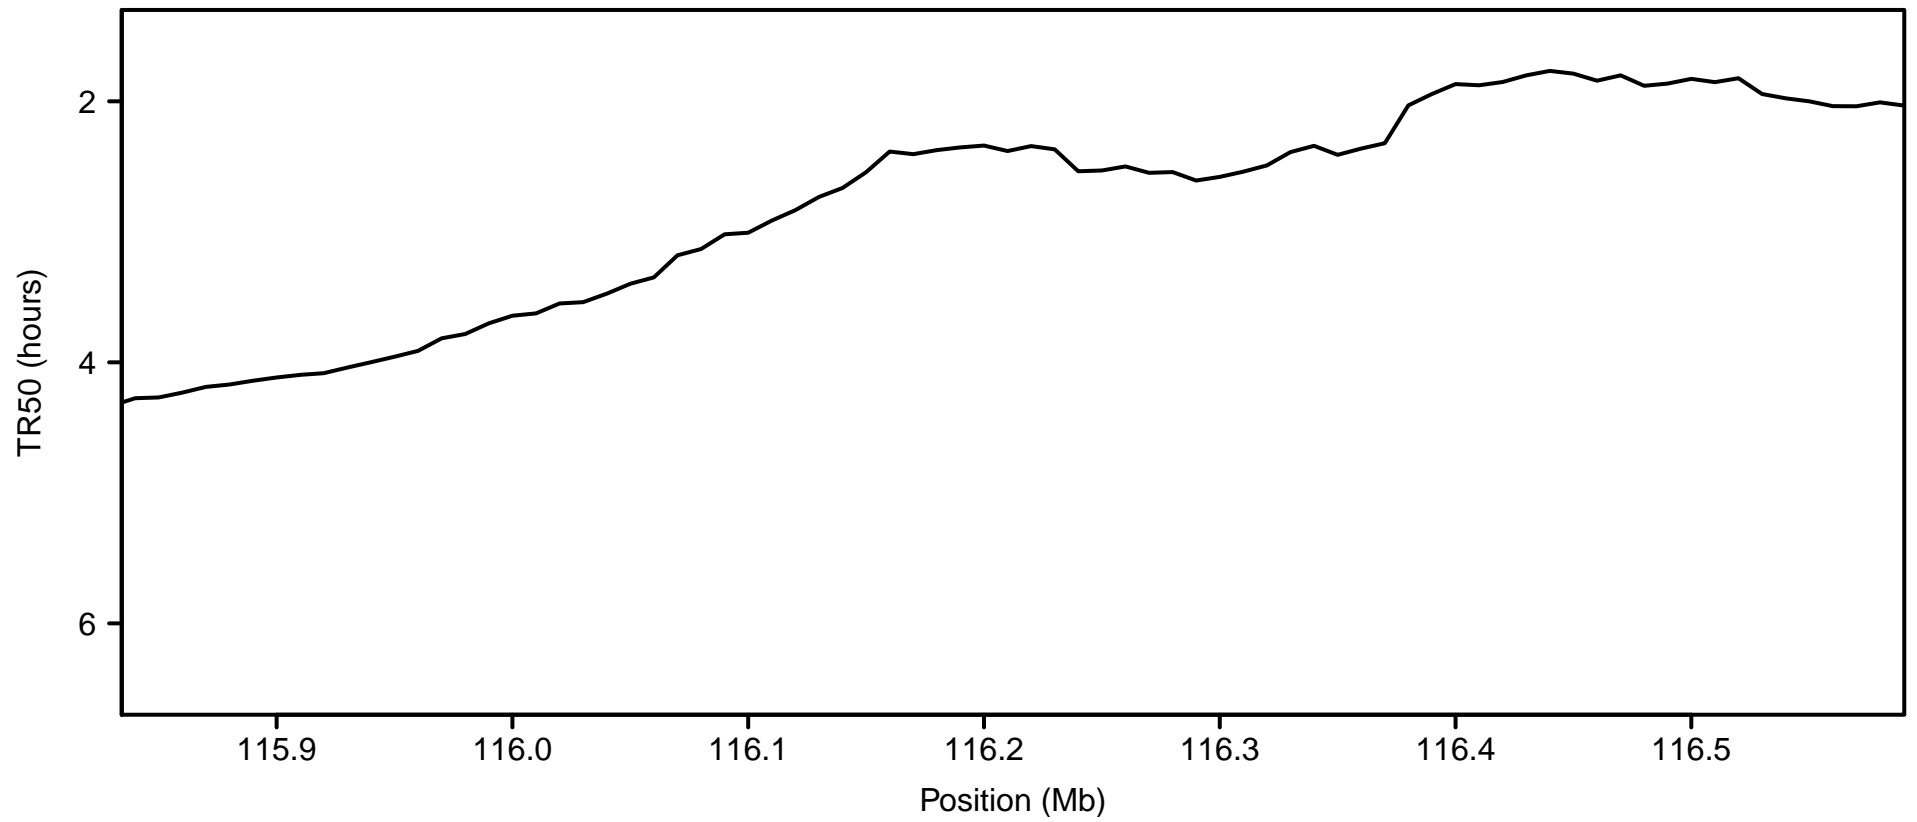

Apparent replication speed

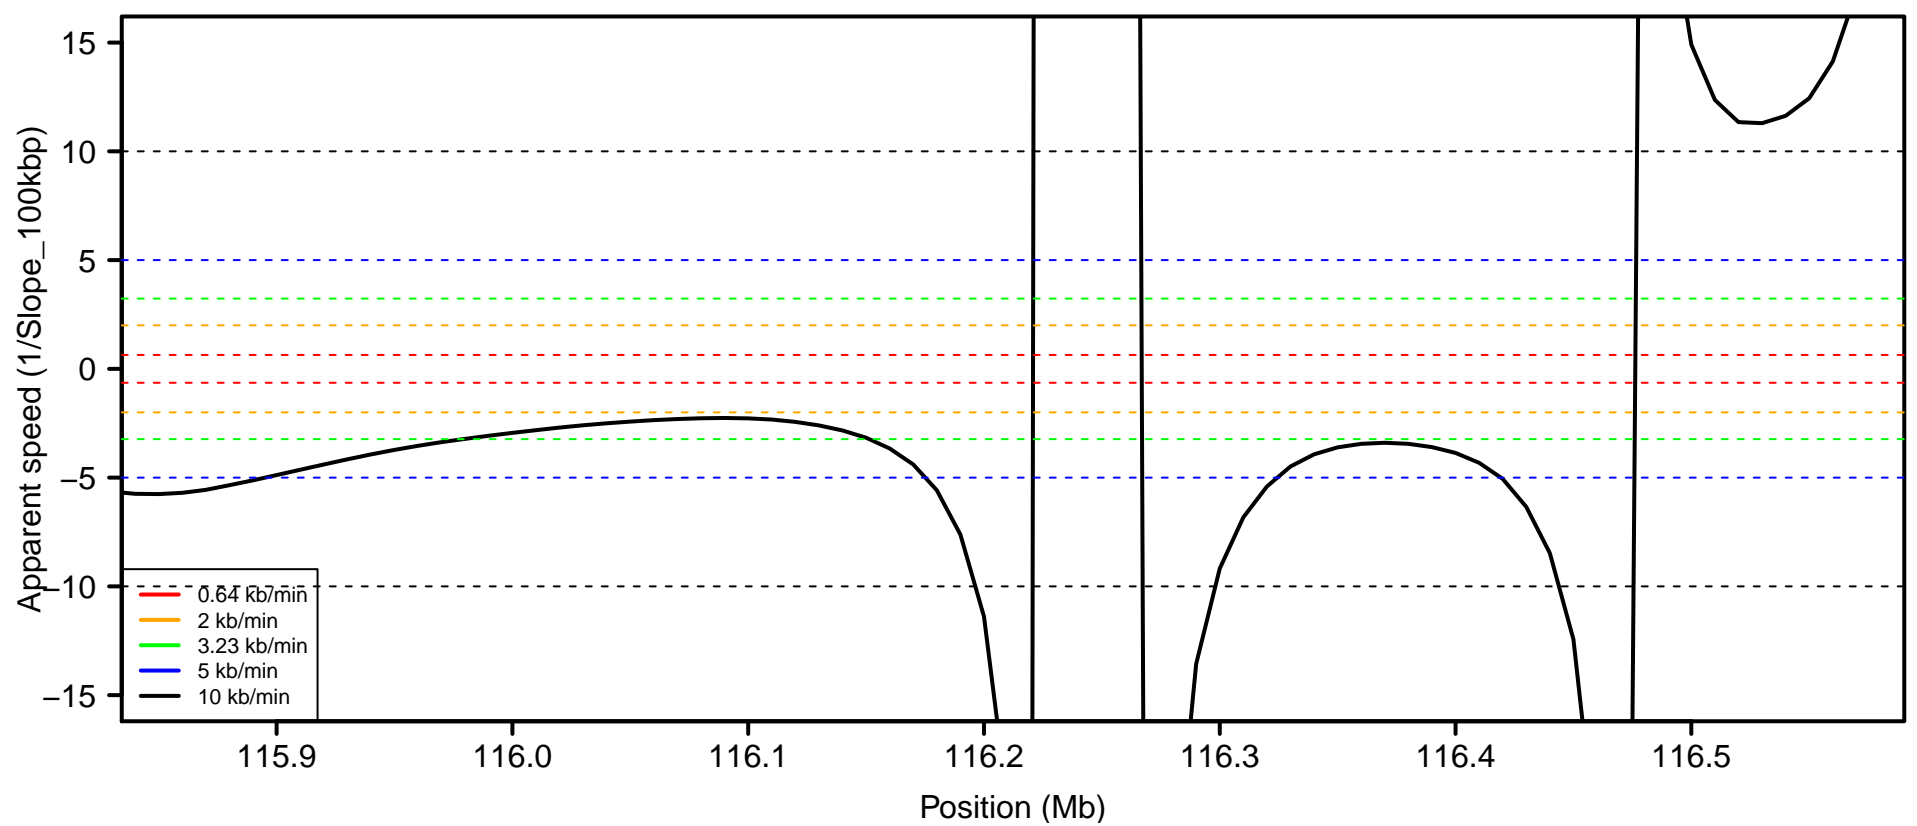

# Replication Timing Vs Encode Origin data, ENr312 (chr11:130604797\_131104797)

Annotation

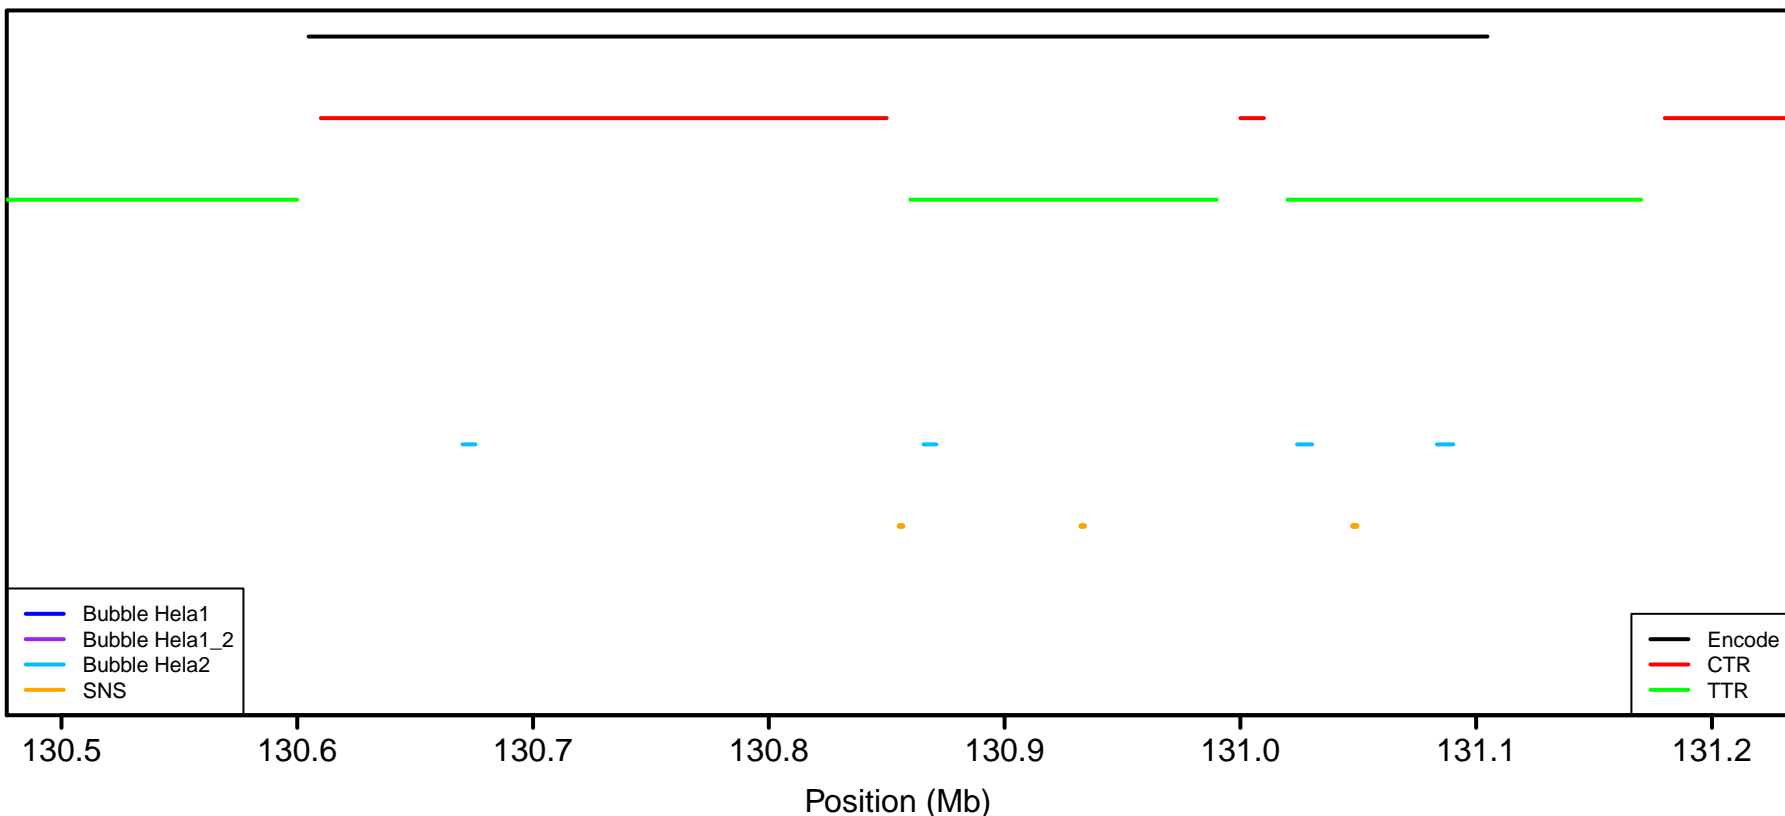

Timing of Hela

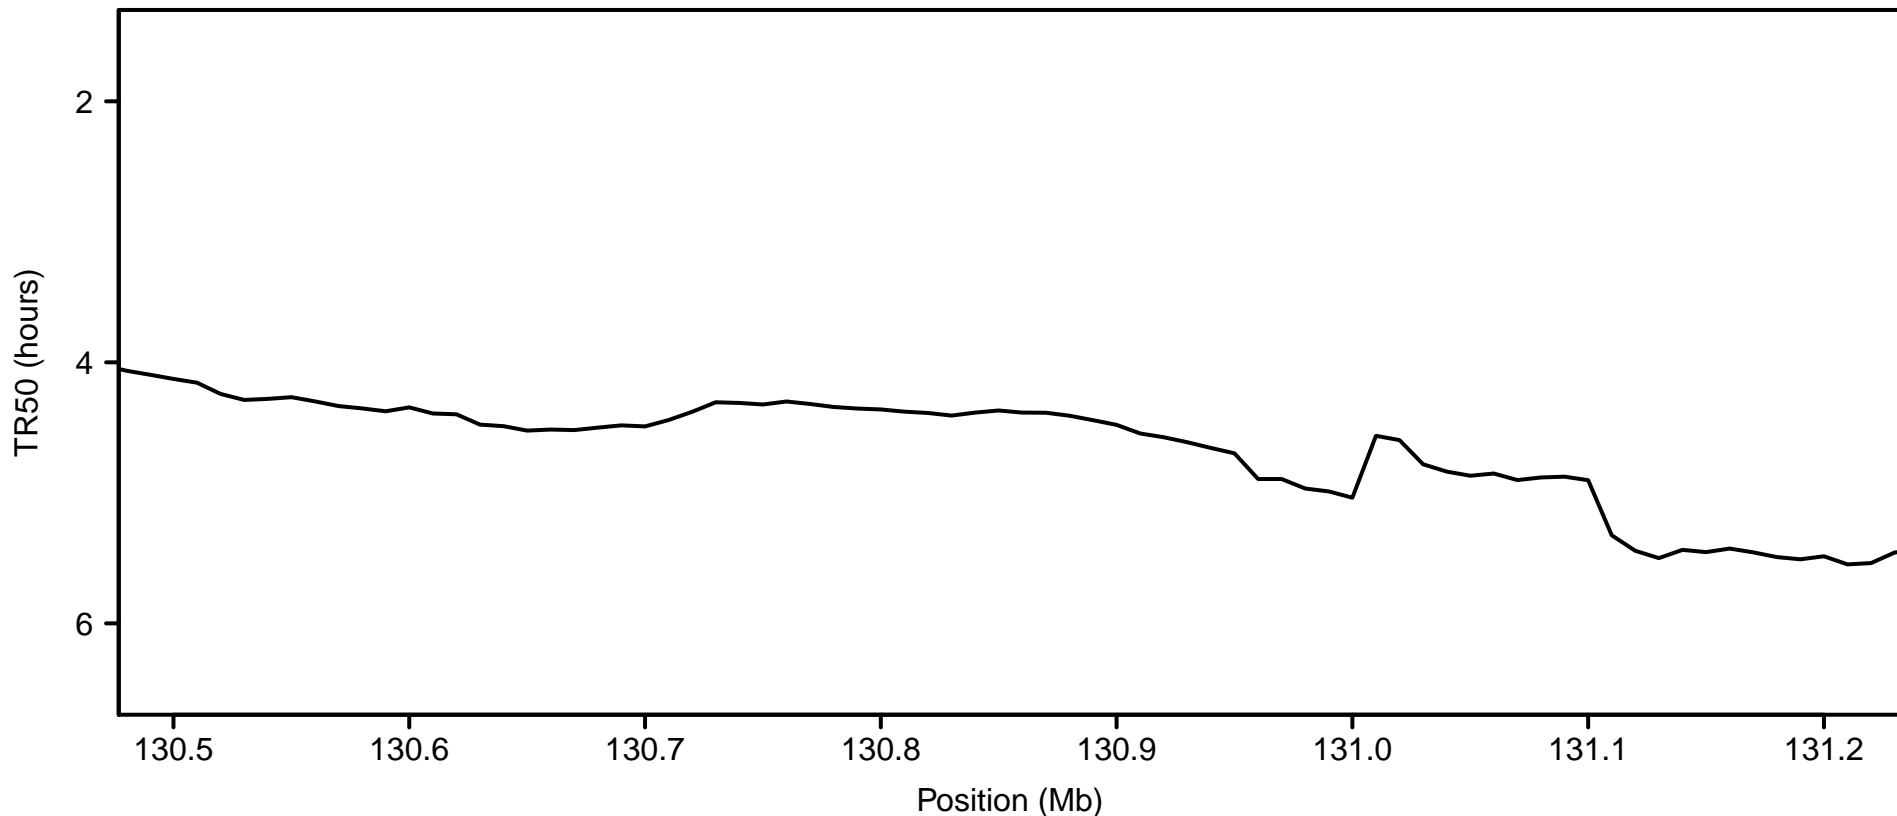

Apparent replication speed

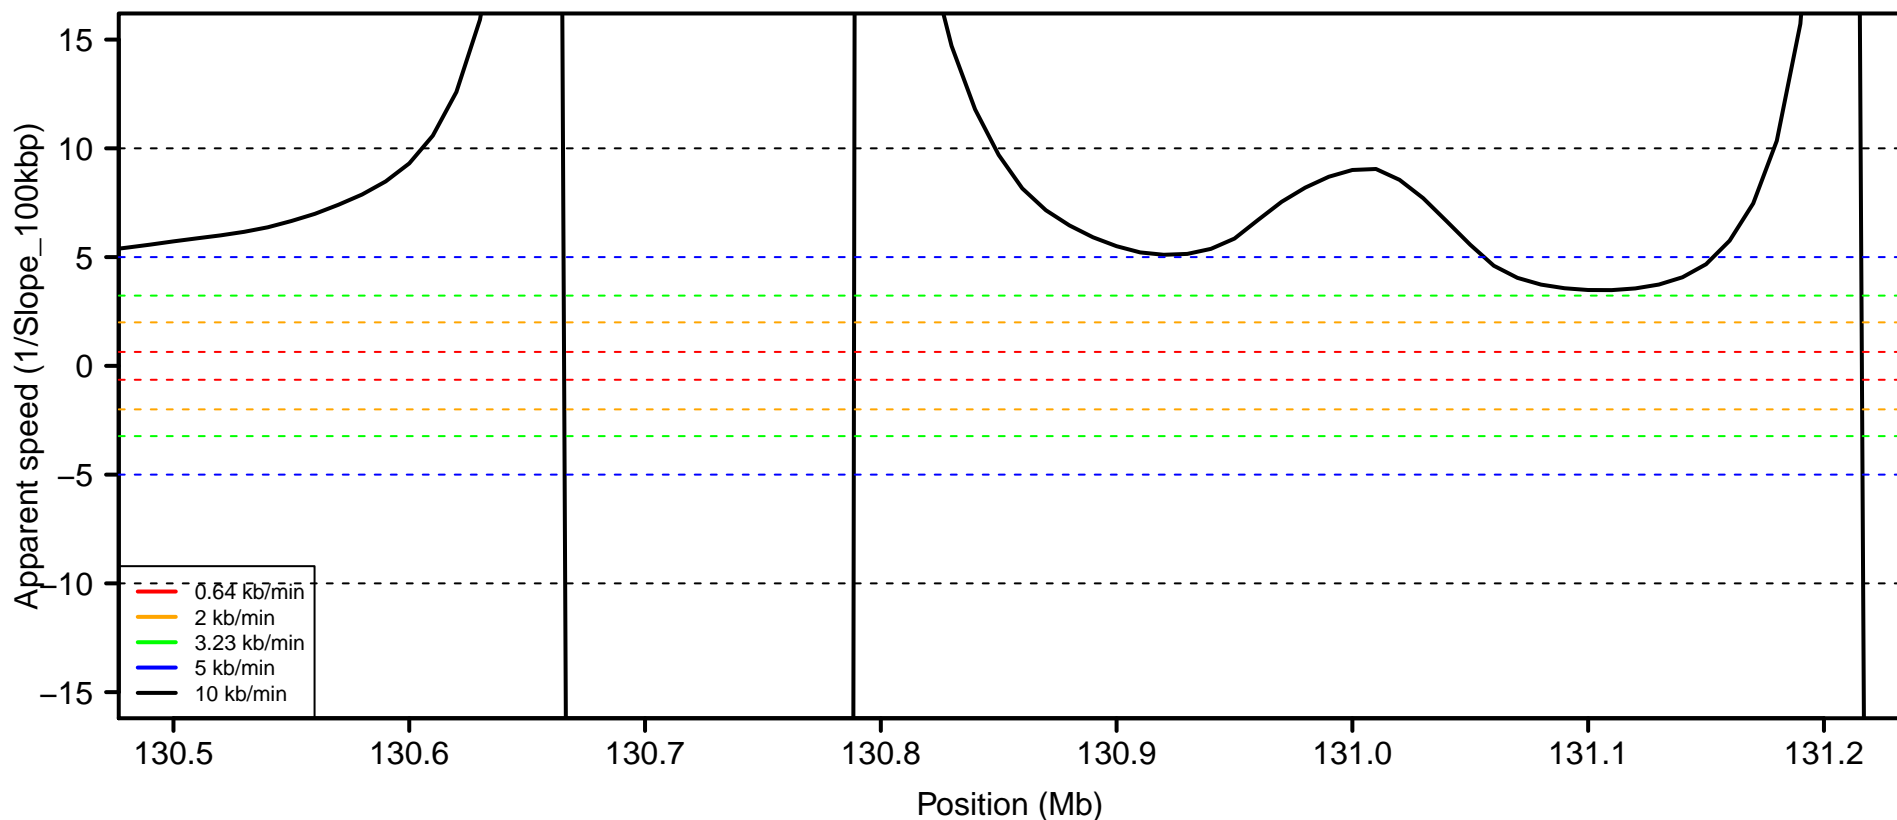

# Replication Timing Vs Encode Origin data, ENr123 (chr12:38626476\_39126476)

### Annotation

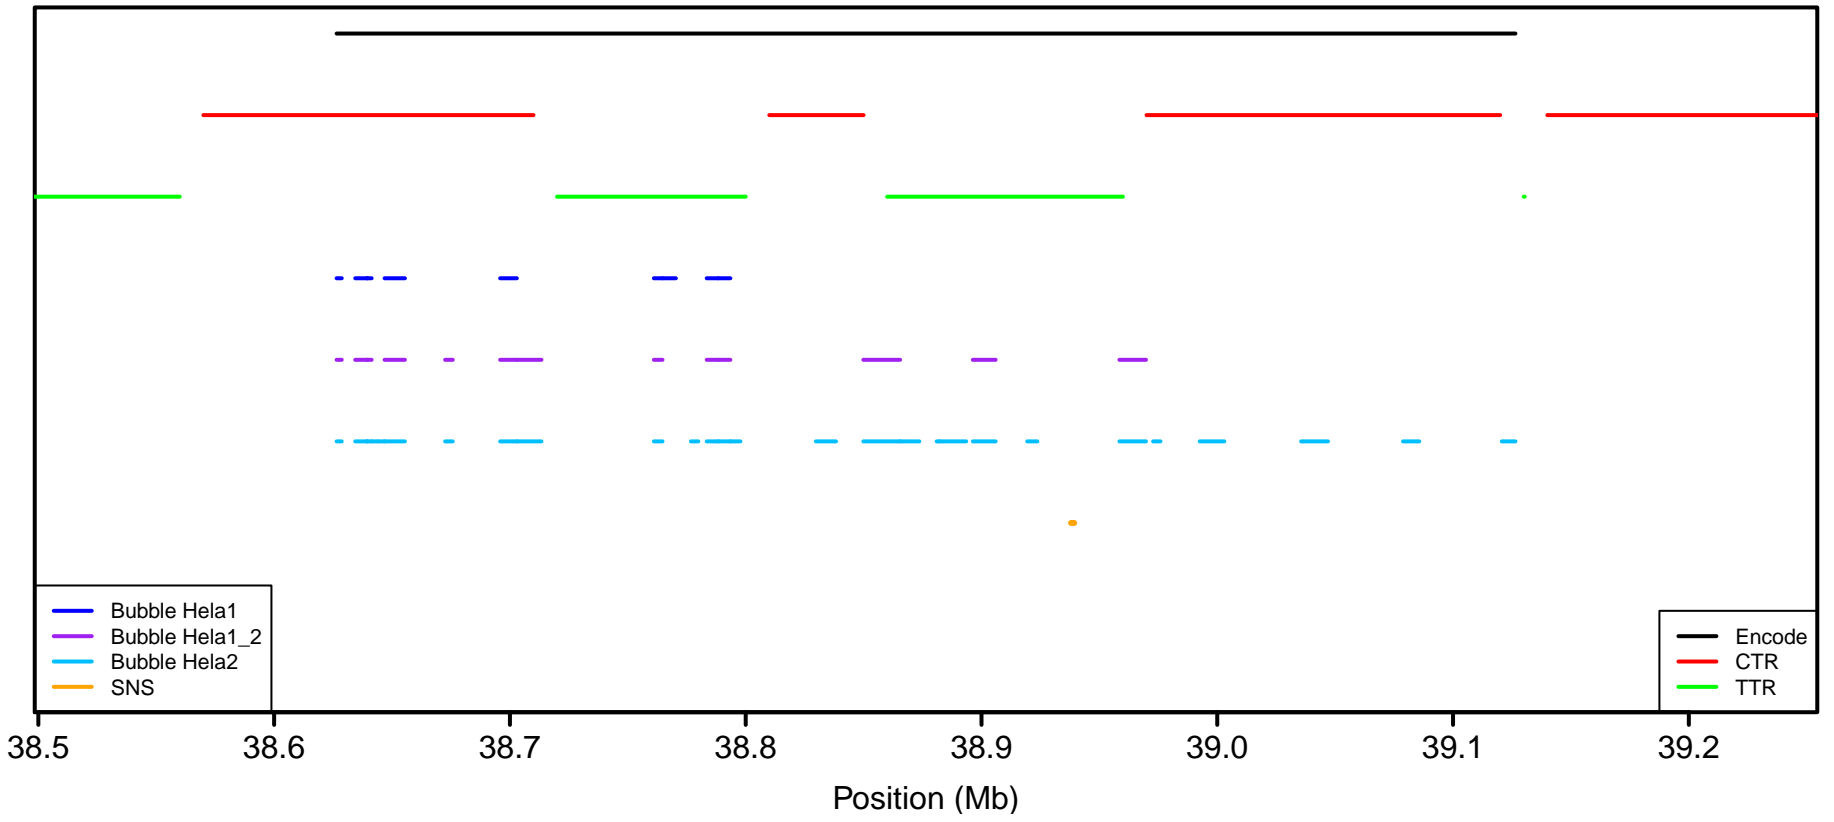

### Timing of Hela

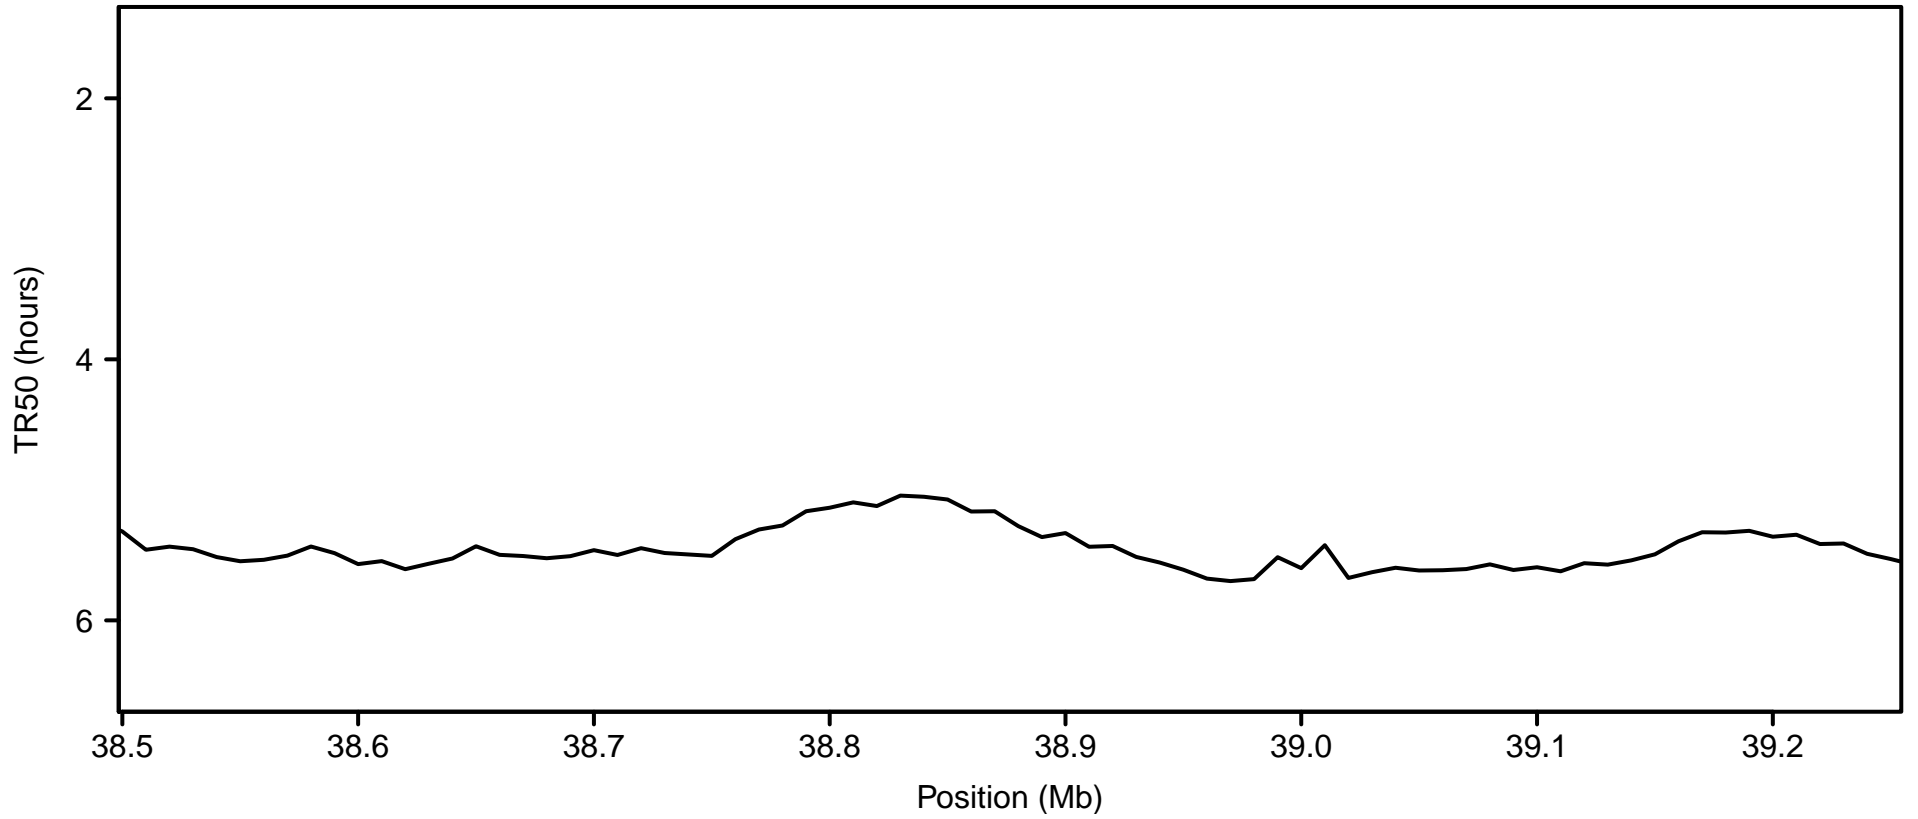

### Apparent replication speed

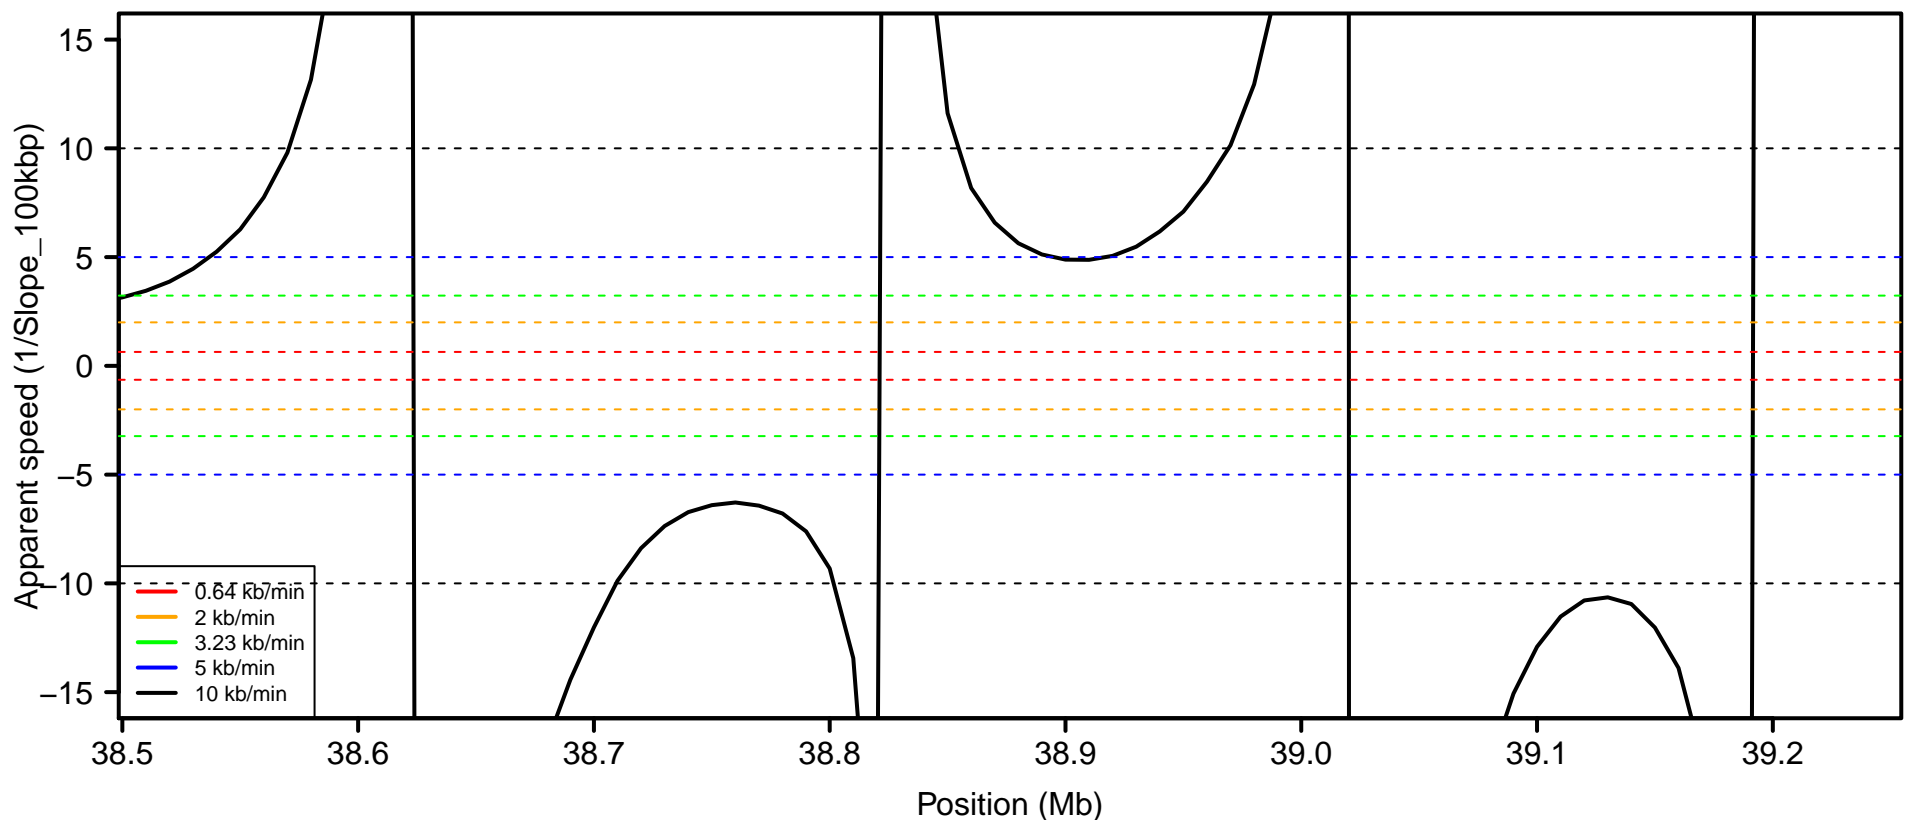

# Replication Timing Vs Encode Origin data, ENr111 (chr13:29418015\_29918015)

Annotation

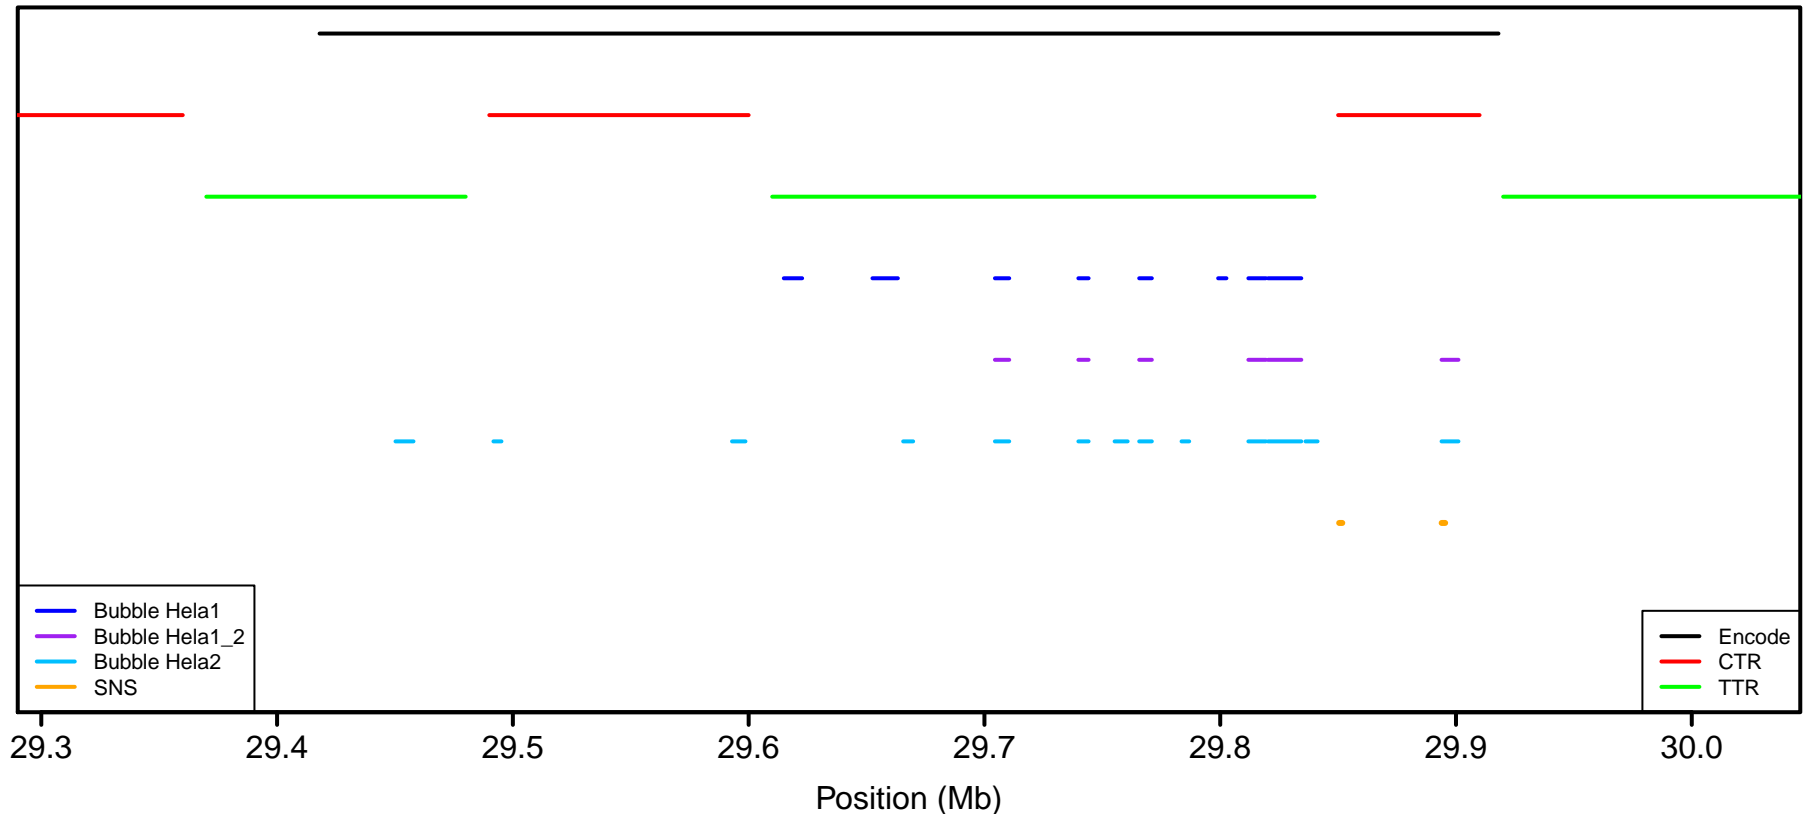

Timing of HeLa

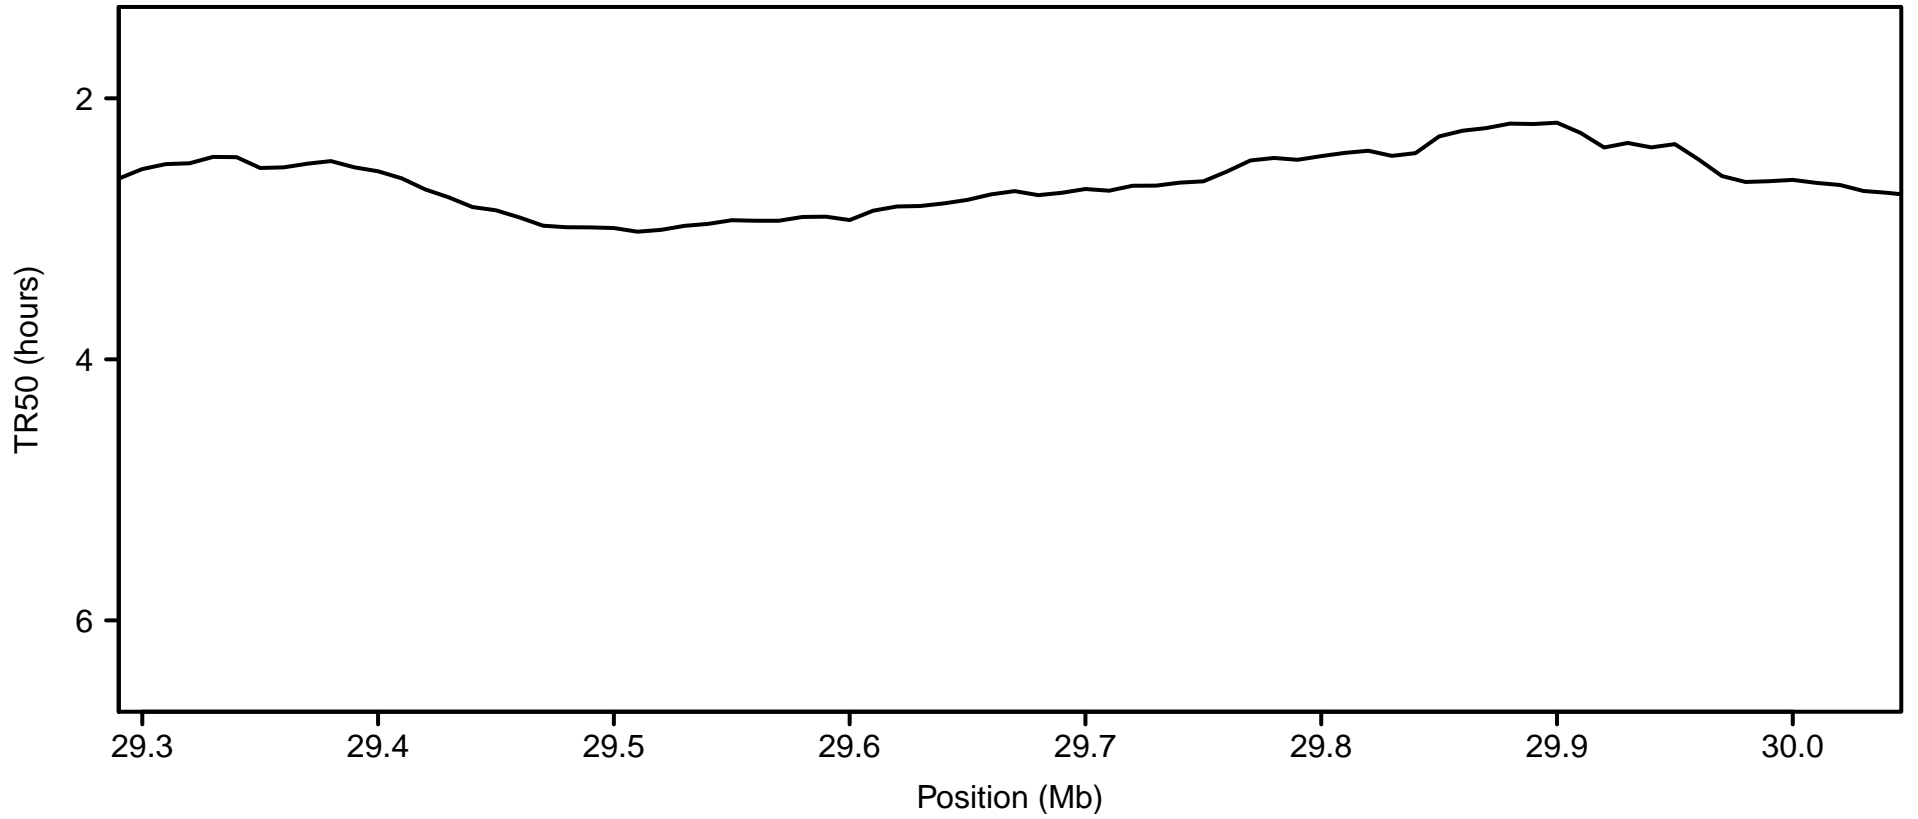

Apparent replication speed

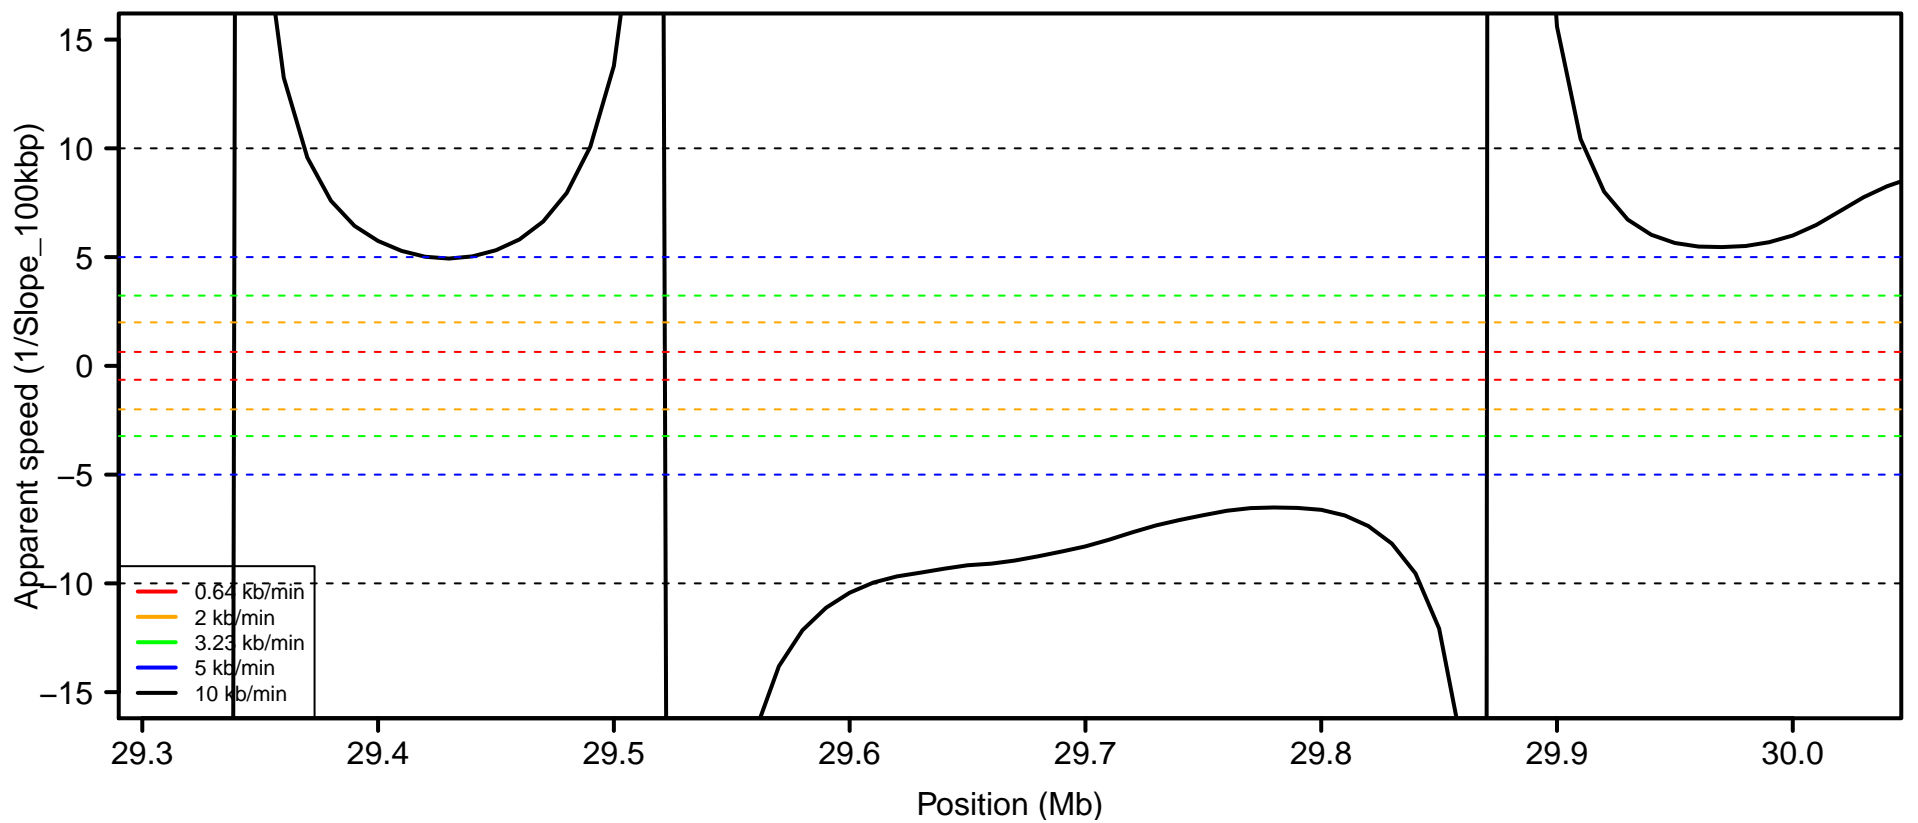

# Replication Timing Vs Encode Origin data, ENr132 (chr13:112338064\_112838064)

Annotation

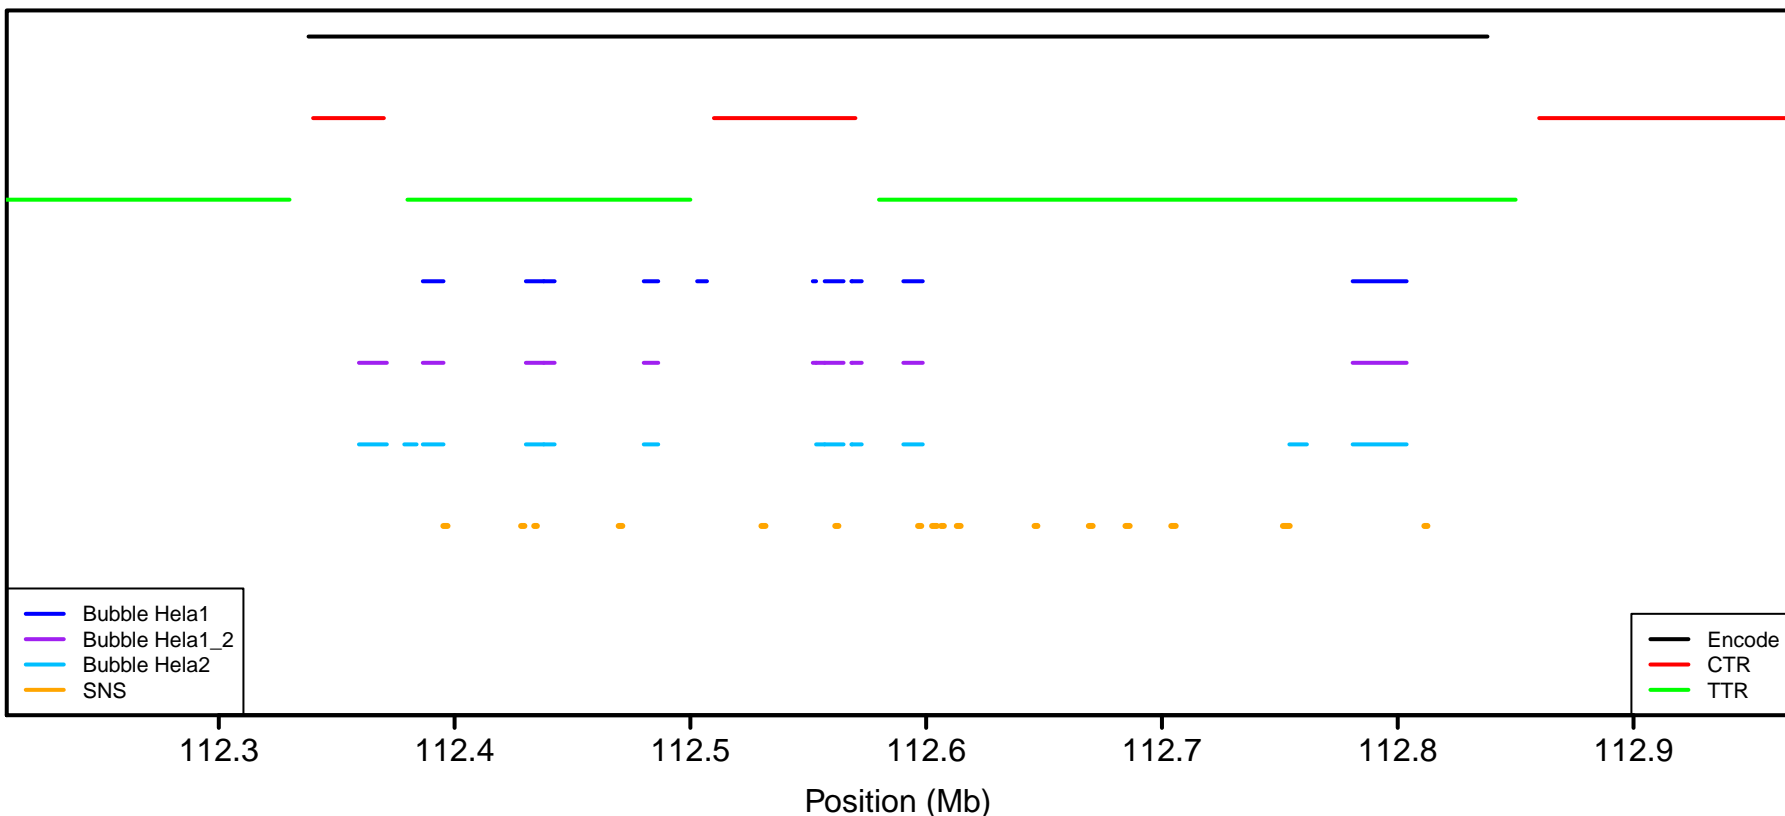

Timing of HeLa

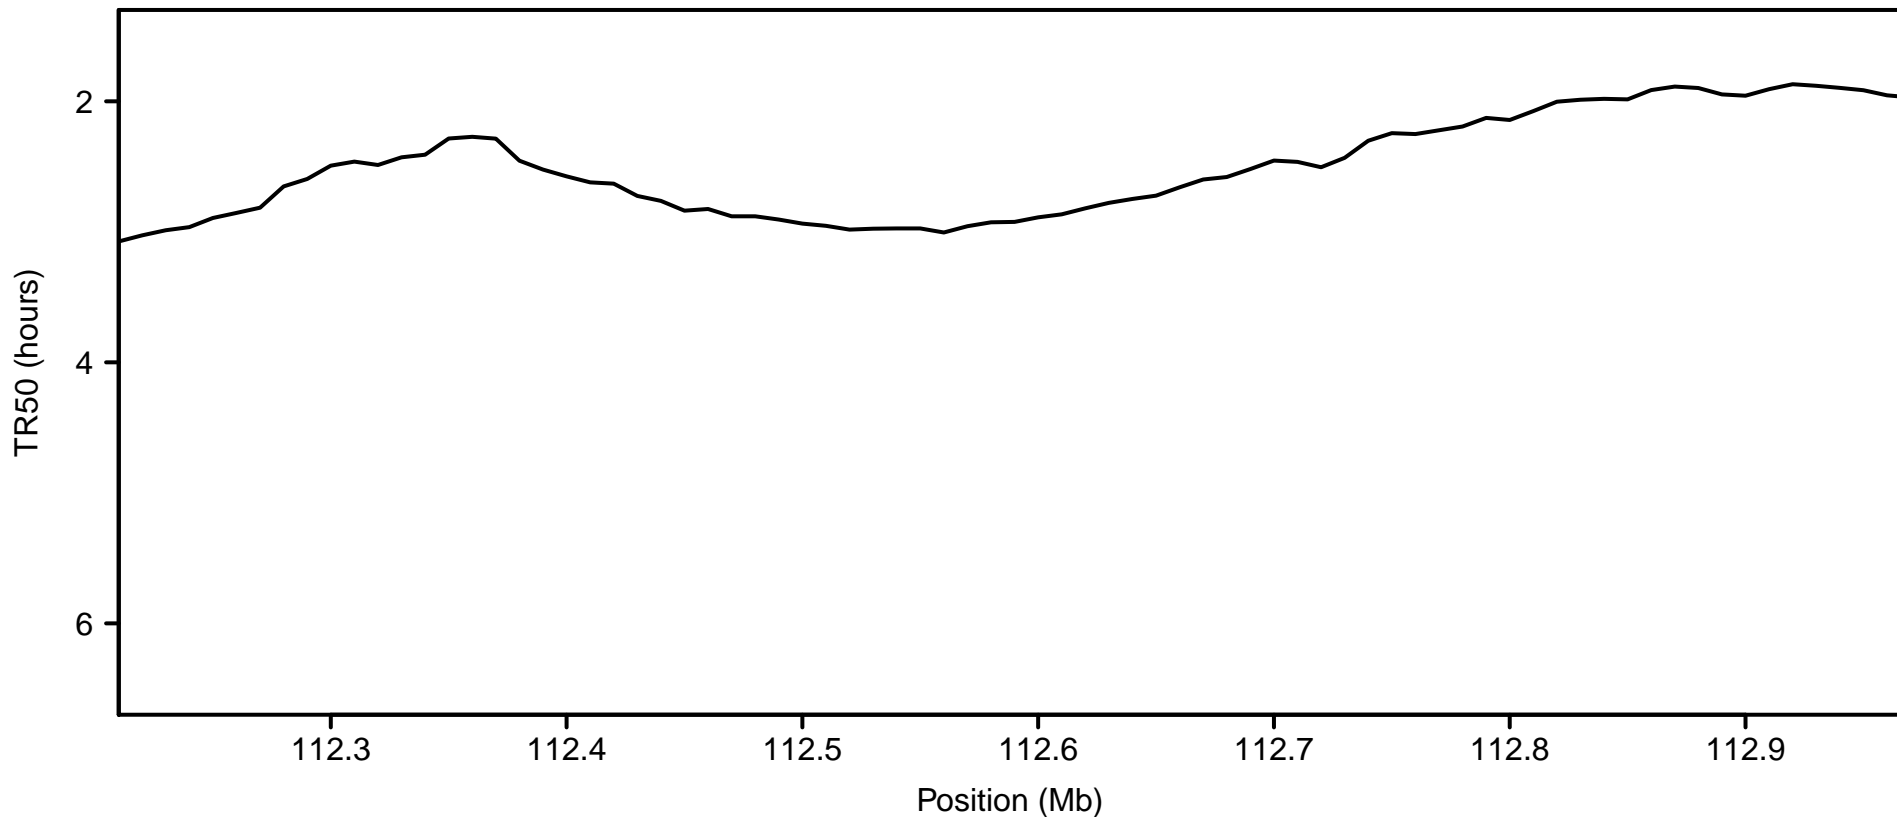

Apparent replication speed

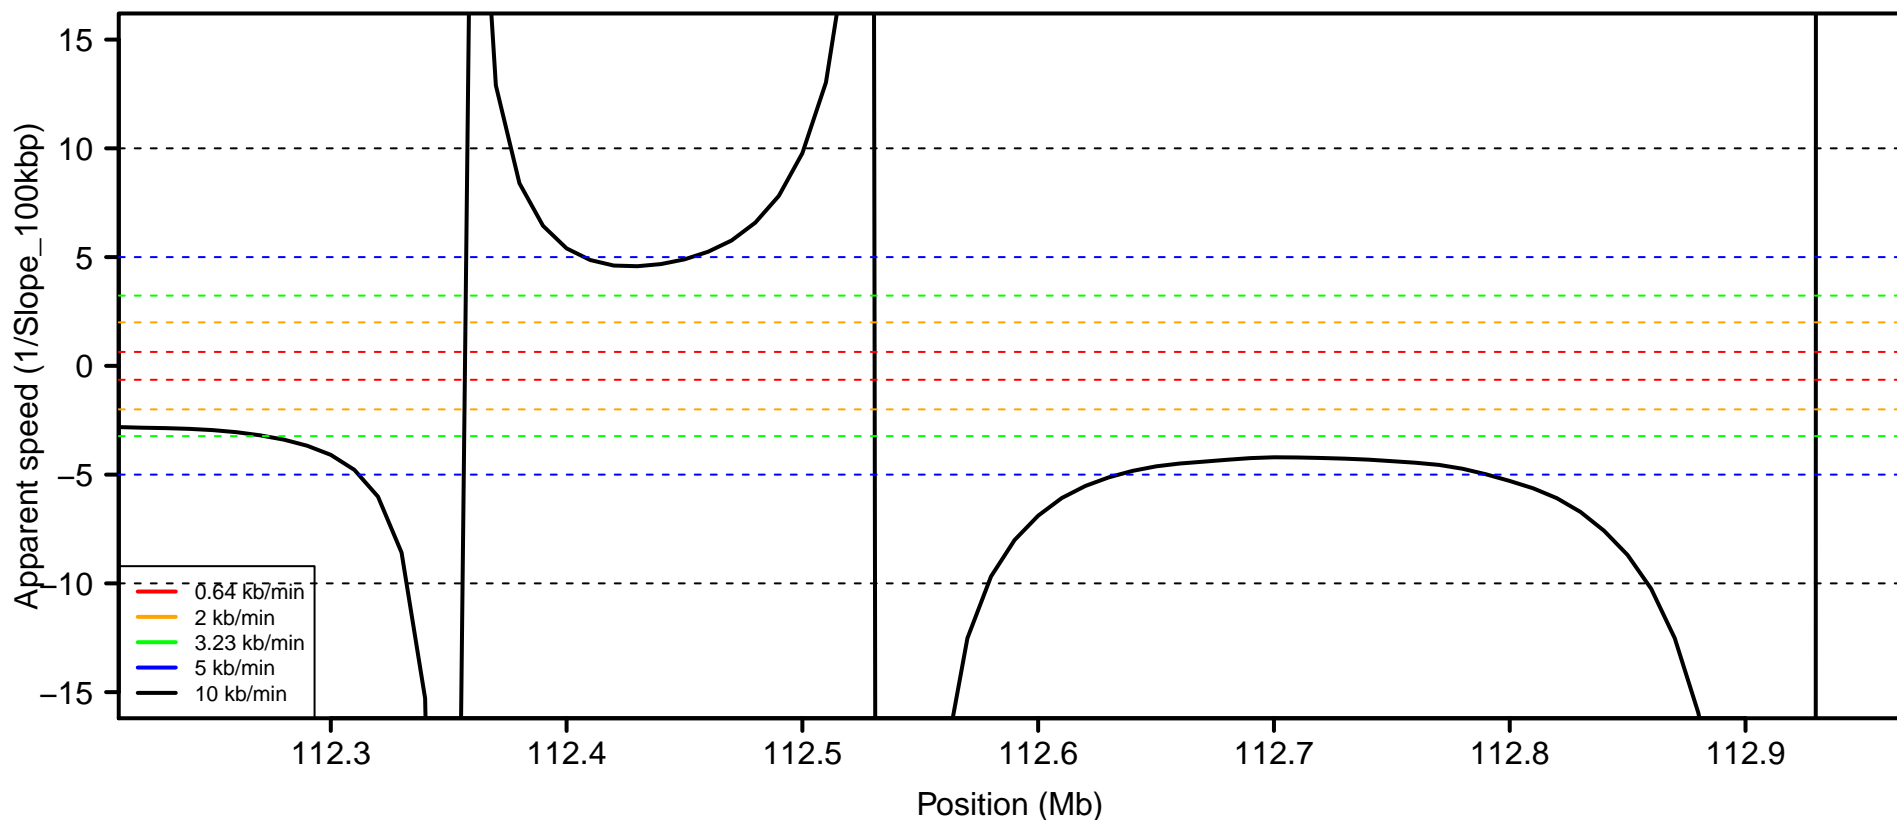

# Replication Timing Vs Encode Origin data, ENr311 (chr14:52947075\_53447075)

Annotation

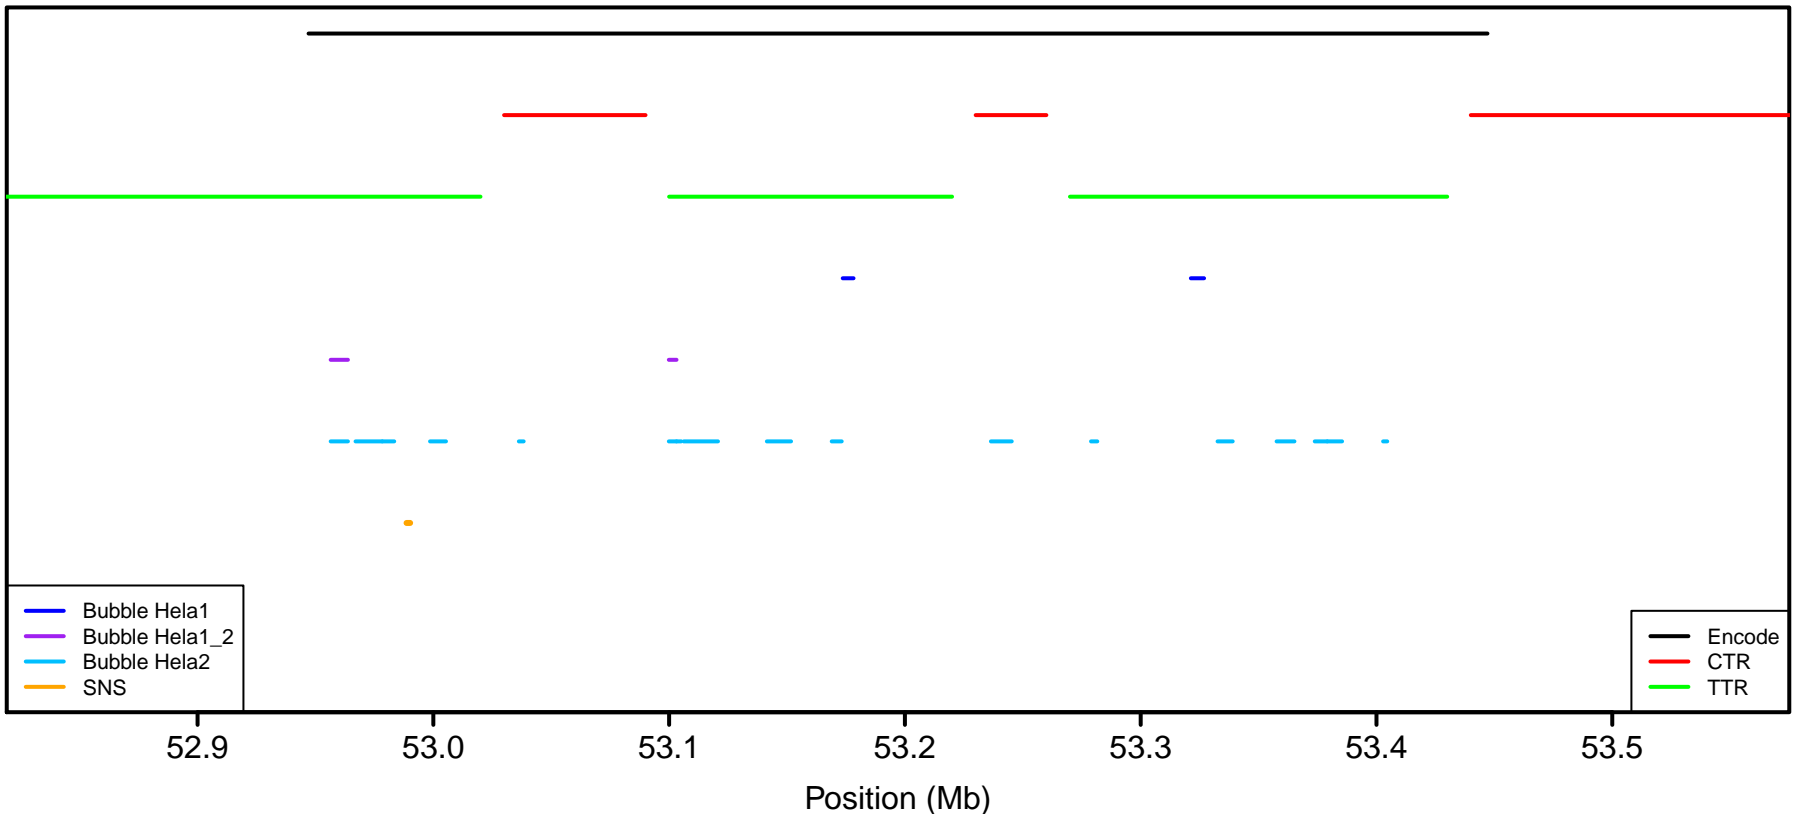

Timing of Hela

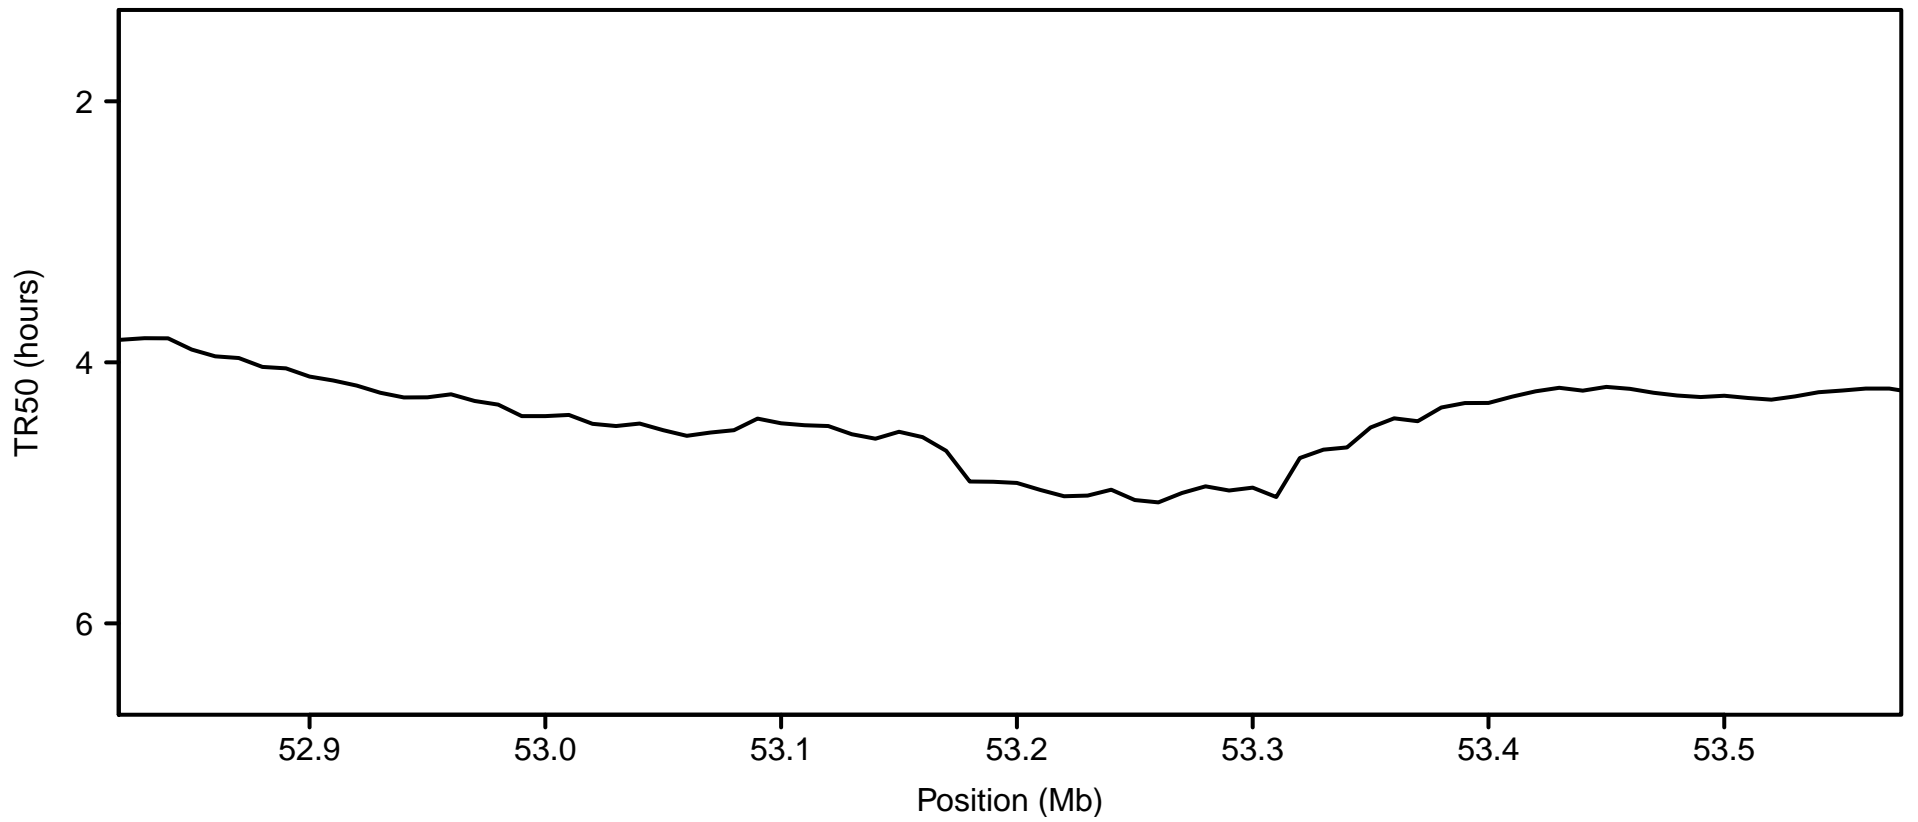

Apparent replication speed

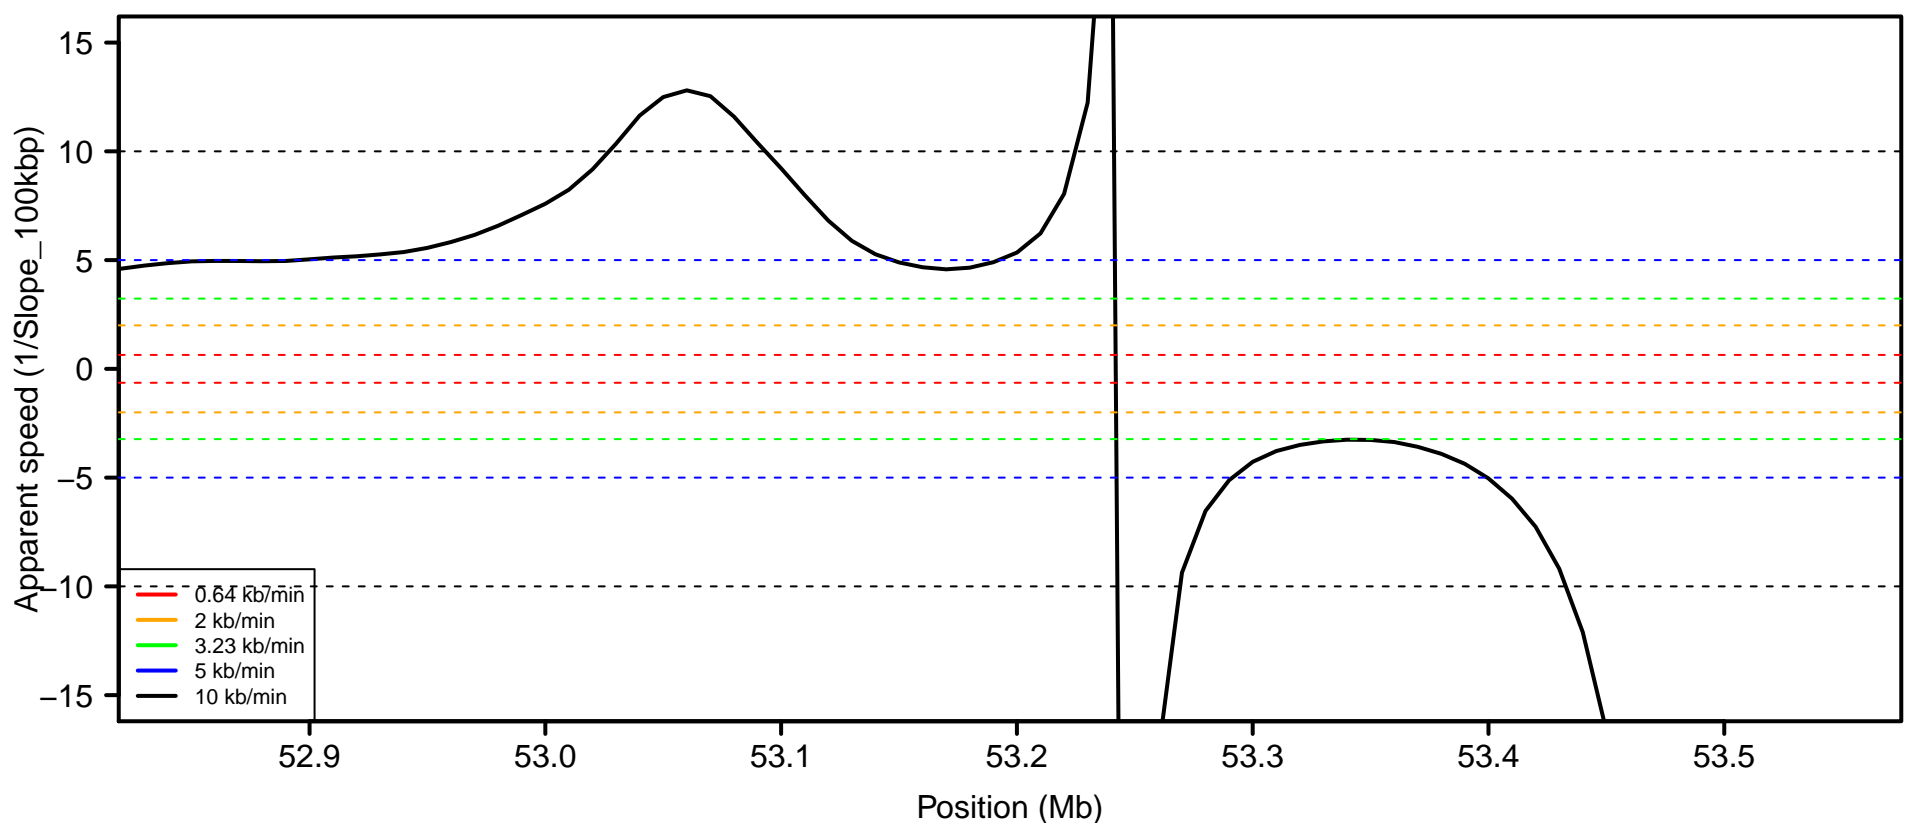

# Replication Timing Vs Encode Origin data, ENr322 (chr14:98458223\_98958223)

Annotation

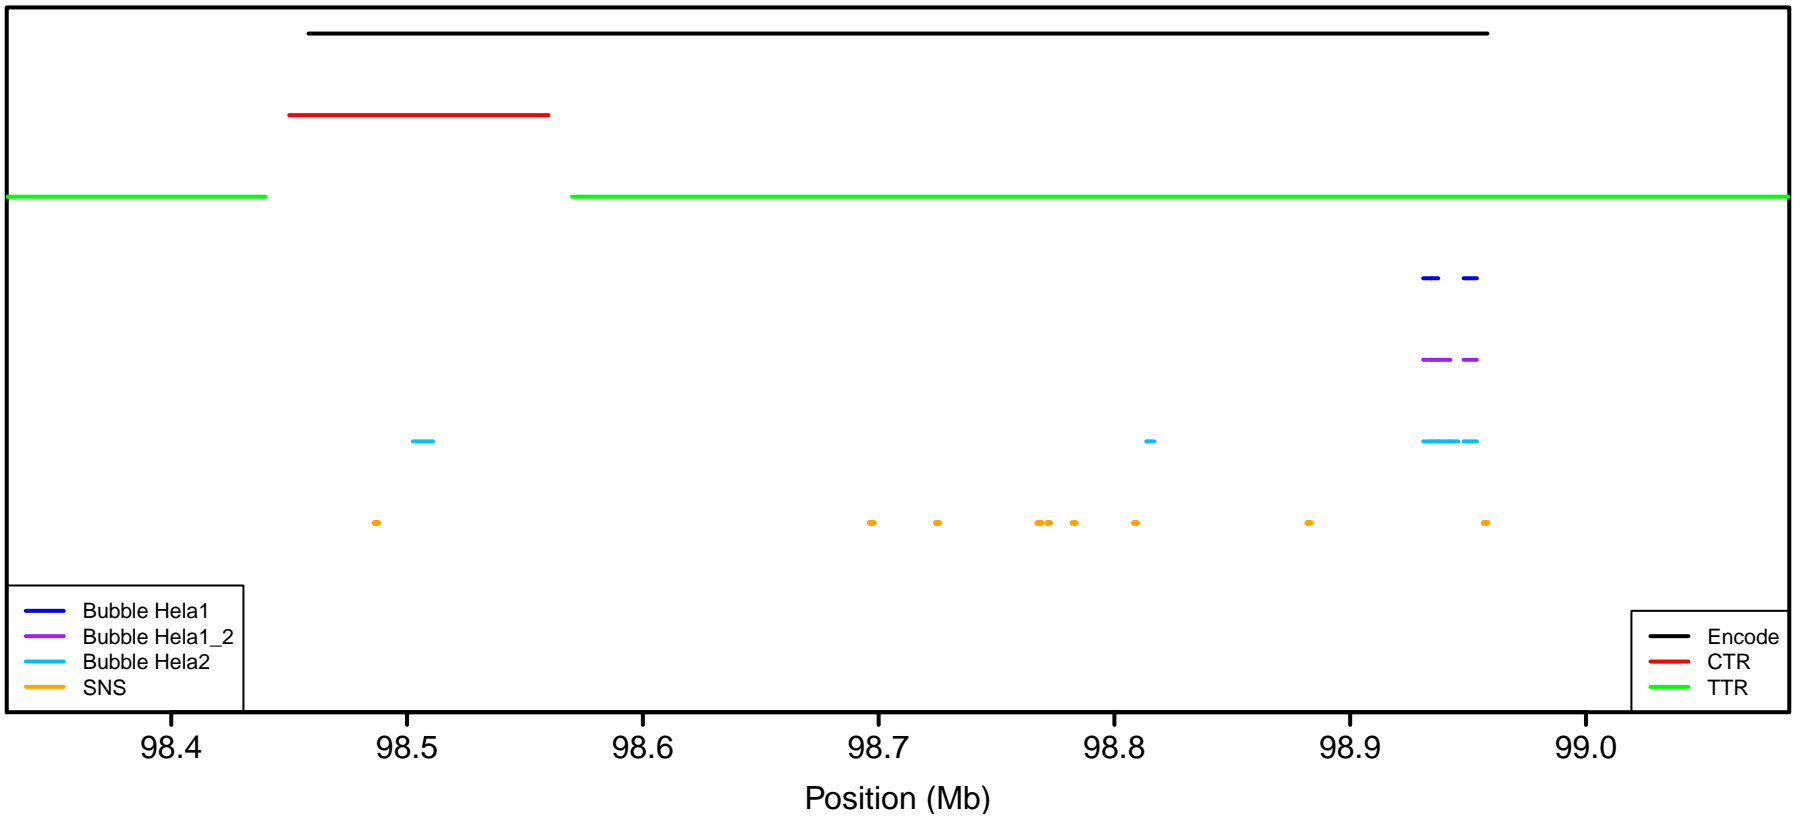

Timing of Hela

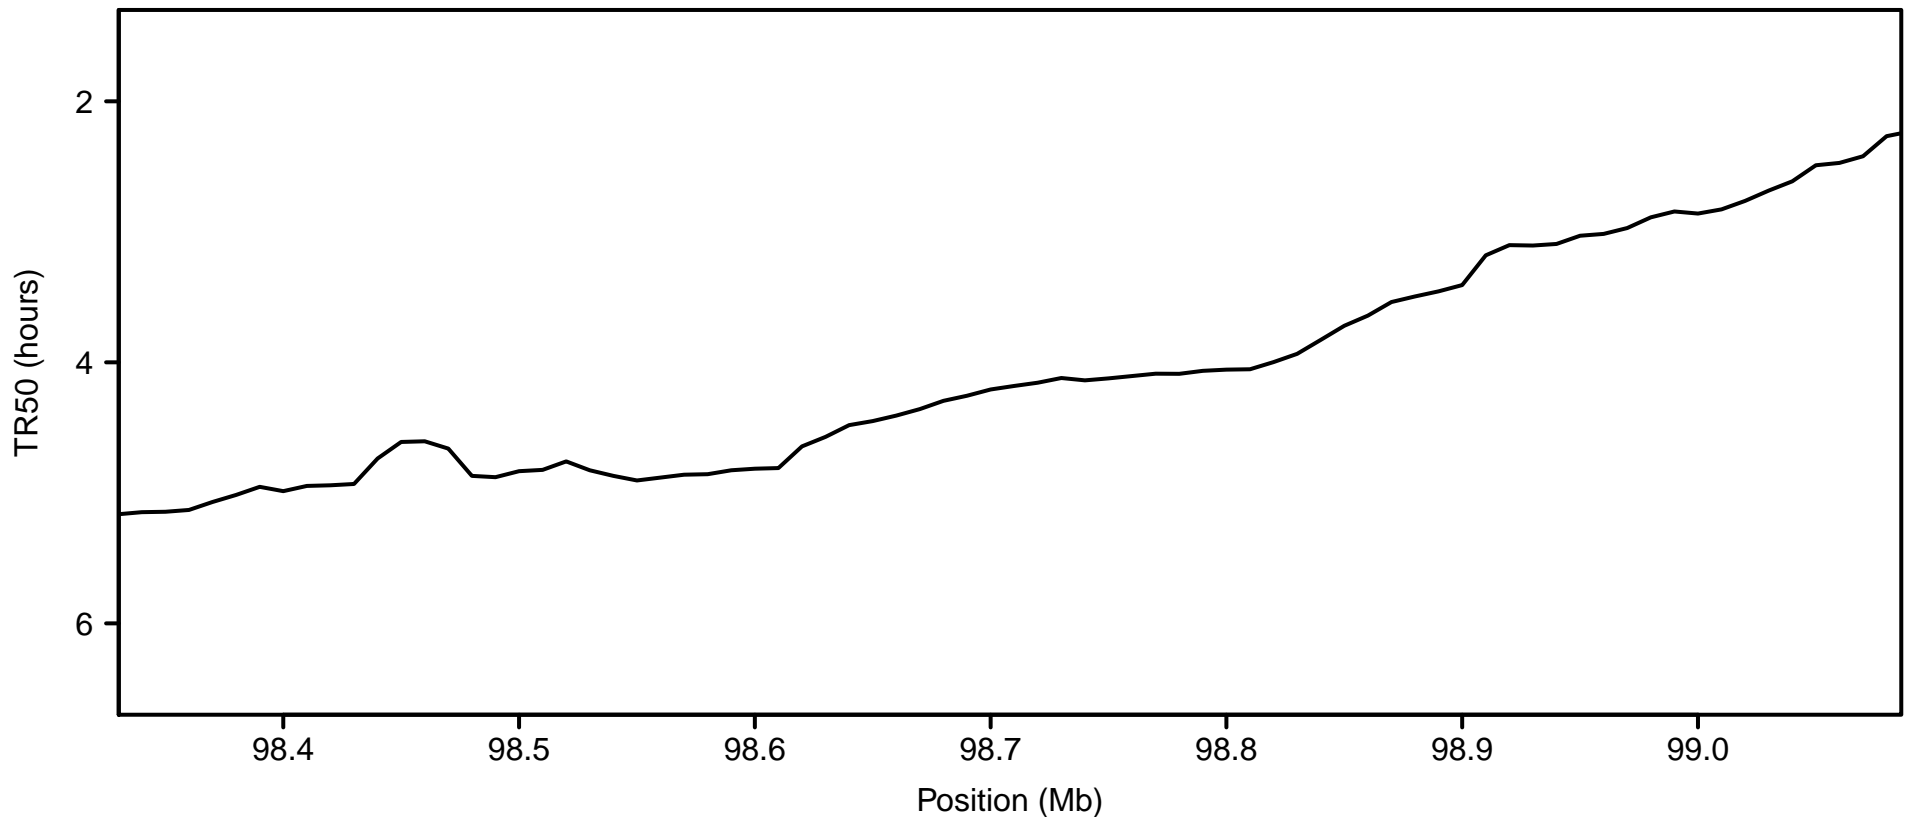

Apparent replication speed

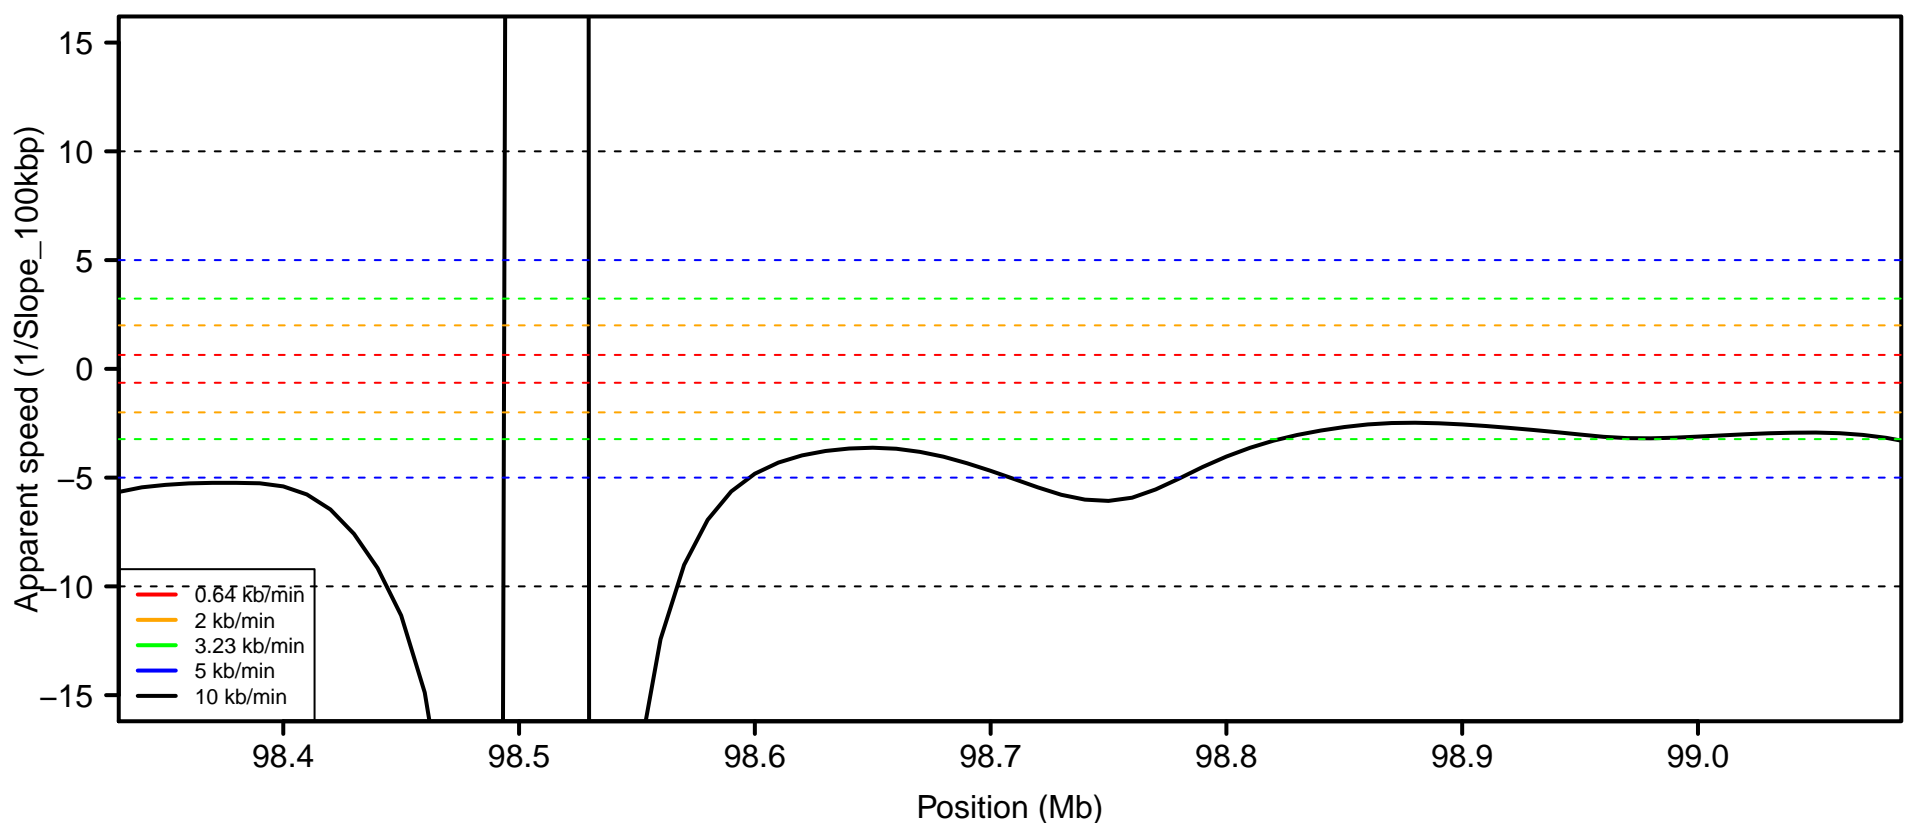

# Replication Timing Vs Encode Origin data, ENr233 (chr15:41520088\_42020088)

Annotation

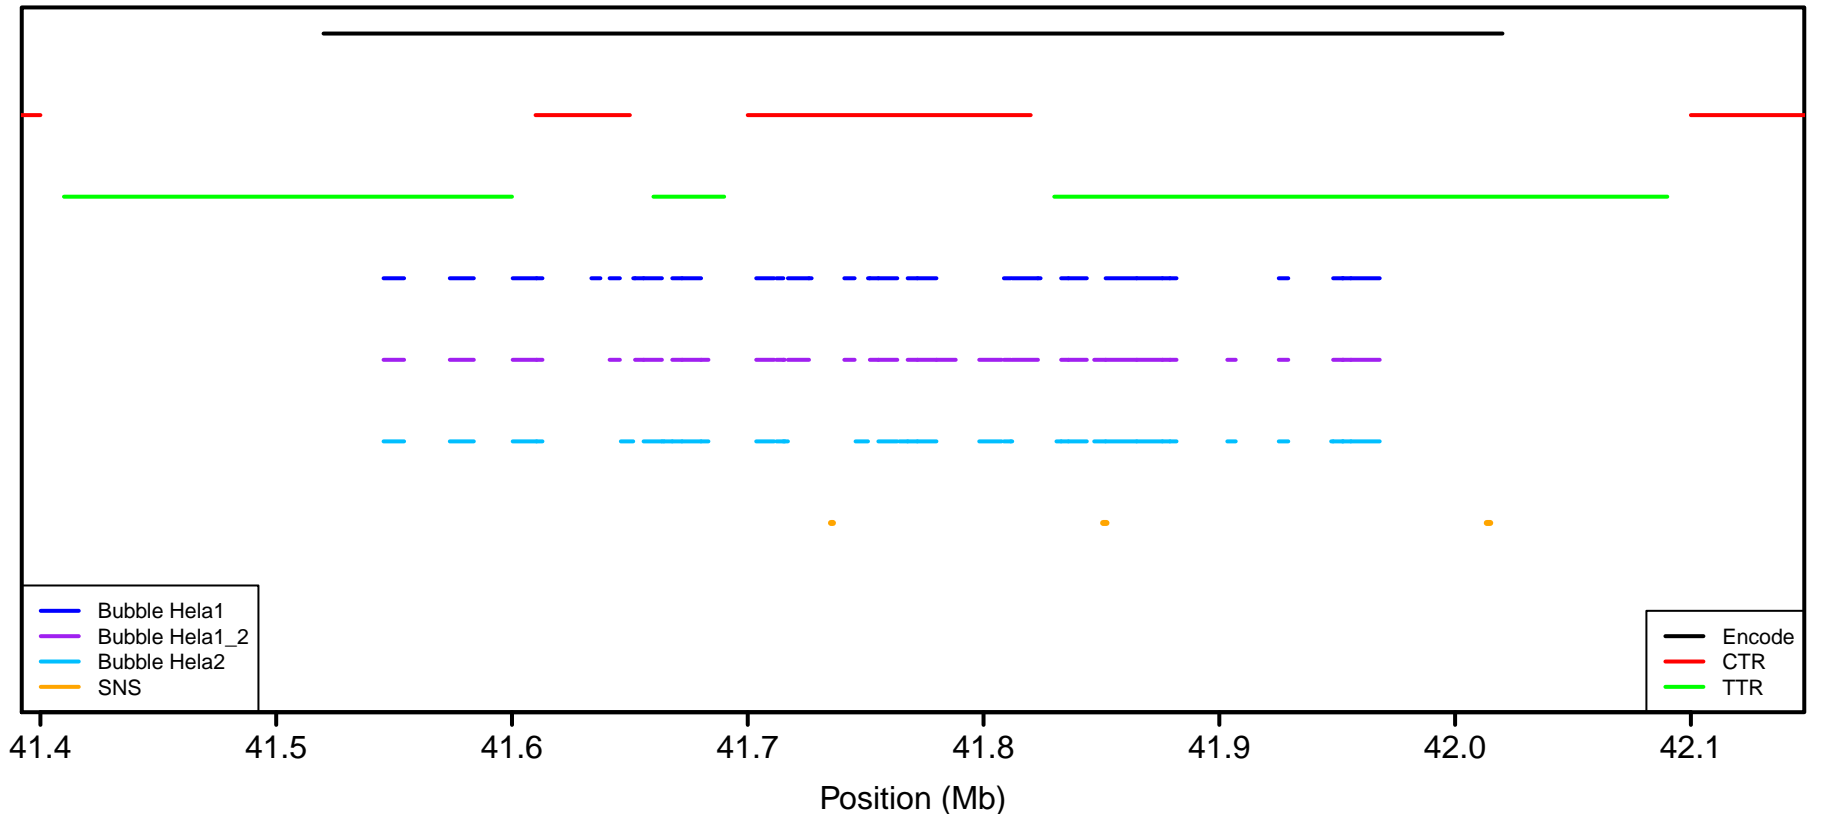

Timing of Hela

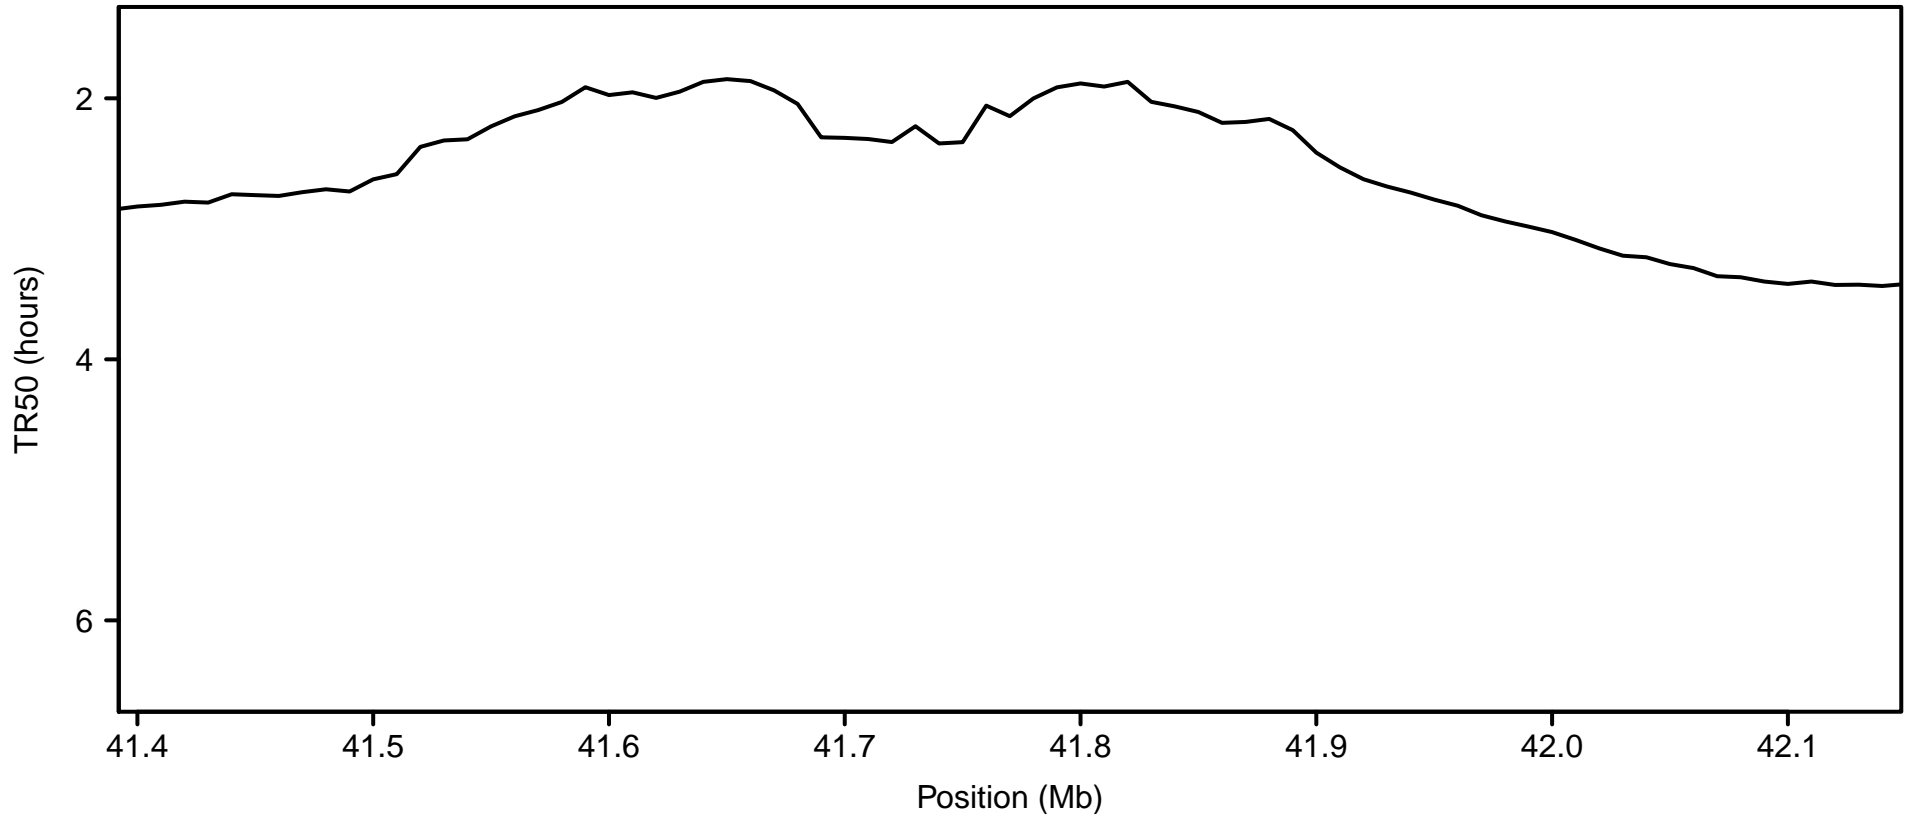

Apparent replication speed

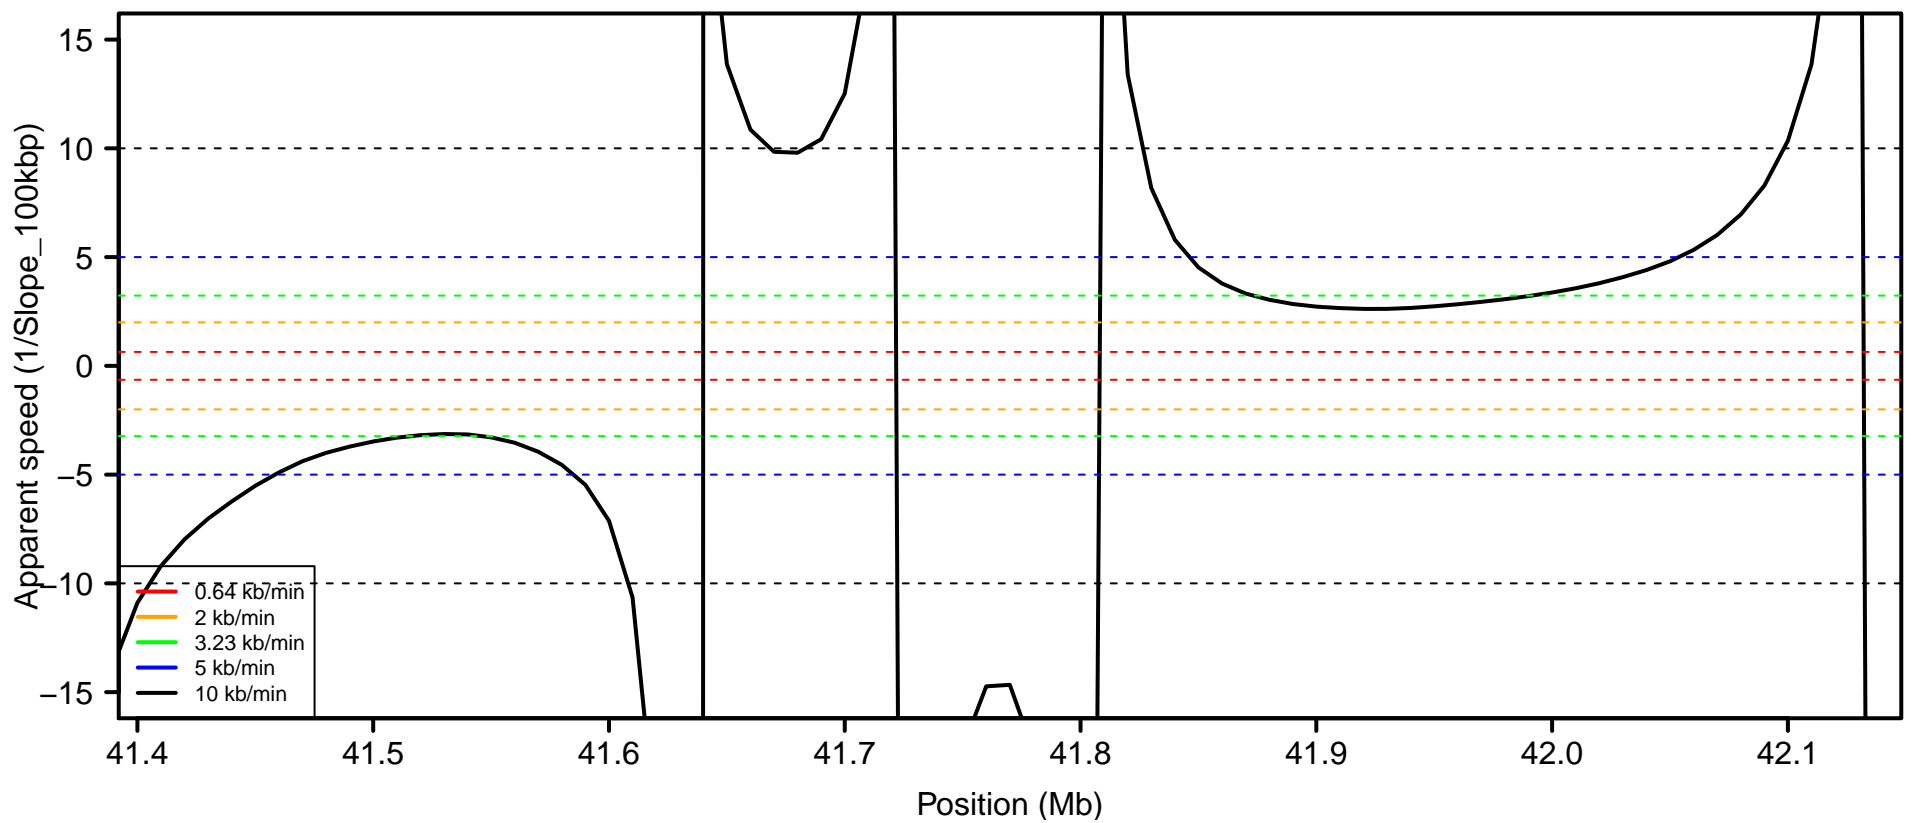



# Replication Timing Vs Encode Origin data, ENm008 (chr16:0\_500000)

## Annotation

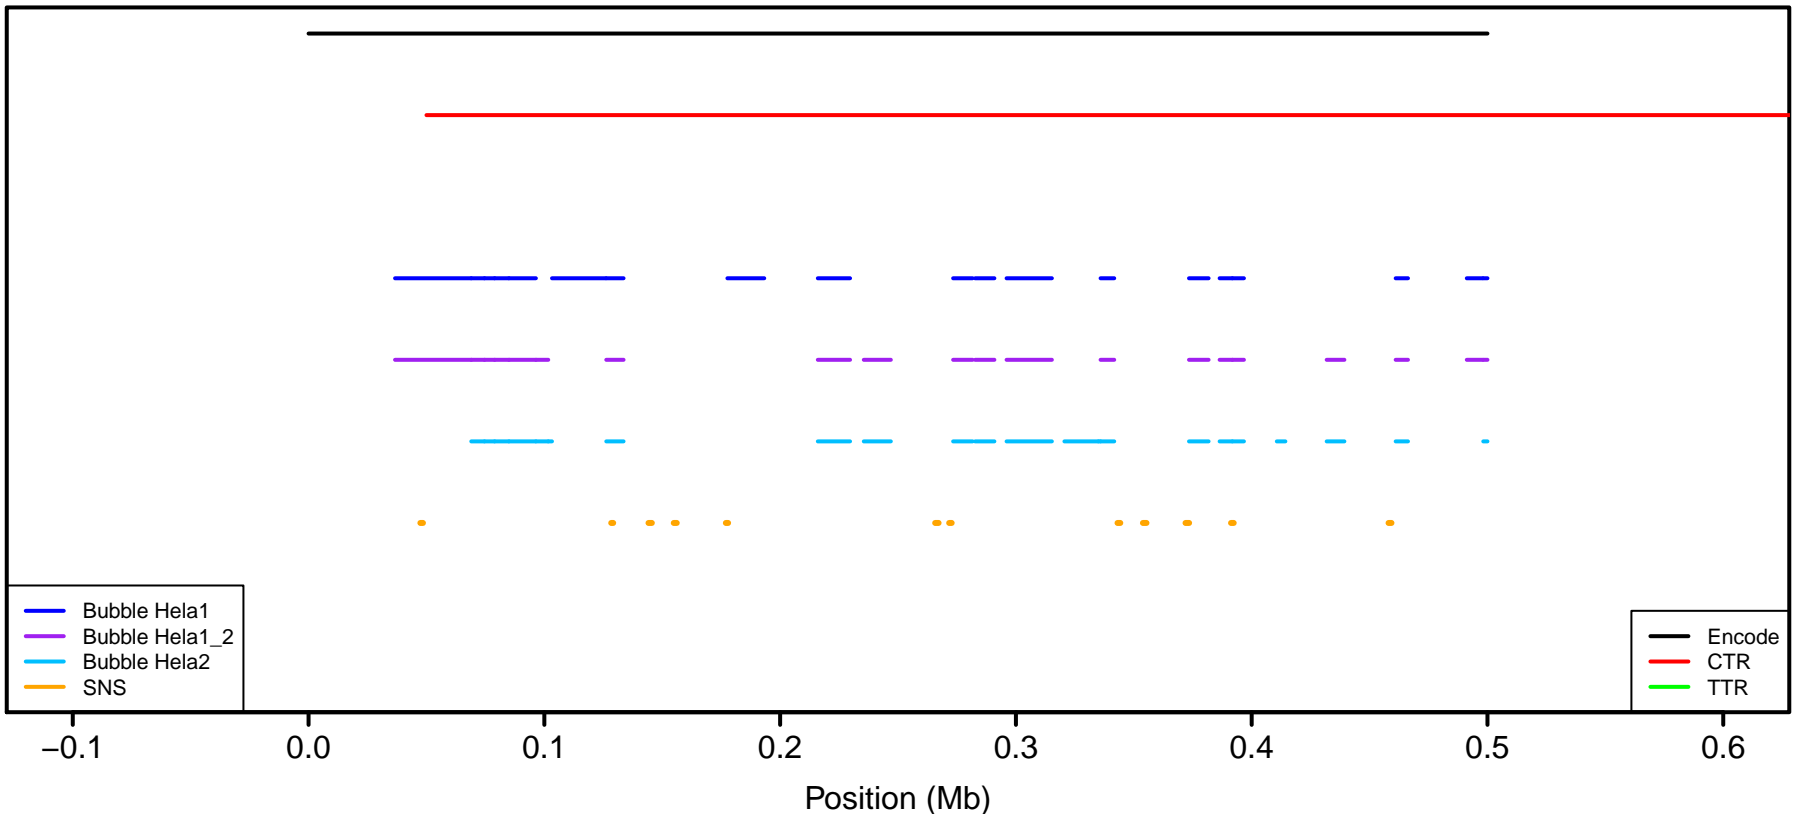

## Timing of Helal

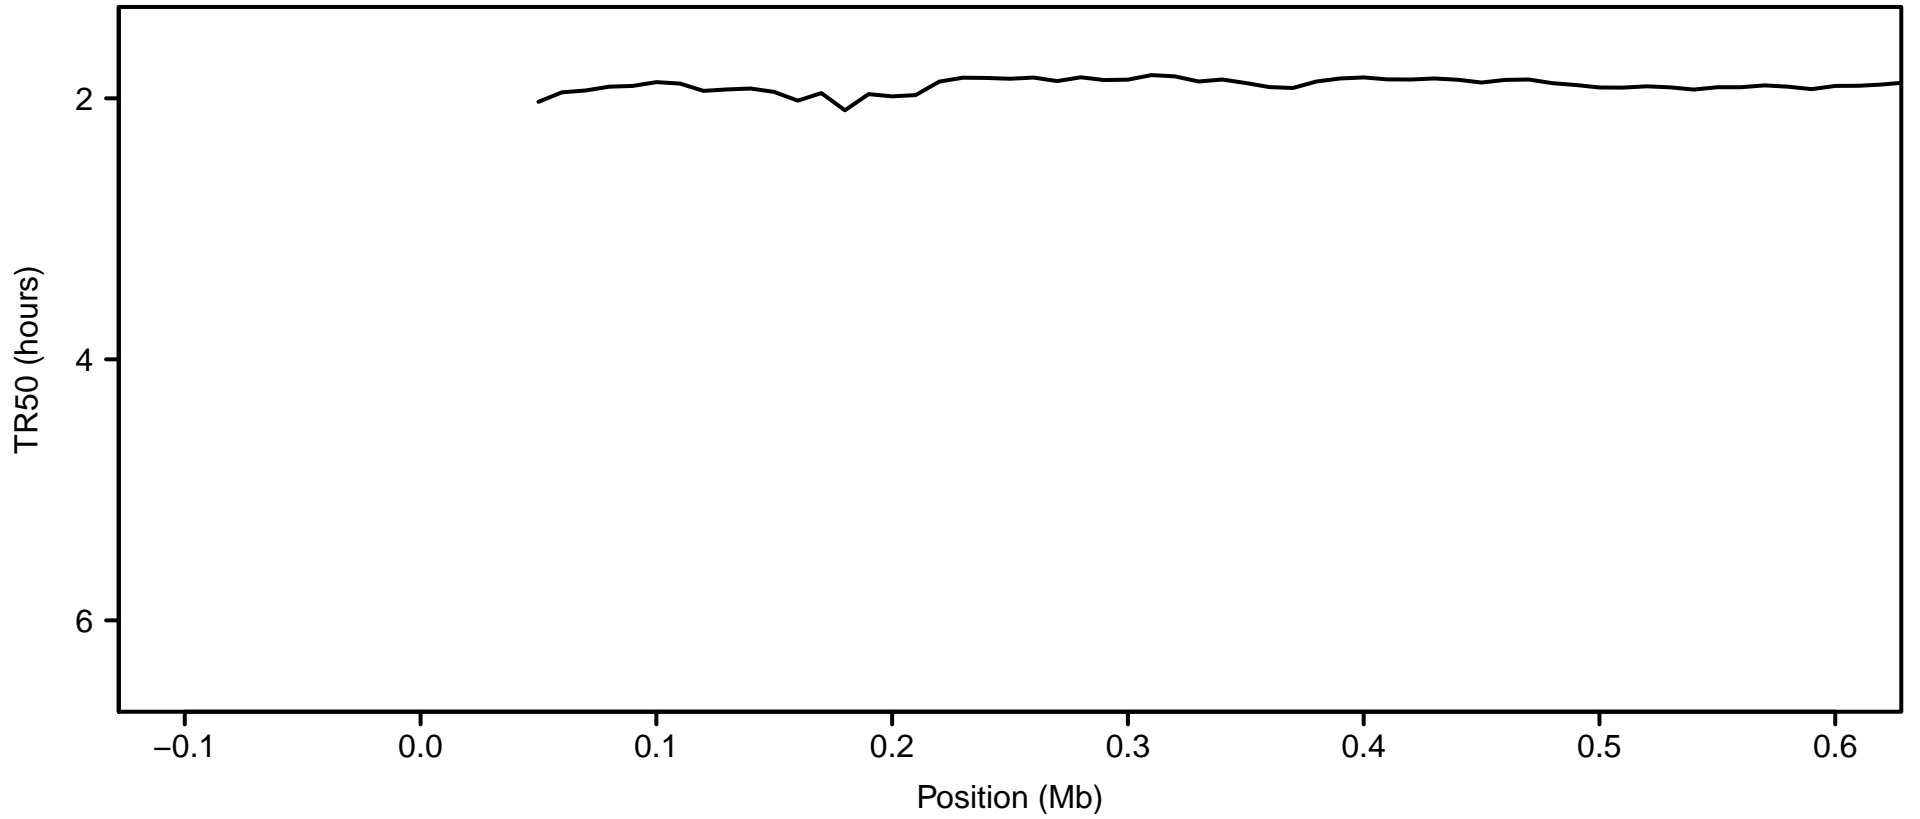

## Apparent replication speed

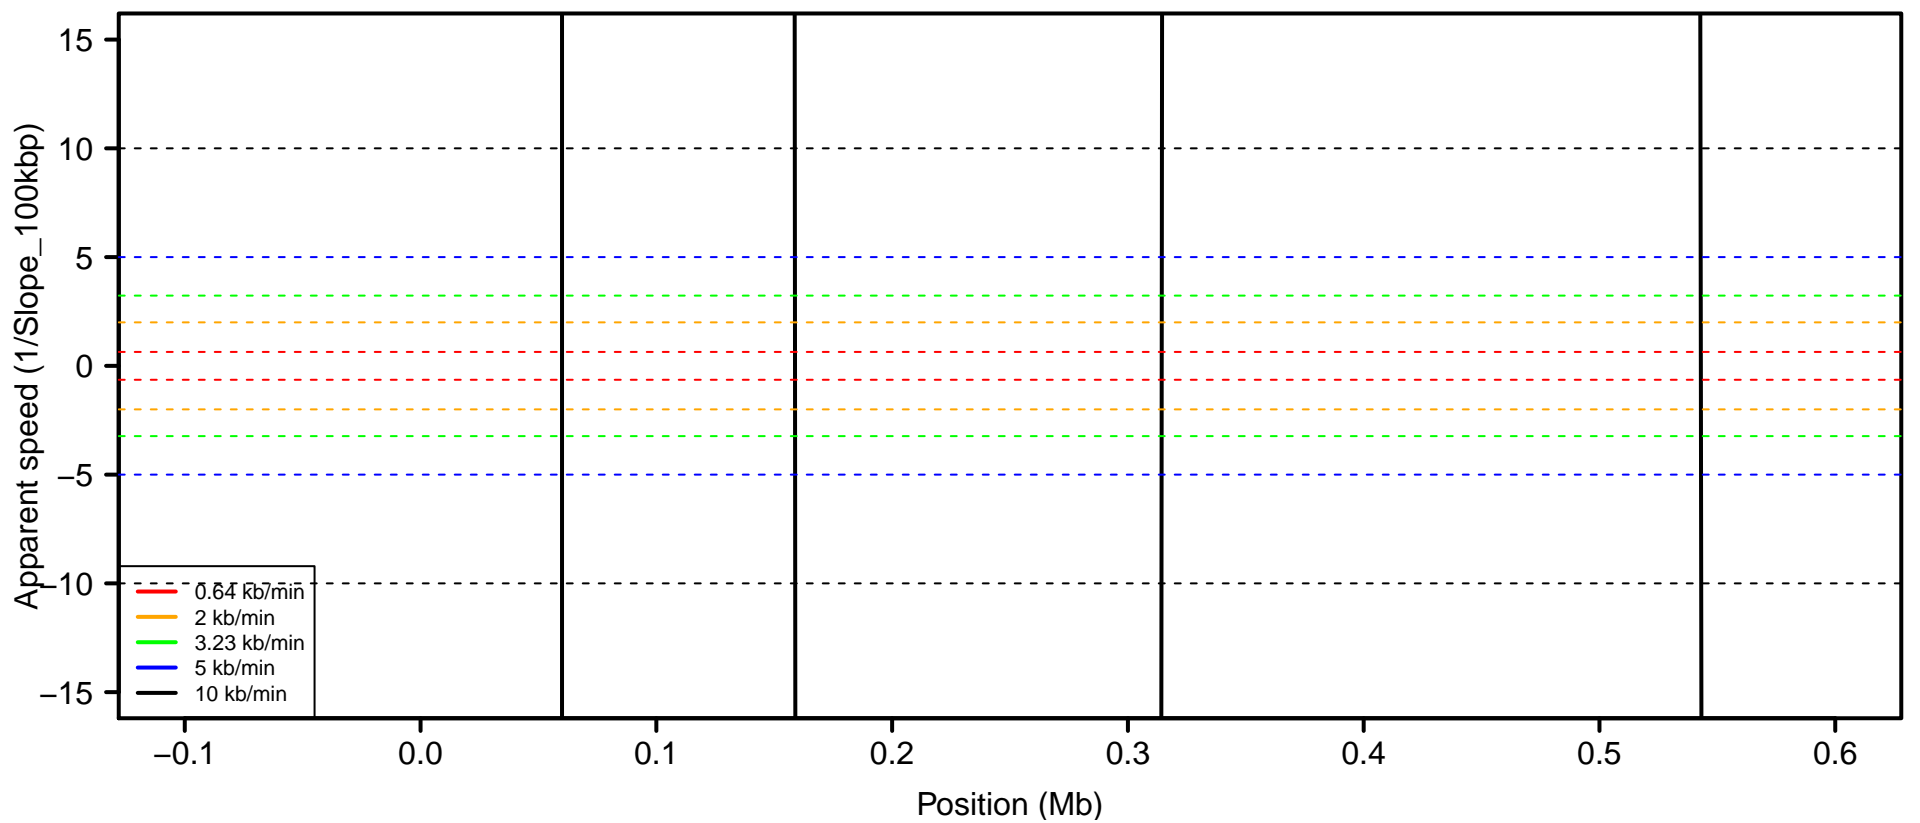

# Replication Timing Vs Encode Origin data, ENr211 (chr16:25780427\_26280428)

Annotation

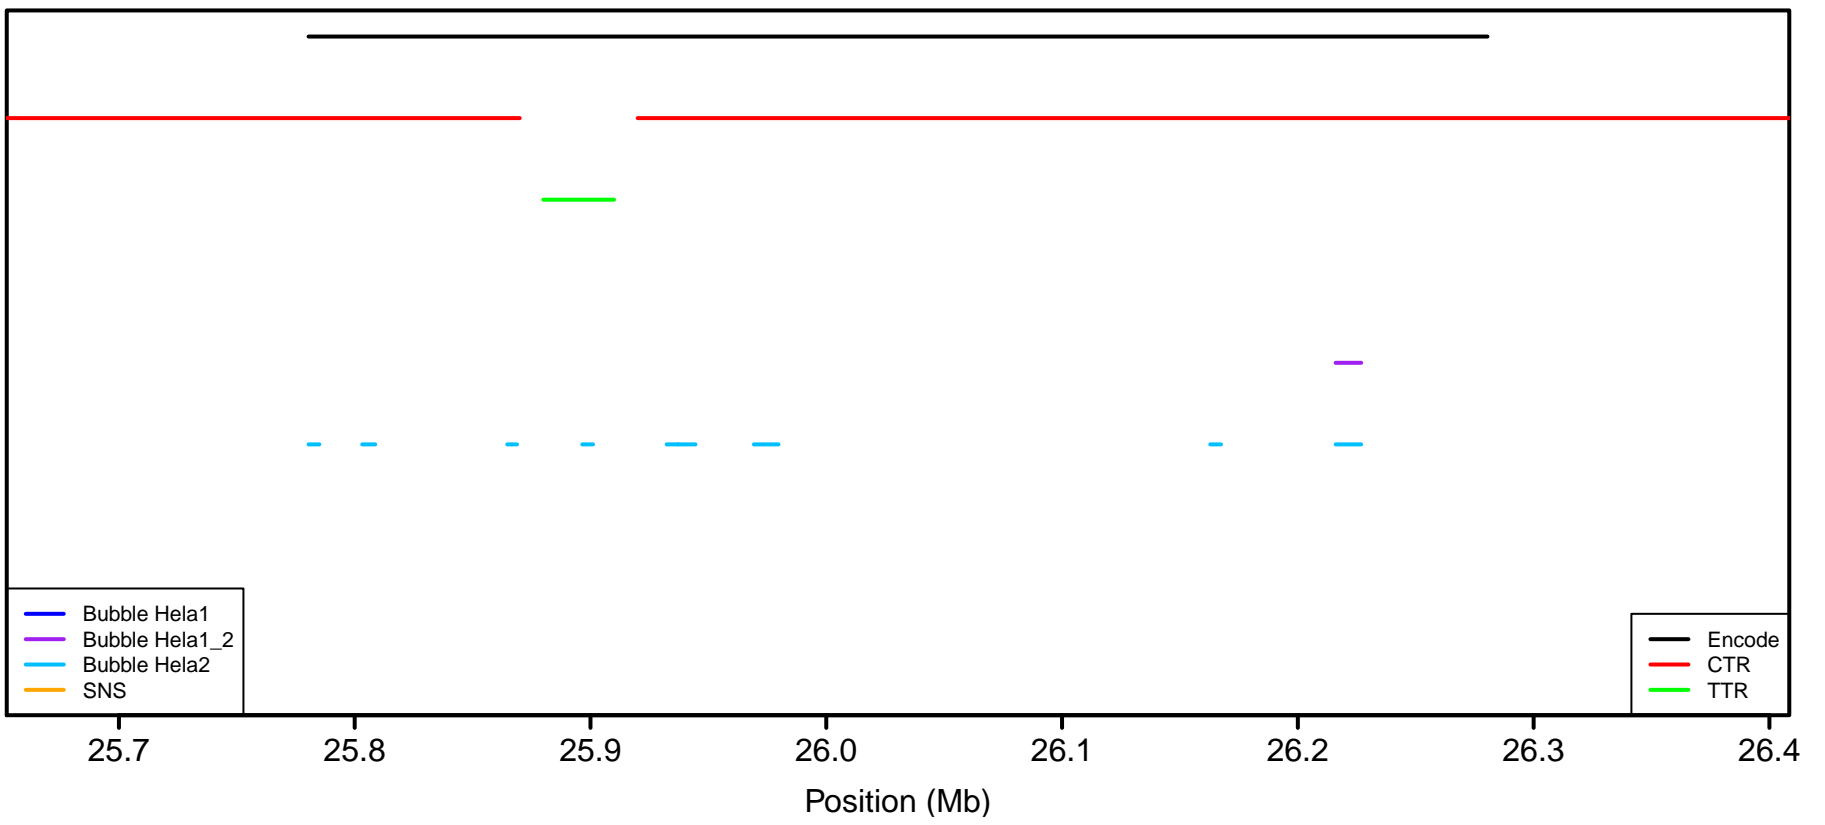

Timing of HeLa

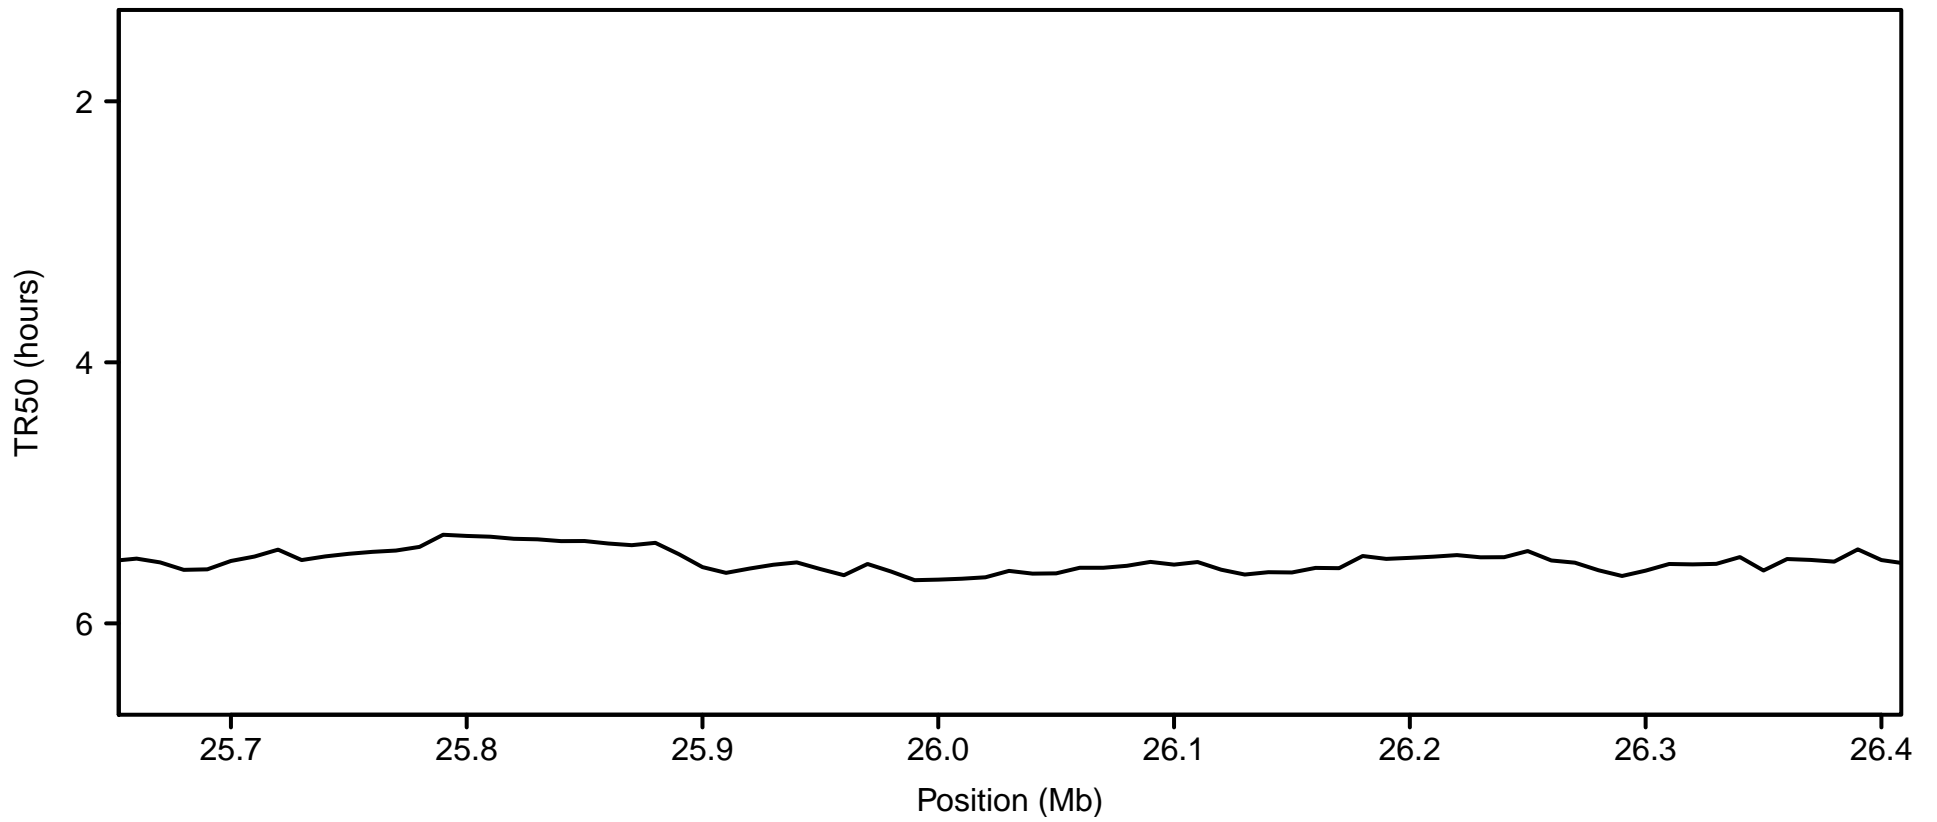

Apparent replication speed

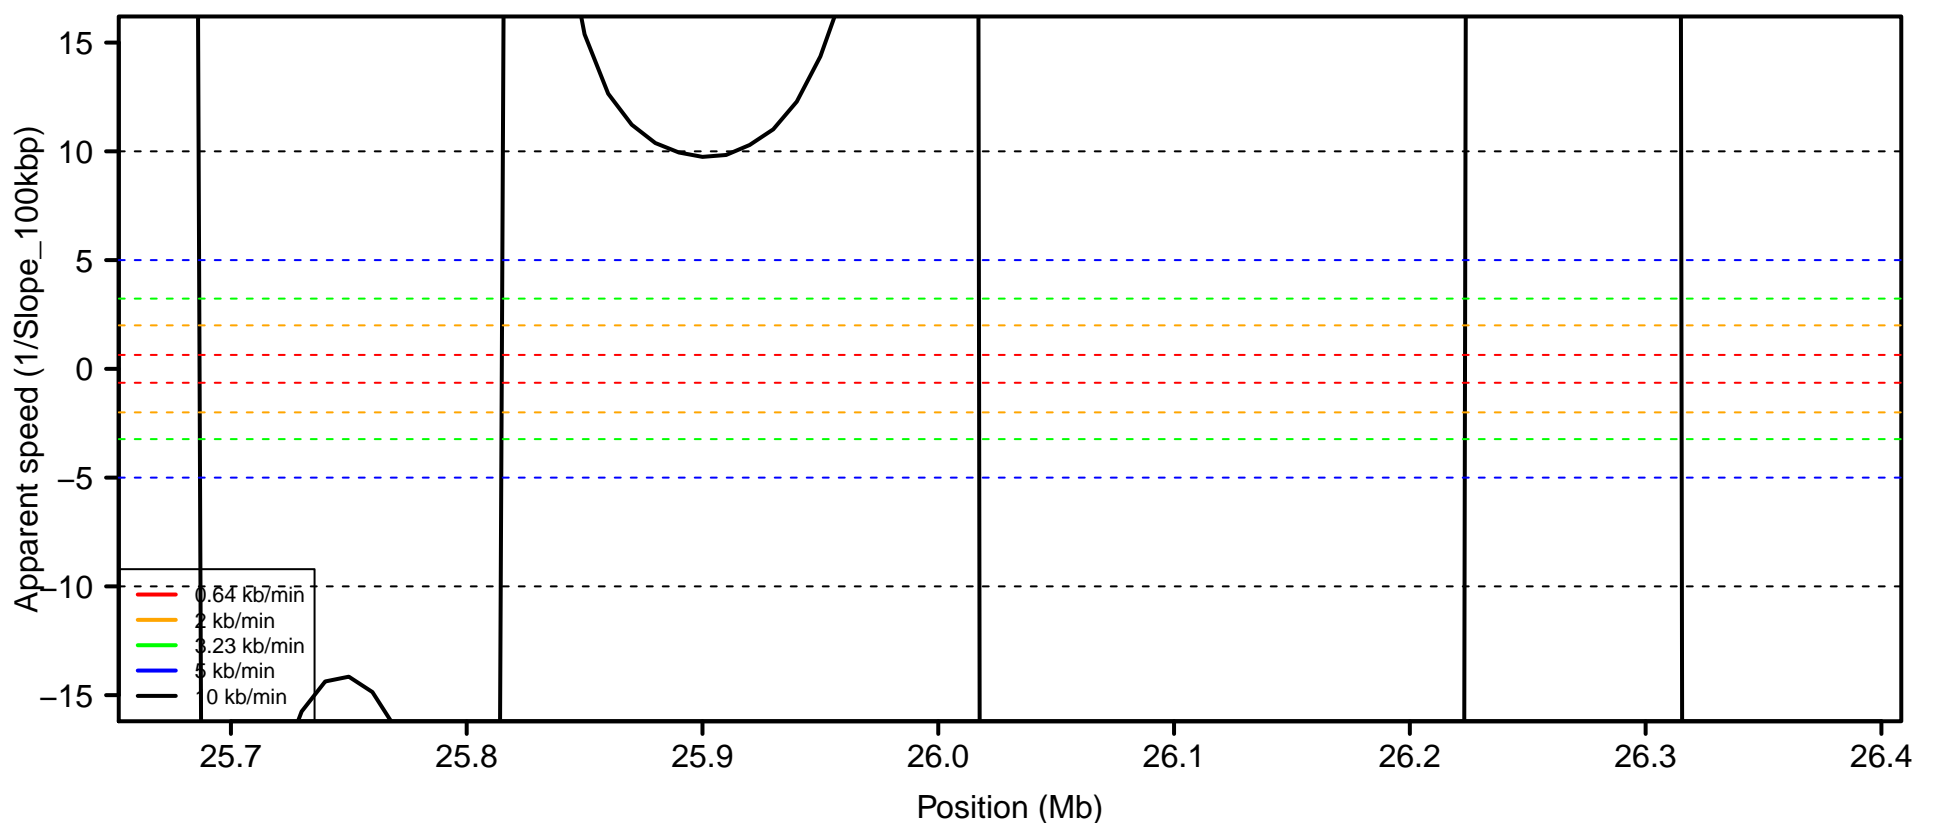

# Replication Timing Vs Encode Origin data, ENr313 (chr16:60833949\_61333949)

Annotation

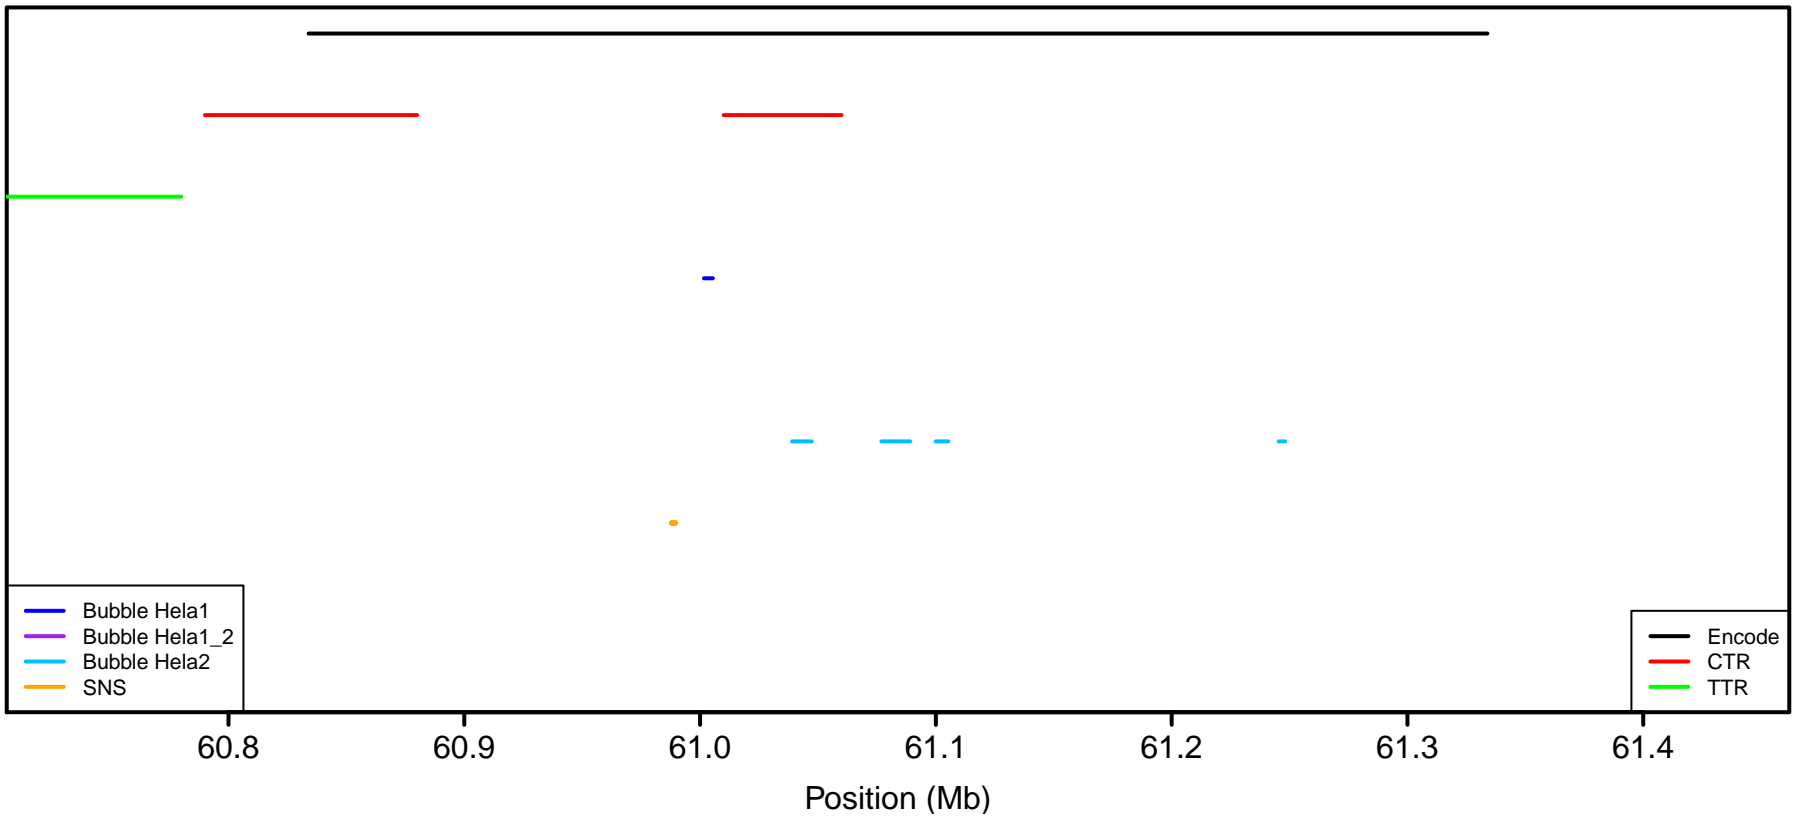

Timing of HeLa

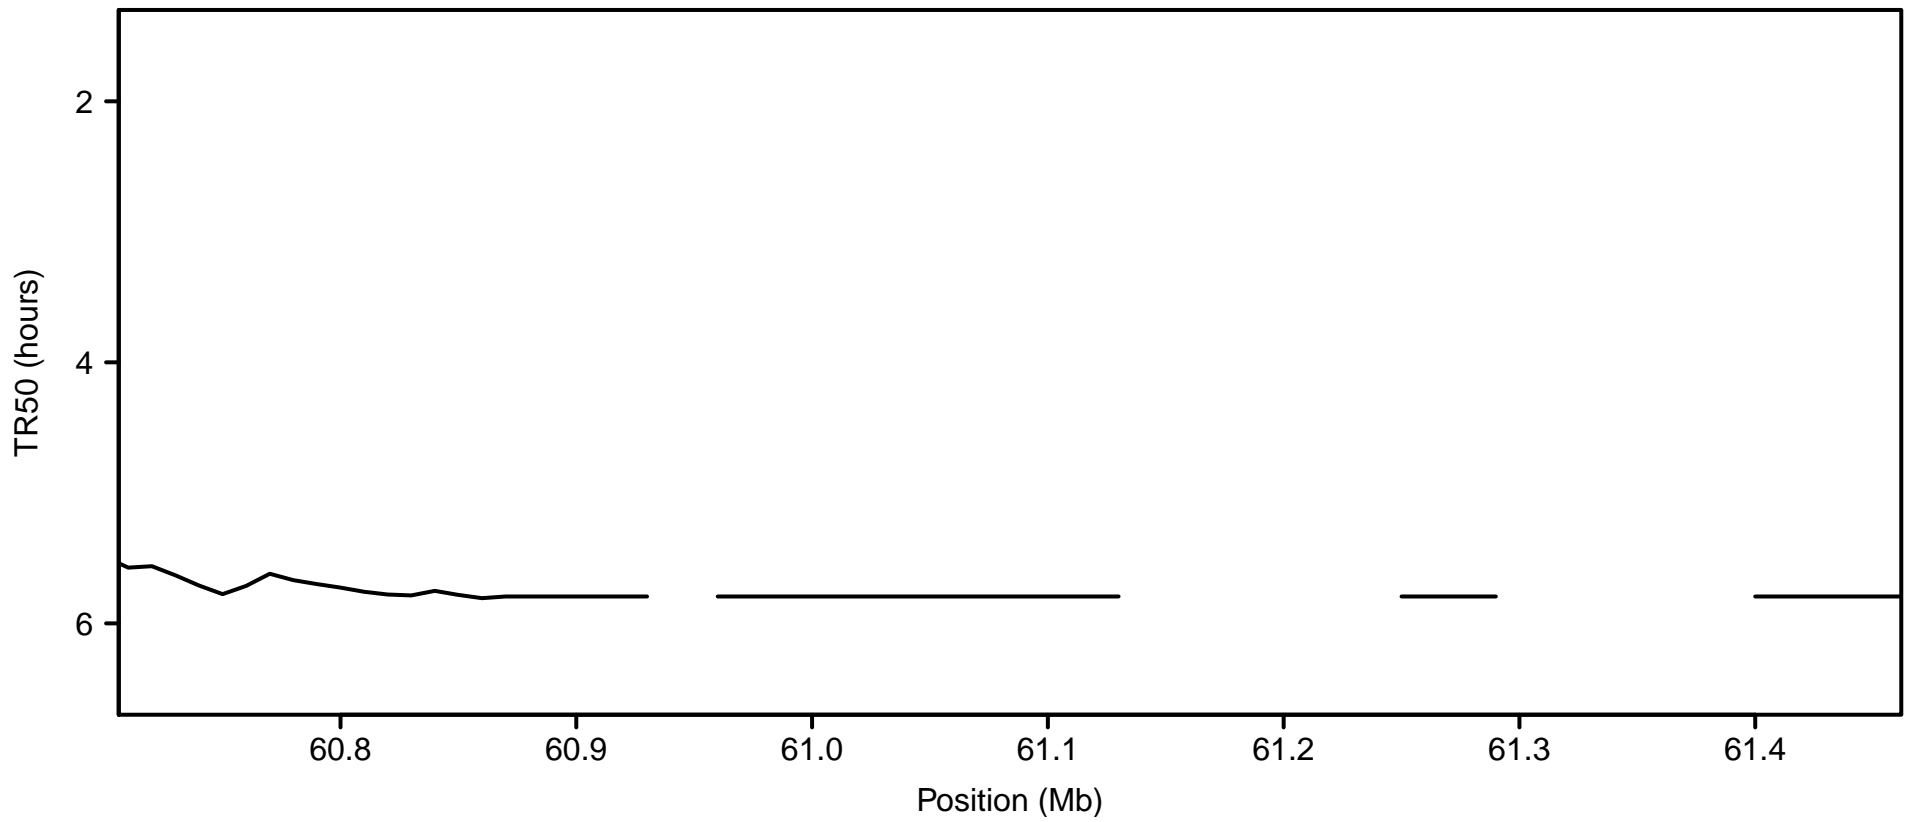

Apparent replication speed

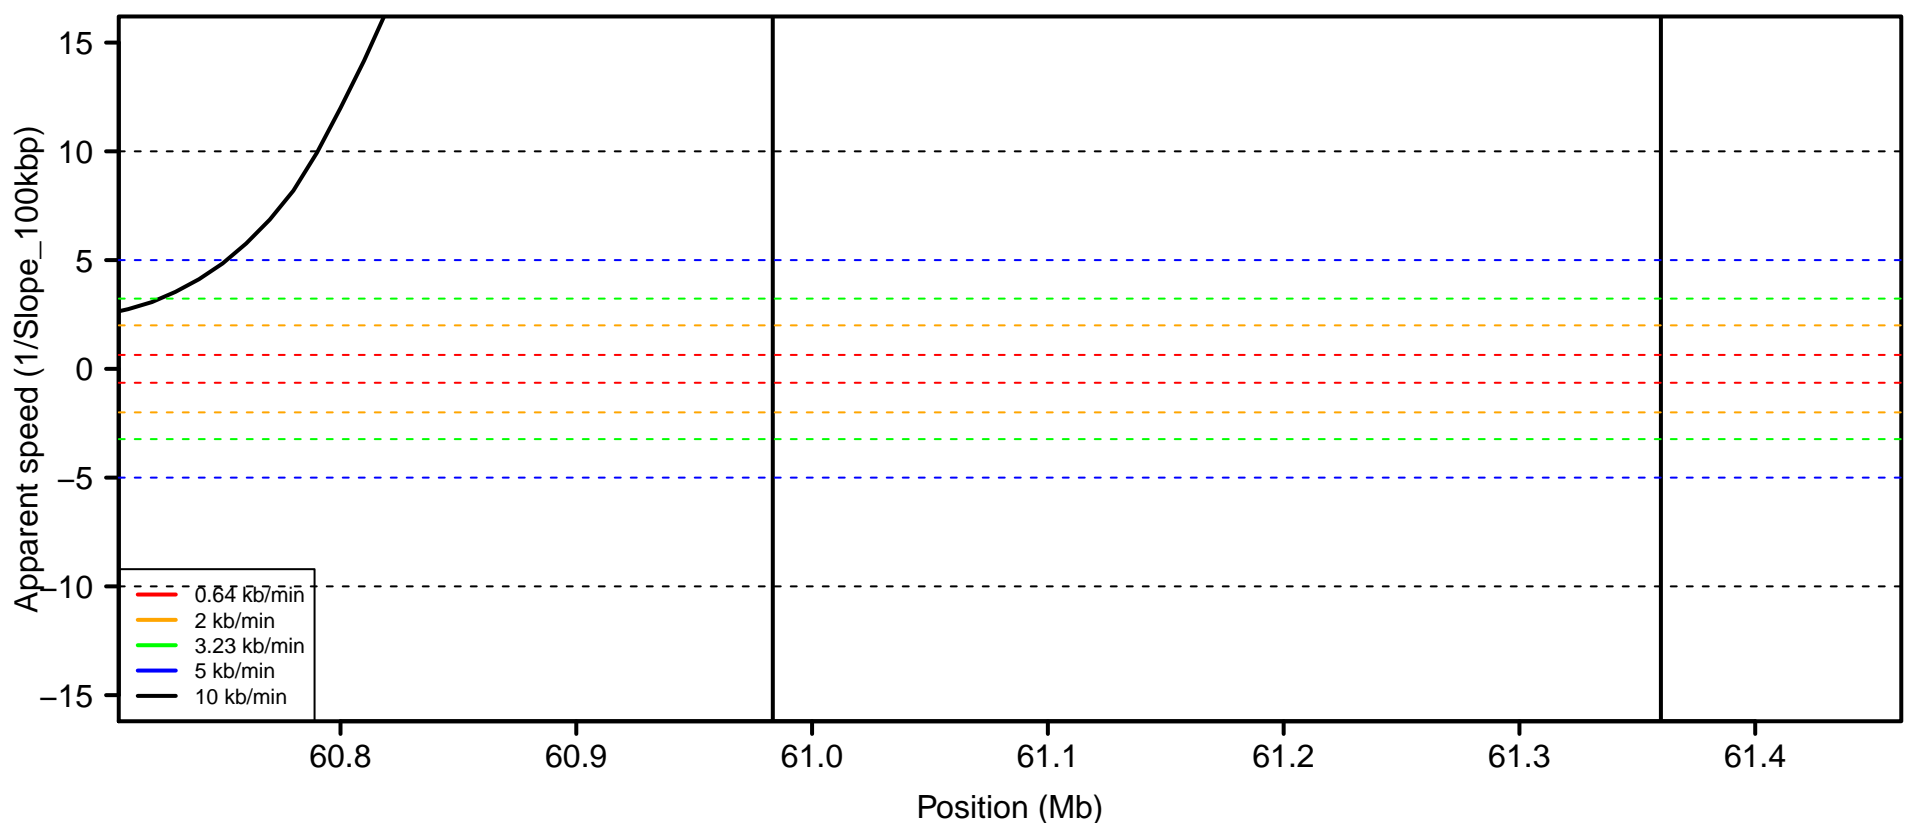

# Replication Timing Vs Encode Origin data, ENr213 (chr18:23719231\_24219231)

Annotation

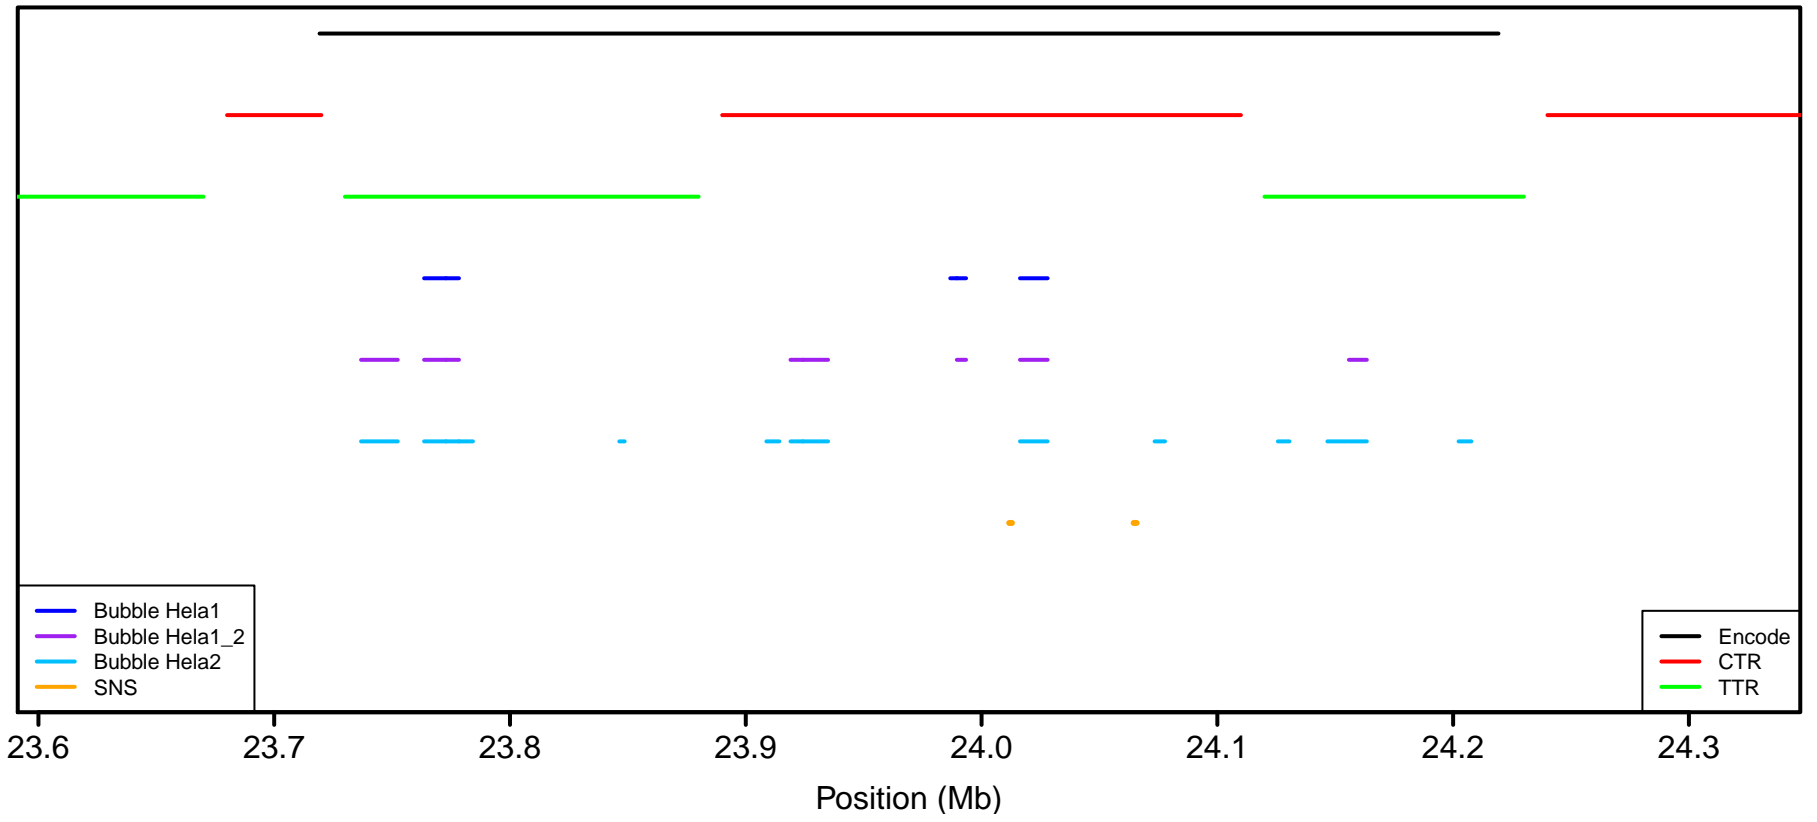

Timing of Hela

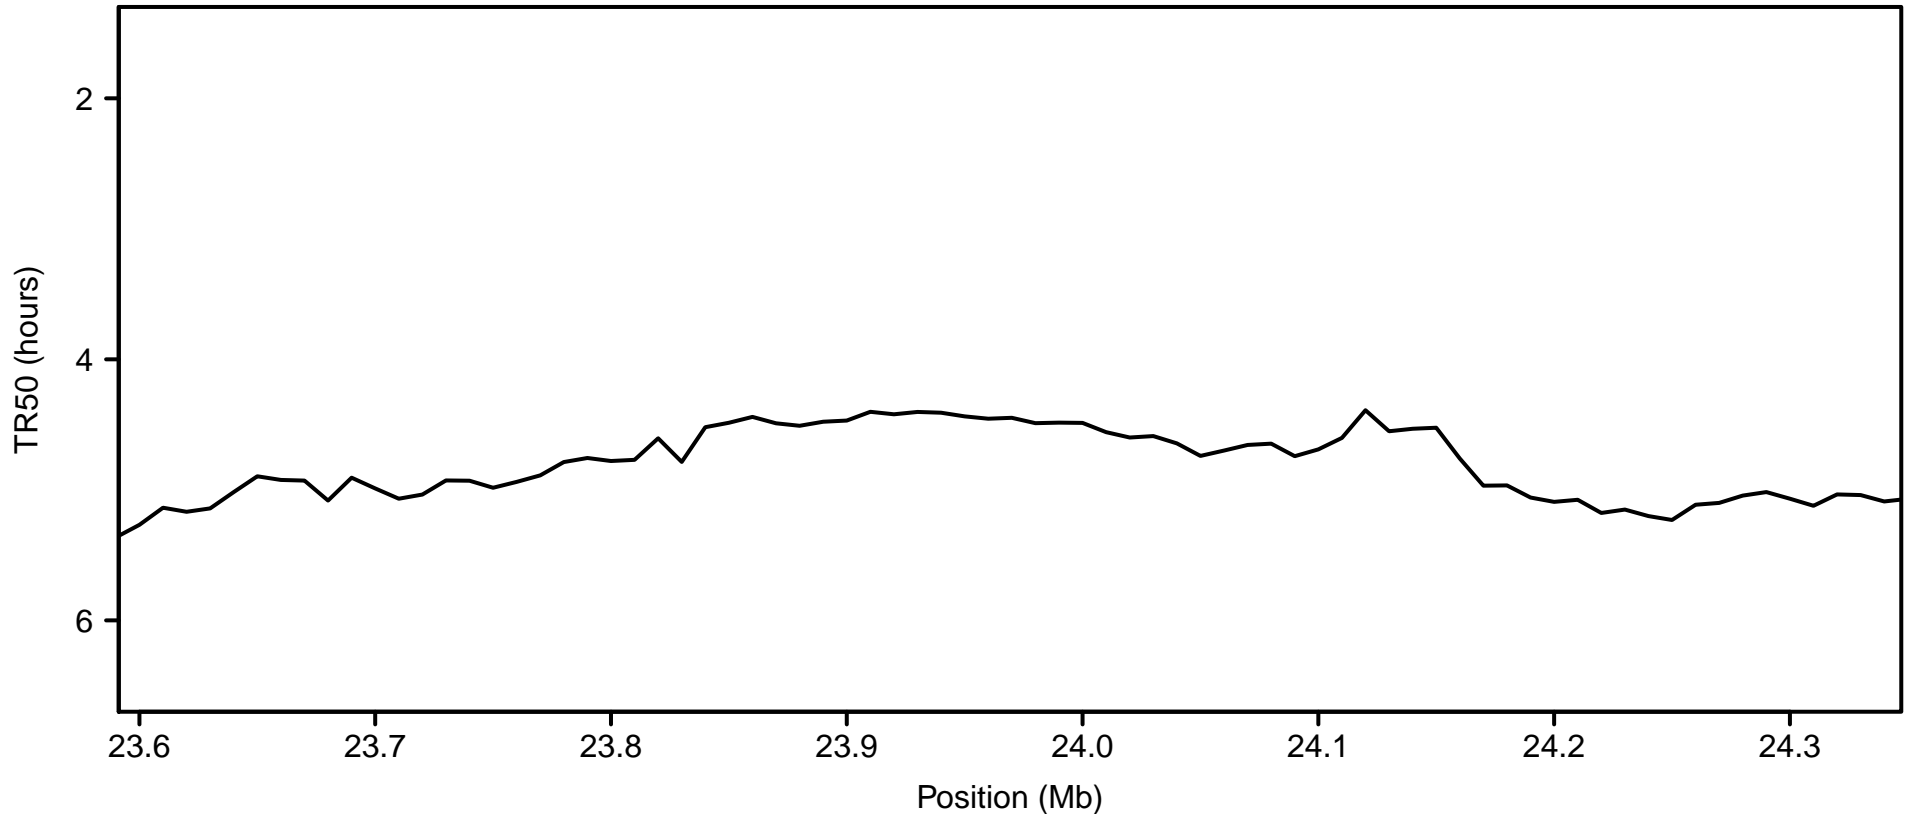

Apparent replication speed

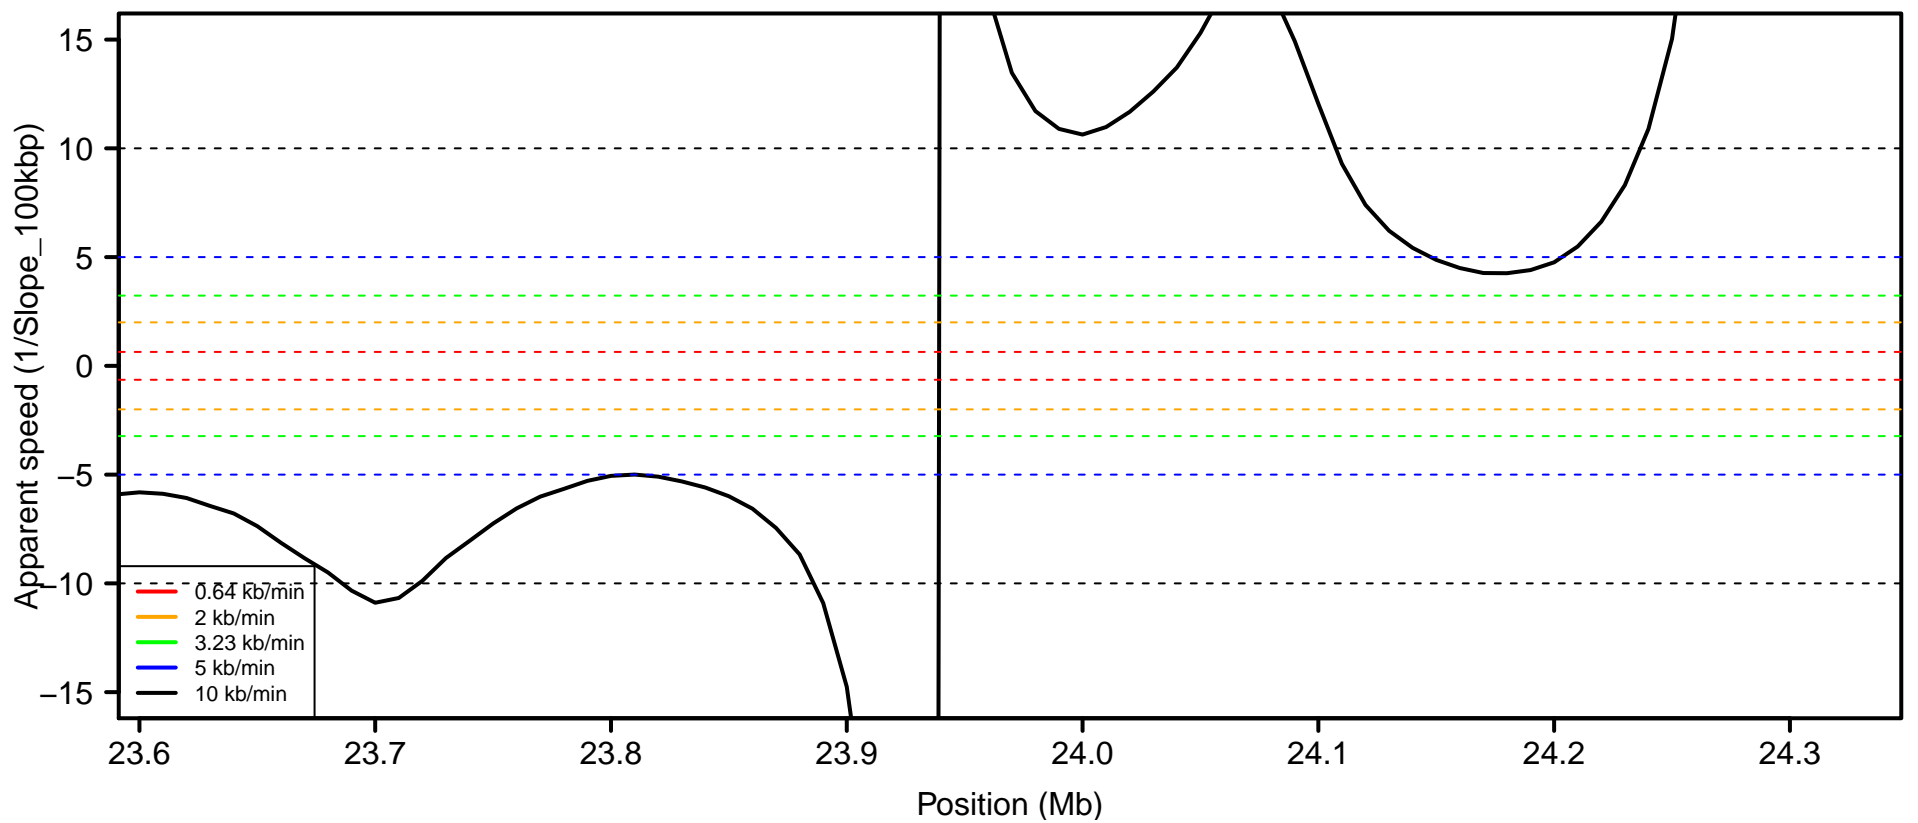

# Replication Timing Vs Encode Origin data, ENr122 (chr18:59412300\_59912300)

Annotation

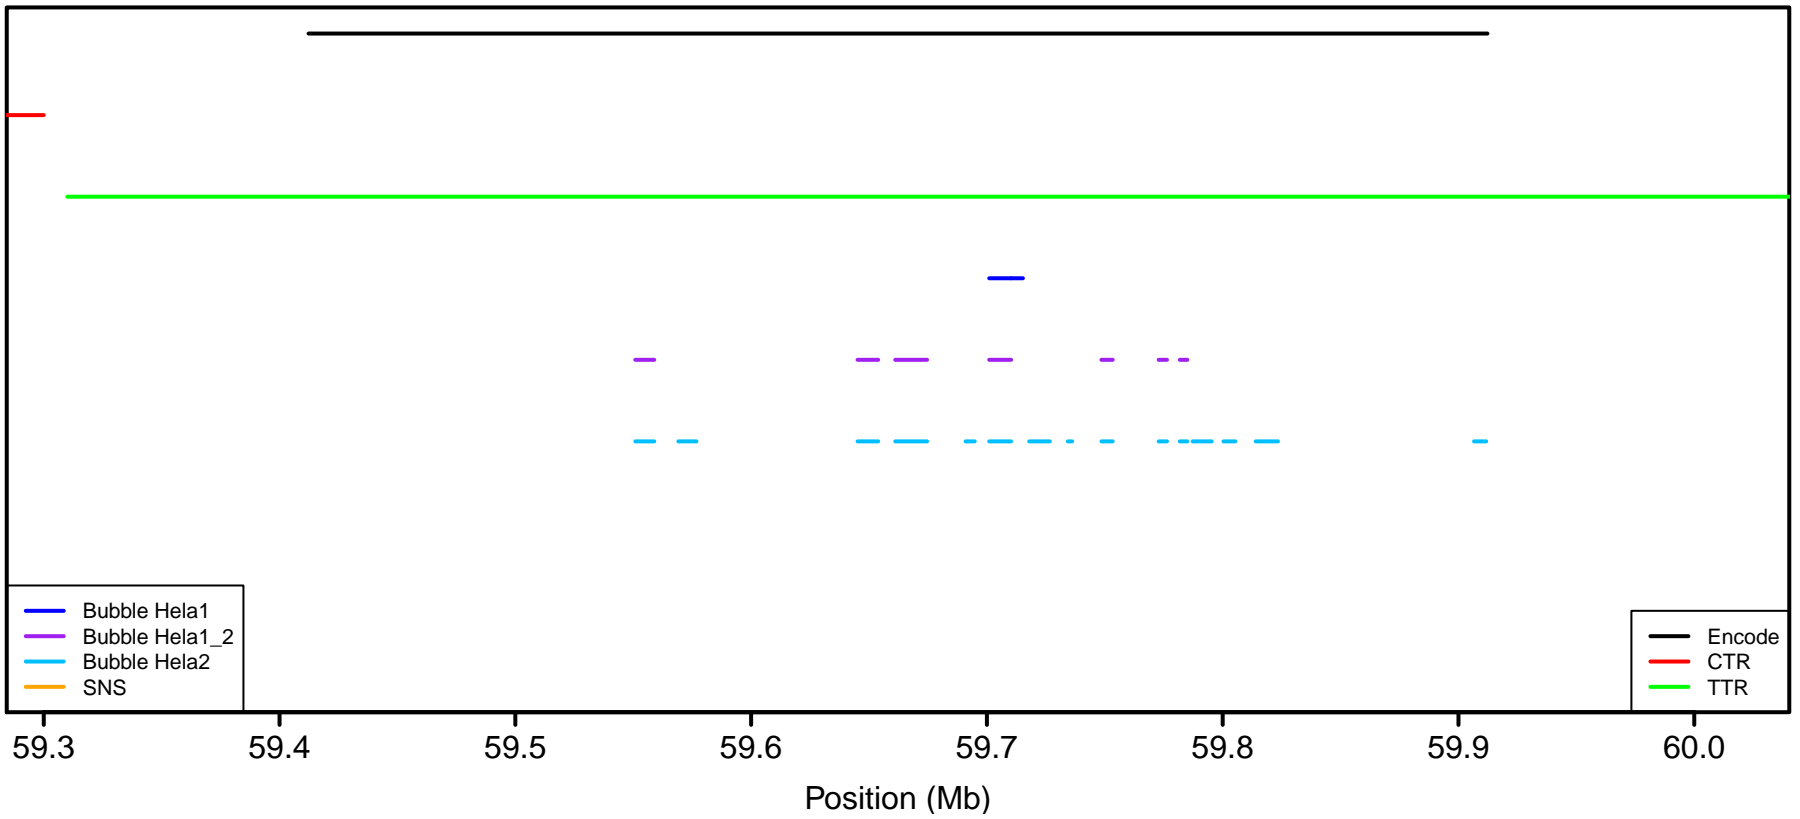

Timing of Hela

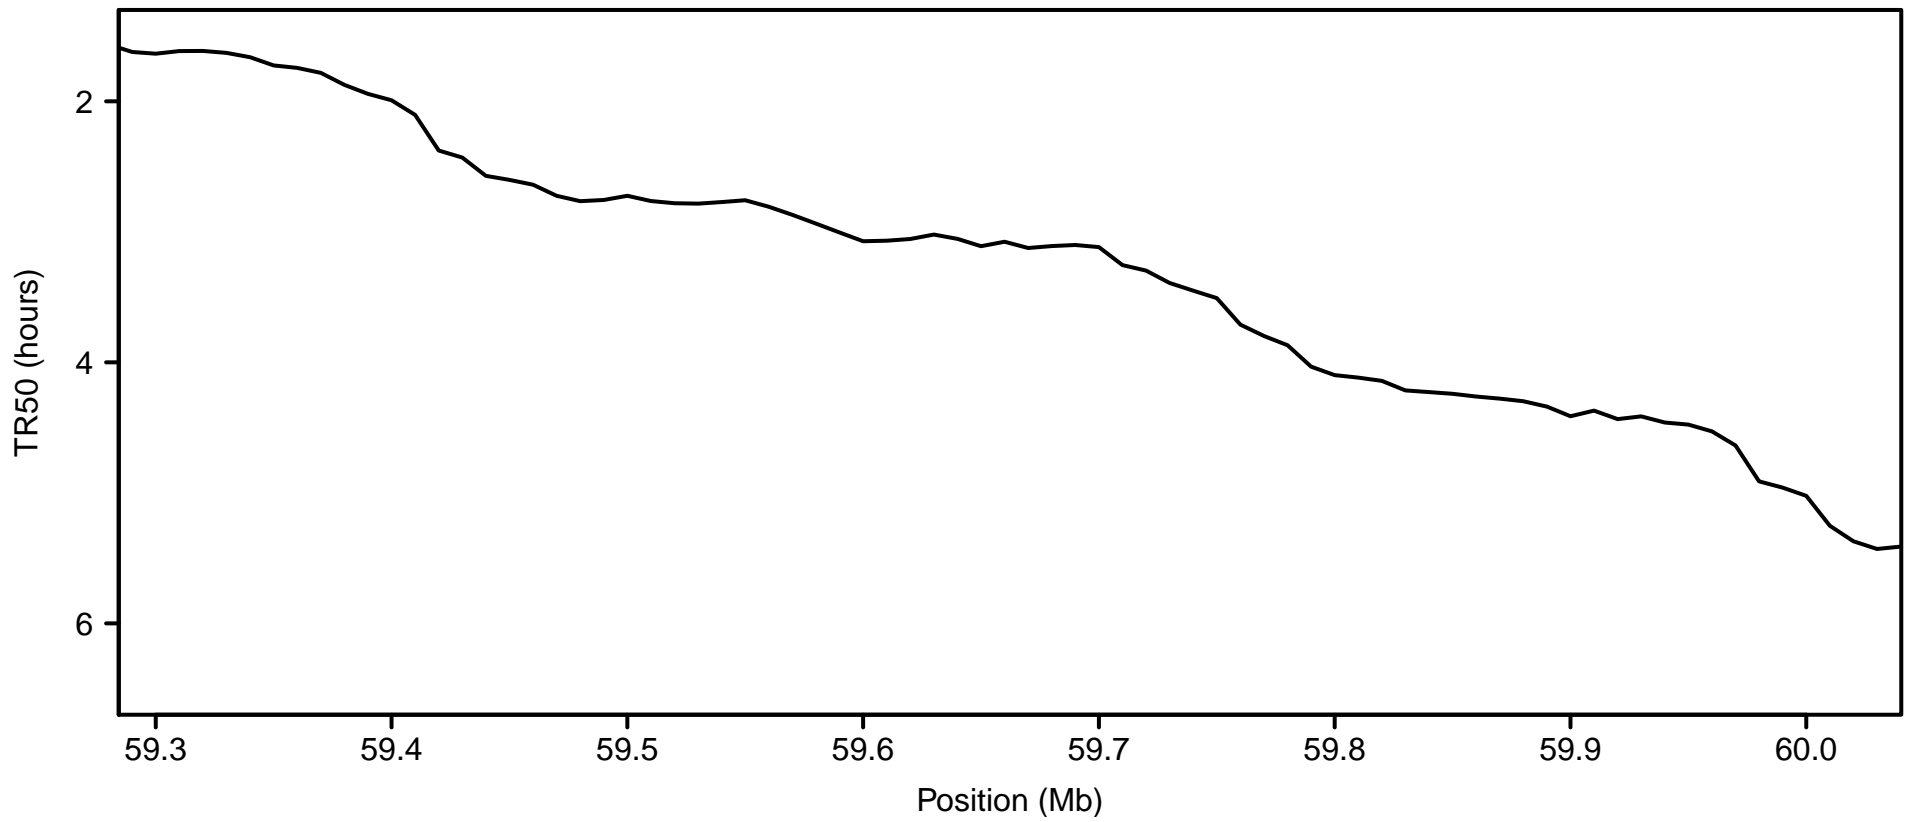

Apparent replication speed

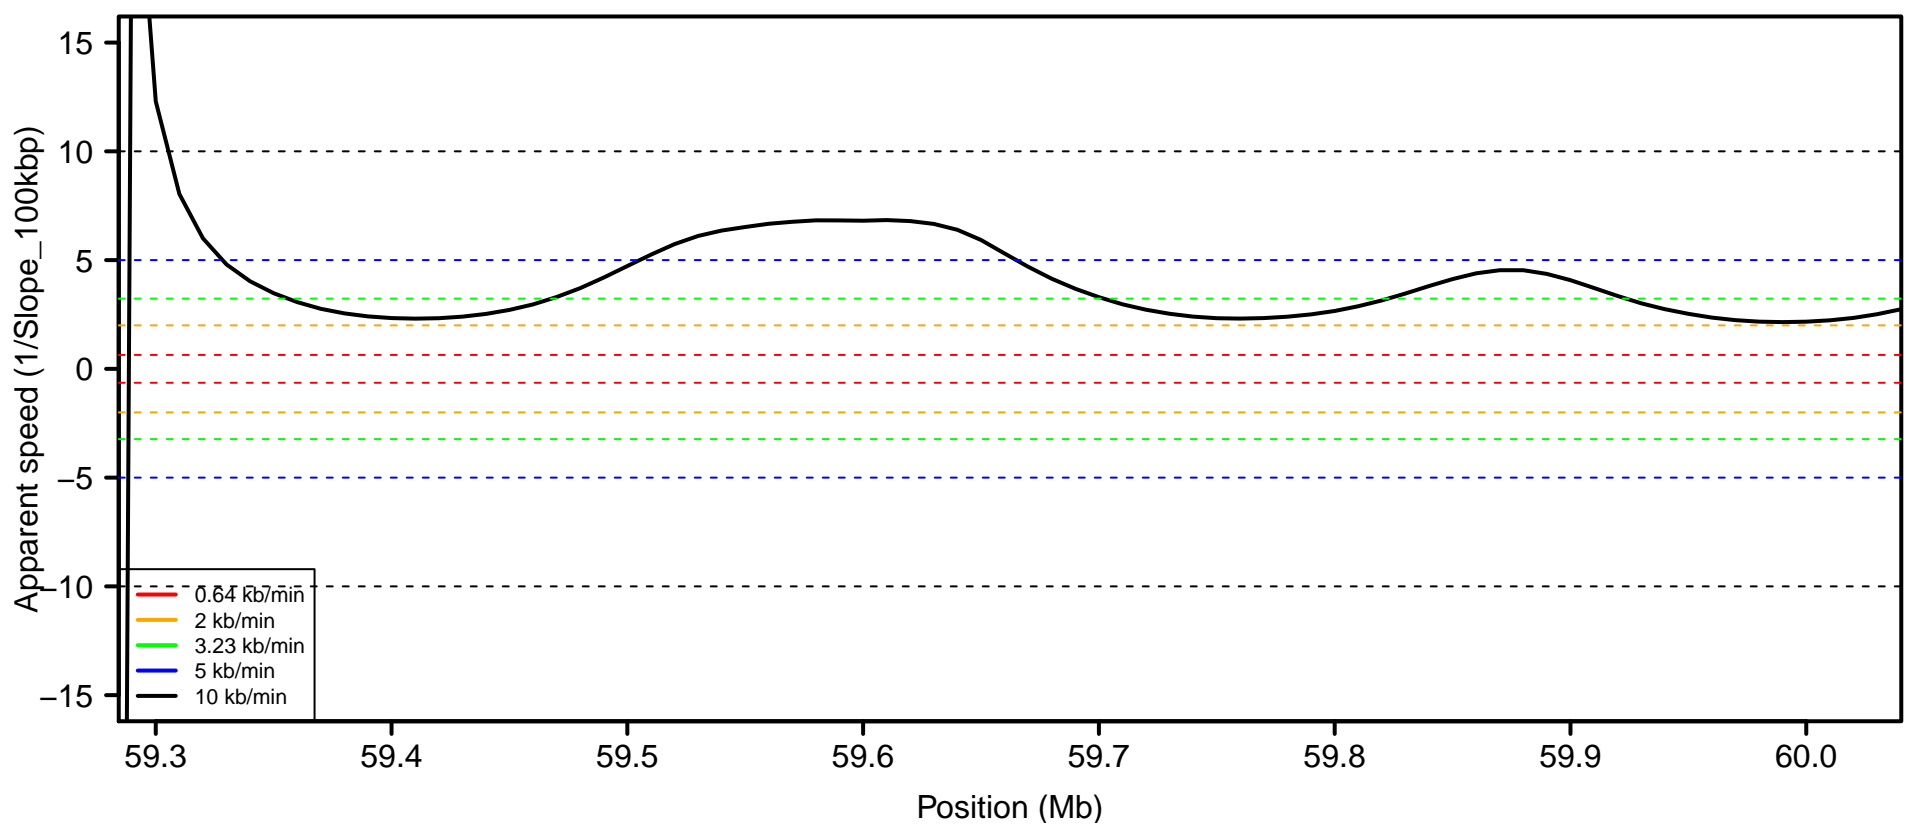

# Replication Timing Vs Encode Origin data, ENm007 (chr19:59023584\_60024460)

Annotation

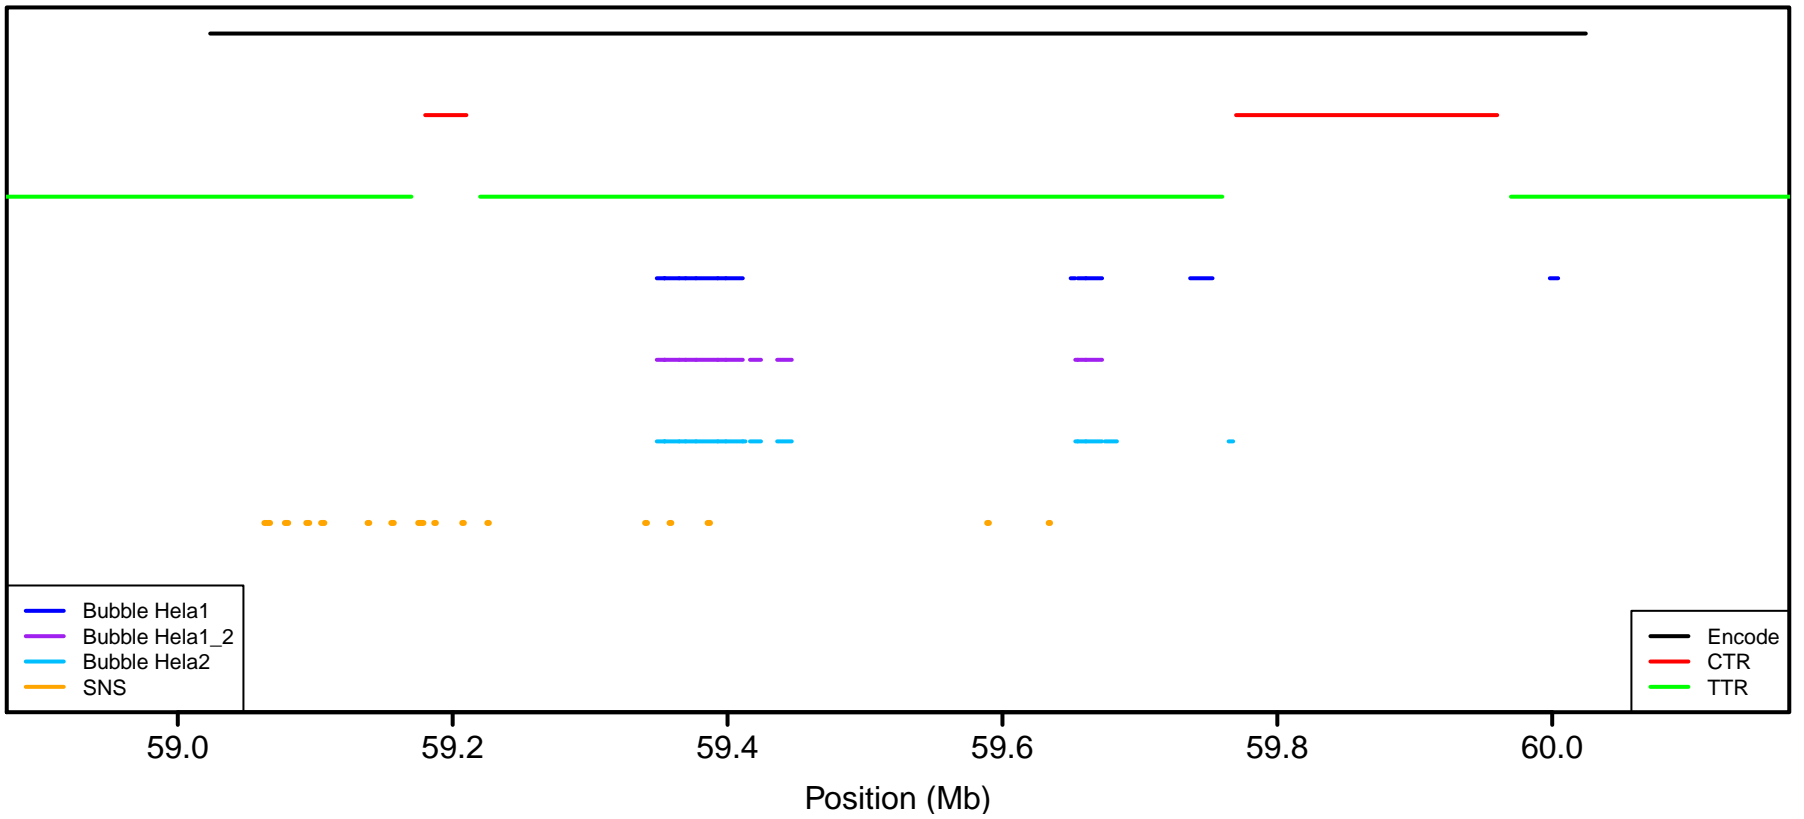

Timing of HeLa

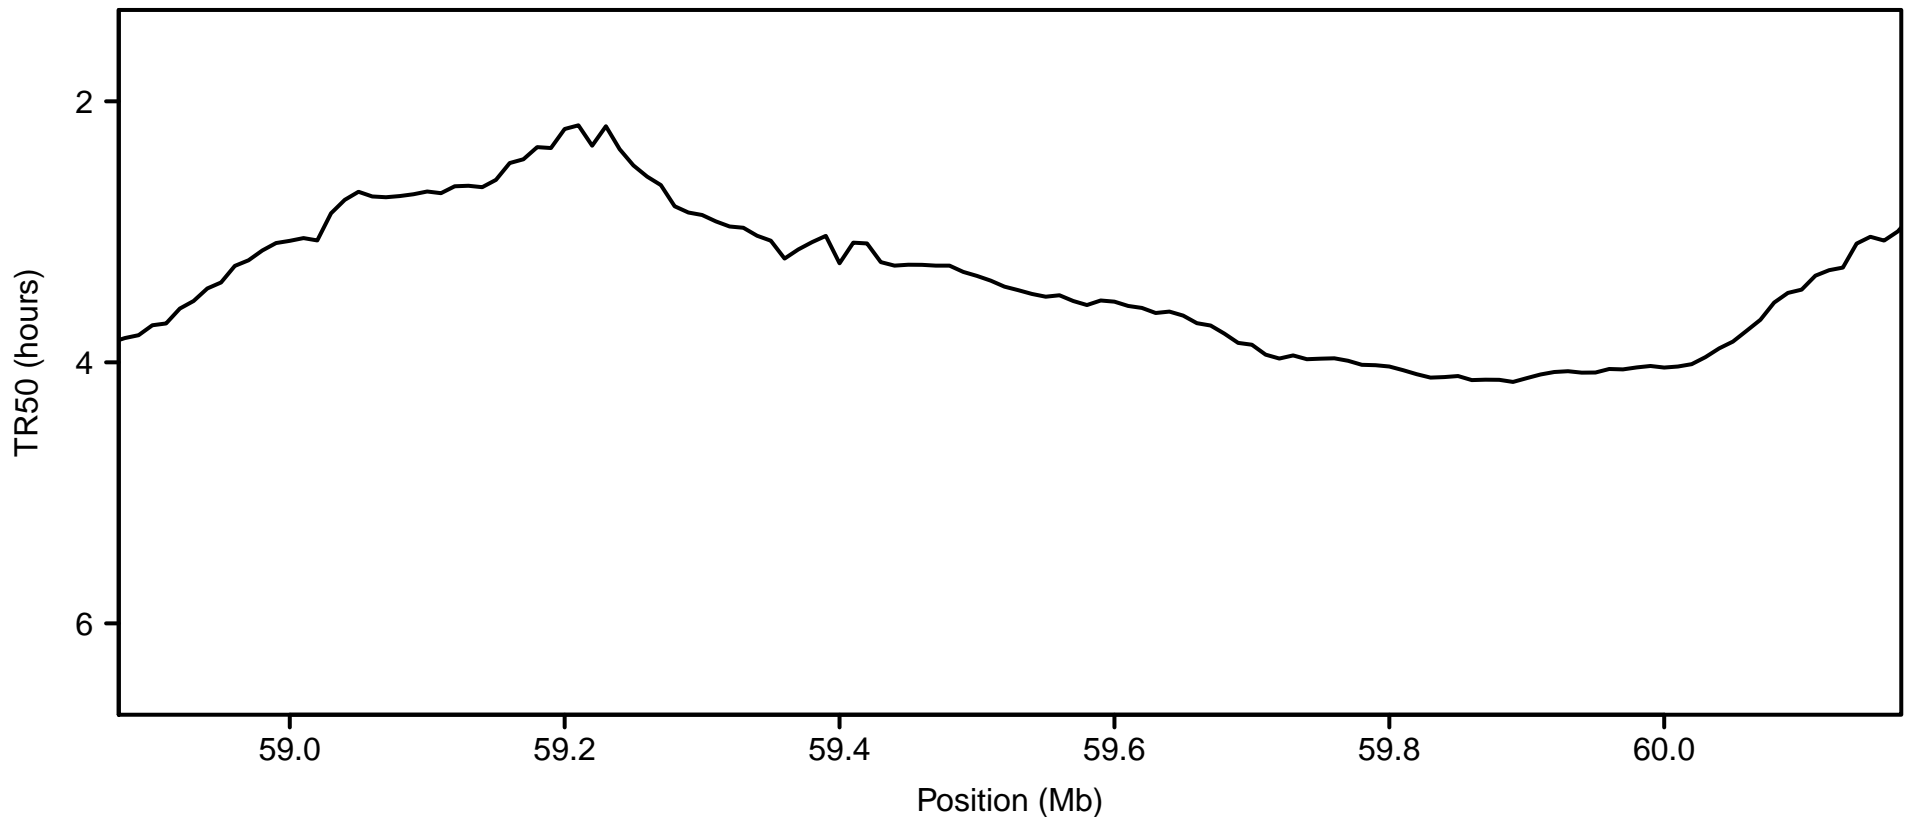

Apparent replication speed

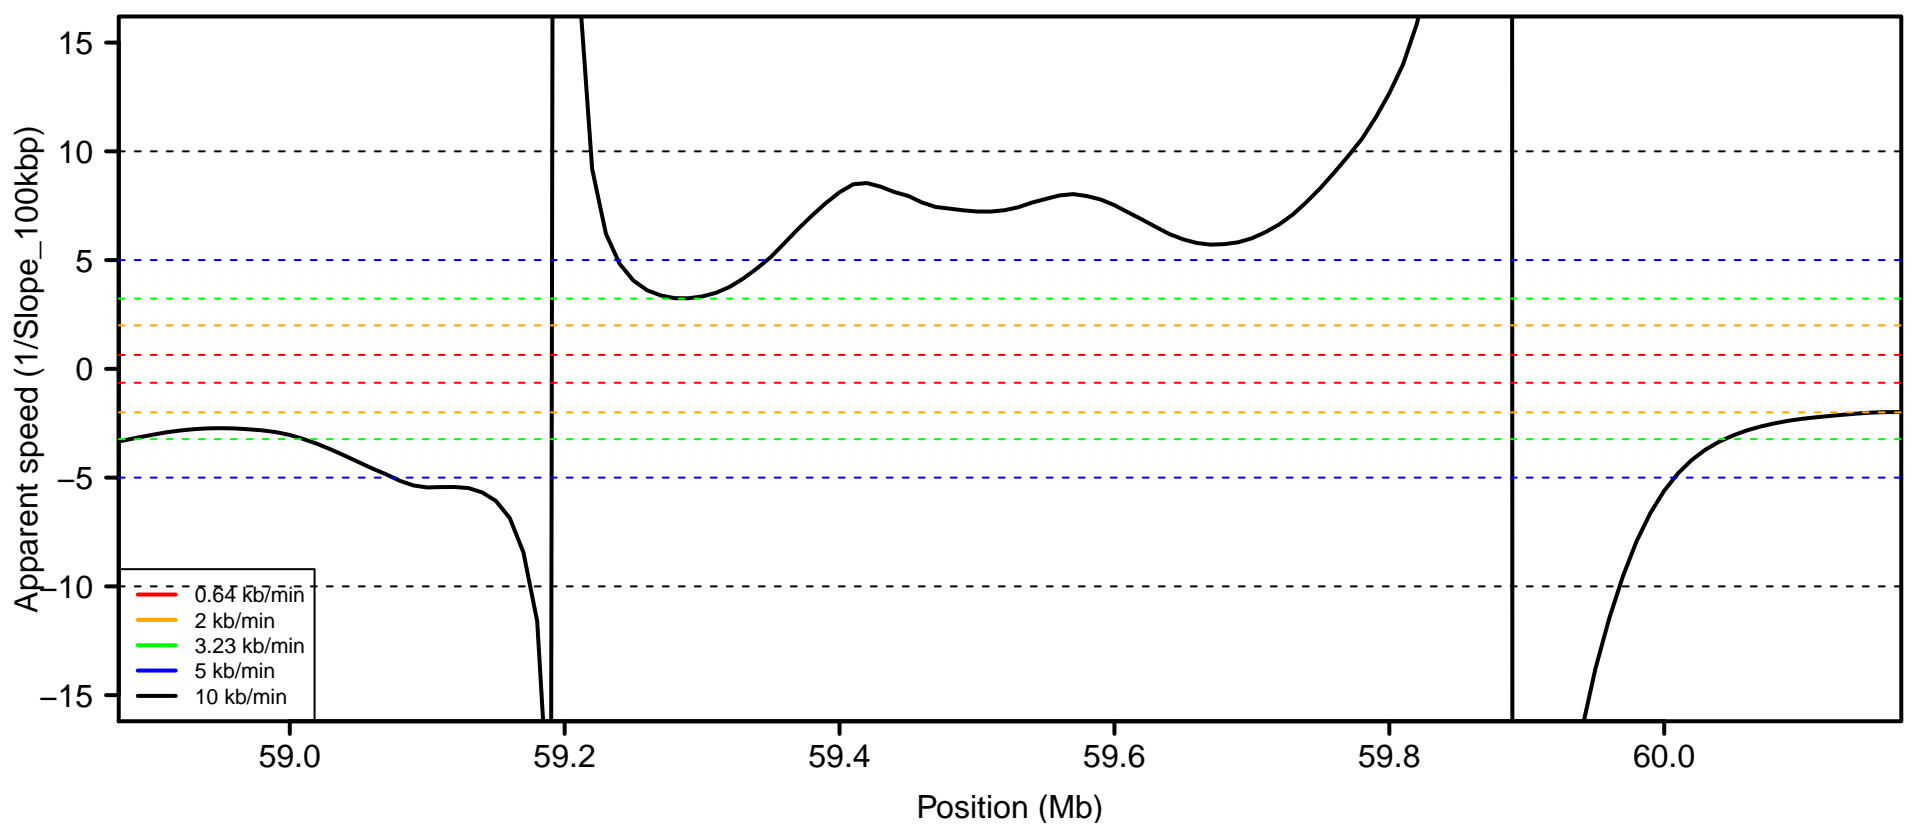

# Replication Timing Vs Encode Origin data, ENr333 (chr20:33304928\_33804928)

Annotation

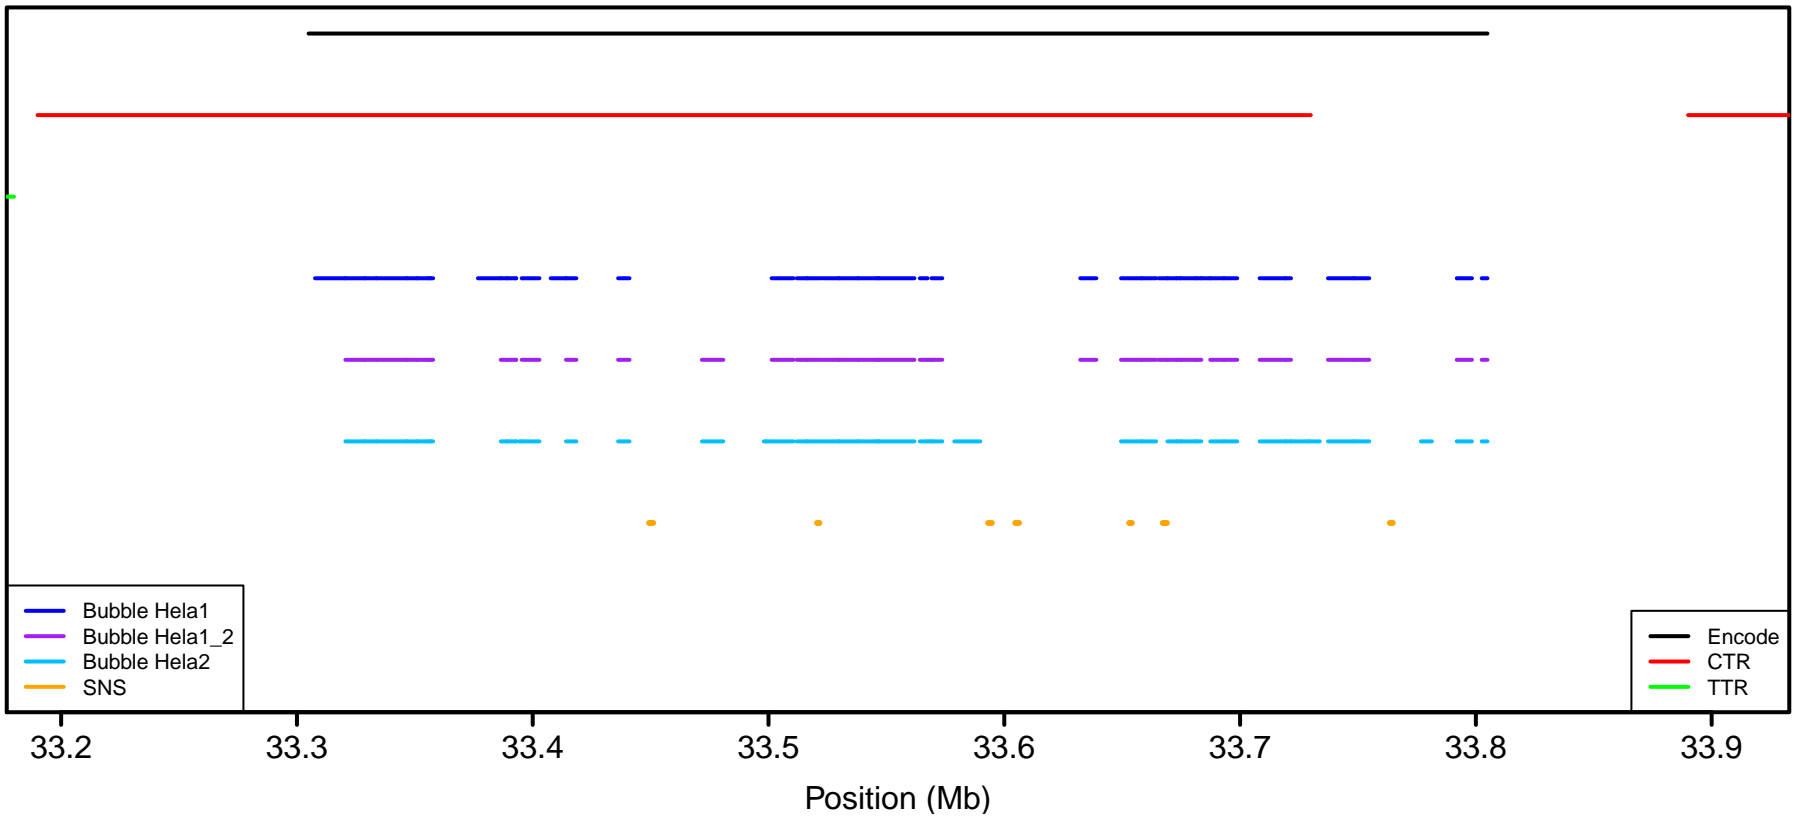

Timing of Hela

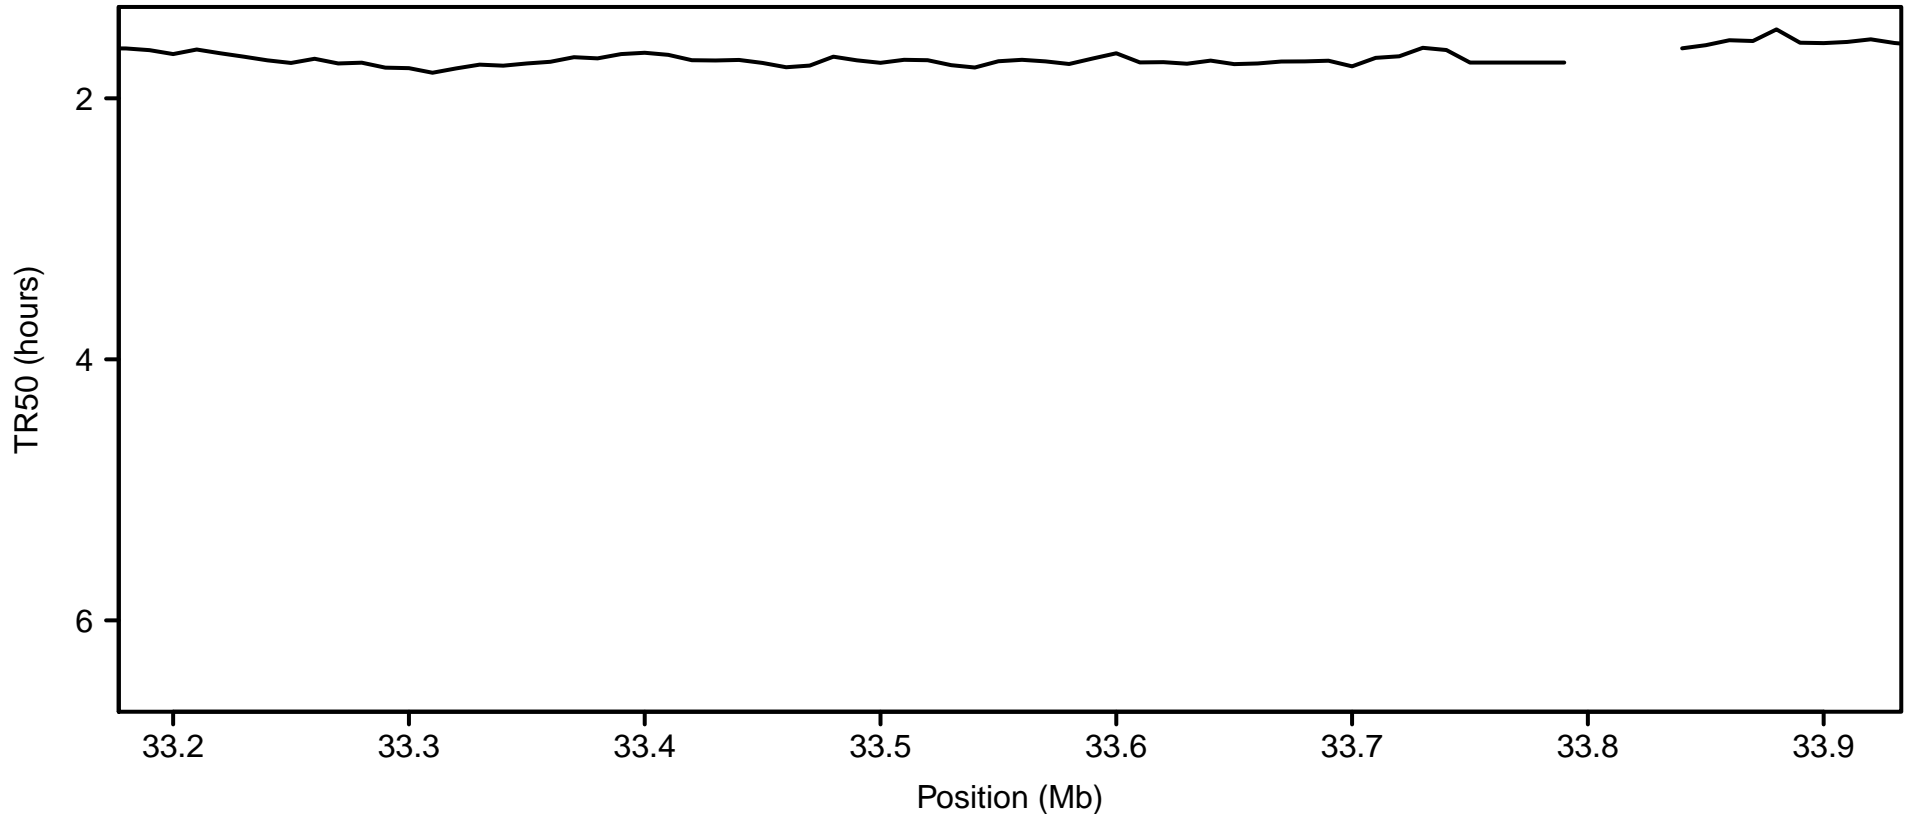

Apparent replication speed

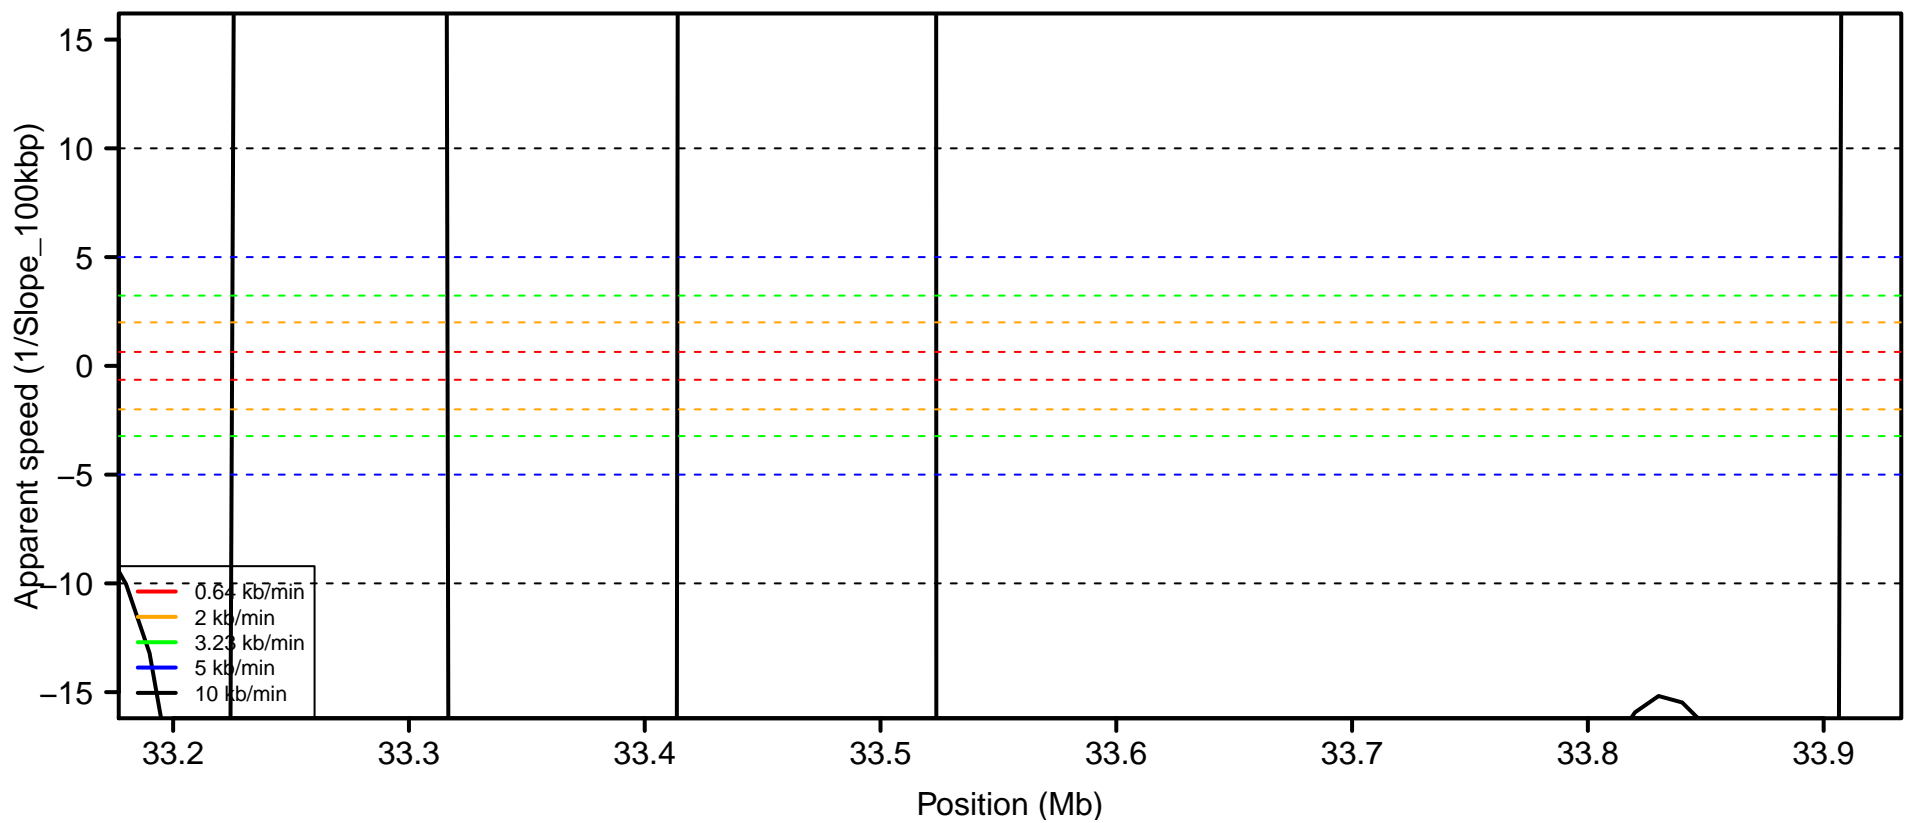

# Replication Timing Vs Encode Origin data, ENm005 (chr21:32668236\_34364221)

Annotation

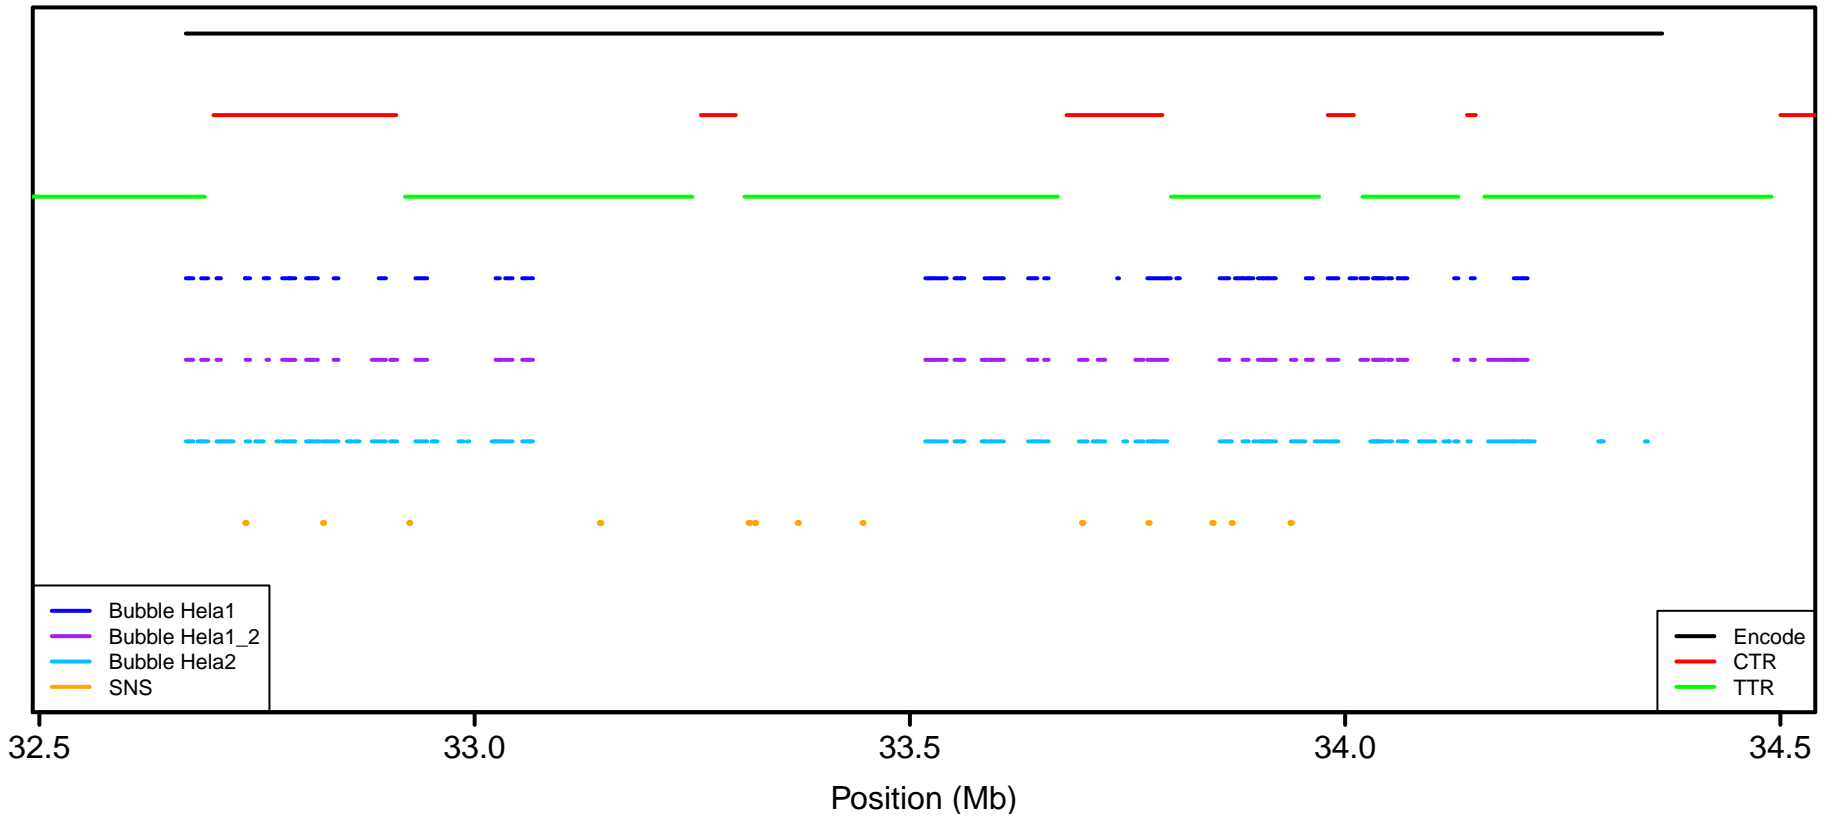

Timing of HeLa

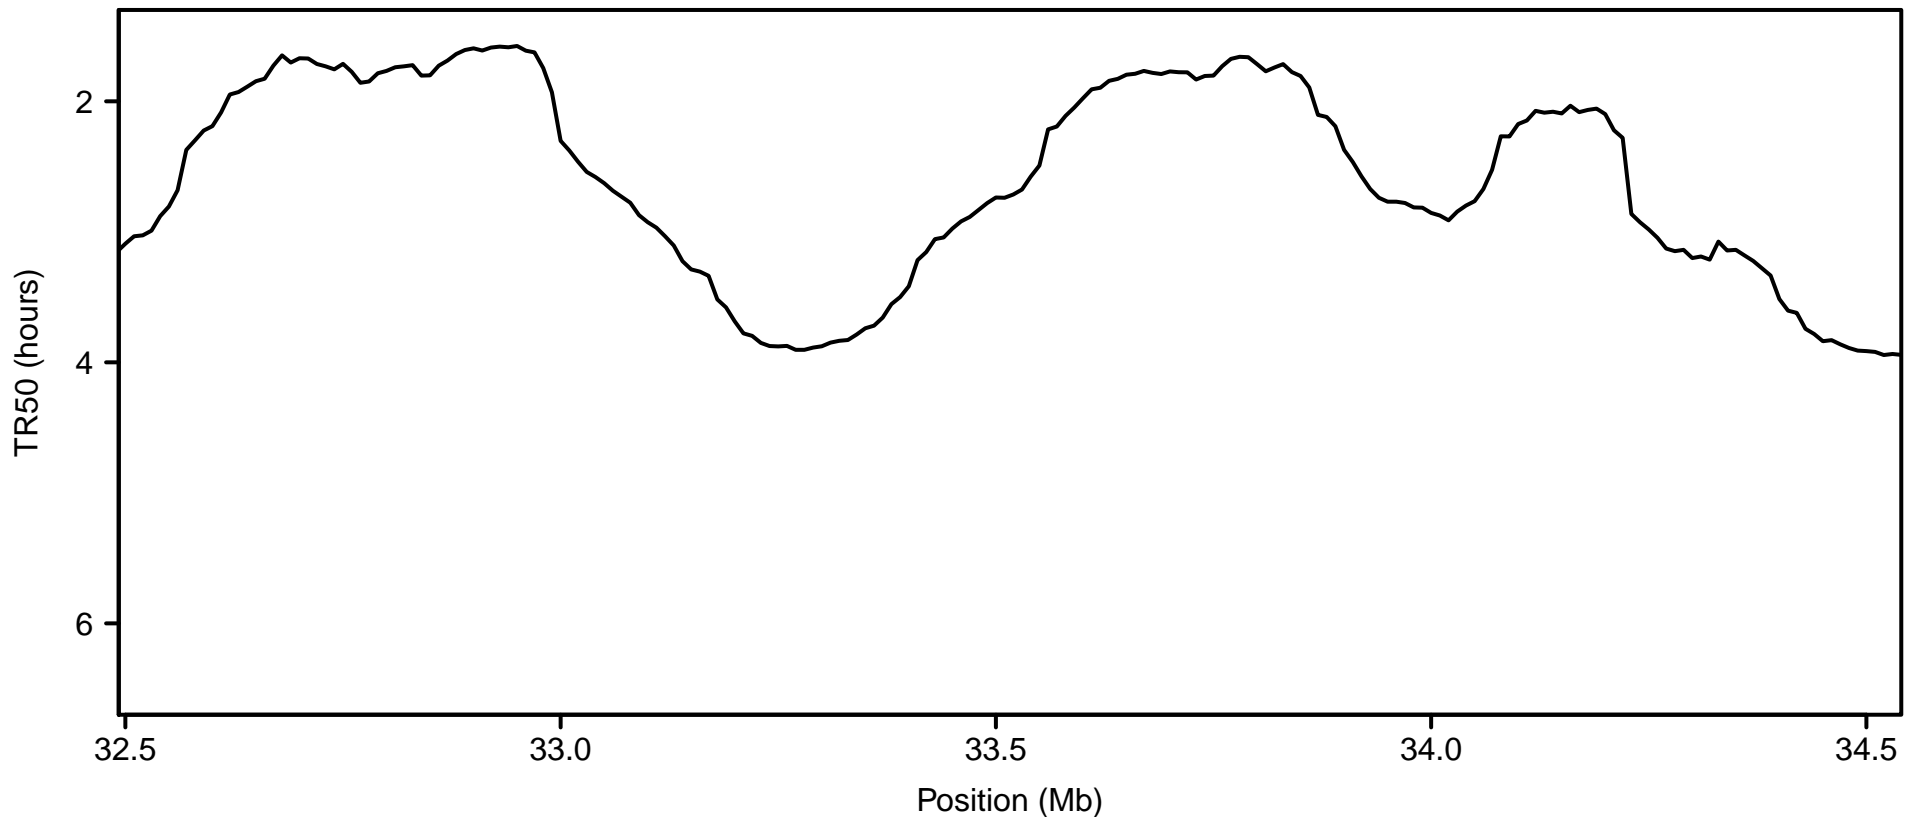

Apparent replication speed

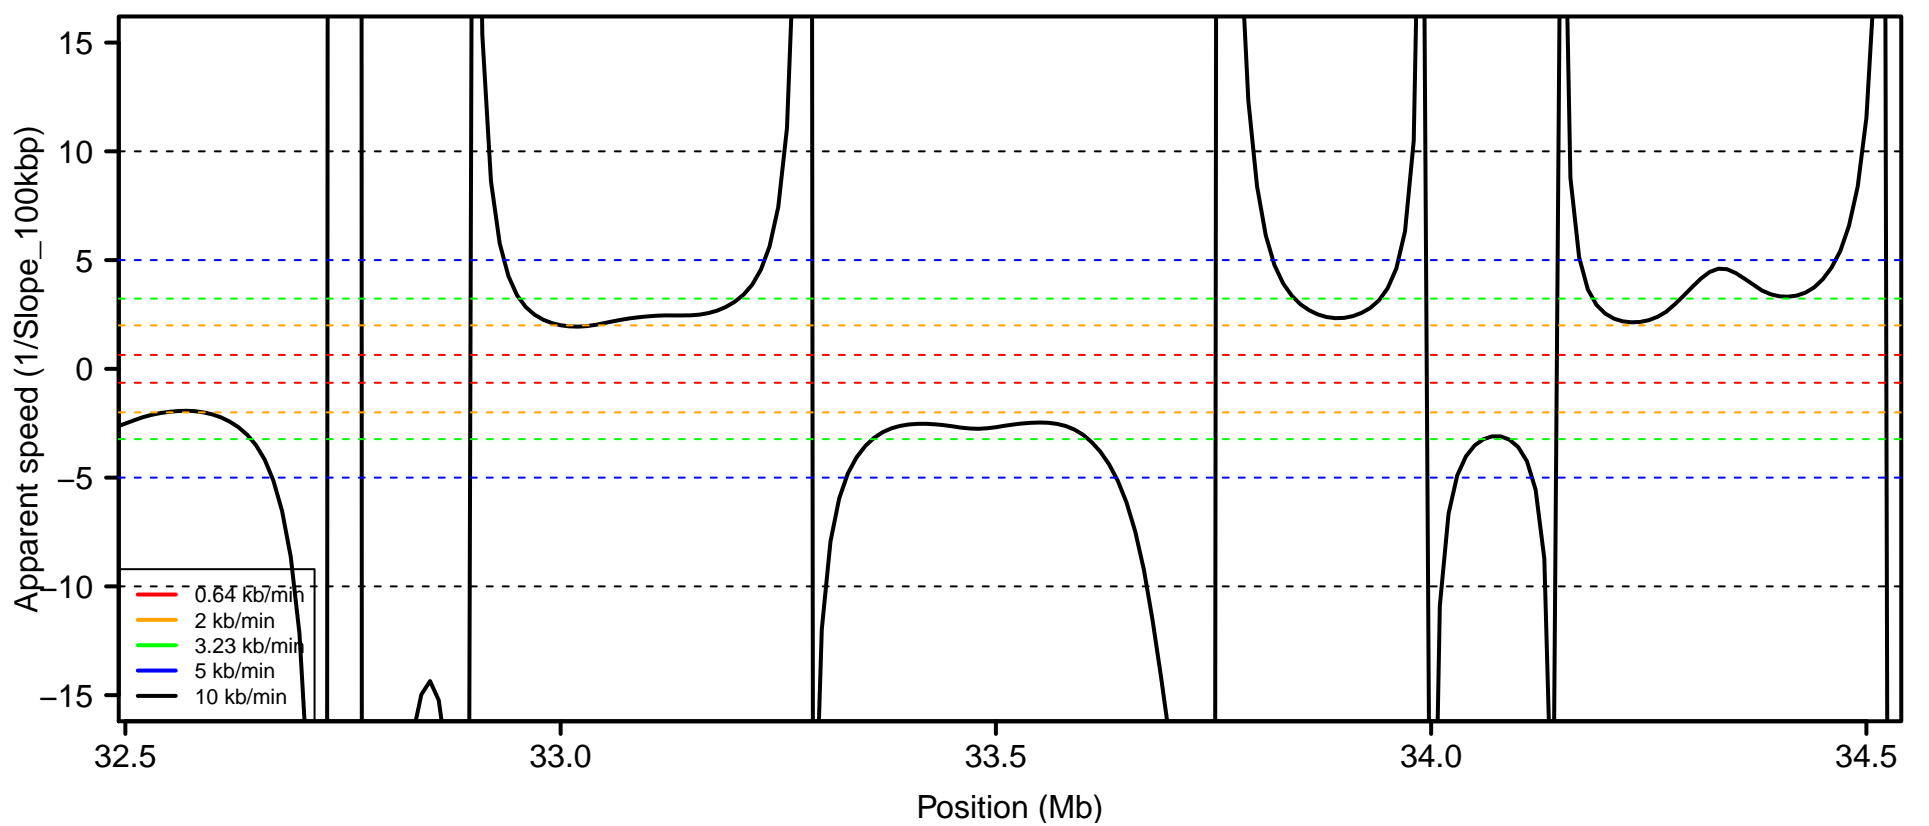



# Replication Timing Vs Encode Origin data, ENr133 (chr21:39244466\_39744466)

Annotation

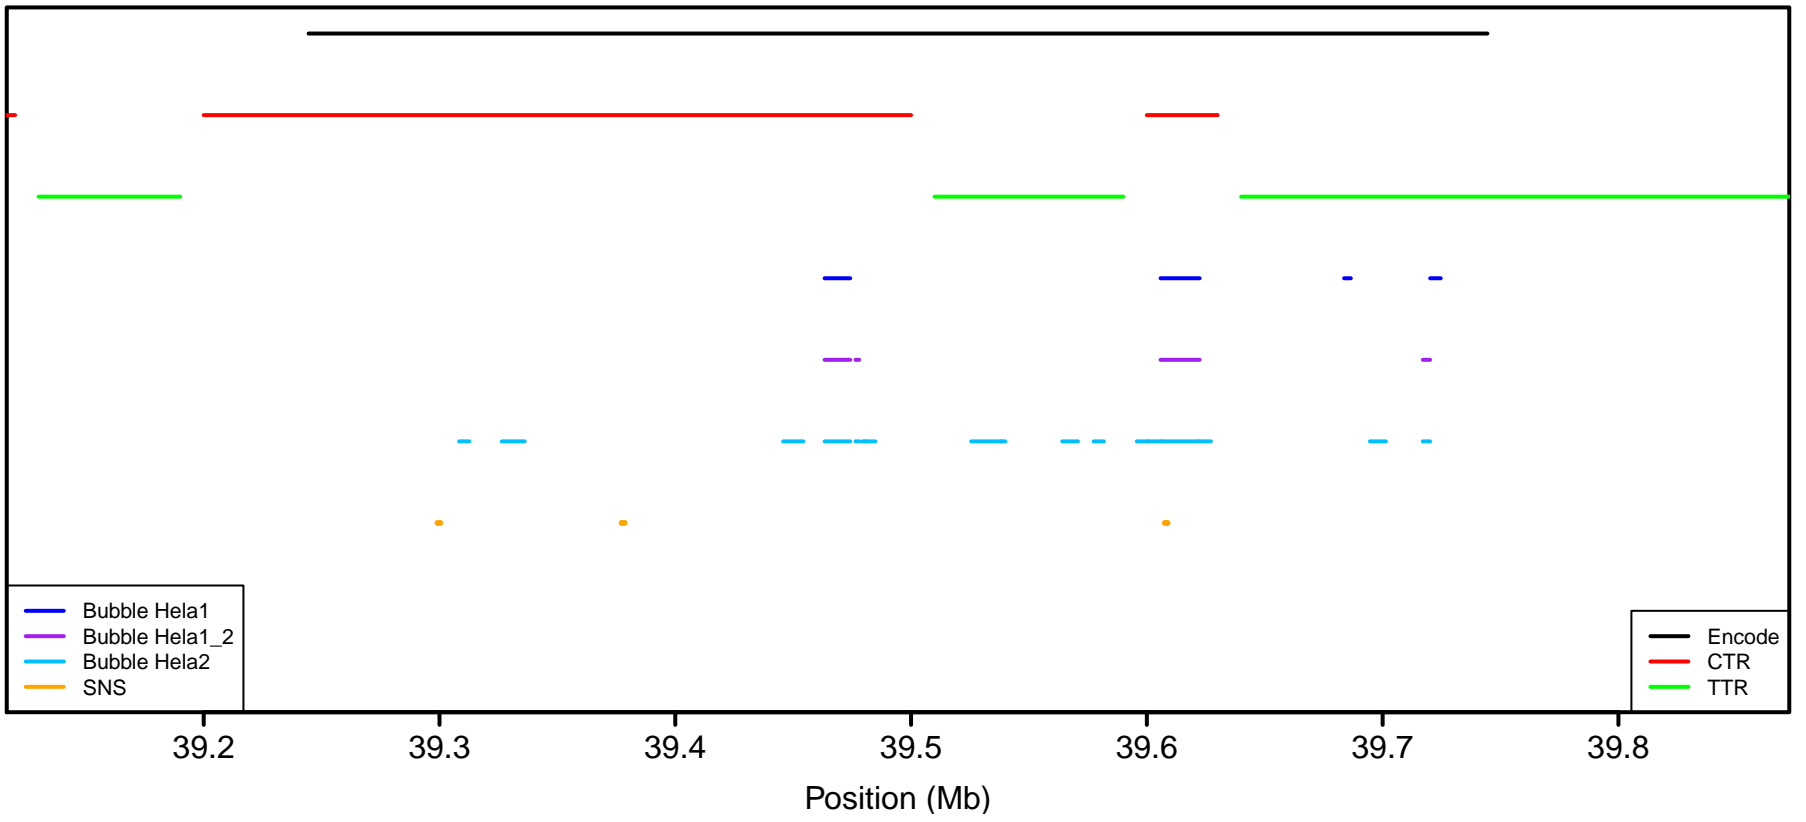

Timing of Hela

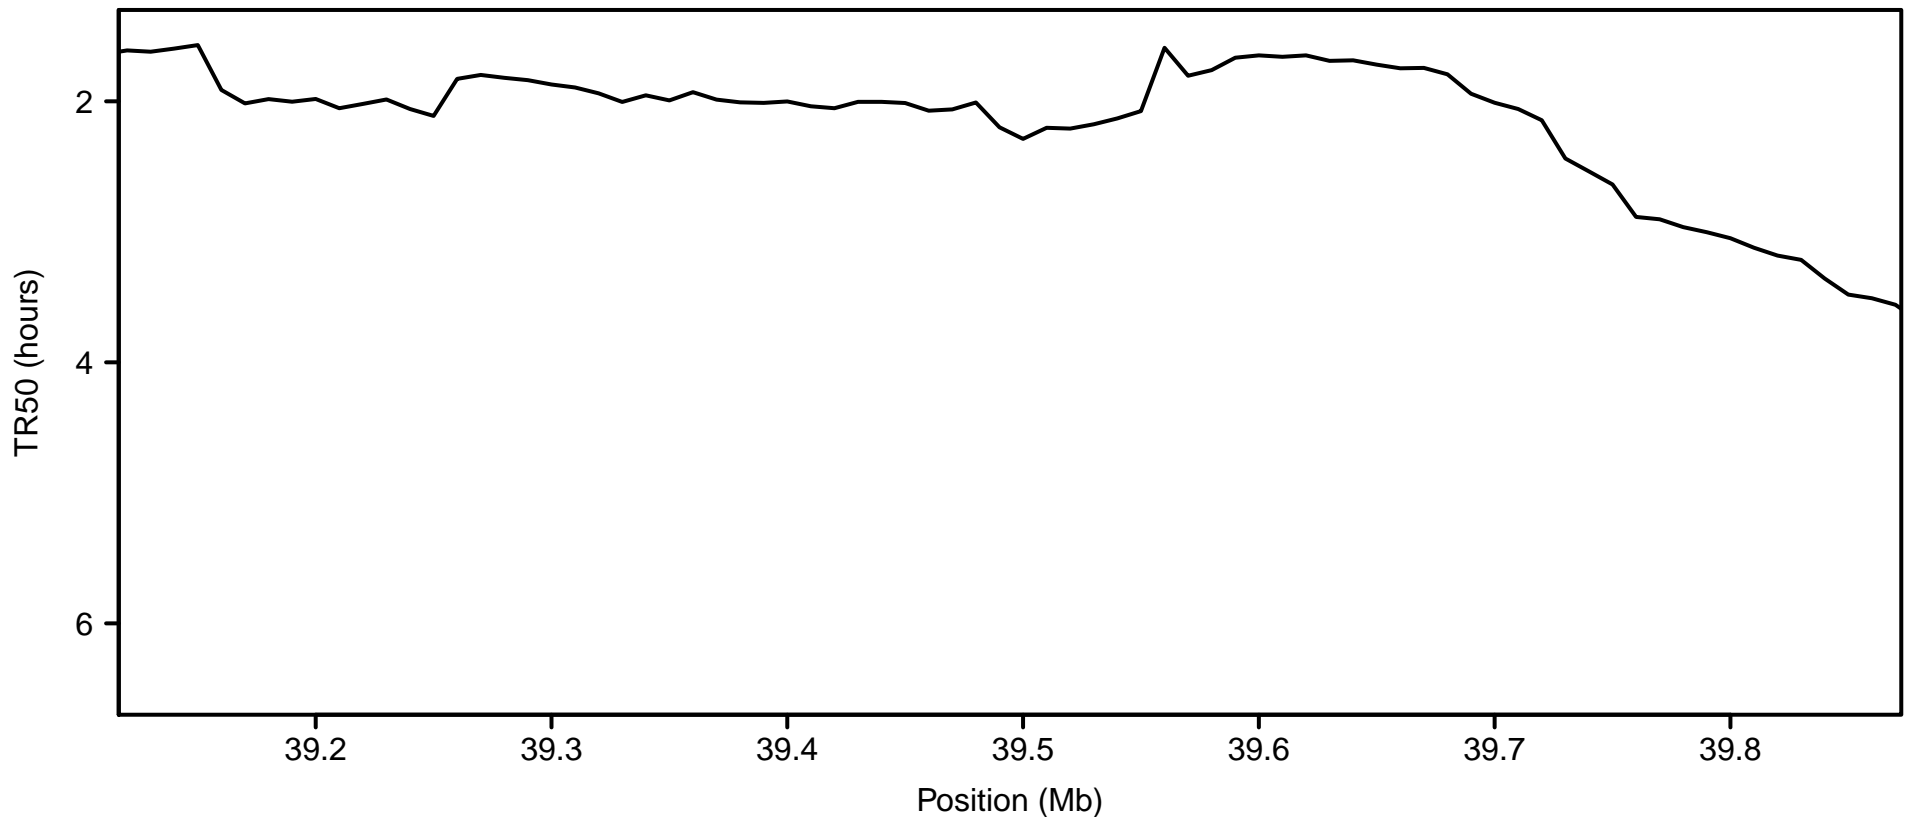

Apparent replication speed

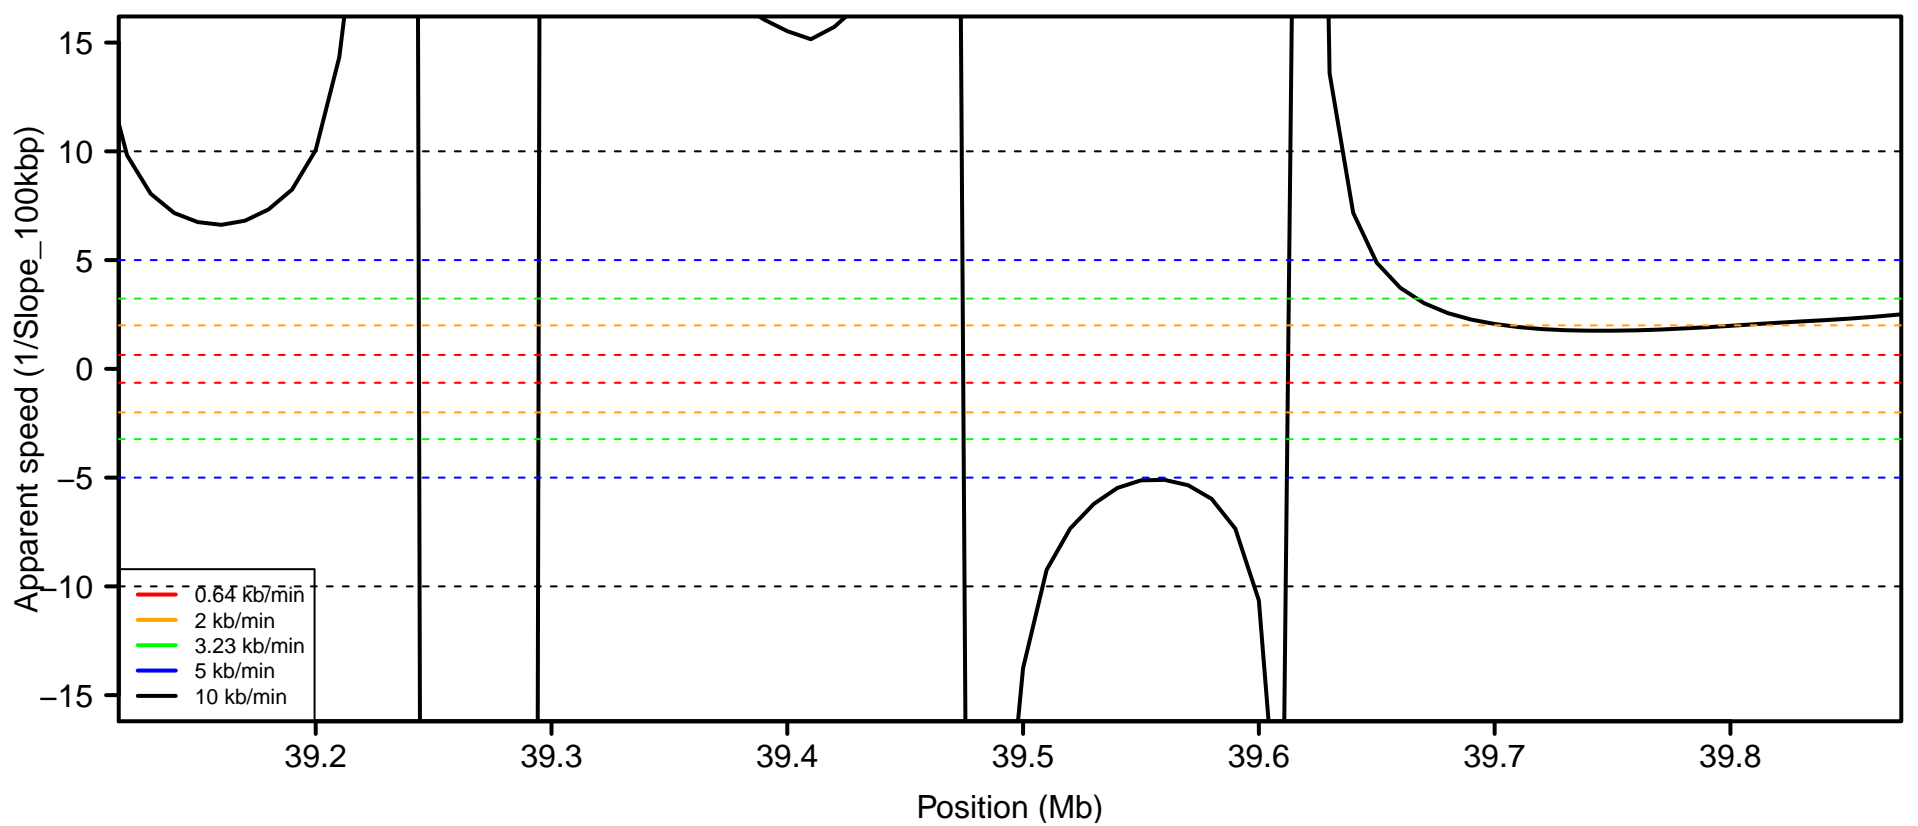

# Replication Timing Vs Encode Origin data, ENm004 (chr22:30133953\_31833953)

Annotation

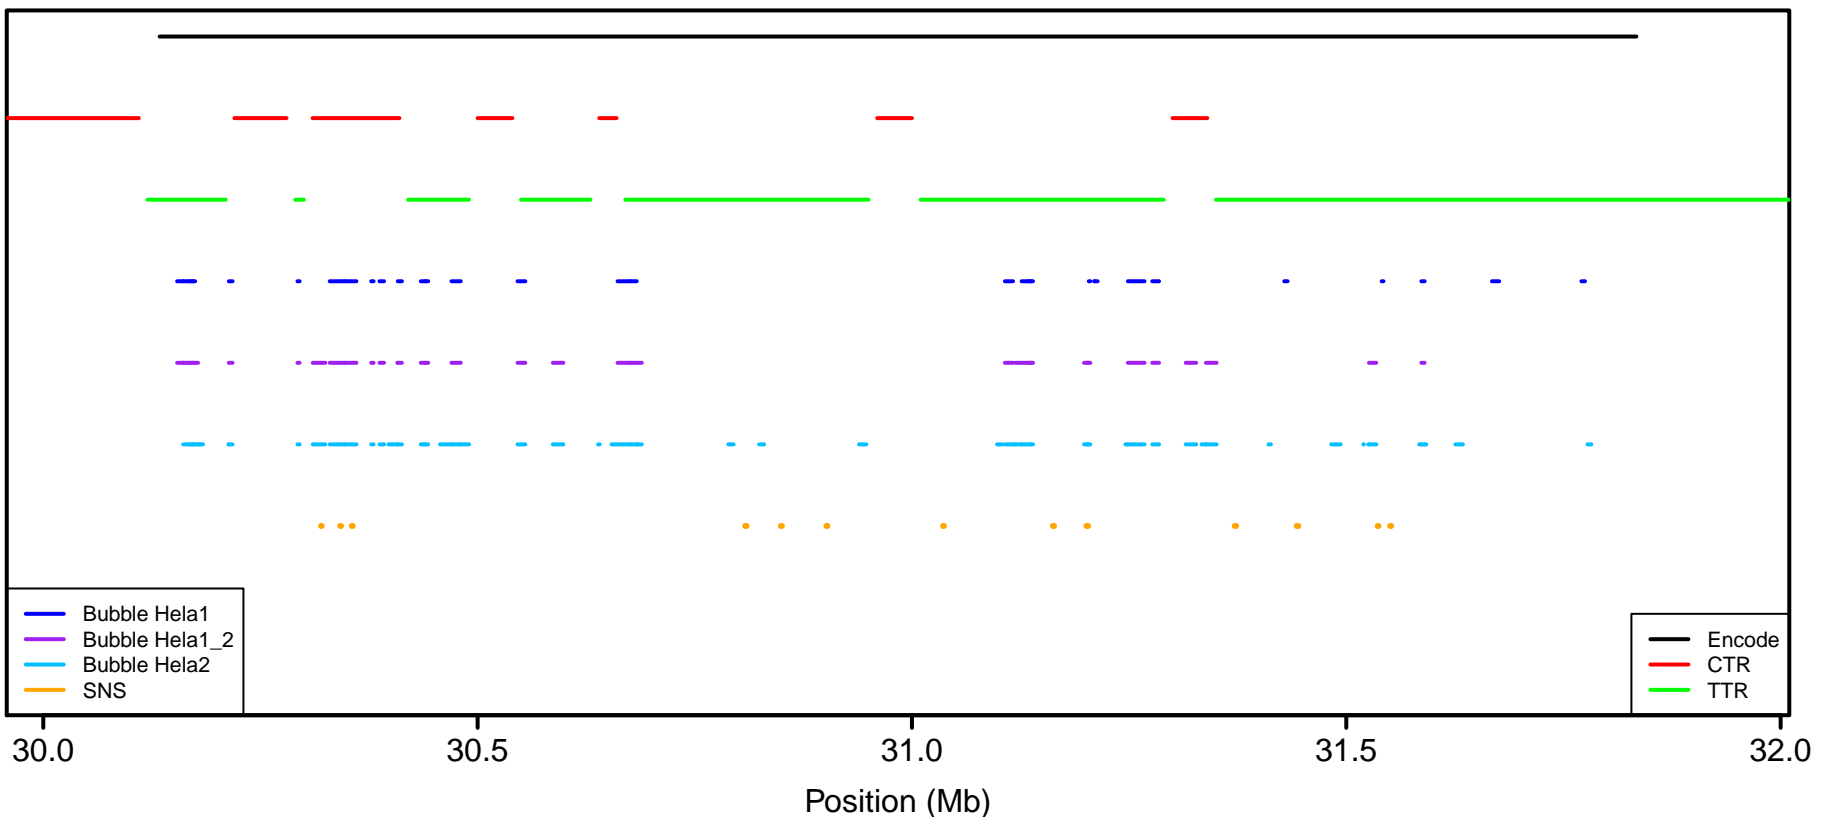

Timing of HeLa

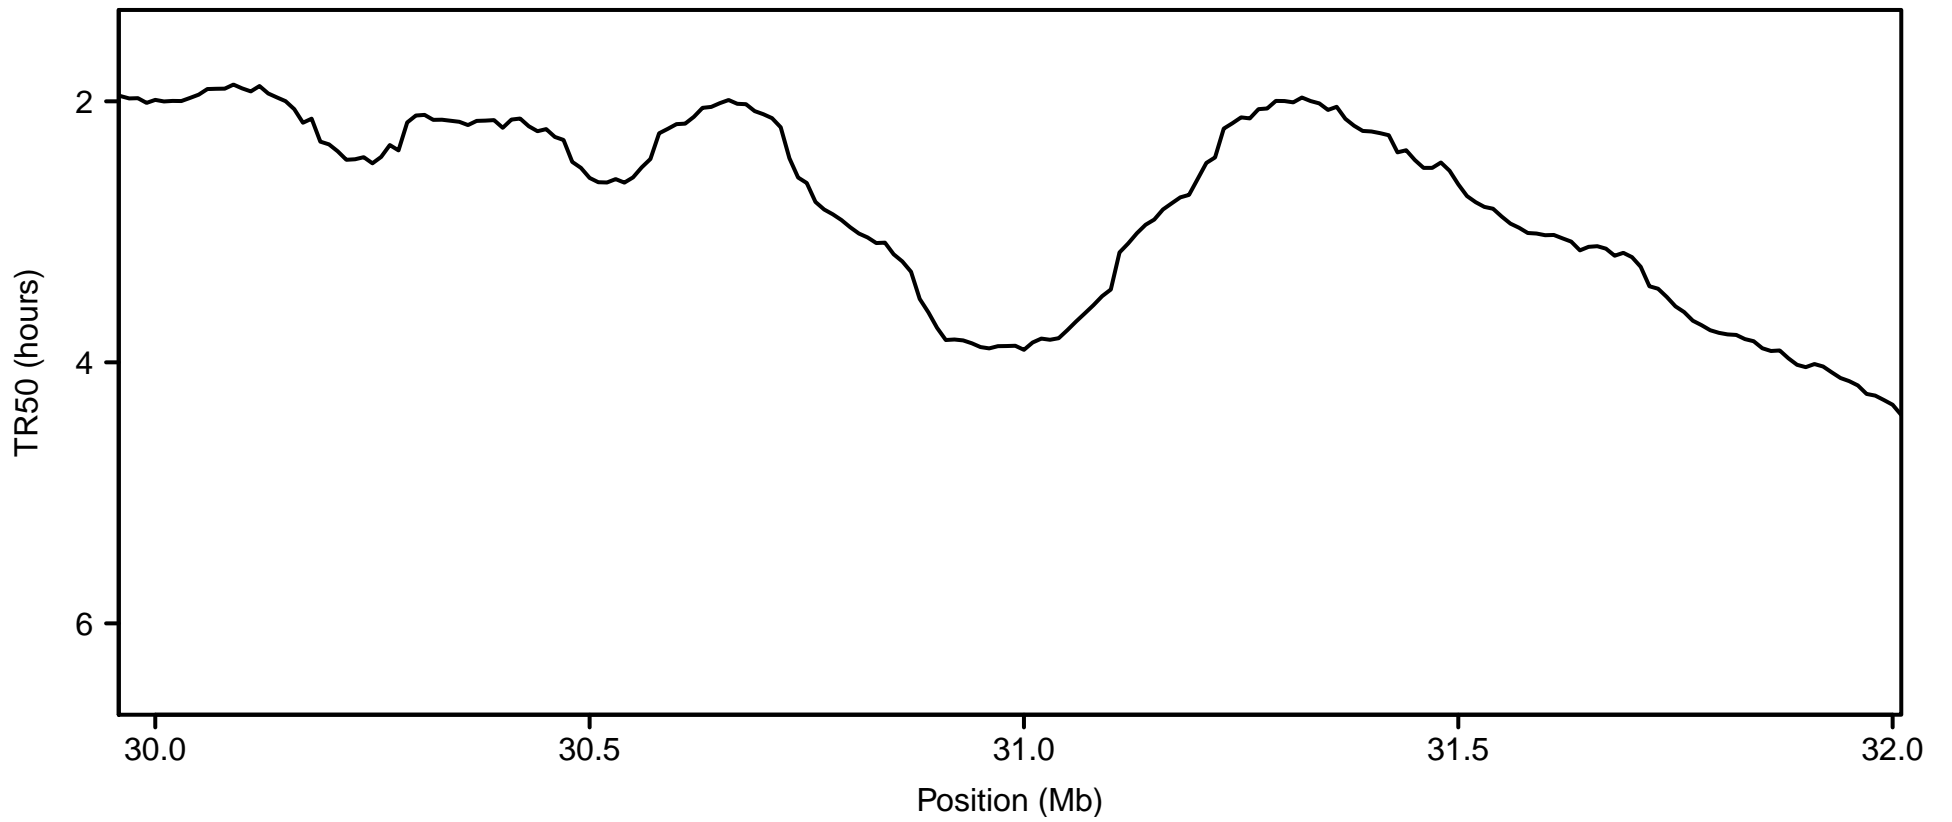

Apparent replication speed

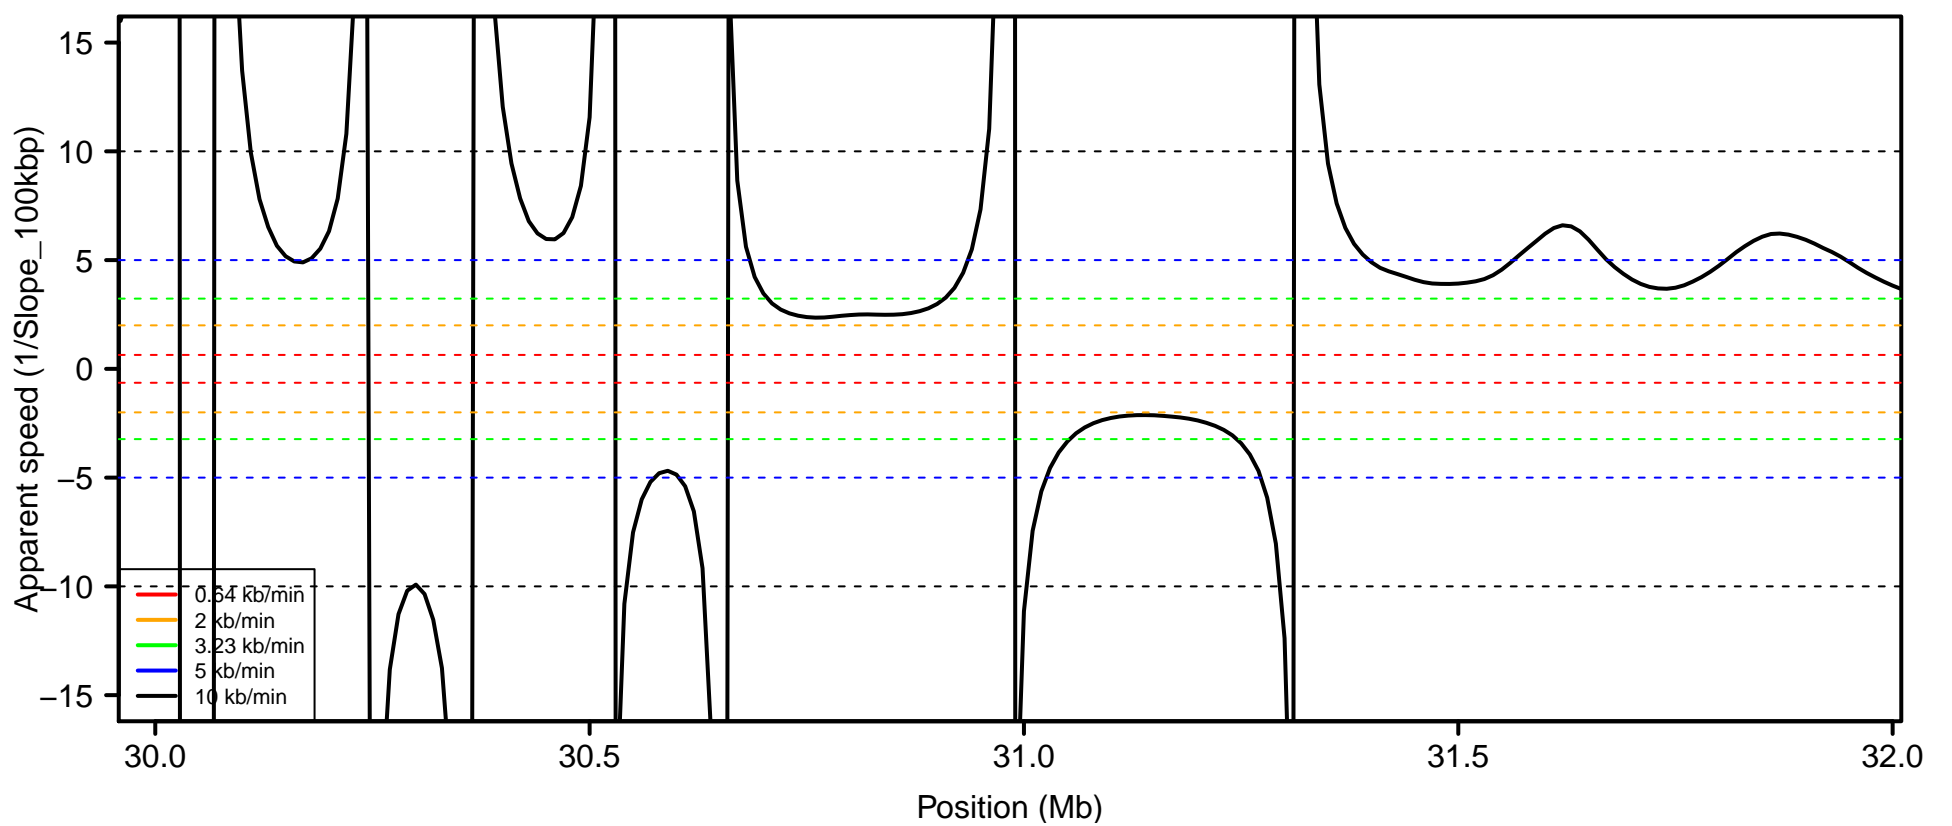

# Replication Timing Vs Encode Origin data, ENr324 (chrX:122609995\_123109995)

### Annotation

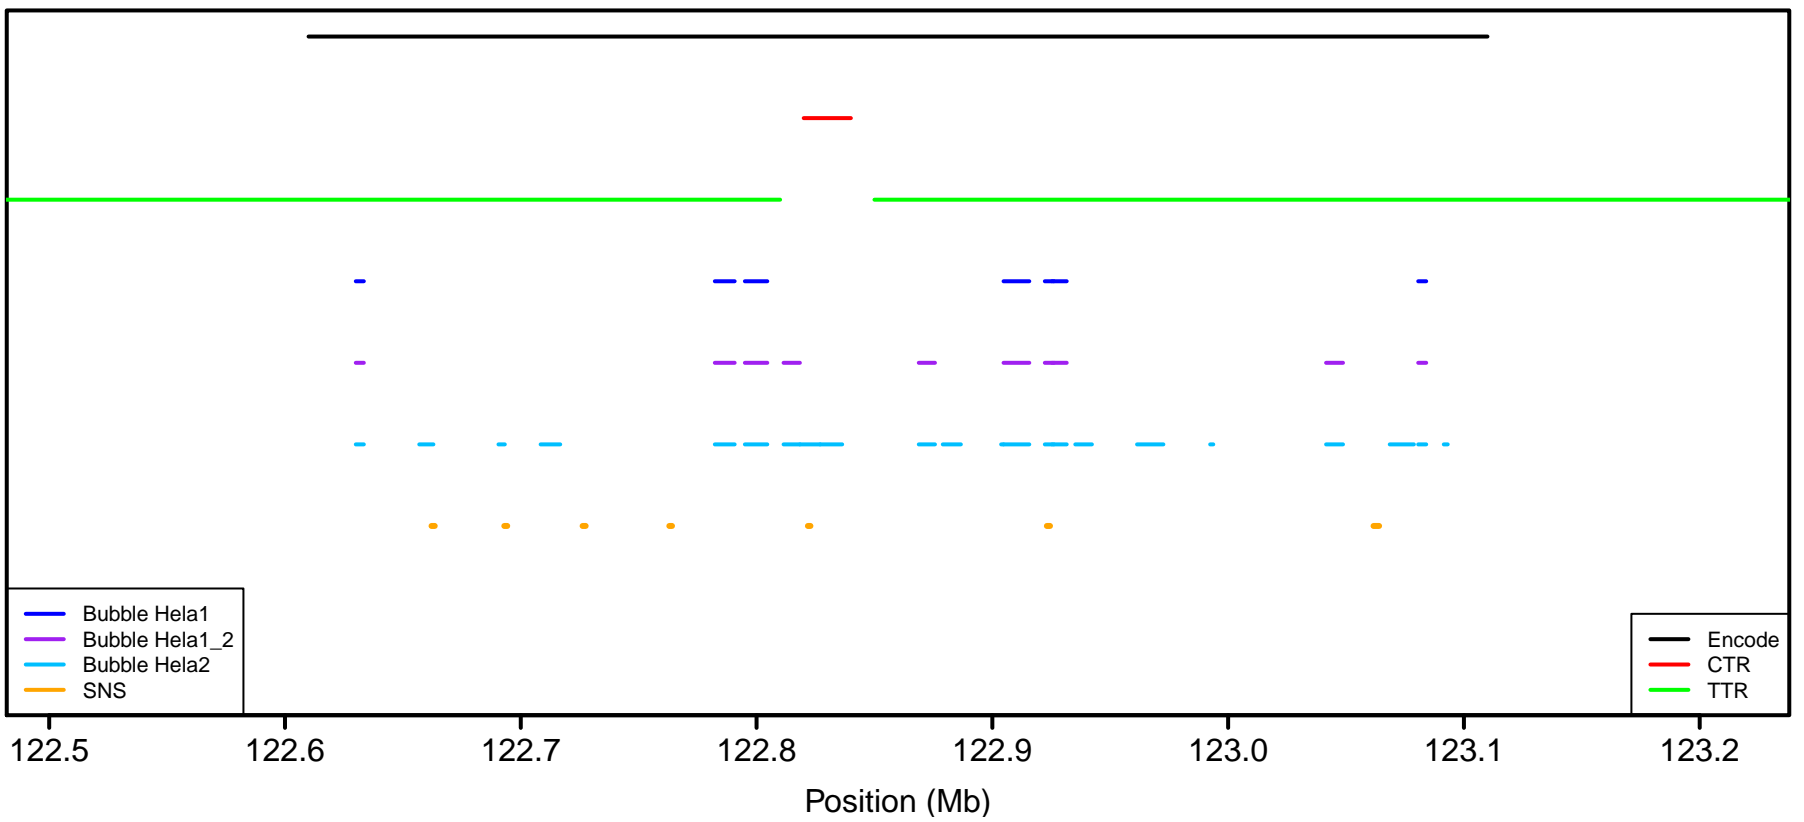

### Timing of HeLa

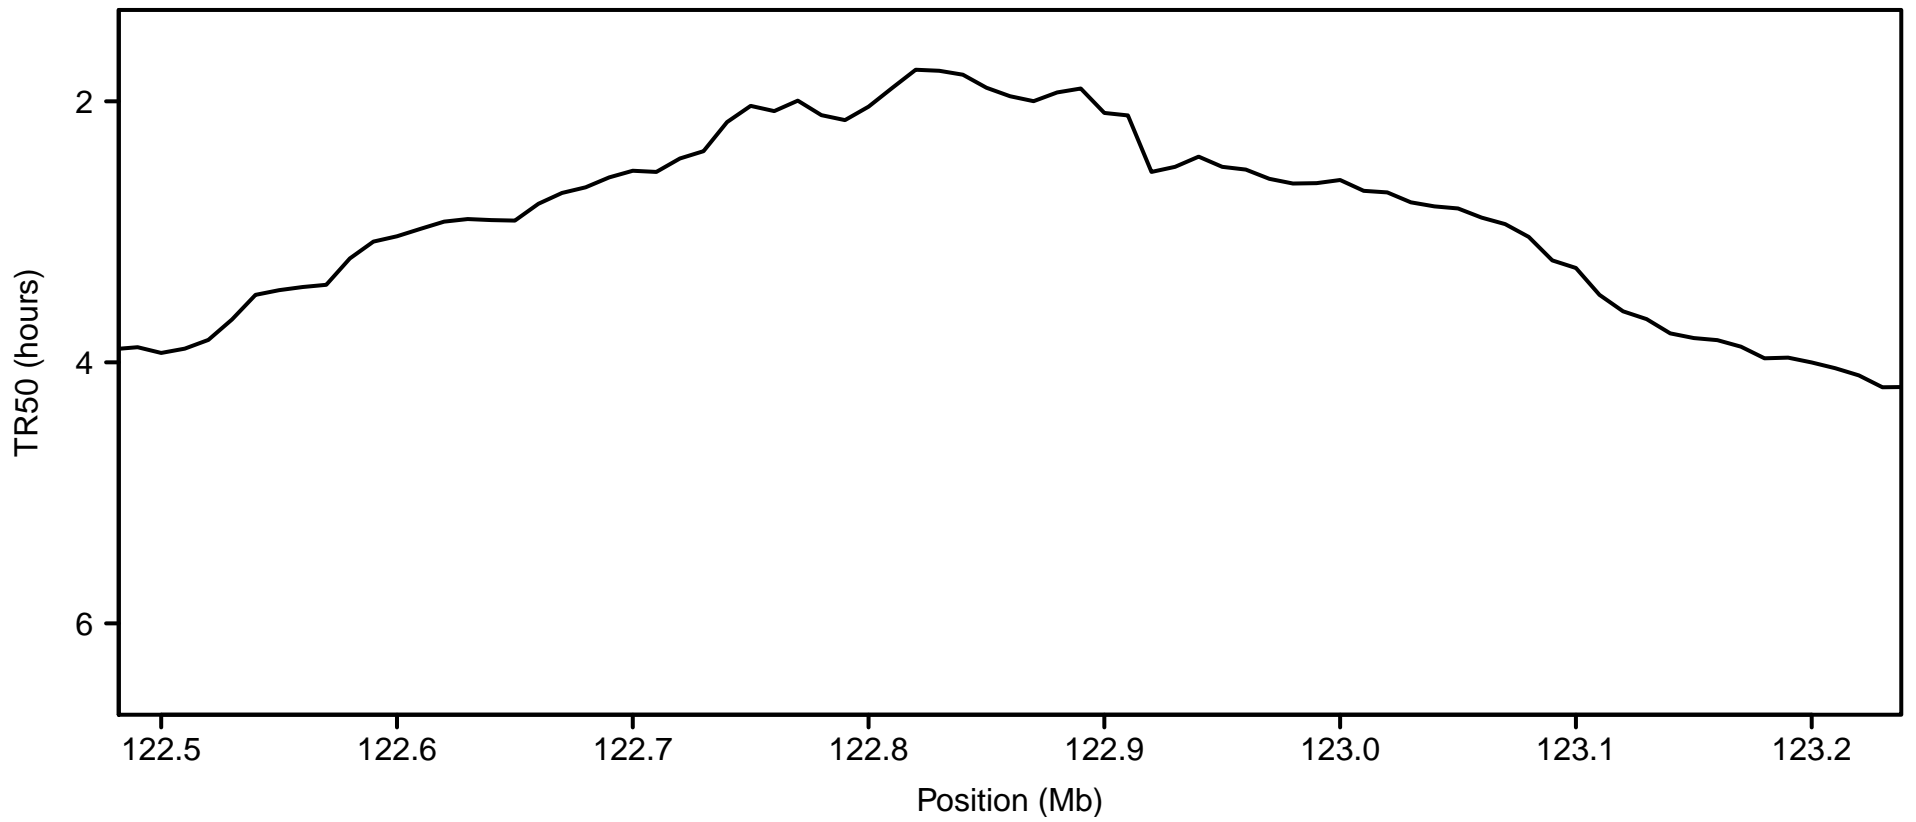

### Apparent replication speed

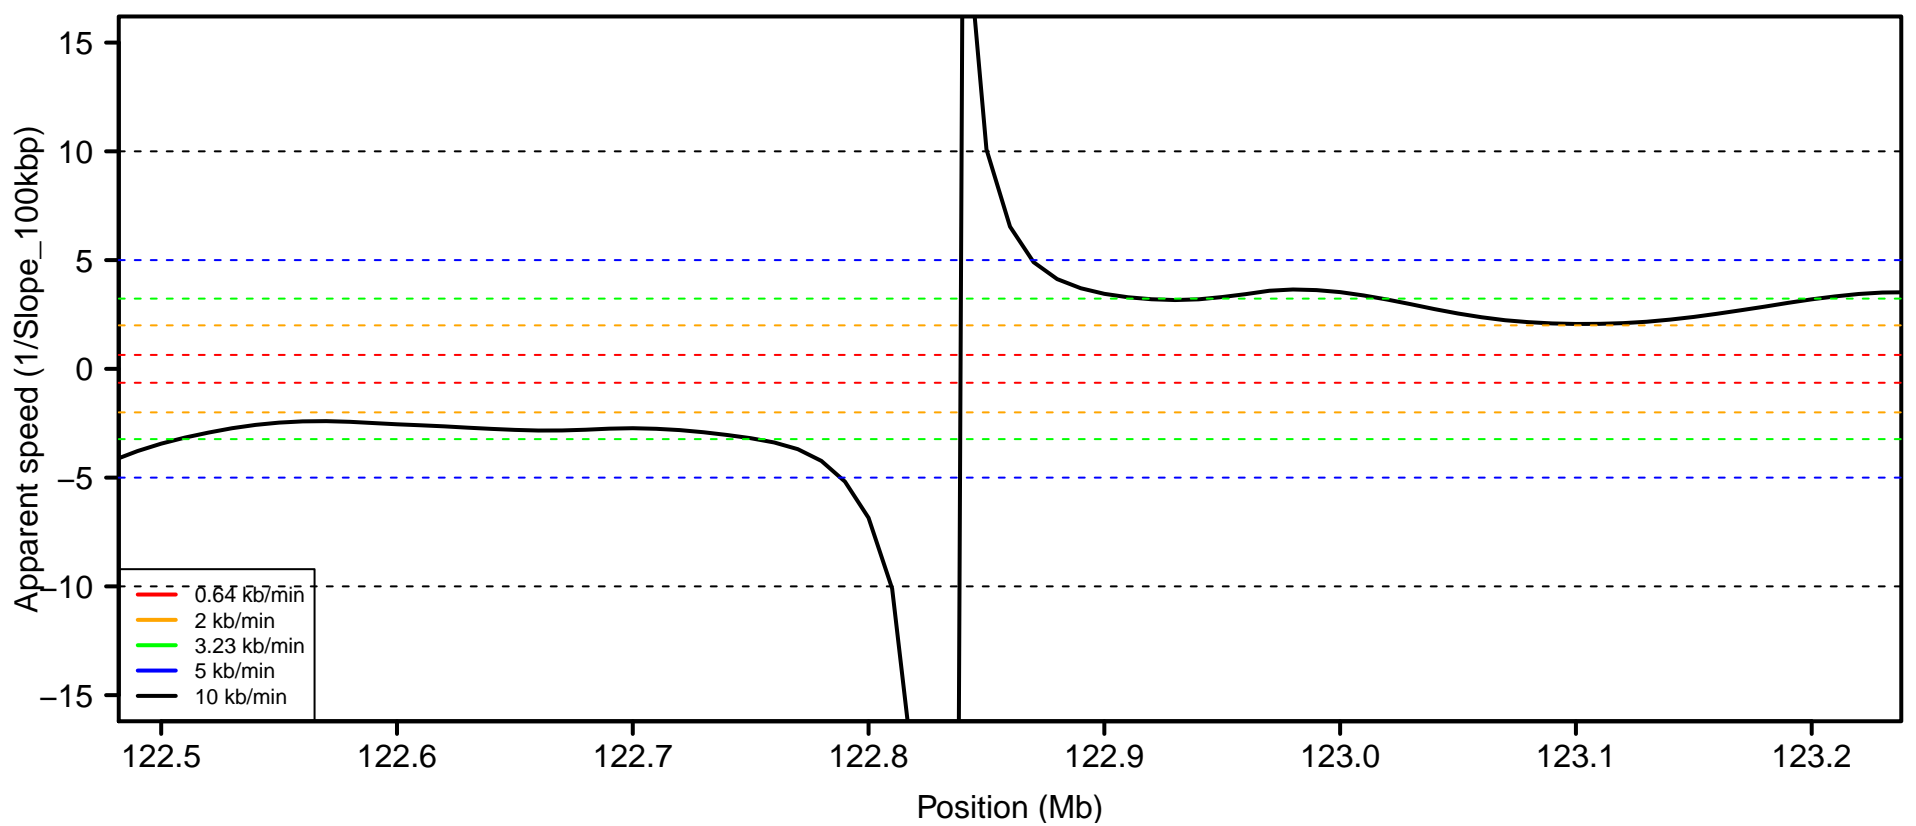

# Replication Timing Vs Encode Origin data, ENm006 (chrX:152767491\_154063081)

Annotation

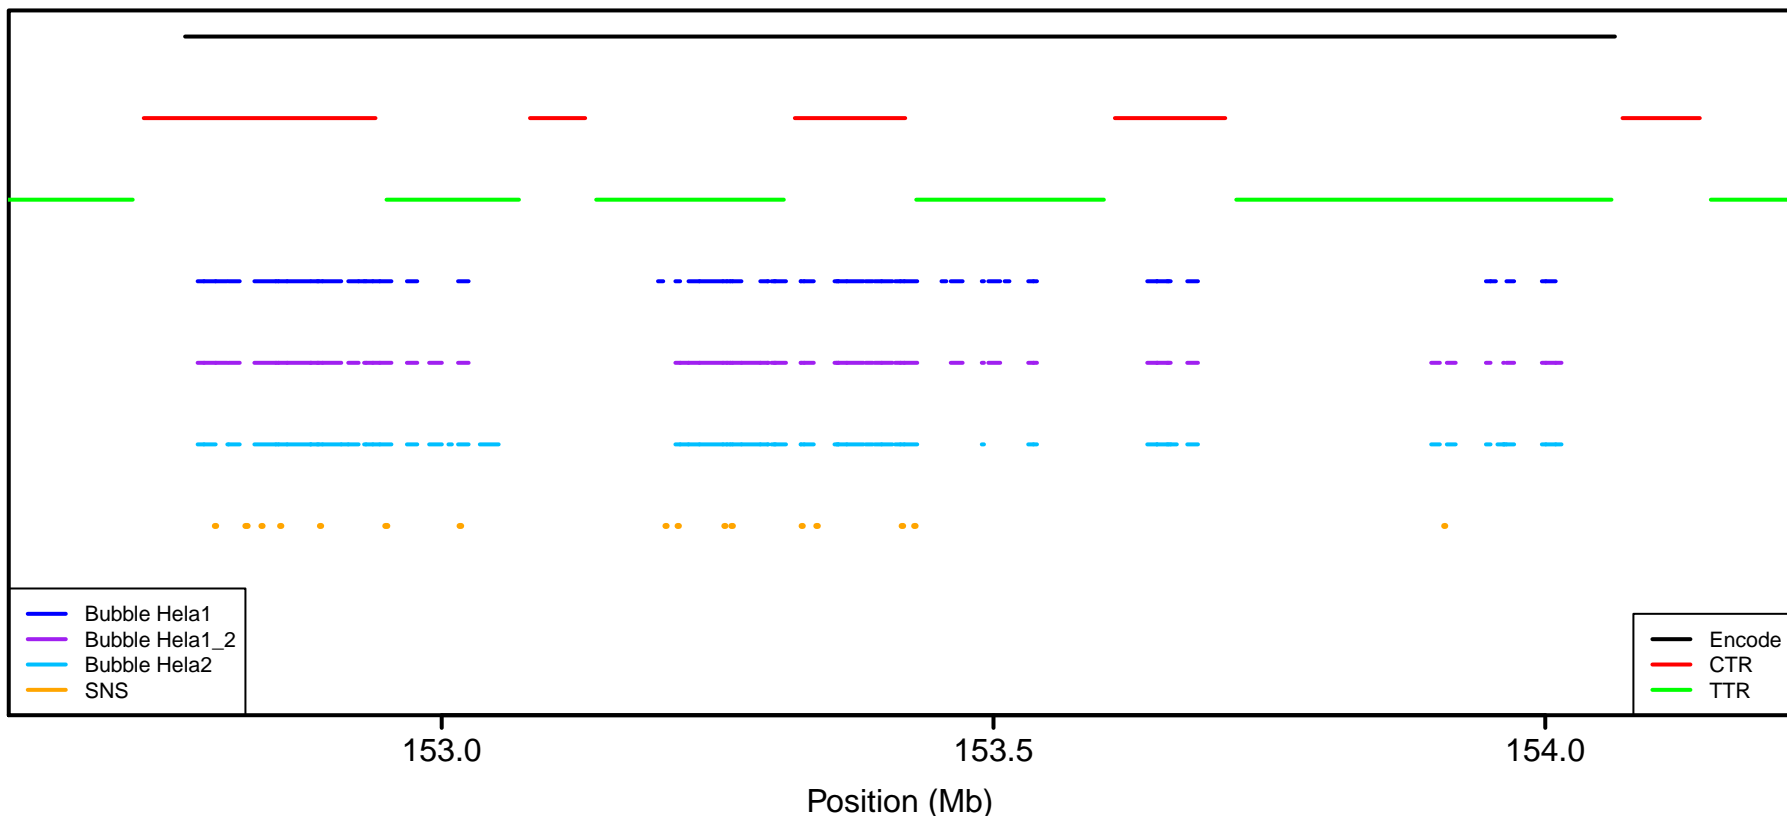

Timing of Hela

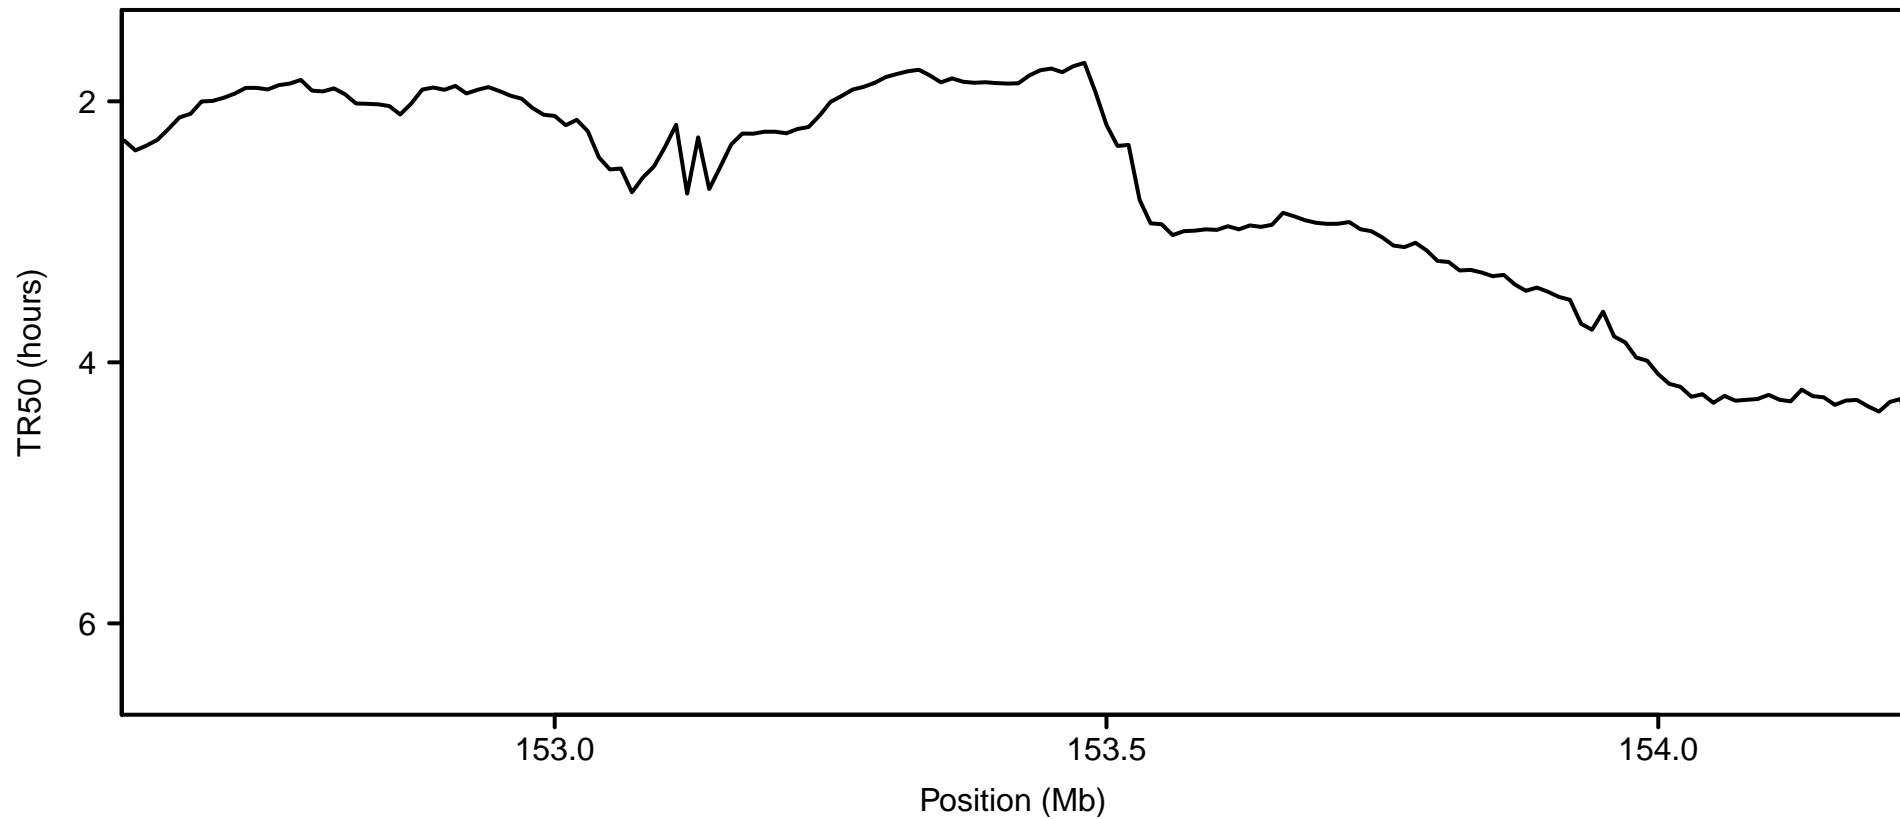

Apparent replication speed

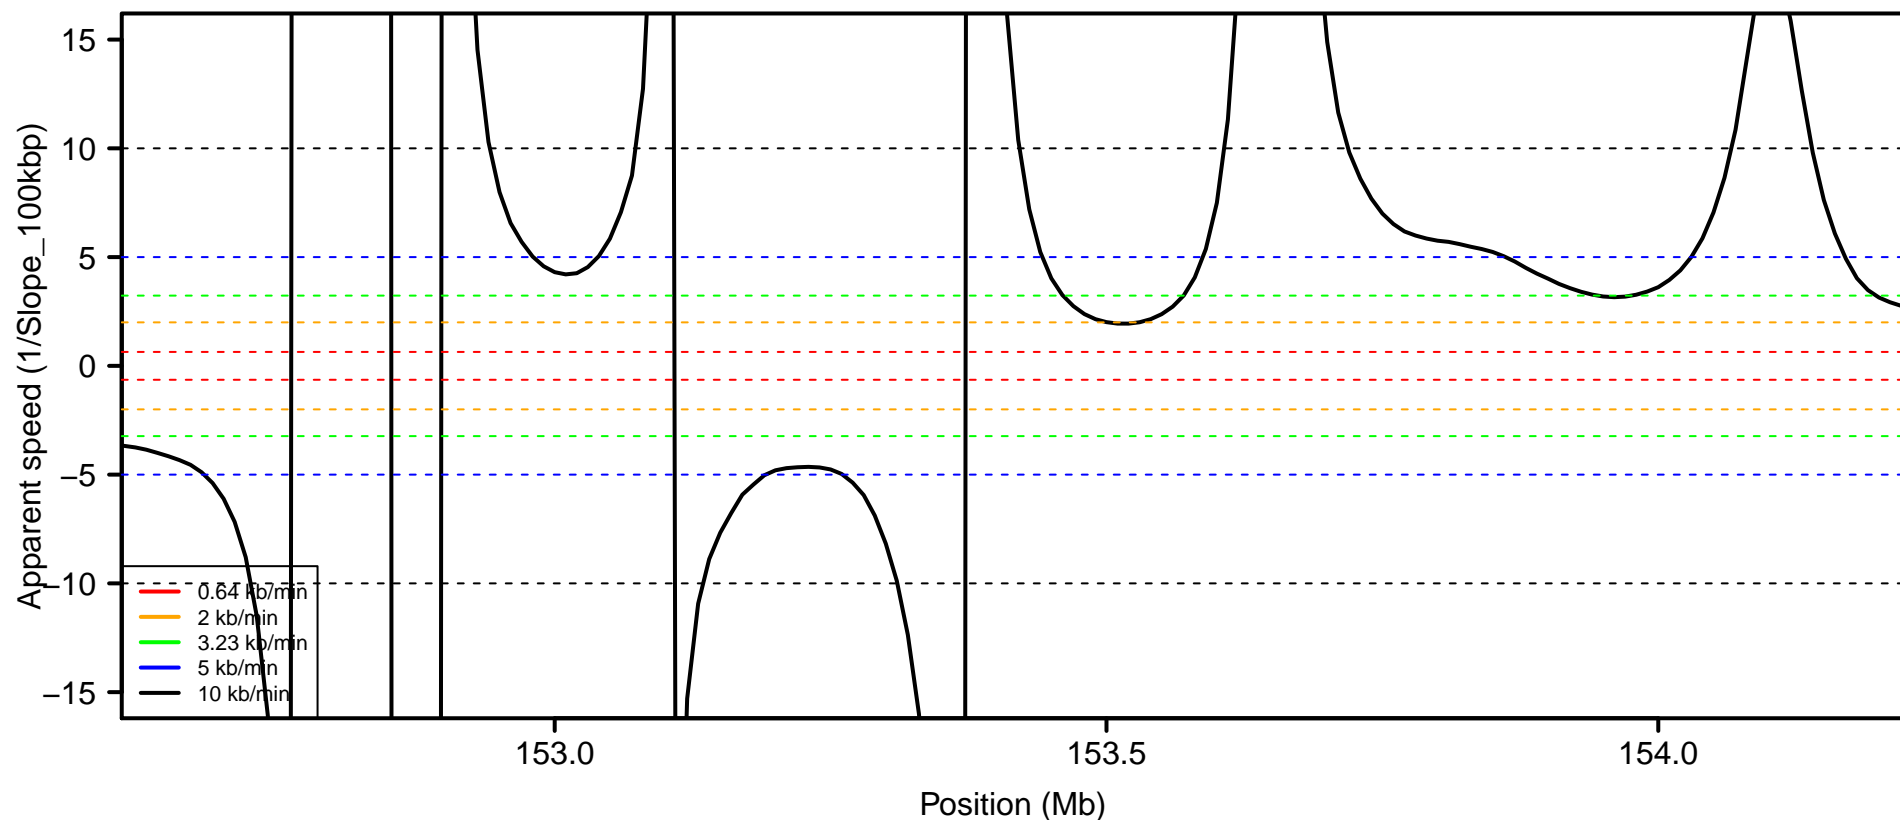

Supplement: pcbi.1002322.s005.pdf [file pcbi.1002322.s005.pdf]
